# Supplementary material for: Modeling one thousand intron length distributions with fitild
Source: PubMed Central journal article supplement — Bioinformatics. 2018 May 2;34(19):3258–64. doi: 10.1093/bioinformatics/bty353 (PMC6157073; doi:10.1093/bioinformatics/bty353), 2018-05-02
Supplement: bty353_supplentary_material.pdf [file bty353_supplentary_material.pdf]

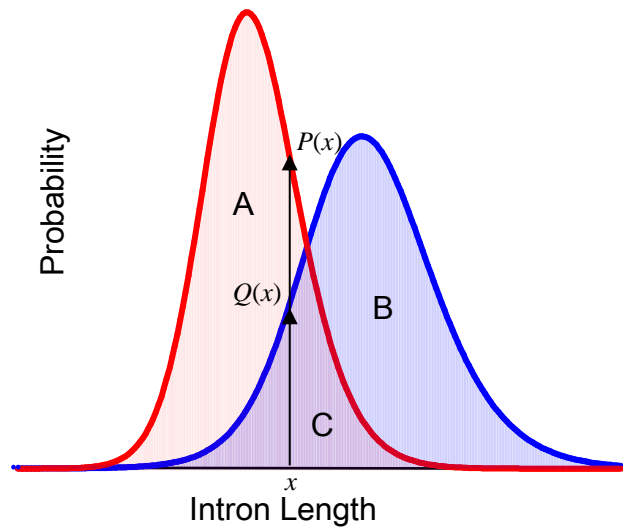

| Abbr. | Distance            | Definition                                                                                                                   |
|-------|---------------------|------------------------------------------------------------------------------------------------------------------------------|
| CS    | Cosine              | $\text{Arccos}\left(\frac{\sum_x P(x)Q(x)}{\sqrt{\sum_x P(x)^2 \sum_x Q(x)^2}}\right)$                                       |
| EC    | Euclid              | $\sqrt{\sum_x (P(x) - Q(x))^2}$                                                                                              |
| E2    | Euclid <sup>2</sup> | $\sum_x (P(x) - Q(x))^2$                                                                                                     |
| KL    | Kullback-Leibler    | $\left(\sum_x P(x) \log\left(\frac{P(x)}{Q(x)}\right) + \sum_x Q(x) \log\left(\frac{Q(x)}{P(x)}\right)\right)/2$             |
| JA    | Jaccard             | $(A + B)/(A + B + C)$                                                                                                        |
| JS    | Jensen-Shannon      | $\left(\sum_x P(x) \log\left(\frac{2P(x)}{P(x)+Q(x)}\right) + \sum_x Q(x) \log\left(\frac{2Q(x)}{P(x)+Q(x)}\right)\right)/2$ |
| MH    | Manhattan           | $\sum_x  P(x) - Q(x) $                                                                                                       |

**Figure S1. Measure of distance between ILDs.**  $P(x)$  and  $Q(x)$  represent two ILDs to be compared. A, B, and C denote the specified area. For continuous ILD models, summation should be replaced by integration.

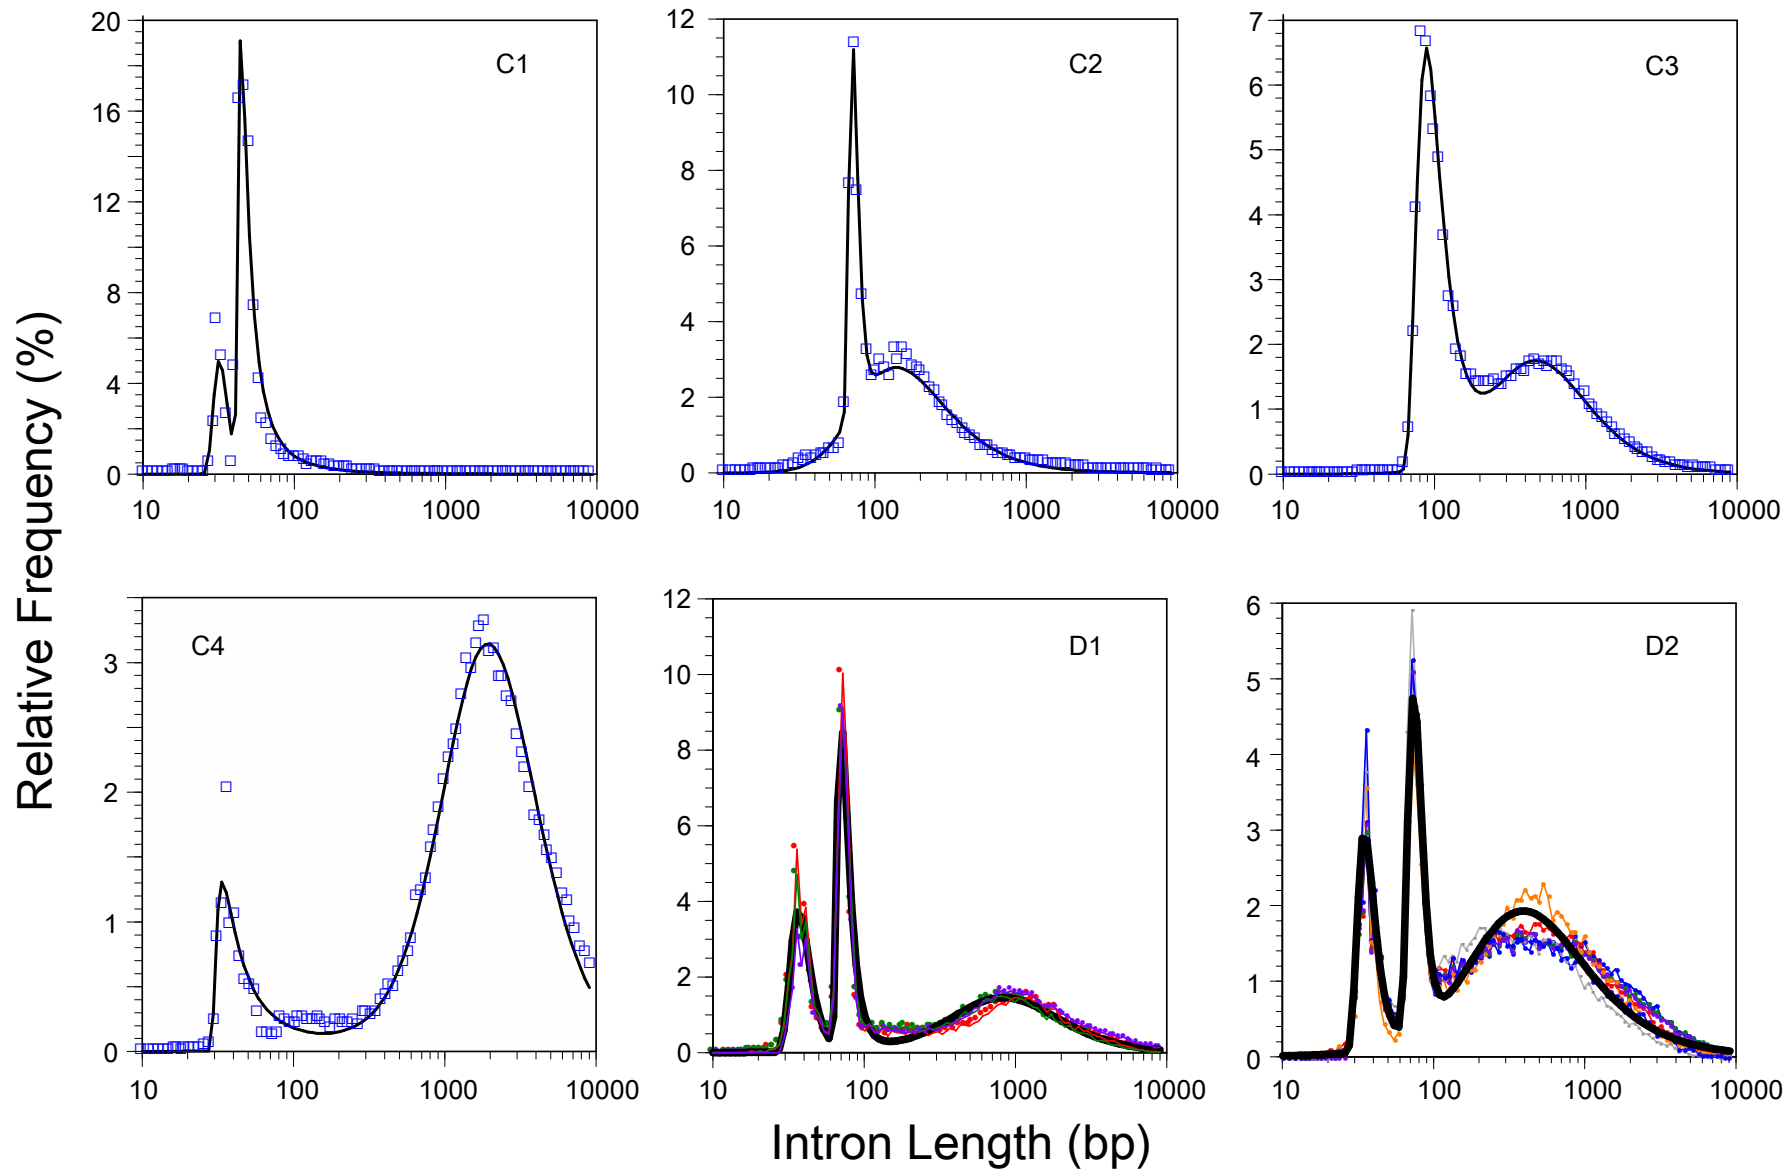

**Figure S2. Statistical models (lines) and observed ILDs (marks) of enlarged versions of Figures 1C and 1D.** C1: *Dioszegia cryoxerica* (fungus), C2: *Emiliania huxleyi* (protist), C3: *Oryza brachyantha* (plant), C4: *Schistosoma haematobium* (animal), D1: ensemble model of three *Hymenolepis*, D2: ensemble model of six *Taeniidae* plus one *Mesocestoididae* members of tapeworms. In D1 and D2, thick black line represents the model ILD whereas colored thin lines with dots represent individual observed ILDs.

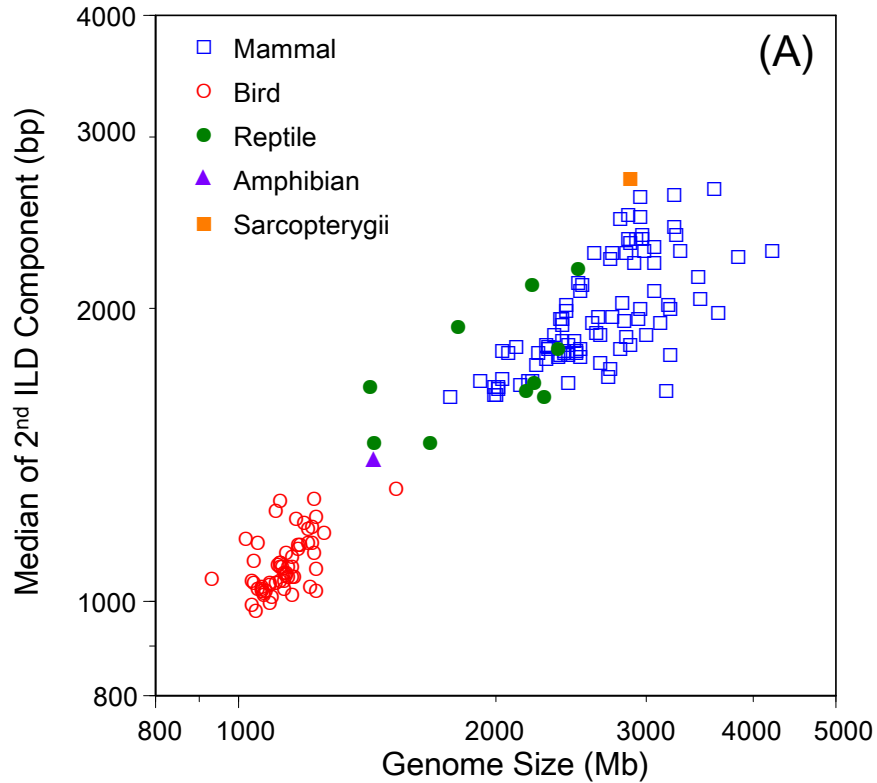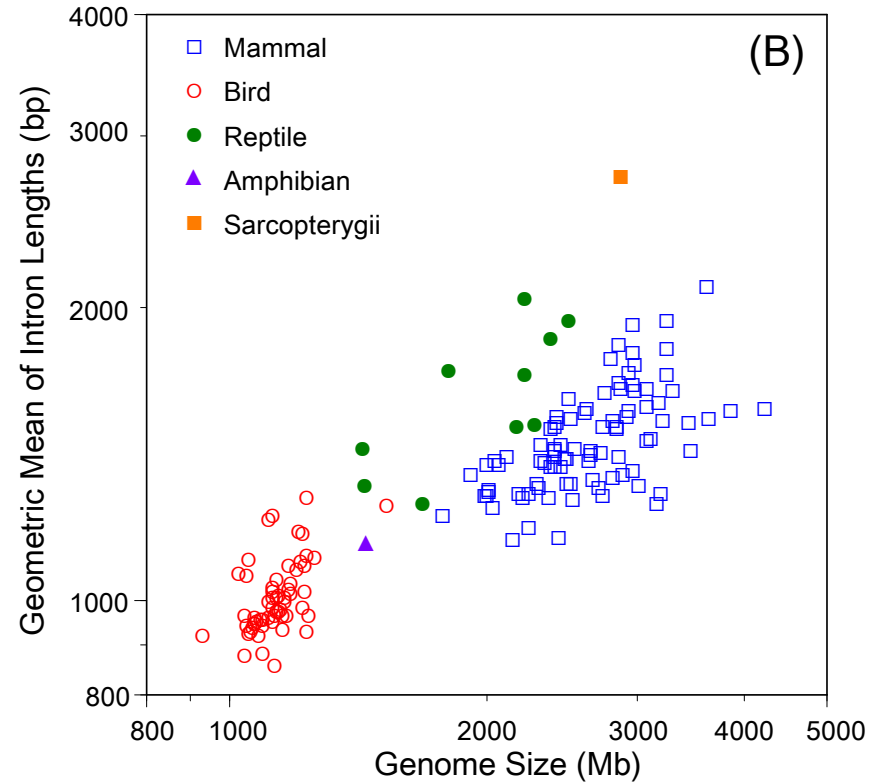

**Figure S3. Log-log plot between genome size (X-axis) and representative value of intron lengths (Y-axis) for 161 tetrapods.** (A) Y-axis represents the median of the second component of each two-component ILD model. (B) Y-axis represents the gross geometric mean of each observed ILD.

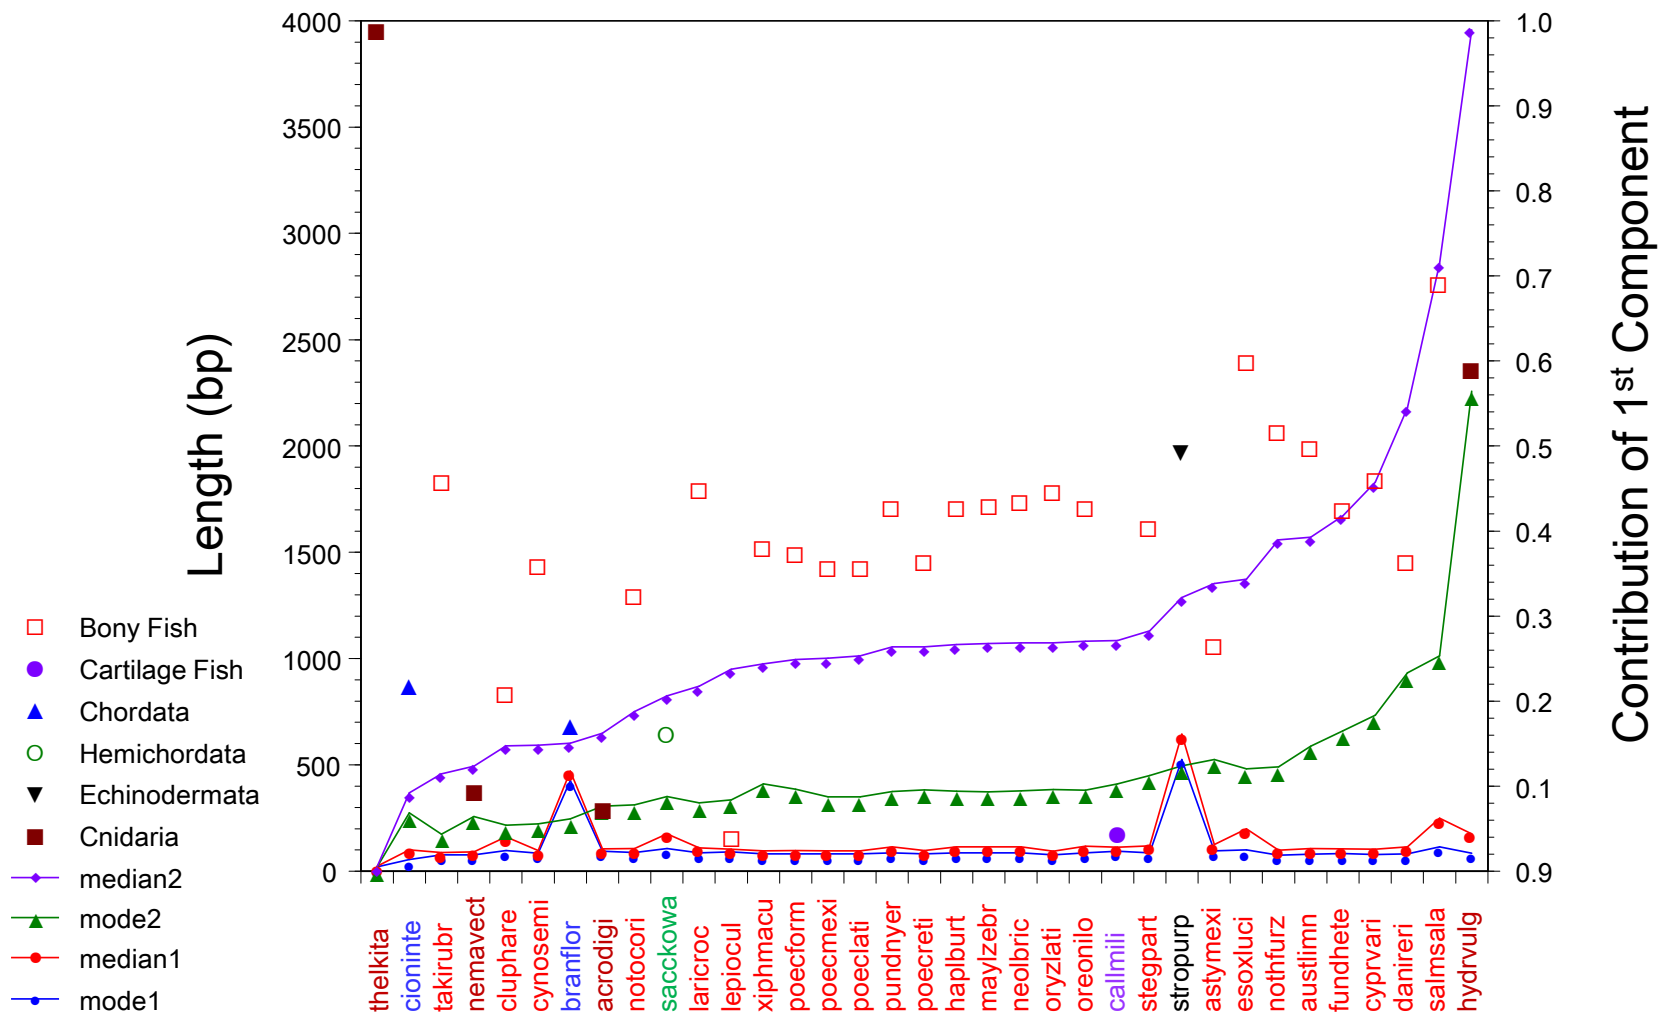

**Figure S4. Ident characteristics of Deuterostomes and *Cnidaria*.** The species code and numerical values are listed in Table S3. Taxonomic clades are color coded. Small symbols with connecting lines indicate mode and median of individual ilidents. Large symbols indicate the fractional contributions of the first (shorter) ilidents.

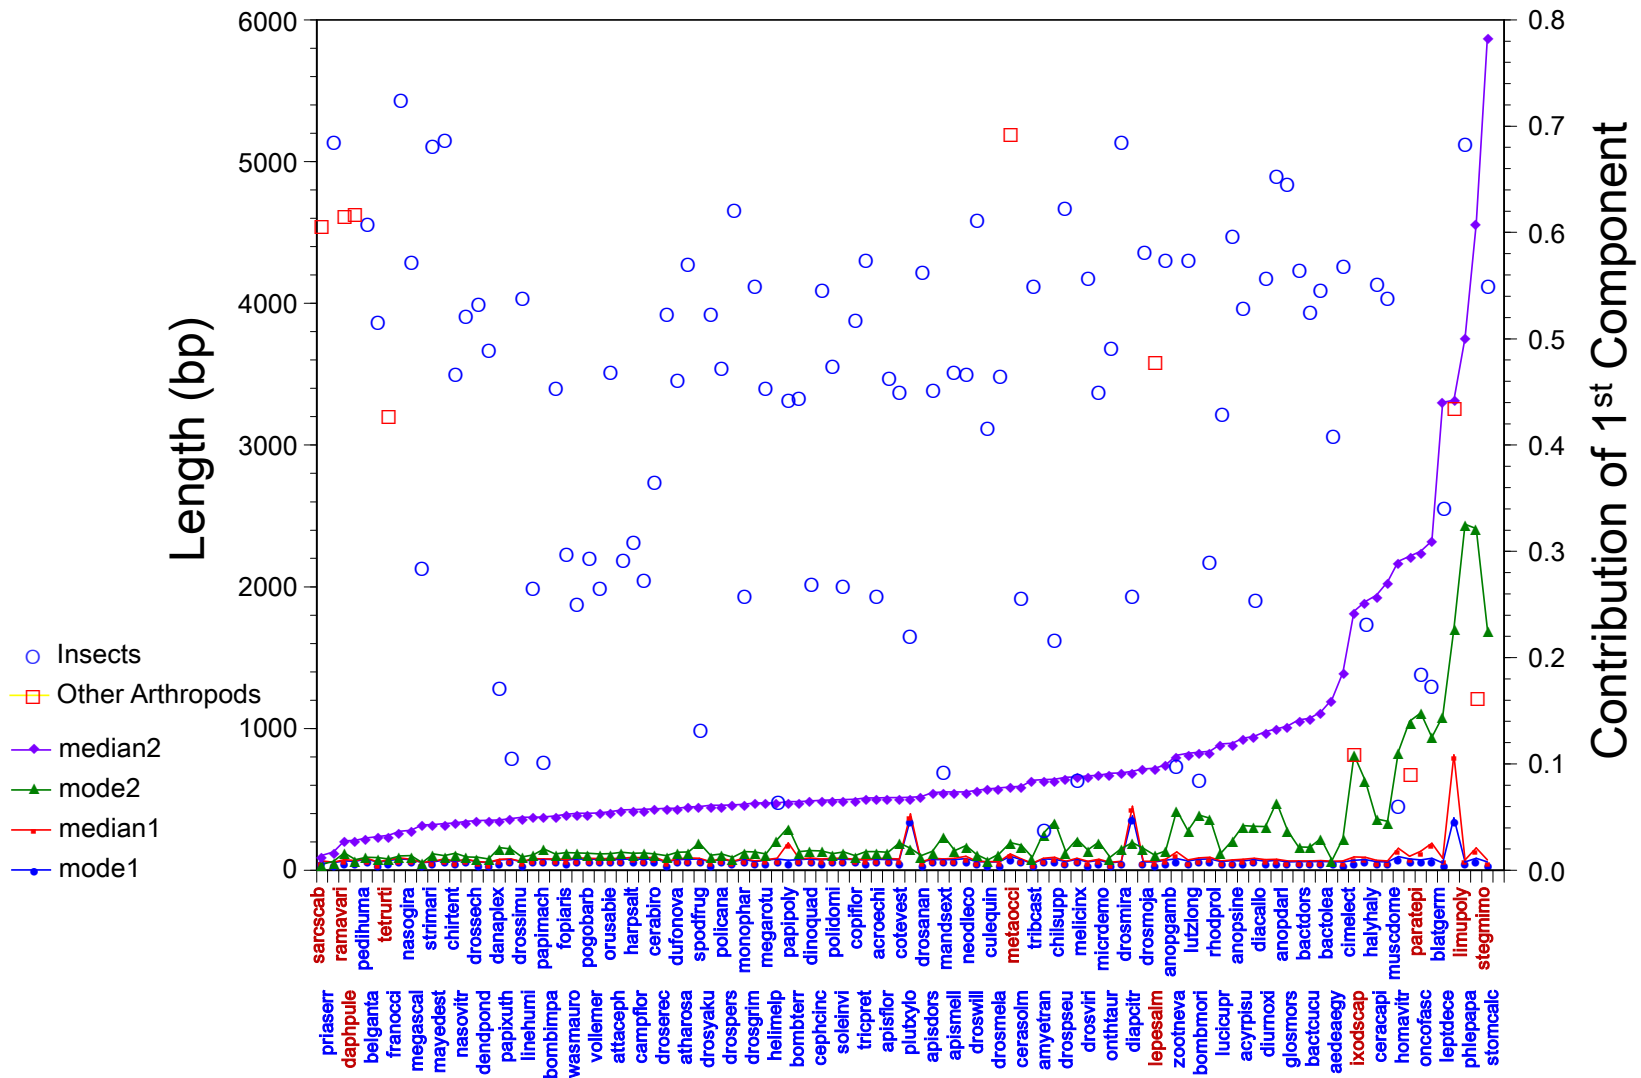

**Figure S5. Ildent characteristics of Arthropods.** The species code and numerical values are listed in Table S3. Taxonomic clades are color coded. Small symbols with connecting lines indicate mode and median of individual ildents. Large symbols indicate the fractional contributions of the first (shorter) ildents.

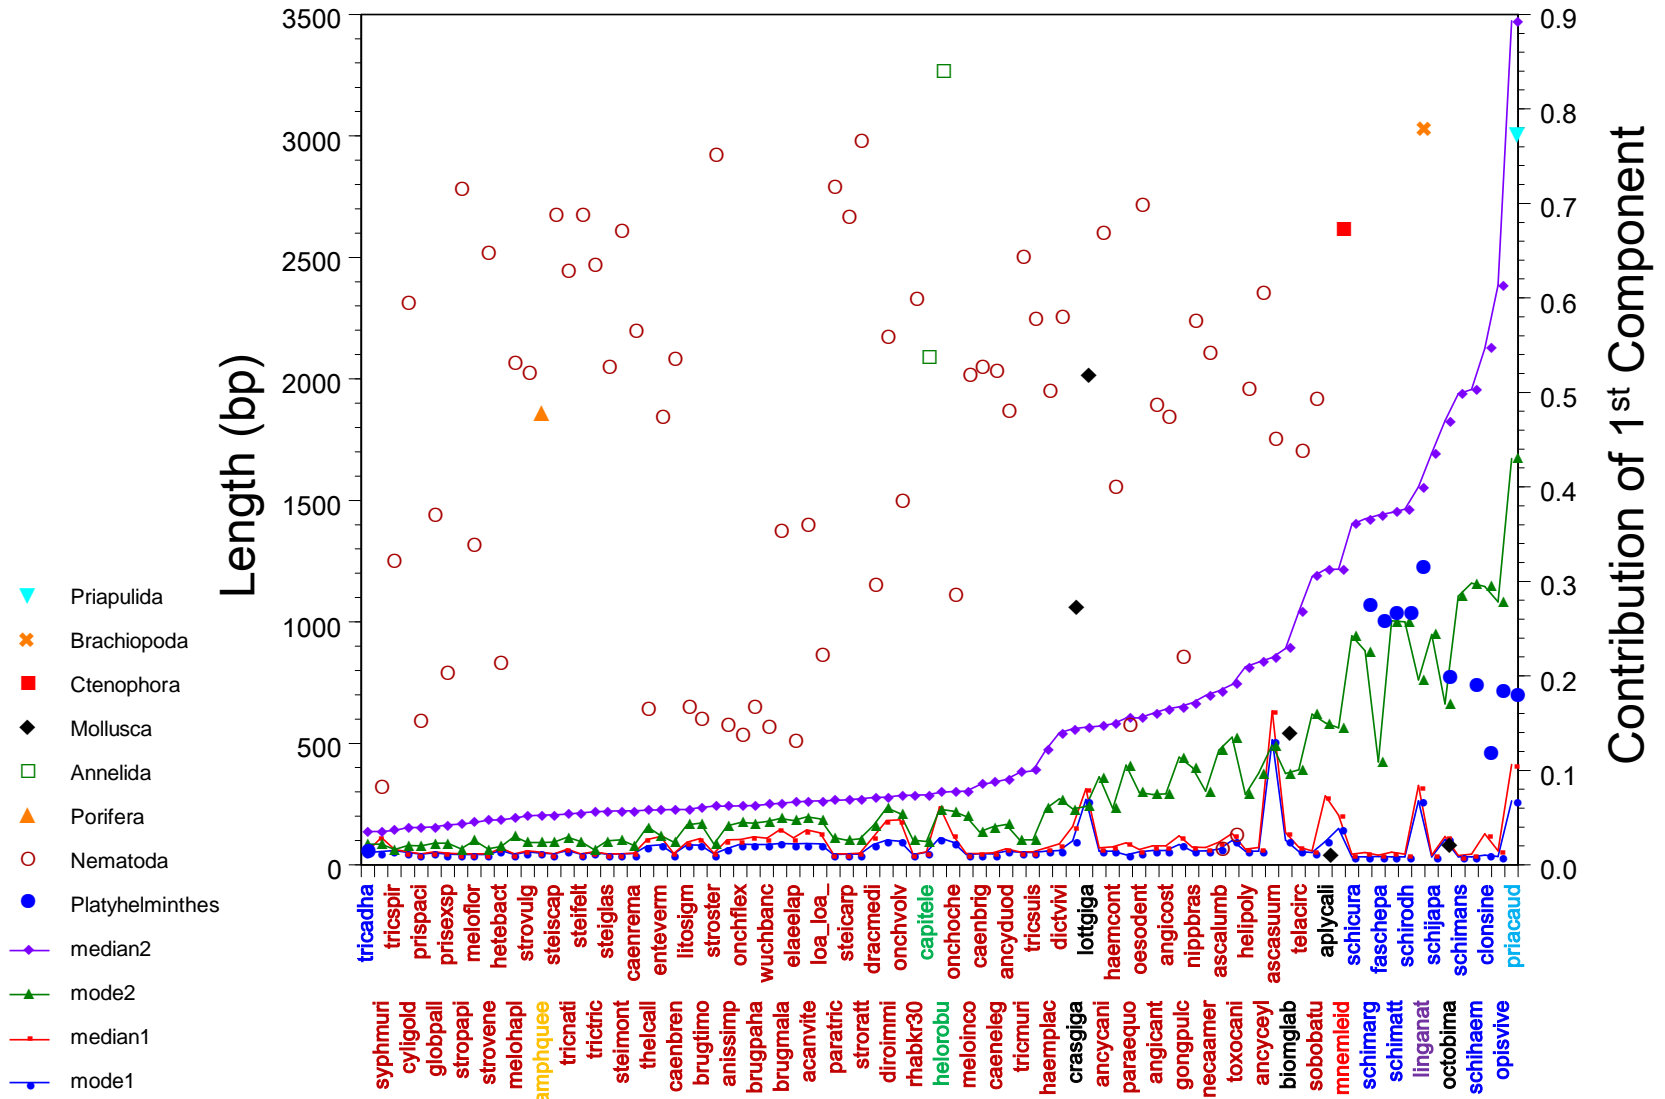

**Figure S6. Ildent characteristics of two-component ILDs of miscellaneous metazoans.** The species code and numerical values are listed in Table S3. Taxonomic clades are color coded. Small symbols with connecting lines indicate mode and median of individual ildents. Large symbols indicate the fractional contributions of the first (shorter) ildents.

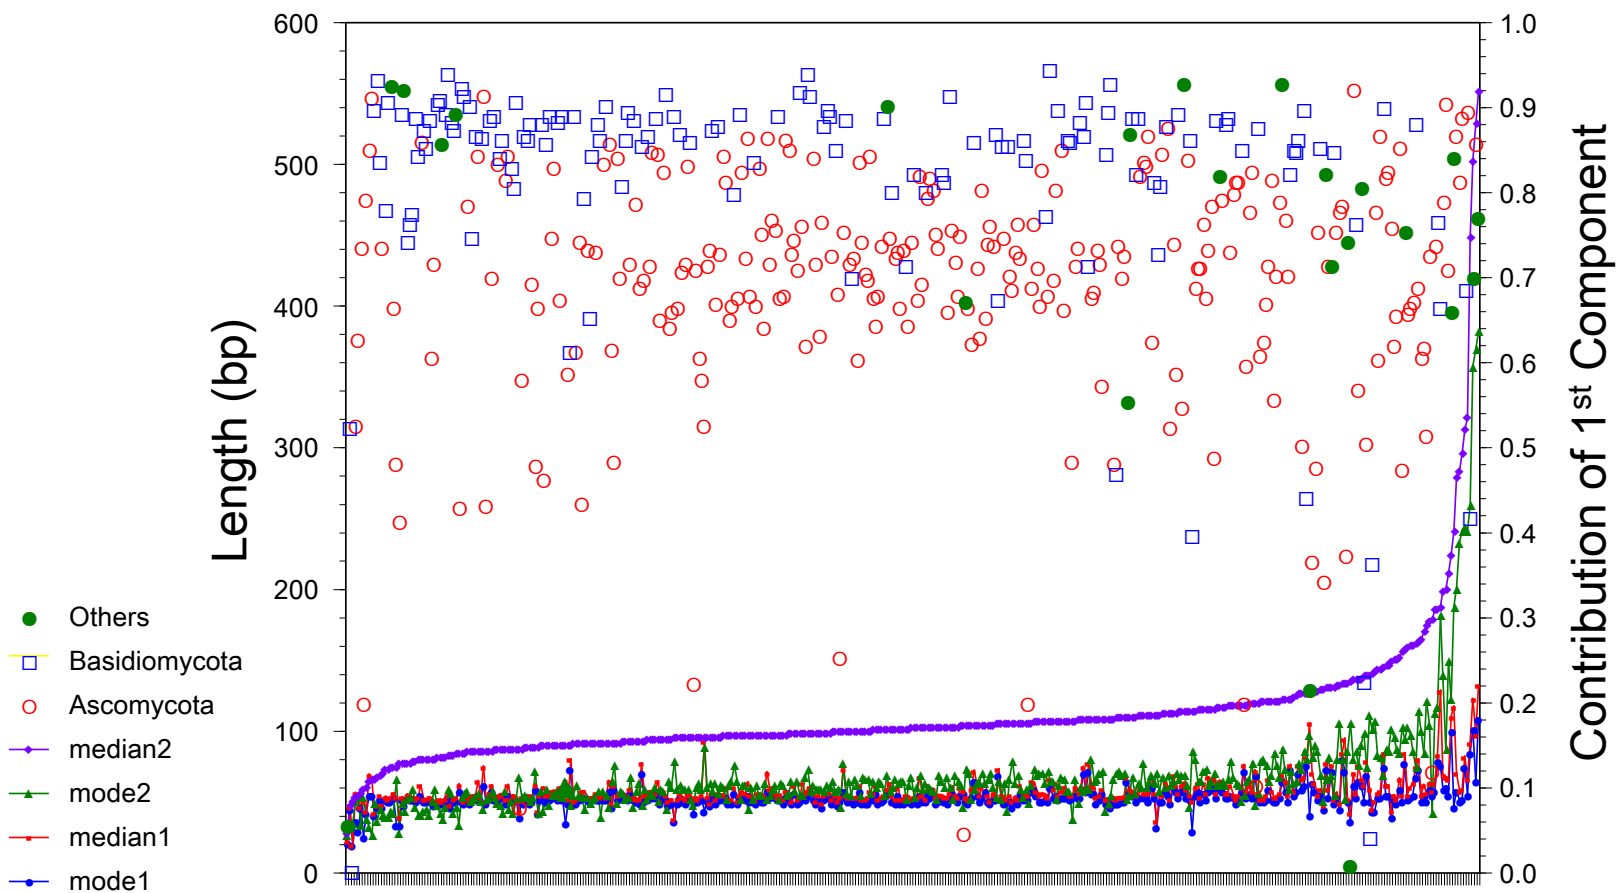

**Figure S7. Ildent characteristics of 416 fungi.** Numerical values are listed in Table S3. Taxonomic clades are color coded. Small symbols with connecting lines indicate mode and median of individual ildents. Large symbols indicate the fractional contributions of the first (shorter) ildents.

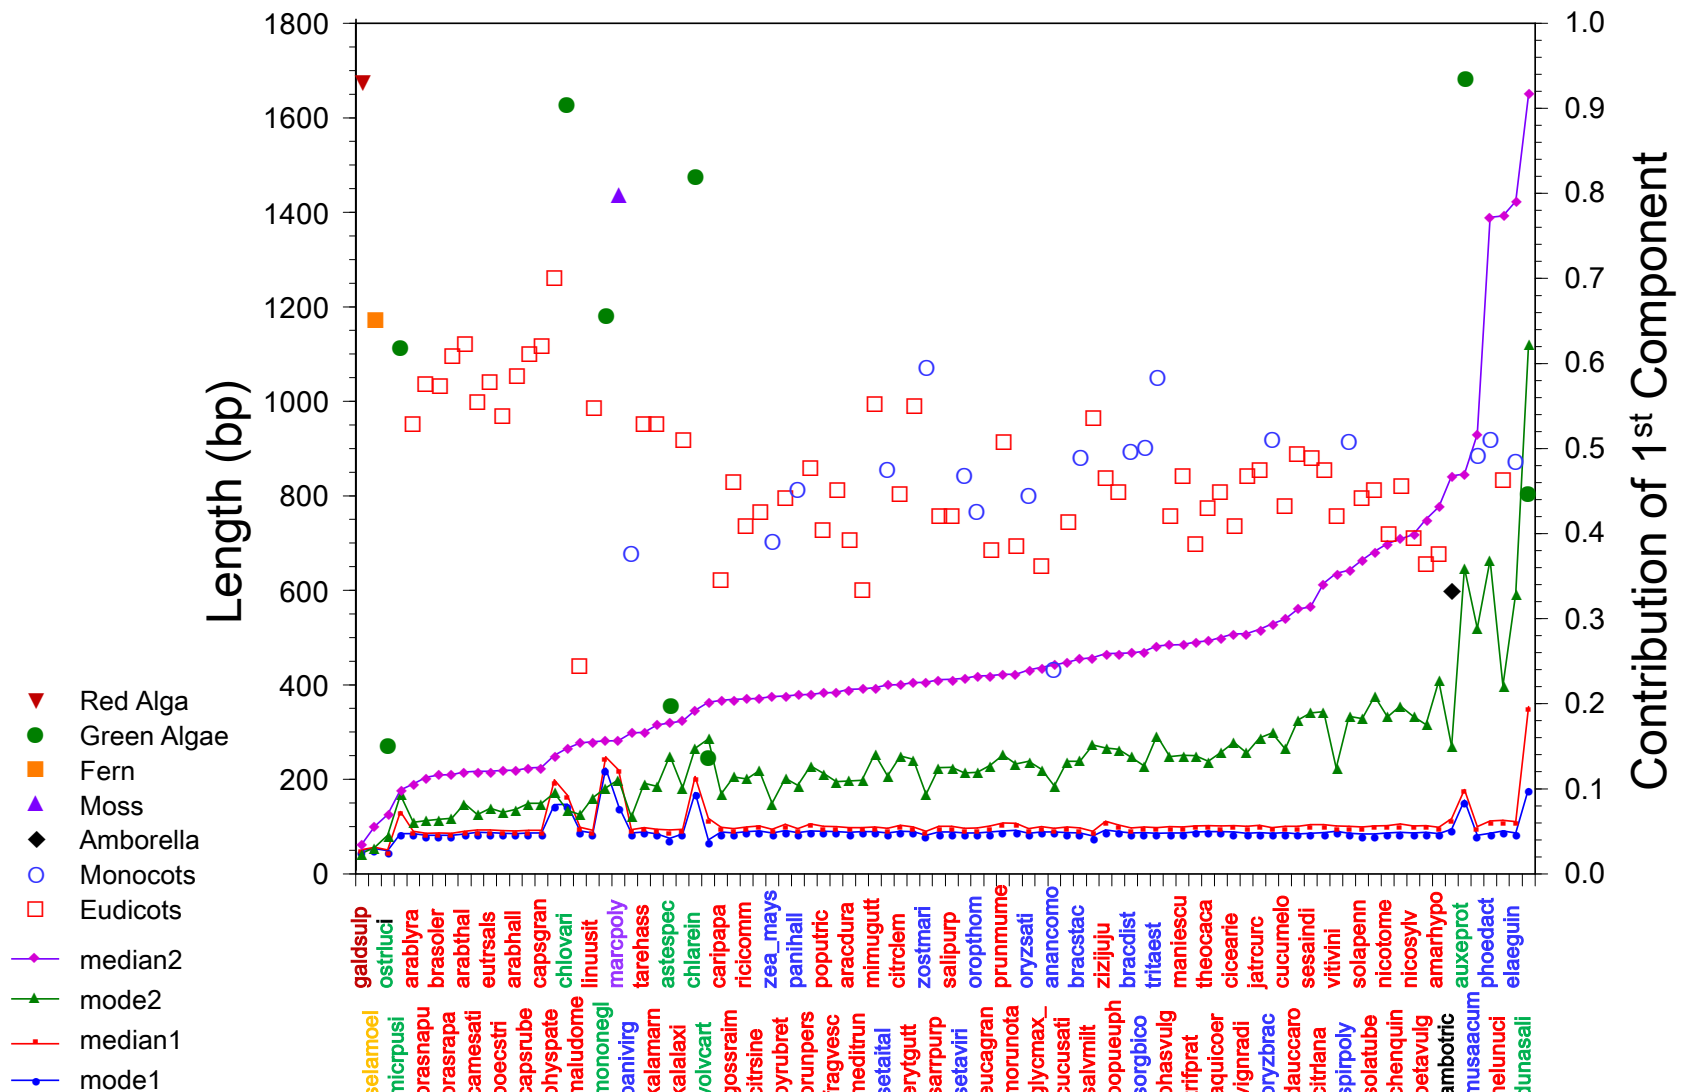

**Figure S8. Ident characteristics of Plants.** The species code and numerical values are listed in Table S3. Taxonomic clades are color coded. Small symbols with connecting lines indicate mode and median of individual ildents. Large symbols indicate the fractional contributions of the first (shorter) ildents.





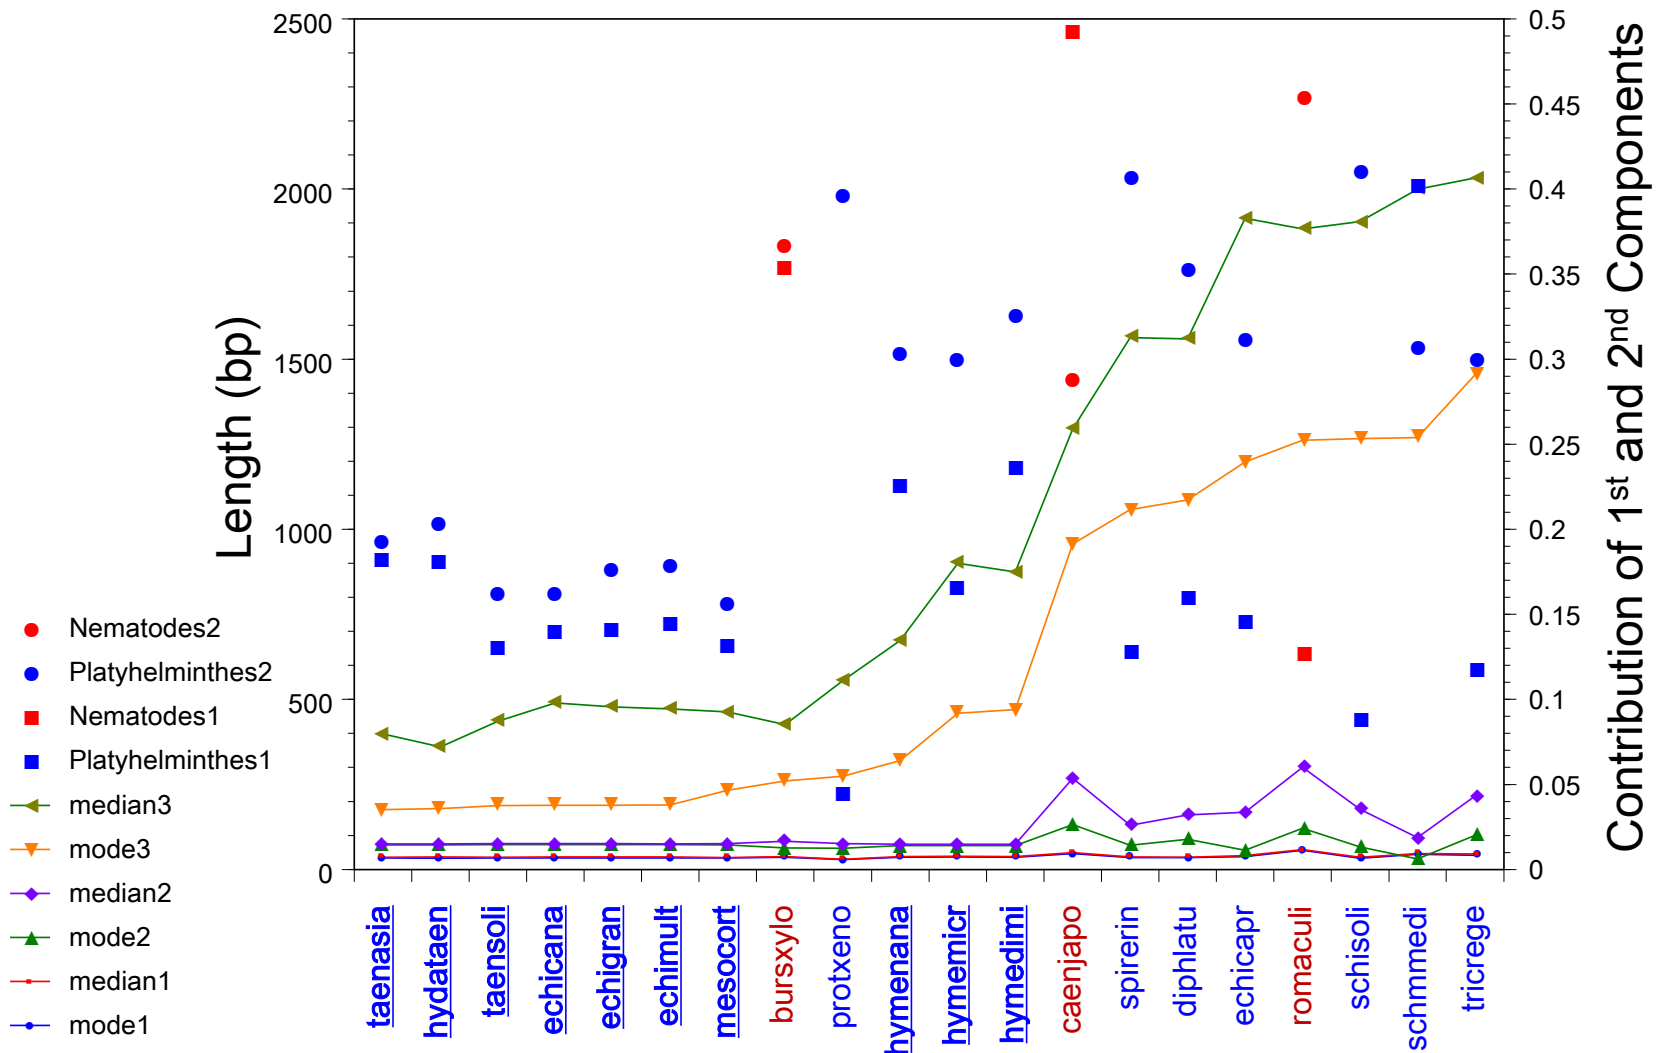

**Figure S10. Ident characteristics of triple modal ILDs.** The species code and numerical values are listed in Table S3. Taxonomic clades are color coded. Small symbols with connecting lines indicate mode and median of individual ildents. Large squares and large circles indicate the fractional contributions of the first (shortest) and the second ildents, respectively.

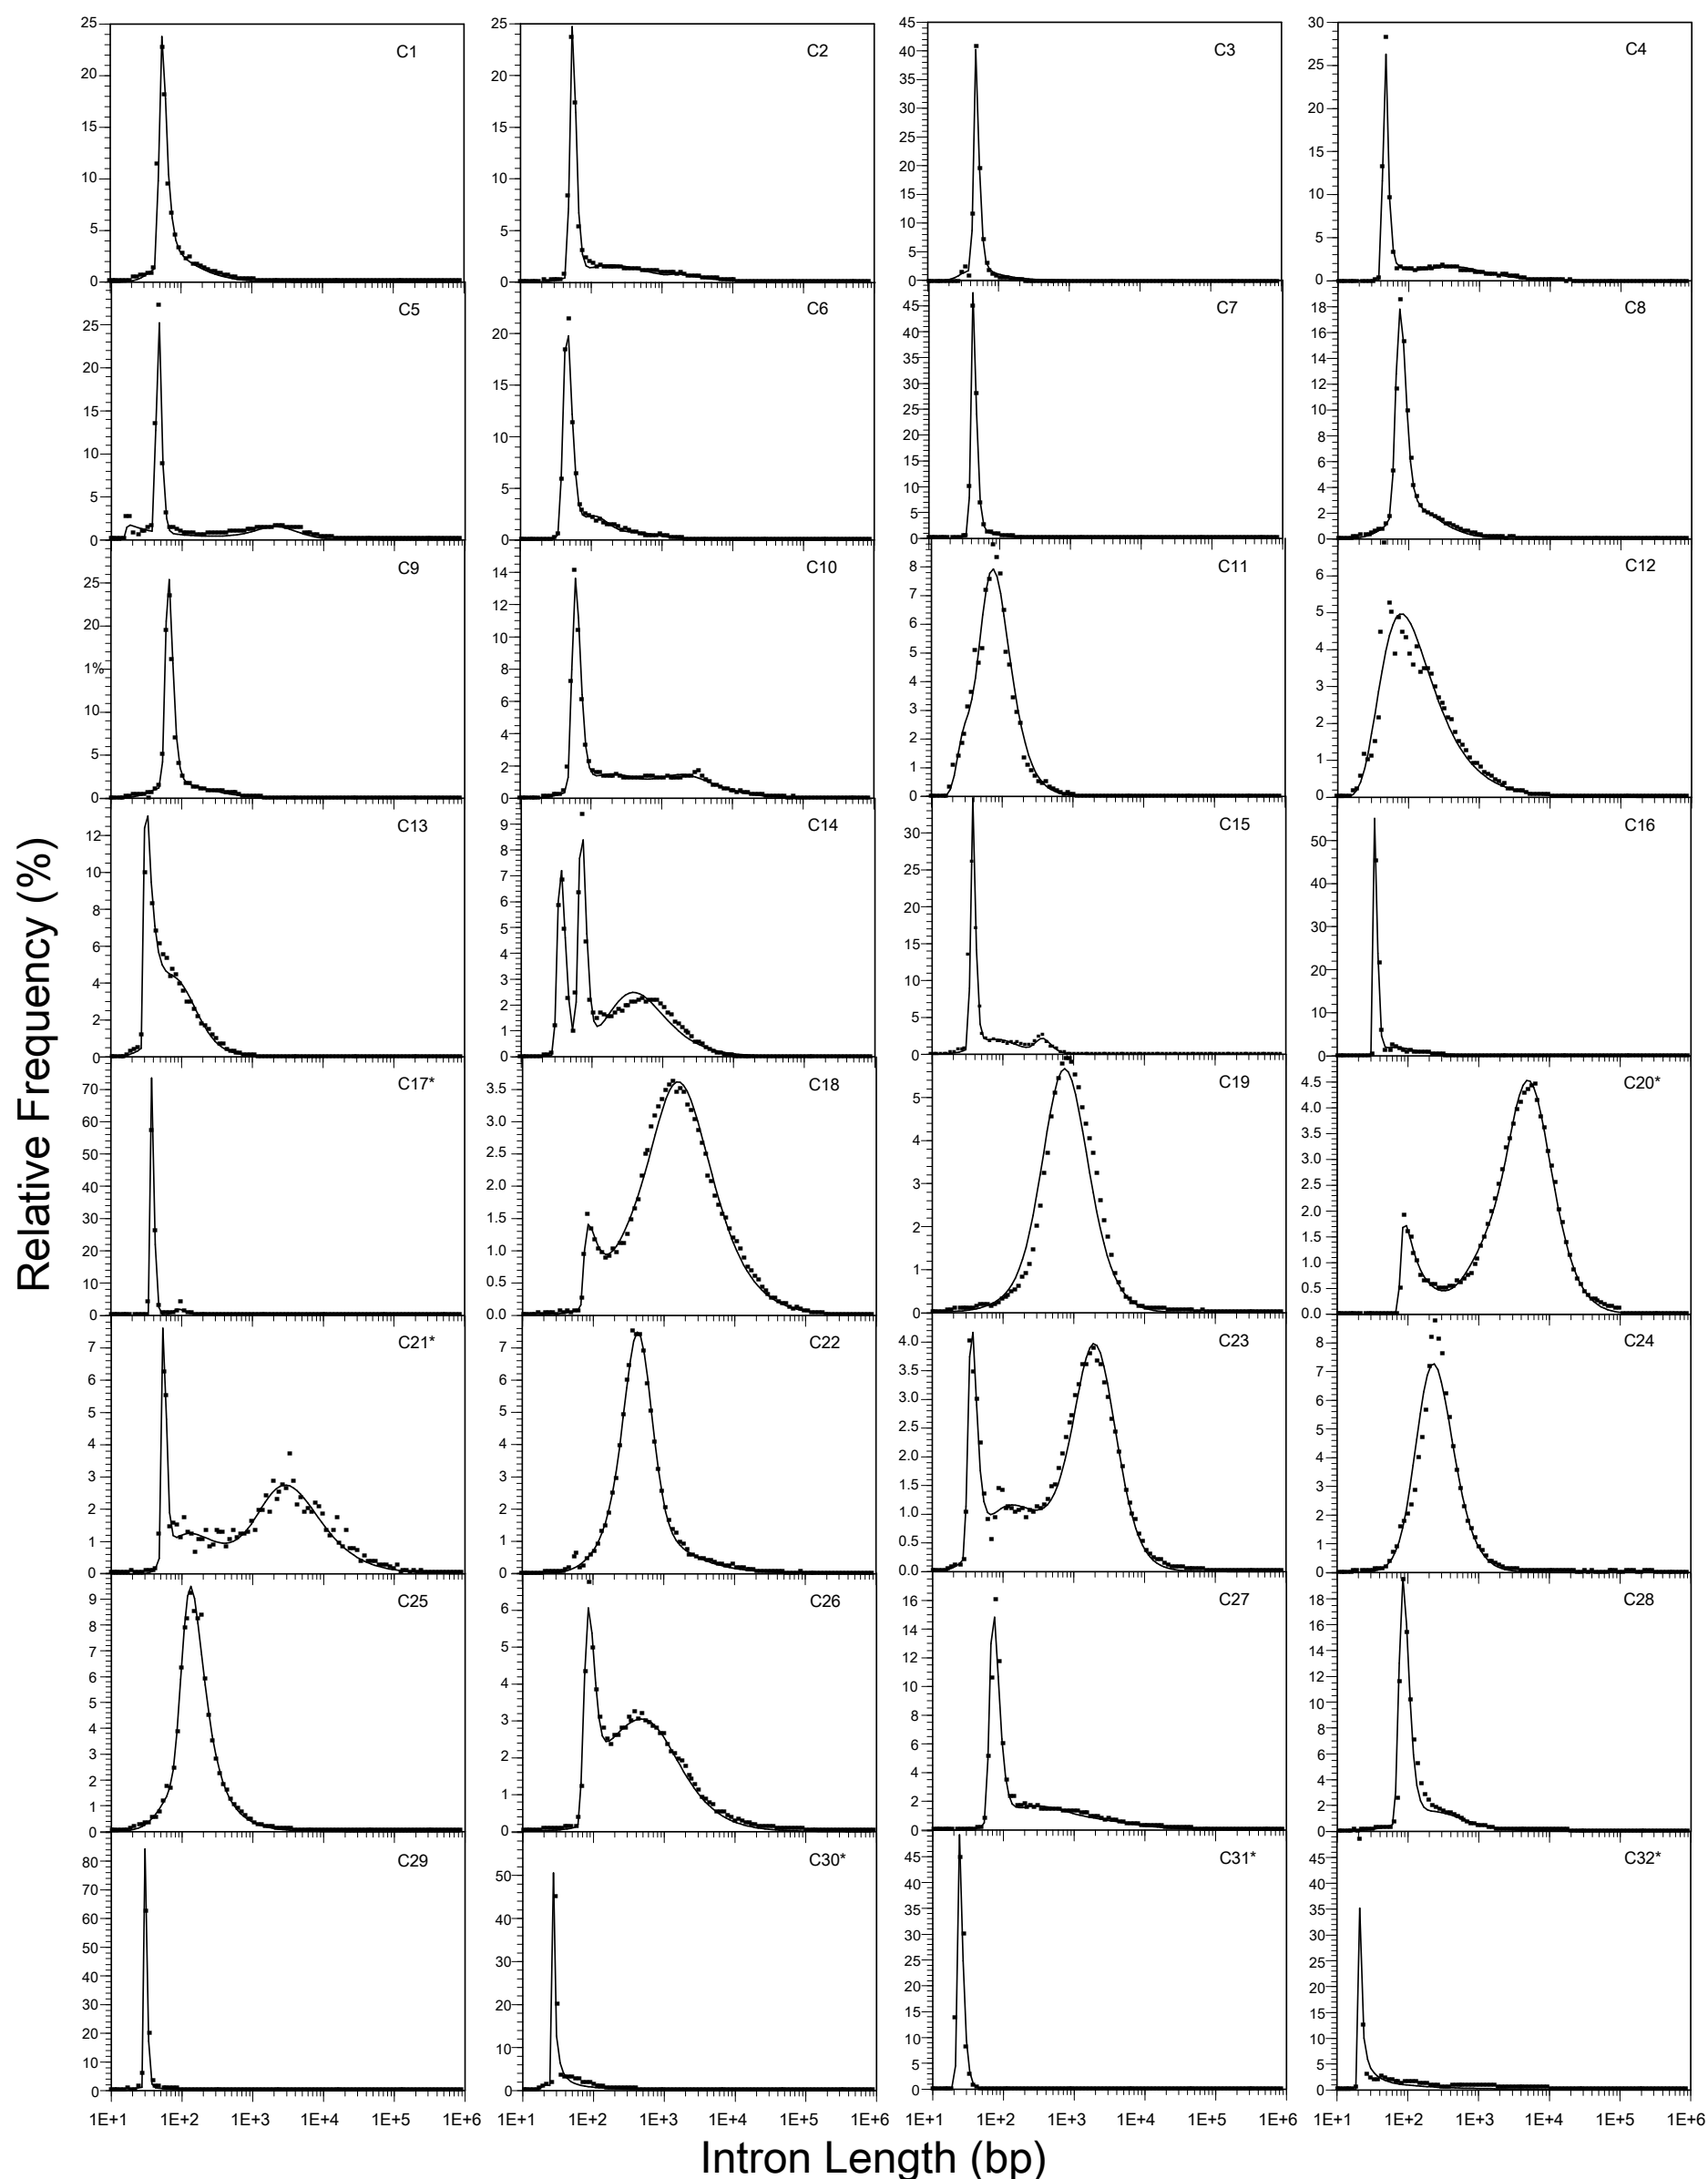

**Figure S11. Consensus ILDs of 32 Clusters.** Observed ILDs (small boxes) were obtained by sampling introns from the species in the cluster. Statistical models (lines) were obtained with *Fitild* as described in the text. Characteristics of individual consensus ILDs are summarized in Supplementary Table S4. Asterisk indicates singleton cluster.

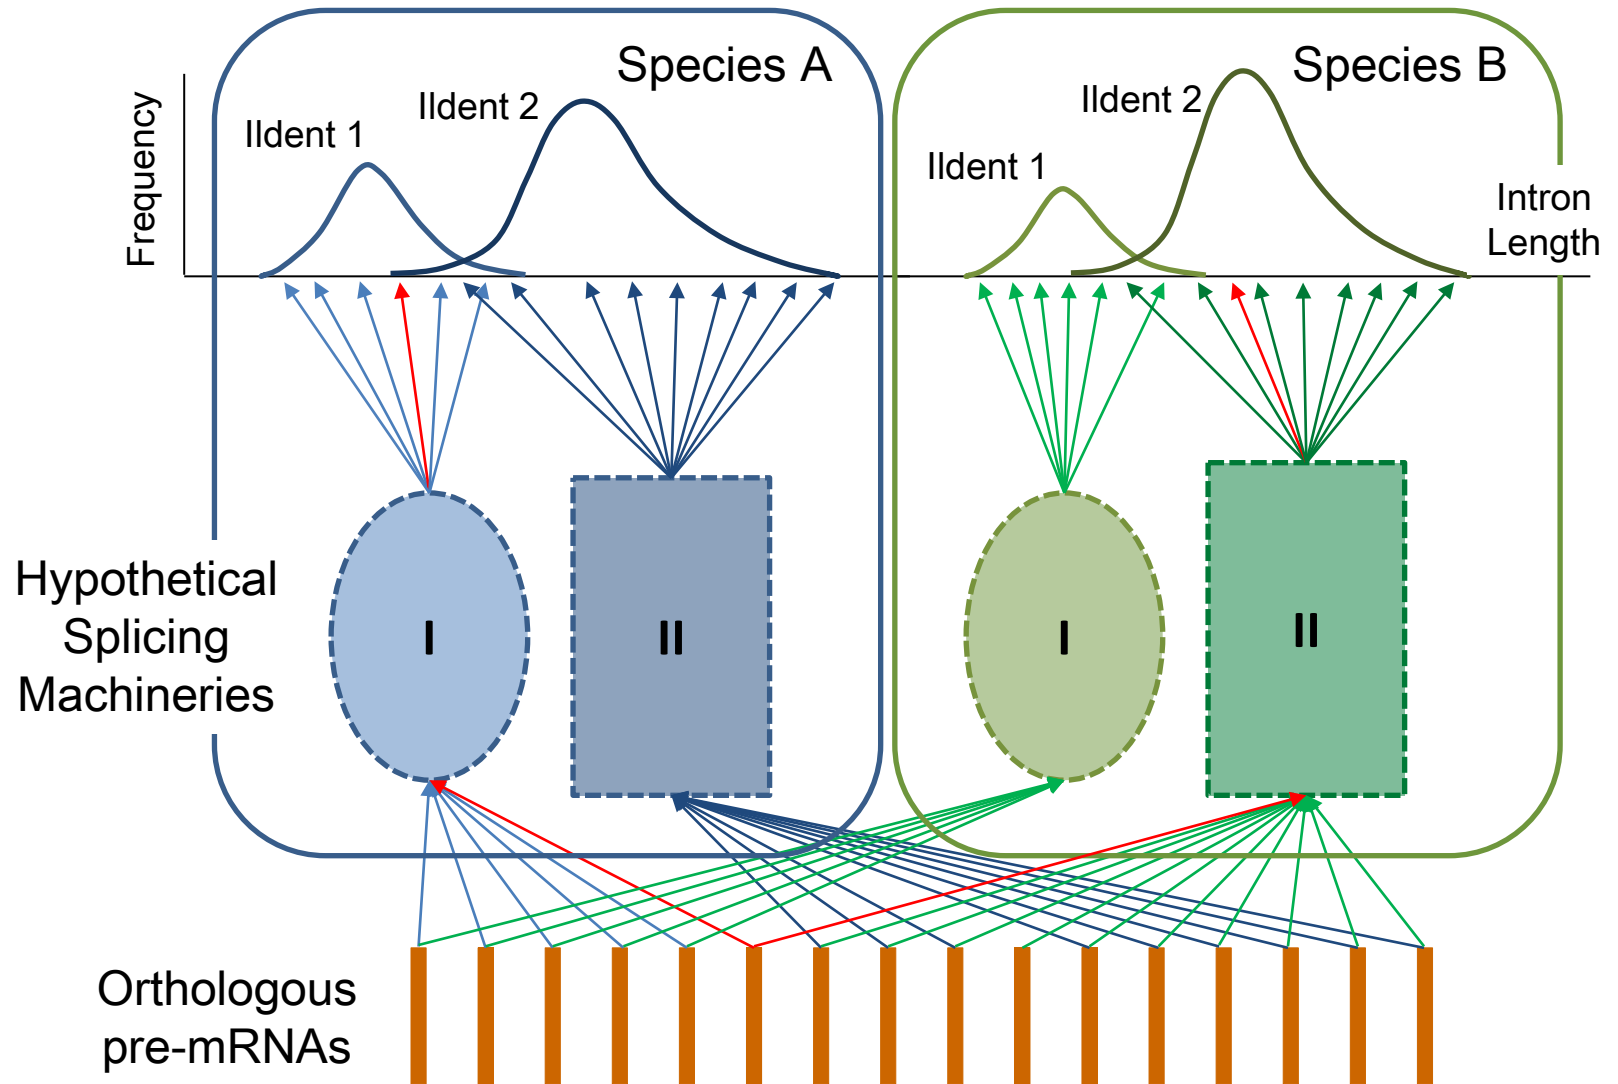

**Figure S12. Schematic presentation of the concept of ildents.** Orthologous introns in species A and B are processed by either of the conserved hypothetical splicing machineries I or II. An ildent refers to the subset of introns processed by one of the machineries. The ildents processed by the same type of machinery in different species are labeled identically. When the subset of introns is inferred by decomposition of an observed ILD, each component of the ILD may also be called an ildent. Orthologous introns are generally processed by the same type of machineries but rare discordances can occur (red arrows). For simplicity, each pre-mRNA is assumed to have at most one intron.

Supplementary Table S1. Resources of sequence data.

| SpecID   | Species                       | Genome | Transcript | Annotation |
|----------|-------------------------------|--------|------------|------------|
| aaosarxi | Aaosphaeria arxii             | JGI    | jgi        | -          |
| acancast | Acanthamoeba castellanii      | EMBL   | -          | embl       |
| acanchlo | Acanthisitta chloris          | NCBI   | -          | ncbi       |
| acavite  | Acanthocheilonema viteae      | WORM   | -          | worm       |
| acidrich | Acidomyces richmondensis      | JGI    | jgi        | -          |
| acinjuba | Acinonyx jubatus              | NCBI   | -          | ncbi       |
| acrealca | Acremonium alcalophilum       | JGI    | jgi        | -          |
| acrestri | Acremonium strictum           | JGI    | jgi        | -          |
| acrodigi | Acropora digitifera           | NCBI   | -          | ncbi       |
| acroechi | Acromyrmex echinator          | NCBI   | -          | ncbi       |
| acyrpisu | Acyrtosiphon pisum            | NCBI   | -          | ncbi,embl  |
| acytsubg | Acyrostelium subglobosum      | NCBI   | ncbi       | ncbi       |
| aedeaegy | Aedes aegypti                 | NCBI   | insc       | ncbi,embl  |
| agarbisp | Agaricus bisporus             | JGI    | jgi        | -          |
| agarhyph | Agaricostilbum hyphaenes      | JGI    | jgi        | -          |
| ailumela | Ailuropoda melanoleuca        | NCBI   | -          | ncbi       |
| albucand | Albugo candida                | EMBL   | -          | embl       |
| albulaib | Albugo laibachii              | EMBL   | -          | embl       |
| allimiss | Alligator mississippiensis    | NCBI   | -          | ncbi       |
| allisine | Alligator sinensis            | NCBI   | -          | ncbi       |
| altealte | Alternaria alternata          | JGI    | jgi        | -          |
| altebras | Alternaria brassicicola       | JGI    | -          | jgi        |
| amanmusc | Amanita muscaria              | JGI    | -          | jgi        |
| amanthie | Amanita thiersii              | JGI    | jgi        | -          |
| amarhypo | Amaranthus hypochondriacus    | PHYT   | -          | phyt       |
| ambotric | Amborella trichopoda          | PHYT   | gdb        | -          |
| amnilign | Amniculicola lignicola        | JGI    | jgi        | -          |
| amorresi | Amorphotheca resiniae         | JGI    | jgi        | -          |
| amphquee | Amphimedon queenslandica      | EMBL   | -          | ncbi,embl  |
| amyetran | Amyeloides transitella        | NCBI   | -          | ncbi       |
| anancomo | Ananas comosus                | PHYT   | -          | phyt       |
| anasplat | Anas platyrhynchos            | NCBI   | -          | ncbi       |
| ancycani | Ancylostoma caninum           | WORM   | -          | worm       |
| ancyceyl | Ancylostoma ceylanicum        | WORM   | -          | worm       |
| ancyduod | Ancylostoma duodenale         | WORM   | -          | worm       |
| angicant | Angiostrongylus cantonensis   | WORM   | -          | worm       |
| angicost | Angiostrongylus costaricensis | WORM   | -          | worm       |
| angodean | Angomonas deanei              | EMBL   | dbest      | embl       |
| anissimp | Anisakis simplex              | WORM   | -          | worm       |
| anolcaro | Anolis carolinensis           | NCBI   | -          | ncbi       |
| anopalbi | Anopheles albimanus           | INSC   | insc       | -          |
| anopdarl | Anopheles darlingi            | INSC   | insc       | embl       |
| anopgamb | Anopheles gambiae             | INSC   | -          | ncbi,embl  |
| anopglab | Anoplophora glabripennis      | INSC   | insc       | -          |
| anopsine | Anopheles sinensis            | INSC   | insc       | insc       |
| ansecygn | Anser cygnoides               | NCBI   | -          | ncbi       |
| anthavoc | Anthostoma avocetta           | JGI    | jgi        | -          |
| antrsinu | Antrodia sinuosa              | JGI    | jgi        | -          |
| aotunanc | Aotus nancymae                | NCBI   | -          | ncbi       |
| apalvitt | Apaloderma vittatum           | NCBI   | -          | ncbi       |
| aphaasta | Aphanomyces astaci            | EMBL   | -          | embl       |

|           |                            |      |          |           |
|-----------|----------------------------|------|----------|-----------|
| aphainva  | Aphanomyces invadans       | EMBL | -        | embl      |
| apiomont  | Apiospora montagnei        | JGI  | jgi      | -         |
| apisdors  | Apis dorsata               | INSC | -        | ncbi      |
| apisflor  | Apis florea                | INSC | -        | ncbi      |
| apismell  | Apis mellifera             | INSC | -        | ncbi,embl |
| aplakerg  | Aplanochytrium kerguelense | JGI  | jgi      | -         |
| aploprun  | Aplosporella prunicola     | JGI  | jgi      | -         |
| aplycali  | Aplysia californica        | NCBI | -        | ncbi      |
| aporcary  | Aporpium caryae            | JGI  | jgi      | -         |
| apte aust | Apteryx australis          | NCBI | -        | ncbi      |
| aptefors  | Aptenodytes forsteri       | NCBI | -        | ncbi      |
| aquichry  | Aquila chrysaetos          | NCBI | -        | ncbi      |
| aquicoer  | Aquilegia coerulea         | PHYT | gdb,unig | -         |
| arabhall  | Arabidopsis halleri        | PHYT | -        | phyt      |
| arablyra  | Arabidopsis lyrata         | PHYT | jgi      | -         |
| arabthal  | Arabidopsis thaliana       | PHYT | gdb,unig | -         |
| aracdura  | Arachis duranensis         | NCBI | -        | ncbi      |
| armigall  | Armillaria gallica         | JGI  | jgi      | -         |
| armimell  | Armillaria mellea          | JGI  | -        | jgi       |
| arthbenh  | Arthroderma benhamiae      | JGI  | -        | jgi       |
| artholig  | Arthrobotrys oligospora    | JGI  | -        | jgi       |
| artoeleg  | Artolenzites elegans       | JGI  | jgi      | -         |
| ascalumb  | Ascaris lumbricoides       | WORM | -        | worm      |
| ascasuum  | Ascaris suum               | WORM | -        | worm      |
| ascoimme  | Ascobolus immersus         | JGI  | jgi      | -         |
| asconigr  | Ascodesmis nigricans       | JGI  | jgi      | -         |
| ascorube  | Ascoidea rubescens         | JGI  | jgi      | -         |
| ascosarc  | Ascocoryne sarcoides       | JGI  | -        | jgi       |
| ashbgoss  | Ashbya gossypii            | JGI  | -        | jgi       |
| aspeacid  | Aspergillus acidus         | JGI  | jgi      | -         |
| aspeacul  | Aspergillus aculeatus      | JGI  | jgi      | -         |
| aspebras  | Aspergillus brasiliensis   | JGI  | jgi      | -         |
| aspecamp  | Aspergillus campestris     | JGI  | jgi      | -         |
| aspecarb  | Aspergillus carbonarius    | JGI  | jgi      | -         |
| aspeclav  | Aspergillus clavatus       | JGI  | -        | jgi       |
| aspeflav  | Aspergillus flavus         | JGI  | -        | jgi       |
| aspefumi  | Aspergillus fumigatus      | JGI  | -        | jgi       |
| aspeglau  | Aspergillus glaucus        | JGI  | -        | jgi       |
| aspekawa  | Aspergillus kawachii       | JGI  | jgi      | -         |
| aspenidu  | Aspergillus nidulans       | JGI  | -        | jgi       |
| aspenige  | Aspergillus niger          | JGI  | jgi      | -         |
| aspenovo  | Aspergillus novofumigatus  | JGI  | jgi      | -         |
| aspeochr  | Aspergillus ochraceoroseus | JGI  | jgi      | -         |
| aspeoryz  | Aspergillus oryzae         | JGI  | -        | jgi       |
| aspestey  | Aspergillus steynii        | JGI  | jgi      | -         |
| aspesydo  | Aspergillus sydowii        | JGI  | jgi      | -         |
| aspeterr  | Aspergillus terreus        | JGI  | -        | jgi       |
| aspetubi  | Aspergillus tubingensis    | JGI  | jgi      | -         |
| aspevers  | Aspergillus versicolor     | JGI  | jgi      | -         |
| aspewent  | Aspergillus wentii         | JGI  | jgi      | -         |
| aspezona  | Aspergillus zonatus        | JGI  | -        | jgi       |
| astespec  | Asterochloris spec         | JGI  | jgi      | -         |
| astymexi  | Astyanax mexicanus         | NCBI | -        | ncbi      |
| atharosa  | Athalia rosae              | INSC | -        | ncbi      |

|          |                                |      |            |                |
|----------|--------------------------------|------|------------|----------------|
| atraspec | Atractiellales spec            | JGI  | jgi        | -              |
| attaceph | Atta cephalotes                | INSC | -          | ncbi,embl      |
| aulohede | Aulographum hederiae           | JGI  | jgi        | -              |
| auralima | Aurantiochytrium limacinum     | JGI  | jgi        | -              |
| aureanop | Aureococcus anophagefferens    | JGI  | jgi        | -              |
| aurepull | Aureobasidium pullulans        | JGI  | -          | jgi            |
| aurisubg | Auricularia subglabra          | JGI  | jgi        | -              |
| aurivulg | Auriscalpium vulgare           | JGI  | jgi        | -              |
| austlimn | Austrofundulus limnaeus        | NCBI | -          | ncbi           |
| auxeprot | Auxenochlorella protothecoides | NCBI | -          | ncbi           |
| babebige | Babesia bigemina               | EMBL | embl,dbest | embl           |
| babebovi | Babesia bovis                  | EMBL | embl,dbest | embl           |
| babeequi | Babesia equi                   | EMBL | embl,dbest | embl           |
| babemicr | Babesia microti                | EUPT | embl       | eupt,embl      |
| babjinos | Babjeviella inositovora        | JGI  | jgi        | -              |
| backcirc | Backusella circina             | JGI  | jgi        | -              |
| bactcucu | Bactrocera cucurbitae          | INSC | -          | ncbi           |
| bactdors | Bactrocera dorsalis            | INSC | -          | ncbi,insc      |
| bactolea | Bactrocera oleae               | NCBI | -          | ncbi           |
| balaacut | Balaenoptera acutorostrata     | NCBI | -          | ncbi           |
| baleregu | Balearica regulorum            | NCBI | -          | ncbi           |
| batrdend | Batrachochytrium dendrobatidis | JGI  | jgi        | -              |
| baudcomp | Baudoinia compniacensis        | JGI  | jgi        | -              |
| beaubass | Beauveria bassiana             | JGI  | -          | jgi            |
| belganta | Belgica antarctica             | INSC | -          | embl,insc      |
| betavulg | Beta vulgaris                  | NCBI | -          | ncbi           |
| bigenata | Bigelowiella natans            | JGI  | jgi        | -              |
| bimunova | Bimuria novae-zelandiae        | JGI  | jgi        | -              |
| biomglab | Biomphalaria glabrata          | NCBI | -          | ncbi           |
| bisobiso | Bison bison                    | NCBI | -          | ncbi           |
| bjeradus | Bjerkandera adusta             | JGI  | jgi        | -              |
| blasaden | Blastobotrys adenivorans       | JGI  | -          | jgi            |
| blashomi | Blastocystis hominis           | EMBL | embl,dbest | embl           |
| blasspec | Blastocystis spec              | NCBI | -          | ncbi           |
| blatgerm | Blattella germanica            | INSC | insc       | -              |
| blumgram | Blumeria graminis              | JGI  | -          | jgi            |
| boecstri | Boechera stricta               | PHYT | -          | phyt           |
| boleedul | Boletus edulis                 | JGI  | jgi        | -              |
| bombimpa | Bombus impatiens               | INSC | -          | ncbi,embl      |
| bombmori | Bombyx mori                    | INSC | -          | ncbi,embl      |
| bombterr | Bombus terrestris              | NCBI | insc       | ncbi,insc      |
| bos_mutu | Bos mutus                      | NCBI | -          | ncbi           |
| bos_taur | Bos taurus                     | NCBI | -          | ncbi           |
| botrbotr | Botryobasidium botryosum       | JGI  | jgi        | -              |
| botrcine | Botrytis cinerea               | JGI  | -          | jgi            |
| botrdoth | Botryosphaeria dothidea        | JGI  | -          | jgi            |
| bracdist | Brachypodium distachyon        | PHYT | gdb,unig   | -              |
| bracstac | Brachypodium stacei            | PHYT | -          | phyt           |
| branflor | Branchiostoma floridae         | NCBI | -          | ncbi           |
| brasnapu | Brassica napus                 | NCBI | -          | ncbi           |
| brasoler | Brassica oleracea              | NCBI | -          | ncbi           |
| brasrapa | Brassica rapa                  | PHYT | gdb,unig   | -              |
| brugmala | Brugia malayi                  | WORM | -          | ncbi,embl,worm |
| brugpaha | Brugia pahangi                 | WORM | -          | worm           |

|           |                              |      |            |                |
|-----------|------------------------------|------|------------|----------------|
| brughtimo | Brugia timori                | WORM | -          | worm           |
| bubabuba  | Bubalus bubalis              | NCBI | -          | ncbi           |
| bucerhin  | Buceros rhinoceros           | NCBI | -          | ncbi           |
| bursxylo  | Bursaphelenchus xylophilus   | WORM | -          | worm           |
| bysscirc  | Bysothecium circinans        | JGI  | jgi        | -              |
| cadospec  | Cadophora spec               | JGI  | jgi        | -              |
| caenbren  | Caenorhabditis brenneri      | WORM | -          | embl,worm      |
| caenbrig  | Caenorhabditis briggsae      | WORM | -          | ncbi,embl,worm |
| caeneleg  | Caenorhabditis elegans       | WORM | -          | ncbi,embl,worm |
| caenjapo  | Caenorhabditis japonica      | WORM | -          | embl,worm      |
| caenrema  | Caenorhabditis remanei       | WORM | -          | ncbi,embl,worm |
| caliorie  | Caliciopsis orientalis       | JGI  | -          | jgi            |
| calipugn  | Calidris pugnax              | NCBI | -          | ncbi           |
| calljacc  | Callithrix jacchus           | NCBI | -          | ncbi           |
| callmili  | Callorhinchus milii          | NCBI | -          | ncbi           |
| calocorn  | Calocera cornea              | JGI  | jgi        | -              |
| calopulc  | Calosphaeria pulchella       | JGI  | -          | jgi            |
| calovisc  | Calocera viscosa             | JGI  | jgi        | -              |
| calyanna  | Calypte anna                 | NCBI | -          | ncbi           |
| camebact  | Camelus bactrianus           | NCBI | -          | ncbi           |
| camedrom  | Camelus dromedarius          | NCBI | -          | ncbi           |
| cameferu  | Camelus ferus                | NCBI | -          | ncbi           |
| comesati  | Camelina sativa              | NCBI | -          | ncbi           |
| campflor  | Camponotus floridanus        | INSC | -          | ncbi           |
| candarab  | Candida arabinofementans     | JGI  | jgi        | -              |
| candcase  | Candida caseinolytica        | JGI  | jgi        | -              |
| candtanz  | Candida tanzawaensis         | JGI  | jgi        | -              |
| candtenu  | Candida tenuis               | JGI  | jgi        | -              |
| canilup   | Canis lupus                  | NCBI | -          | ncbi           |
| capitele  | Capitella teleta             | EMBL | -          | embl           |
| caprcaro  | Caprimulgus carolinensis     | NCBI | -          | ncbi           |
| caprhir   | Capra hircus                 | NCBI | -          | ncbi           |
| capsgran  | Capsella grandiflora         | PHYT | -          | phyt           |
| capsowcz  | Capsaspora owczarzaki        | BROD | embl,dbest | embl           |
| capsrube  | Capsella rubella             | PHYT | -          | phyt           |
| caricris  | Cariama cristata             | NCBI | -          | ncbi           |
| caripapa  | Carica papaya                | PHYT | gdb        | -              |
| cateangu  | Catenaria anguillulae        | JGI  | jgi        | -              |
| caviporc  | Cavia porcellus              | NCBI | -          | ncbi           |
| cenogeop  | Cenococcum geophilum         | JGI  | jgi        | -              |
| cephalbi  | Cephaloascus albidus         | JGI  | jgi        | -              |
| cephcinc  | Cephus cinctus               | INSC | -          | ncbi           |
| cephfrag  | Cephaloascus fragrans        | JGI  | jgi        | -              |
| cerabiro  | Cerapachys biroi             | INSC | -          | ncbi           |
| ceracapi  | Ceratitidis capitata         | INSC | -          | ncbi,insc      |
| cerasimu  | Ceratotherium simum          | NCBI | -          | ncbi           |
| cerasolm  | Ceratosolen solmsi           | NCBI | -          | ncbi           |
| cercatys  | Cercocebus atys              | NCBI | -          | ncbi           |
| cerczeae  | Cercospora zeae-maydis       | JGI  | jgi        | -              |
| cerisubv  | Ceriporiopsis subvermisporea | JGI  | jgi        | -              |
| cerrunic  | Cerrena unicolor             | JGI  | jgi        | -              |
| chaeglob  | Chaetomium globosum          | JGI  | jgi        | -              |
| chaepela  | Chaetura pelagica            | NCBI | -          | ncbi           |
| challong  | Chalara longipes             | JGI  | jgi        | -              |



|           |                              |       |            |      |
|-----------|------------------------------|-------|------------|------|
| charvoci  | Charadrius vociferus         | NCBI  | -          | ncbi |
| chelmyda  | Chelonia mydas               | NCBI  | -          | ncbi |
| chenquin  | Chenopodium quinoa           | PHYT  | -          | phyt |
| chilsupp  | Chilo suppressalis           | INSC  | -          | insc |
| chinlani  | Chinchilla lanigera          | NCBI  | -          | ncbi |
| chioapob  | Chionosphaera apobasidialis  | JGI   | jgi        | -    |
| chirtent  | Chironomus tentans           | INSC  | insc       | -    |
| chlamacq  | Chlamydotis macqueenii       | NCBI  | -          | ncbi |
| chlarein  | Chlamydomonas reinhardtii    | PHYT  | gdb,unig   | -    |
| chlosaba  | Chlorocebus sabaeus          | NCBI  | -          | ncbi |
| chlovari  | Chlorella variabilis_NC64A   | JGI   | jgi,gdb    | -    |
| choiveno  | Choiromyces venosus          | JGI   | jgi        | -    |
| choncris  | Chondrus crispus             | EMBL  | embl,dbest | embl |
| chromeso  | Chroomonas mesostigmatica    | EMBL  | -          | embl |
| chroveli  | Chromera velia               | EUPT  | eupt,dbest | eupt |
| chryasia  | Chrysochloris asiatica       | NCBI  | -          | ncbi |
| chrypict  | Chrysemys picta              | NCBI  | -          | ncbi |
| cicearie  | Cicer arietinum              | NIPGR | gdb        | -    |
| cimelect  | Cimex lectularius            | INSC  | -          | ncbi |
| cioninte  | Ciona intestinalis           | NCBI  | -          | ncbi |
| citrcllem | Citrus clementina            | PHYT  | gdb        | ^    |
| citrlana  | Citrullus lanatus            | ICGUI | gdb        | -    |
| citrsine  | Citrus sinensis              | PHYT  | gdb        | -    |
| cladfulv  | Cladosporium fulvum          | JGI   | -          | jgi  |
| cladgray  | Cladonia grayi               | JGI   | jgi        | -    |
| clatelyn  | Clathrospora elyngae         | JGI   | jgi        | -    |
| clavpyxi  | Clavicornia pyxidata         | JGI   | jgi        | -    |
| clavspec  | Clavulina spec               | JGI   | jgi        | -    |
| clonsine  | Clonorchis sinensis          | WORM  | -          | worm |
| cluphare  | Clupea harengus              | NCBI  | -          | ncbi |
| coccimmi  | Coccidioides immitis         | JGI   | -          | jgi  |
| cochcarb  | Cochliobolus carbonum        | JGI   | -          | jgi  |
| cochhete  | Cochliobolus heterostrophus  | JGI   | jgi        | -    |
| cochluna  | Cochliobolus lunatus         | JGI   | jgi        | -    |
| cochmiya  | Cochliobolus miyabeanus      | JGI   | -          | jgi  |
| cochsati  | Cochliobolus sativus         | JGI   | jgi        | -    |
| cochvict  | Cochliobolus victoriae       | JGI   | -          | jgi  |
| coemreve  | Coemansia reversa            | JGI   | jgi        | -    |
| colistri  | Colius striatus              | NCBI  | -          | ncbi |
| collerem  | Colletotrichum eremochloae   | JGI   | jgi        | -    |
| collfalc  | Colletotrichum falcatum      | JGI   | jgi        | -    |
| collgram  | Colletotrichum graminicola   | JGI   | -          | jgi  |
| collhigg  | Colletotrichum higginsianum  | JGI   | -          | jgi  |
| collsome  | Colletotrichum somersetensis | JGI   | jgi        | -    |
| collsubl  | Colletotrichum sublineola    | JGI   | jgi        | -    |
| collzoys  | Colletotrichum zoysiae       | JGI   | jgi        | -    |
| coloango  | Colobus angolensis           | NCBI  | -          | ncbi |
| colulivi  | Columba livia                | NCBI  | -          | ncbi |
| condcris  | Condylura cristata           | NCBI  | -          | ncbi |
| conicoro  | Conidiobolus coronatus       | JGI   | jgi        | -    |
| conilign  | Coniochaeta ligniaria        | JGI   | jgi        | -    |
| conipute  | Coniophora puteana           | JGI   | jgi        | -    |
| conispec  | Coniochaeta spec             | JGI   | jgi        | -    |
| conithro  | Conidiobolus thromboides     | JGI   | jgi        | -    |

|          |                            |      |            |           |
|----------|----------------------------|------|------------|-----------|
| copiflor | Copidosoma floridanum      | INSC | insc       | ncbi      |
| coprcine | Coprinopsis cinerea        | JGI  | -          | jgi       |
| cordmili | Cordyceps militaris        | JGI  | -          | jgi       |
| cortglau | Cortinarius glaucopus      | JGI  | jgi        | -         |
| corvbrac | Corvus brachyrhynchos      | NCBI | -          | ncbi      |
| corvcorn | Corvus cornix              | NCBI | -          | ncbi      |
| corycass | Corynespora cassiicola     | JGI  | jgi        | -         |
| cotevest | Cotesia vestalis           | INSC | -          | insc      |
| cotujapo | Coturnix japonica          | NCBI | -          | ncbi      |
| crasgiga | Crassostrea gigas          | EMBL | -          | ncbi,embl |
| cricgris | Cricetulus griseus         | NCBI | -          | ncbi      |
| critfasc | Crithidia fasciculata      | EUPT | eupt,dbest | eupt      |
| cronquer | Cronartium quercuum        | JGI  | jgi        | -         |
| cryphomi | Cryptosporidium hominis    | EUPT | eupt,dbest | eupt      |
| crypmuri | Cryptosporidium muris      | EMBL | embl,dbest | embl      |
| crypneof | Cryptococcus neoformans    | JGI  | jgi        | -         |
| cryppara | Cryptomonas paramecium     | EMBL | -          | embl      |
| crypparf | Cryphonectria parf_asitica | JGI  | jgi        | -         |
| crypparv | Cryptosporidium parvumlowa | EUPT | dbest      | -         |
| crypvish | Cryptococcus vishniacii    | JGI  | jgi        | -         |
| cucuberb | Cucurbitaria berberidis    | JGI  | jgi        | -         |
| cucucano | Cuculus canorus            | NCBI | -          | ncbi      |
| cucumelo | Cucumis melo               | NCBI | -          | ncbi      |
| cucusati | Cucumis sativus            | PHYT | gdb        | gbk       |
| culequin | Culex quinquefasciatus     | INSC | -          | ncbi,embl |
| cyanmero | Cyanidioschyzon merolae    | NCBI | -          | ncbi      |
| cybejadi | Cyberlindnera jadinii      | JGI  | jgi        | -         |
| cyligold | Cylicostephanus goldi      | WORM | -          | worm      |
| cylitorr | Cylindrobasidium torrendii | JGI  | jgi        | -         |
| cynosemi | Cynoglossus semilaevis     | NCBI | -          | ncbi      |
| cyprvari | Cyprinodon variegatus      | NCBI | -          | ncbi      |
| cytafeli | Cytauxzoon felis           | EUPT | -          | eupt      |
| dacrspec | Dacryopinax spec           | JGI  | jgi        | -         |
| daedquer | Daedalea quercina          | JGI  | jgi        | -         |
| daldesch | Daldinia eschscholzii      | JGI  | jgi        | -         |
| danaplex | Danaus plexippus           | INSC | -          | embl      |
| danireri | Danio rerio                | NCBI | -          | ncbi      |
| daphpule | Daphnia pulex              | EMBL | -          | embl      |
| dasynove | Dasypus novemcinctus       | NCBI | -          | ncbi      |
| dauccaro | Daucus carota              | PHYT | gdb        | phyt      |
| debahans | Debaryomyces hansenii      | JGI  | -          | jgi       |
| dekkbrux | Dekkera bruxellensis       | JGI  | jgi        | -         |
| deliconf | Delitschia confertaspora   | JGI  | jgi        | -         |
| dendbisp | Dendrothele bispora        | JGI  | jgi        | -         |
| dendpond | Dendroctonus ponderosae    | INSC | insc       | embl,insc |
| diacallo | Diachasma alloeum          | NCBI | -          | ncbi      |
| diapcitr | Diaphorina citri           | INSC | -          | ncbi      |
| dichsqua | Dichomitus squalens        | JGI  | jgi        | -         |
| dictdisc | Dictyostelium discoideum   | EMBL | unig       | embl      |
| dictfasc | Dictyostelium fasciculatum | EMBL | -          | embl      |
| dictpurp | Dictyostelium purpureum    | JGI  | jgi        | -         |
| dictvivi | Dictyocaulus viviparus     | WORM | -          | worm      |
| didyexig | Didymella exigua           | JGI  | jgi        | -         |
| dinoquad | Dinoponera quadriceps      | NCBI | -          | ncbi      |

|          |                              |      |            |           |
|----------|------------------------------|------|------------|-----------|
| dioscryo | Dioszegia cryoxerica         | JGI  | jgi        | -         |
| diphlatu | Diphyllobothrium latum       | WORM | -          | worm      |
| dipoordi | Dipodomys ordii              | NCBI | -          | ncbi      |
| diroimmi | Dirofilaria immitis          | WORM | -          | worm      |
| dissacic | Dissoconium aciculare        | JGI  | jgi        | -         |
| diurnoxi | Diuraphis noxia              | NCBI | -          | ncbi      |
| dothsept | Dothistroma septosporum      | JGI  | jgi        | -         |
| dothsymp | Dothidotthia symphoricarpi   | JGI  | jgi        | -         |
| dracmedi | Dracunculus medinensis       | WORM | -          | worm      |
| drosanan | Drosophila ananassae         | INSC | insc       | ncbi,embl |
| droserec | Drosophila erecta            | INSC | insc       | ncbi,embl |
| drosgrim | Drosophila grimshawi         | INSC | insc       | ncbi,embl |
| drosmela | Drosophila melanogaster      | INSC | -          | ncbi,embl |
| drosmira | Drosophila miranda           | INSC | -          | insc      |
| drosmoja | Drosophila mojavensis        | INSC | insc       | ncbi,embl |
| drospers | Drosophila persimilis        | INSC | -          | ncbi,embl |
| drospseu | Drosophila pseudoobscura     | EMBL | insc       | ncbi,embl |
| drossech | Drosophila sechellia         | INSC | insc       | ncbi,embl |
| drossimu | Drosophila simulans          | INSC | insc       | ncbi,embl |
| drosviri | Drosophila virilis           | INSC | insc       | ncbi,embl |
| droswill | Drosophila willistoni        | INSC | insc       | ncbi,embl |
| drosyaku | Drosophila yakuba            | INSC | insc       | ncbi,embl |
| dufonova | Dufourea novaeangliae        | NCBI | -          | ncbi      |
| dunasali | Dunaliella salina            | PHYT | -          | phyt      |
| echicana | Echinococcus canadensis      | WORM | -          | worm      |
| echicapr | Echinostoma caproni          | WORM | -          | worm      |
| echigran | Echinococcus granulosus      | WORM | -          | worm      |
| echimult | Echinococcus multilocularis  | WORM | -          | worm      |
| echitelf | Echinops telfairi            | NCBI | -          | ncbi      |
| egregarz | Egretta garzetta             | NCBI | -          | ncbi      |
| eimeacer | Eimeria acervulina           | EMBL | embl,dbest | embl      |
| eimebrun | Eimeria brunetti             | EMBL | embl,dbest | embl      |
| eimemaxi | Eimeria maxima               | EMBL | embl,dbest | embl      |
| eimemiti | Eimeria mitis                | EMBL | -          | embl      |
| eimeneca | Eimeria necatrix             | EMBL | -          | embl      |
| eimeprae | Eimeria praecox              | EMBL | -          | embl      |
| eimetene | Eimeria tenella              | EMBL | embl,dbest | embl      |
| elaeelap | Elaeophora elaphi            | WORM | -          | worm      |
| elaequin | Elaeis guineensis            | NCBI | -          | ncbi      |
| elepewa  | Elephantulus edwardii        | NCBI | -          | ncbi      |
| emilhuxl | Emiliana huxleyi             | JGI  | jgi        | -         |
| encecuni | Encephalitozoon cuniculi     | JGI  | -          | jgi       |
| encehell | Encephalitozoon hellem       | JGI  | -          | jgi       |
| enceinte | Encephalitozoon intestinalis | JGI  | -          | jgi       |
| enceroma | Encephalitozoon romaleae     | JGI  | -          | jgi       |
| endomont | Endotrypanum monterogeii     | EUPT | -          | eupt      |
| entadisp | Entamoeba dispar             | EMBL | embl,dbest | embl      |
| entahist | Entamoeba histolytica        | EMBL | -          | embl      |
| entainva | Entamoeba invadens           | EMBL | -          | embl      |
| entamosh | Entamoeba moshkovskii        | EUPT | eupt,dbest | eupt      |
| entanutt | Entamoeba nuttalli           | EMBL | -          | embl      |
| enteverm | Enterobius vermicularis      | WORM | -          | worm      |
| eperfalc | Epermenia falciformis        | EUPT | -          | eupt      |
| eptefusc | Eptesicus fuscus             | NCBI | -          | ncbi      |

|          |                               |      |            |      |
|----------|-------------------------------|------|------------|------|
| equuasin | Equus asinus                  | NCBI | -          | ncbi |
| equucaba | Equus caballus                | NCBI | -          | ncbi |
| equuprze | Equus przewalskii             | NCBI | -          | ncbi |
| erembila | Eremomyces bilateralis        | JGI  | jgi        | -    |
| eremgoss | Eremothecium gossypii         | JGI  | -          | jgi  |
| erineuro | Erinaceus europaeus           | NCBI | -          | ncbi |
| erytgutt | Erythranthe guttata           | NCBI | -          | ncbi |
| erythase | Erythrobasidium hasegawianurr | JGI  | jgi        | -    |
| esoxluci | Esox lucius                   | NCBI | -          | ncbi |
| eucagran | Eucalyptus grandis            | PHYT | gdb        | gbk  |
| eurorubr | Eurotium rubrum               | JGI  | -          | jgi  |
| euryheli | Eurypyga helias               | NCBI | -          | ncbi |
| eutsals  | Eutrema salsugineum           | PHYT | -          | gbk  |
| eutylata | Eutypa lata                   | JGI  | -          | jgi  |
| exidglan | Exidia glandulosa             | JGI  | jgi        | -    |
| exobvacc | Exobasidium vaccinii          | JGI  | jgi        | -    |
| falccher | Falco cherrug                 | NCBI | -          | ncbi |
| falcpere | Falco peregrinus              | NCBI | -          | ncbi |
| faschepa | Fasciola hepatica             | WORM | -          | worm |
| felicatu | Felis catus                   | NCBI | -          | ncbi |
| fibrradi | Fibroporia radiculosa         | JGI  | -          | jgi  |
| fibuspec | Fibulorhizoctonia spec        | JGI  | jgi        | -    |
| ficealbi | Ficedula albicollis           | NCBI | -          | ncbi |
| fisthepa | Fistulina hepatica            | JGI  | -          | jgi  |
| fomimedi | Fomitiporia mediterranea      | JGI  | jgi        | -    |
| fomipini | Fomitopsis pinicola           | JGI  | jgi        | -    |
| fontalba | Fonticula alba                | EMBL | embl       | -    |
| fopiaris | Fopius arisanus               | INSC | -          | ncbi |
| fragcyli | Fragilariopsis cylindrus      | JGI  | jgi        | -    |
| fragvesc | Fragaria vesca                | PHYT | gdb        | gbk  |
| franocci | Frankliniella occidentalis    | INSC | insc       | insc |
| fukodama | Fukomys damarensis            | NCBI | -          | ncbi |
| fulmglac | Fulmarus glacialis            | NCBI | -          | ncbi |
| fundhete | Fundulus heteroclitus         | NCBI | -          | ncbi |
| fusafuji | Fusarium fujikuroi            | JGI  | -          | jgi  |
| fusagram | Fusarium graminearum          | JGI  | -          | jgi  |
| fusaoxys | Fusarium oxysporum            | JGI  | -          | jgi  |
| fusavert | Fusarium verticillioides      | JGI  | -          | jgi  |
| galdsulp | Galdieria sulphuraria         | EMBL | -          | embl |
| galemarg | Galerina marginata            | JGI  | jgi        | -    |
| galevari | Galeopterus variegatus        | NCBI | -          | ncbi |
| gallgall | Gallus gallus                 | NCBI | -          | ncbi |
| ganospec | Ganoderma spec                | JGI  | jgi        | -    |
| gavistel | Gavia stellata                | NCBI | -          | ncbi |
| gekkjapo | Gekko japonicus               | NCBI | -          | ncbi |
| geosfort | Geospiza fortis               | NCBI | -          | ncbi |
| giarinte | Giardia intestinalis          | EMBL | embl,dbest | embl |
| giarlamb | Giardia lambliaA              | EUPT | -          | embl |
| glarlozo | Glarea lozoyensis             | JGI  | -          | jgi  |
| globpall | Globodera pallida             | WORM | -          | worm |
| gloetrab | Gloeophyllum trabeum          | JGI  | jgi        | -    |
| glomacut | Glomerella acutata            | JGI  | jgi        | -    |
| glomcing | Glomerella cingulata          | JGI  | jgi        | -    |
| glonstel | Glonium stellatum             | JGI  | jgi        | -    |

|          |                                 |      |            |           |
|----------|---------------------------------|------|------------|-----------|
| glosmors | Glossina morsitans              | INSC | insc       | -         |
| glospall | Glossina pallidipes             | INSC | insc       | -         |
| glycmax_ | Glycine max                     | PHYT | gdb,unig   | -         |
| gonaprol | Gonapodya prolifera             | JGI  | jgi        | -         |
| gongpulc | Gongylonema pulchrum            | WORM | -          | worm      |
| gorigori | Gorilla gorilla                 | NCBI | -          | ncbi      |
| gossraim | Gossypium raimondii             | PHYT | gdb,unig   | -         |
| gregniph | Gregarina niphandrodes          | EMBL | embl,dbest | embl      |
| grosclav | Grosmania clavigera             | JGI  | -          | jgi       |
| guilthet | Guillardia theta                | JGI  | -          | embl      |
| guyanecr | Guyanagaster necrorhiza         | JGI  | jgi        | -         |
| gymnandr | Gymnopus androsaceus            | JGI  | jgi        | -         |
| gymnaura | Gymnascella aurantiaca          | JGI  | jgi        | -         |
| gymnchry | Gymnopilus chrysopellus         | JGI  | jgi        | -         |
| gymncitr | Gymnascella citrina             | JGI  | jgi        | -         |
| gymnluxu | Gymnopus luxurians              | JGI  | jgi        | -         |
| gyrolivi | Gyrodon lividus                 | JGI  | jgi        | -         |
| haemcont | Haemonchus contortus            | WORM | -          | worm      |
| haemplac | Haemonchus placei               | WORM | -          | worm      |
| halialbi | Haliaeetus albicilla            | NCBI | -          | ncbi      |
| halileuc | Haliaeetus leucocephalus        | NCBI | -          | ncbi      |
| halyhaly | Halyomorpha halys               | INSC | -          | ncbi      |
| hammhamm | Hammondia hammondi              | EMBL | -          | embl      |
| hanspoly | Hansenula polymorpha            | JGI  | jgi        | -         |
| hansvalb | Hanseniaspora valbyensis        | JGI  | jgi        | -         |
| haplburt | Haplochromis burtoni            | NCBI | -          | ncbi      |
| harsalt  | Harpegnathos saltator           | INSC | -          | ncbi      |
| hebecyli | Hebeloma cylindrosporum         | JGI  | jgi        | -         |
| helimelp | Heliconius melpomene            | INSC | insc       | embl,insc |
| helipoly | Heligmosomoides polygyrus       | WORM | -          | worm      |
| helorobu | Helobdella robusta              | EMBL | -          | ncbi,embl |
| hessvesi | Hesseltinella vesiculosa        | JGI  | jgi        | -         |
| heteanno | Heterobasidion annosum          | JGI  | jgi        | -         |
| hetebact | Heterorhabditis bacteriophora   | WORM | -          | worm      |
| heteglab | Heterocephalus glaber           | NCBI | -          | ncbi      |
| hetepycn | Heterogastridium pycnidioideurr | JGI  | jgi        | -         |
| histcaps | Histoplasma capsulatum          | JGI  | -          | jgi       |
| homavitr | Homalodisca vitripennis         | INSC | insc       | -         |
| homosapi | Homo sapiens                    | NCBI | -          | ncbi      |
| hyalarab | Hyaloperonospora arabidopsidis  | EMBL | -          | embl      |
| hydataen | Hydatigera taeniaeformis        | WORM | -          | worm      |
| hydnpina | Hydnomerulius pinastri          | JGI  | jgi        | -         |
| hydrvulg | Hydra vulgaris                  | NCBI | -          | ncbi      |
| hymedimi | Hymenolepis diminuta            | WORM | -          | worm      |
| hymemicr | Hymenolepis microstoma          | WORM | -          | worm      |
| hymenana | Hymenolepis nana                | WORM | -          | worm      |
| hyphburt | Hyphopichia burtonii            | JGI  | jgi        | -         |
| hyphsubl | Hypholoma sublateritium         | JGI  | jgi        | -         |
| hypohamp | Hypothenemus hampei             | INSC | insc       | -         |
| hypospec | Hypoxyton spec                  | JGI  | jgi        | -         |
| hystpuli | Hysterium pulicare              | JGI  | -          | jgi       |
| ichtmult | Ichthyophthirius multifiliis    | EMBL | embl,dbest | embl      |
| ictitrid | Ictidomys tridecemlineatus      | NCBI | -          | ncbi      |
| ilyospec | Ilyonectria spec                | JGI  | jgi        | -         |

|          |                                    |      |            |                |
|----------|------------------------------------|------|------------|----------------|
| ixodscap | <i>Ixodes scapularis</i>           | EMBL | -          | ncbi,embl      |
| jaapargi | <i>Jaapia argillacea</i>           | JGI  | jgi        | -              |
| jacujacu | <i>Jaculus jaculus</i>             | NCBI | -          | ncbi           |
| jamispec | <i>Jaminaea spec</i>               | JGI  | jgi        | -              |
| jatrcurc | <i>Jatropha curcas</i>             | NCBI | gdb        | gbk            |
| kalalaxi | <i>Kalanchoe laxiflora</i>         | PHYT | -          | phyt           |
| kalamarn | <i>Kalanchoe marnieriana</i>       | PHYT | -          | phyt           |
| karsrhod | <i>Karstenula rhodostoma</i>       | JGI  | jgi        | -              |
| kazaafri | <i>Kazachstania africana</i>       | JGI  | -          | jgi            |
| kluylact | <i>Kluyveromyces lactis</i>        | JGI  | -          | jgi            |
| laccamet | <i>Laccaria amethystina</i>        | JGI  | jgi        | -              |
| laccbico | <i>Laccaria bicolor</i>            | JGI  | jgi        | -              |
| laetsulp | <i>Laetiporus sulphureus</i>       | JGI  | jgi        | -              |
| laricroc | <i>Larimichthys crocea</i>         | NCBI | -          | ncbi           |
| latichal | <i>Latimeria chalumnae</i>         | NCBI | -          | ncbi           |
| leiospec | <i>Leiotrametes spec</i>           | JGI  | jgi        | -              |
| leisaeth | <i>Leishmania aethiopica</i>       | EUPT | -          | eupt           |
| leisarab | <i>Leishmania arabica</i>          | EUPT | -          | eupt           |
| leisbraz | <i>Leishmania braziliensis</i>     | EMBL | dbest      | -              |
| leisenri | <i>Leishmania enriettii</i>        | EUPT | -          | eupt           |
| leisgerb | <i>Leishmania gerbilli</i>         | EUPT | -          | eupt           |
| leisinfa | <i>Leishmania infantum</i>         | EMBL | dbest      | -              |
| leismajo | <i>Leishmania major</i>            | EMBL | -          | embl           |
| leismexi | <i>Leishmania mexicana</i>         | EMBL | embl,dbest | embl           |
| leispana | <i>Leishmania panamensis</i>       | EMBL | -          | embl           |
| leistrop | <i>Leishmania tropica</i>          | EUPT | -          | eupt           |
| leistura | <i>Leishmania turanica</i>         | EUPT | -          | eupt           |
| lentfluv | <i>Lentithecium fluviatile</i>     | JGI  | jgi        | -              |
| lenttigr | <i>Lentinus tigrinus</i>           | JGI  | jgi        | -              |
| lepesalm | <i>Lepeophtheirus salmonis</i>     | EMBL | -          | embl           |
| lepiocul | <i>Lepisosteus oculatus</i>        | NCBI | -          | ncbi           |
| lepipalu | <i>Lepidopterella palustris</i>    | JGI  | jgi        | -              |
| leptdece | <i>Leptinotarsa decemlineata</i>   | INSC | insc       | -              |
| leptdisc | <i>Leptosomus discolor</i>         | NCBI | -          | ncbi           |
| leptmacu | <i>Leptosphaeria maculans</i>      | JGI  | -          | jgi            |
| leptpyrr | <i>Leptomonas pyrrocoris</i>       | EUPT | -          | eupt           |
| leptspma | <i>Leptomonas spma</i>             | EUPT | -          | eupt           |
| leptwedd | <i>Leptonychotes weddellii</i>     | NCBI | -          | ncbi           |
| leucgong | <i>Leucoagaricus gongylophorus</i> | JGI  | -          | jgi            |
| leucmoll | <i>Leucogyrophana mollusca</i>     | JGI  | jgi        | -              |
| lichhyal | <i>Lichtheimia hyalospora</i>      | JGI  | jgi        | -              |
| limnluna | <i>Limnephilus lunatus</i>         | INSC | insc       | -              |
| limupoly | <i>Limulus polyphemus</i>          | NCBI | -          | ncbi           |
| lindingo | <i>Lindgomyces ingoldianus</i>     | JGI  | jgi        | -              |
| linehumi | <i>Linepithema humile</i>          | INSC | -          | ncbi           |
| linganat | <i>Lingula anatina</i>             | EMBL | -          | ncbi,embl      |
| linuusit | <i>Linum usitatissimum</i>         | PHYT | gdb        | -              |
| lipostar | <i>Lipomyces starkeyi</i>          | JGI  | jgi        | -              |
| lipovexi | <i>Lipotes vexillifer</i>          | NCBI | -          | ncbi           |
| litosigm | <i>Litomosoides sigmodontis</i>    | WORM | -          | worm           |
| loa_loa_ | <i>Loa loa</i>                     | WORM | -          | ncbi,embl,worm |
| lophmacr | <i>Lophiostoma macrostomum</i>     | JGI  | jgi        | -              |
| lophmyti | <i>Lophium mytilinum</i>           | JGI  | jgi        | -              |
| lorajunc | <i>Loramycetes juncicola</i>       | JGI  | jgi        | -              |

|           |                              |      |          |           |
|-----------|------------------------------|------|----------|-----------|
| lothspec  | Lotharella sp                | EMBL | -        | embl      |
| lottgiga  | Lottia gigantea              | EMBL | -        | ncbi,embl |
| loxoafri  | Loxodonta africana           | NCBI | -        | ncbi      |
| lucicupr  | Lucilia cuprina              | INSC | -        | embl      |
| lutzlong  | Lutzomyia longipalpis        | INSC | insc     | -         |
| macafasc  | Macaca fascicularis          | NCBI | -        | ncbi      |
| macamula  | Macaca mulatta               | NCBI | -        | ncbi      |
| macaneme  | Macaca nemestrina            | NCBI | -        | ncbi      |
| macranom  | Macroventuria anomochaeta    | JGI  | jgi      | -         |
| macrfuli  | Macrolepiota fuliginosa      | JGI  | jgi      | -         |
| macrphas  | Macrophomina phaseolina      | JGI  | -        | jgi       |
| magngris  | Magnaporthe grisea           | JGI  | -        | jgi       |
| malaglob  | Malassezia globosa           | JGI  | -        | jgi       |
| malasymp  | Malassezia sympodialis       | JGI  | jgi      | -         |
| maludome  | Malus domestica              | PHYT | gdb      | phyt      |
| manavite  | Manacus vitellinus           | NCBI | -        | ncbi      |
| mandleuc  | Mandrillus leucophaeus       | NCBI | -        | ncbi      |
| mandsext  | Manduca sexta                | INSC | insc     | insc      |
| maniescu  | Manihot esculenta            | PHYT | gdb,unig | -         |
| marafiar  | Marasmius fiardii            | JGI  | jgi      | -         |
| marcpoly  | Marchantia polymorpha        | PHYT | gdb      | phyt      |
| marmmarm  | Marmota marmota              | NCBI | -        | ncbi      |
| marsbrun  | Marssonina brunnea           | JGI  | -        | jgi       |
| martpter  | Martensiomycetes pterosporus | JGI  | jgi      | -         |
| massebur  | Massarina eburnea            | JGI  | jgi      | -         |
| mayedest  | Mayetiola destructor         | INSC | insc     | -         |
| maylzebr  | Maylandia zebra              | NCBI | -        | ncbi      |
| meditrun  | Medicago truncatula          | PHYT | gdb,unig | -         |
| megarotu  | Megachile rotundata          | INSC | -        | ncbi      |
| megascal  | Megaselia scalaris           | INSC | -        | embl      |
| meirmilt  | Meira miltonrushii           | JGI  | jgi      | -         |
| melalari  | Melampsora laricis-populina  | JGI  | jgi      | -         |
| melapulv  | Melanomma pulvis-pyrius      | JGI  | jgi      | -         |
| melaspec  | Melanconium spec             | JGI  | jgi      | -         |
| melegall  | Meleagris gallopavo          | NCBI | -        | ncbi      |
| melibico  | Meliniomyces bicolor         | JGI  | jgi      | -         |
| melicinx  | Melitaea cinxia              | INSC | -        | embl,insc |
| melivari  | Meliniomyces variabilis      | JGI  | jgi      | -         |
| meloflor  | Meloidogyne floridensis      | WORM | -        | worm      |
| melohapl  | Meloidogyne hapla            | WORM | -        | worm      |
| meloinco  | Meloidogyne incognita        | WORM | -        | worm      |
| meloundu  | Melopsittacus undulatus      | NCBI | -        | ncbi      |
| meronubi  | Merops nubicus               | NCBI | -        | ncbi      |
| mesiuinic | Mesitornis unicolor          | NCBI | -        | ncbi      |
| mesoaura  | Mesocricetus auratus         | NCBI | -        | ncbi      |
| mesocort  | Mesocestoides corti          | WORM | -        | worm      |
| metaacri  | Metarhizium acridum          | JGI  | -        | jgi       |
| metaocci  | Metaseiulus occidentalis     | NCBI | -        | ncbi      |
| metarobe  | Metarhizium robertsii        | JGI  | -        | jgi       |
| metsbicu  | Metschnikowia bicuspidata    | JGI  | jgi      | -         |
| micrcani  | Microsporum canis            | JGI  | -        | jgi       |
| micrdemo  | Microplitis demolitor        | INSC | -        | ncbi      |
| micrmuri  | Microcebus murinus           | NCBI | -        | ncbi      |
| microchr  | Microtus ochrogaster         | NCBI | -        | ncbi      |

|          |                            |      |            |           |
|----------|----------------------------|------|------------|-----------|
| microssp | Microstromatales ossp      | JGI  | jgi        | -         |
| micrpusi | Micromonas pusilla         | PHYT | jgi,unig   | -         |
| micspec  | Micromonas spec            | NCBI | -          | ncbi      |
| micrtrig | Microascus trigonosporus   | JGI  | jgi        | -         |
| mimugutt | Mimulus guttatus           | PHYT | gdb,unig   | -         |
| mixiosmu | Mixia osmundae             | JGI  | jgi        | -         |
| mnemleid | Mnemiopsis leidyi          | EMBL | -          | embl      |
| monahapt | Monacrosporium haptotylum  | JGI  | -          | jgi       |
| monapurp | Monascus purpureus         | JGI  | jgi        | -         |
| monarube | Monascus ruber             | JGI  | jgi        | -         |
| monipern | Moniliophthora perniciosa  | JGI  | -          | jgi       |
| monobrev | Monosiga brevicollis       | JGI  | jgi,embl   | -         |
| monodome | Monodelphis domestica      | NCBI | -          | ncbi      |
| mononegl | Monoraphidium neglectum    | NCBI | -          | ncbi      |
| monophar | Monomorium pharaonis       | NCBI | -          | ncbi      |
| morcconi | Morchella conica           | JGI  | jgi        | -         |
| mortelon | Mortierella elongata       | JGI  | jgi        | -         |
| morunota | Morus notabilis            | NCBI | -          | ncbi      |
| mucocirc | Mucor circinelloides       | JGI  | jgi        | -         |
| mus_musc | Mus musculus               | NCBI | -          | ncbi      |
| musaacum | Musa acuminata             | PHYT | gdb        | -         |
| muscdome | Musca domestica            | INSC | -          | ncbi,insc |
| mustputo | Mustela putorius           | NCBI | -          | ncbi      |
| mycether | Myceliophthora thermophila | JGI  | -          | jgi       |
| mycofiji | Mycosphaerella fijiensis   | JGI  | jgi        | -         |
| mycogram | Mycosphaerella graminicola | JGI  | jgi        | -         |
| myotbran | Myotis brandtii            | NCBI | -          | ncbi      |
| myotdavi | Myotis davidii             | NCBI | -          | ncbi      |
| myotluci | Myotis lucifugus           | NCBI | -          | ncbi      |
| myriduri | Myriangium duriaei         | JGI  | jgi        | -         |
| myroinun | Myrothecium inundatum      | JGI  | jgi        | -         |
| mytiresi | Mytilinidion resinicola    | JGI  | jgi        | -         |
| nadsfulv | Nadsonia fulvescens        | JGI  | jgi        | -         |
| naegfowl | Naegleria fowleri          | EUPT | -          | eupt      |
| naeggrub | Naegleria gruberi          | JGI  | jgi        | -         |
| naiaflui | Naiadella fluitans         | JGI  | jgi        | -         |
| nanngadi | Nannochloropsis gaditana   | EMBL | embl,dbest | embl      |
| nanngali | Nannospalax galili         | NCBI | -          | ncbi      |
| nasogira | Nasonia giraulti           | INSC | insc       | -         |
| nasovitr | Nasonia vitripennis        | INSC | -          | ncbi,embl |
| necaamer | Necator americanus         | WORM | -          | ncbi,worm |
| necthaem | Nectria haematococca       | JGI  | jgi        | -         |
| nelunuci | Nelumbo nucifera           | NCBI | -          | ncbi      |
| nemapari | Nematocida parisii         | JGI  | -          | jgi       |
| nemavect | Nematostella vectensis     | EMBL | -          | ncbi,embl |
| neodleco | Neodiprion lecontei        | NCBI | -          | ncbi      |
| neofparv | Neofusicoccum parvum       | JGI  | -          | jgi       |
| neolbric | Neolamprologus brichardi   | NCBI | -          | ncbi      |
| neollepi | Neolentinus lepideus       | JGI  | jgi        | -         |
| neoscani | Neospora caninum           | EUPT | eupt,dbest | eupt      |
| neofisc  | Neosartorya fischeri       | JGI  | -          | jgi       |
| nestnota | Nestor notabilis           | NCBI | -          | ncbi      |
| neurcras | Neurospora crassa          | JGI  | -          | jgi       |
| neurdisc | Neurospora discreta        | JGI  | jgi        | -         |



|          |                              |      |            |           |
|----------|------------------------------|------|------------|-----------|
| neurtetr | Neurospora tetrasperma       | JGI  | jgi        | -         |
| nicosylv | Nicotiana sylvestris         | NCBI | -          | ncbi      |
| nicotome | Nicotiana tomentosiformis    | NCBI | -          | ncbi      |
| niesexil | Niesslia exilis              | JGI  | jgi        | -         |
| nilaluge | Nilaparvata lugens           | INSC | -          | insc      |
| nippbras | Nippostrongylus brasiliensis | WORM | -          | worm      |
| nippnipp | Nipponia nippon              | NCBI | -          | ncbi      |
| nomaleuc | Nomascus leucogenys          | NCBI | -          | ncbi      |
| nothfurz | Nothobranchius furzeri       | NCBI | -          | ncbi      |
| notocori | Notothenia coriiceps         | NCBI | -          | ncbi      |
| obbarivu | Obba rivulosa                | JGI  | jgi        | -         |
| ochoprin | Ochotona princeps            | NCBI | -          | ncbi      |
| octobima | Octopus bimaculoides         | EMBL | -          | ncbi,embl |
| octodegu | Octodon degus                | NCBI | -          | ncbi      |
| odobrosm | Odobenus rosmarus            | NCBI | -          | ncbi      |
| oesodent | Oesophagostomum dentatum     | WORM | -          | worm      |
| oidimaiu | Oidiodendron maius           | JGI  | jgi        | -         |
| ompholea | Omphalotus olearius          | JGI  | -          | jgi       |
| onchflex | Onchocerca flexuosa          | WORM | -          | worm      |
| onchoche | Onchocerca ochengi           | WORM | -          | worm      |
| onchvolv | Onchocerca volvulus          | WORM | -          | embl,worm |
| oncofasc | Oncopeltus fasciatus         | INSC | insc       | insc      |
| onthtaur | Onthophagus taurus           | INSC | insc       | -         |
| ophidiss | Ophiobolus disseminans       | JGI  | jgi        | -         |
| ophipice | Ophiostoma piceae            | JGI  | -          | jgi       |
| ophipili | Ophiostoma piliferum         | JGI  | -          | jgi       |
| opishoaz | Opisthocomus hoazin          | NCBI | -          | ncbi      |
| opisvive | Opisthorchis viverrini       | WORM | -          | ncbi,worm |
| orciorca | Orcinus orca                 | NCBI | -          | ncbi      |
| oreonilo | Oreochromis niloticus        | NCBI | -          | ncbi      |
| ornianat | Ornithorhynchus anatinus     | NCBI | -          | ncbi      |
| oropthom | Oropetium thomaeum           | PHYT | -          | phyt      |
| orπισpec | Orpinomyces spec             | JGI  | -          | jgi       |
| orusabie | Orussus abietinus            | NCBI | -          | ncbi      |
| oryccuni | Oryctolagus cuniculus        | NCBI | -          | ncbi      |
| oryzbrac | Oryza brachyantha            | NCBI | -          | ncbi      |
| oryzlati | Oryzias latipes              | NCBI | -          | ncbi      |
| oryzsati | Oryza sativa                 | PHYT | gdb,unig   | -         |
| ostrluci | Ostreococcus lucimarinus     | PHYT | gdb        | gbk       |
| ostrtaur | Ostreococcus tauri           | NCBI | jgi        | -         |
| otolgarn | Otolemur garnettii           | NCBI | -          | ncbi      |
| ovisarie | Ovis aries                   | NCBI | -          | ncbi      |
| oxyttrif | Oxytricha trifallax          | EMBL | embl,dbest | embl      |
| pachtann | Pachysolen tannophilus       | JGI  | jgi        | -         |
| pachvenu | Pachypsylla venusta          | INSC | -          | insc      |
| pan_pani | Pan paniscus                 | NCBI | -          | ncbi      |
| pan_trog | Pan troglodytes              | NCBI | -          | ncbi      |
| panestip | Panellus stipticus           | JGI  | jgi        | -         |
| panihall | Panicum hallii               | PHYT | -          | phyt      |
| panivirg | Panicum virgatum             | PHYT | gdb,unig   | -         |
| panthodg | Pantholops hodgsonii         | NCBI | -          | ncbi      |
| panttigr | Panthera tigris              | NCBI | -          | ncbi      |
| panurudi | Panus rudis                  | JGI  | jgi        | -         |
| papianub | Papio anubis                 | NCBI | -          | ncbi      |

|          |                               |      |            |           |
|----------|-------------------------------|------|------------|-----------|
| papimach | Papilio machaon               | NCBI | -          | ncbi      |
| papipoly | Papilio polytes               | INSC | -          | ncbi      |
| papixuth | Papilio xuthus                | INSC | insec      | ncbi      |
| parabras | Paracoccidioides brasiliensis | JGI  | -          | jgi       |
| paraequo | Parascaris equorum            | WORM | -          | worm      |
| paraspor | Paraconiothyrium sporulosum   | JGI  | jgi        | -         |
| paratepi | Parasteatoda tepidariorum     | NCBI | -          | ncbi      |
| paratetr | Paramecium tetraurelia        | EMBL | unig       | embl      |
| paratric | Parastrongyloides trichosuri  | WORM | -          | worm      |
| parumajo | Parus major                   | NCBI | -          | ncbi      |
| pateatra | Patellaria atrata             | JGI  | jgi        | -         |
| paxiinvo | Paxillus involutus            | JGI  | jgi        | -         |
| paxirubi | Paxillus rubicundulus         | JGI  | jgi        | -         |
| pedihuma | Pediculus humanus             | INSC | insec      | ncbi,embl |
| pelecris | Pelecanus crispus             | NCBI | -          | ncbi      |
| pelosine | Pelodiscus sinensis           | NCBI | -          | ncbi      |
| penibila | Penicillium bilaiae           | JGI  | jgi        | -         |
| penibrev | Penicillium brevicompactum    | JGI  | jgi        | -         |
| penicane | Penicillium canescens         | JGI  | jgi        | -         |
| penichry | Penicillium chrysogenum       | JGI  | jgi        | -         |
| penidigi | Penicillium digitatum         | JGI  | -          | jgi       |
| peniexpa | Penicillium expansum          | JGI  | jgi        | -         |
| penifell | Penicillium fellutanum        | JGI  | jgi        | -         |
| peniglab | Penicillium glabrum           | JGI  | jgi        | -         |
| penijant | Penicillium janthinellum      | JGI  | jgi        | -         |
| penilano | Penicillium lanosocoeruleum   | JGI  | jgi        | -         |
| penioxal | Penicillium oxalicum          | JGI  | -          | jgi       |
| penirais | Penicillium raistrickii       | JGI  | jgi        | -         |
| perimacr | Periconia macrospinoso        | JGI  | jgi        | -         |
| perkmari | Perkinsus marinus             | EMBL | embl,dbest | embl      |
| peromani | Peromyscus maniculatus        | NCBI | -          | ncbi      |
| phaealeo | Phaeoacremonium aleophilum    | JGI  | -          | jgi       |
| phaeapt  | Phaethon lepturus             | NCBI | -          | ncbi      |
| phaetric | Phaeodactylum tricorutum      | JGI  | -          | embl      |
| phalcarb | Phalacrocorax carbo           | NCBI | -          | ncbi      |
| phancarn | Phanerochaete carnososa       | JGI  | jgi        | -         |
| phanchry | Phanerochaete chrysosporium   | JGI  | jgi        | -         |
| phasvulg | Phaseolus vulgaris            | PHYT | gdb,unig   | -         |
| phlebrev | Phlebia brevispora            | JGI  | jgi        | -         |
| phlegiga | Phlebiopsis gigantea          | JGI  | jgi        | -         |
| phlepapa | Phlebotomus papatasi          | INSC | insec      | -         |
| phoedact | Phoenix dactylifera           | WCMQ | -          | gbk       |
| phomtrac | Phoma tracheiphila            | JGI  | jgi        | -         |
| phyclak  | Phycomyces blakesleeanus      | JGI  | jgi        | -         |
| phylcitr | Phyllosticta citriasiana      | JGI  | jgi        | -         |
| physcato | Physeter catodon              | NCBI | -          | ncbi      |
| physpate | Physcomitrella patens         | PHYT | gdb,unig   | -         |
| phytcaps | Phytophthora capsici          | JGI  | jgi        | -         |
| phytcinn | Phytophthora cinnamomi        | JGI  | jgi        | -         |
| phytinfe | Phytophthora infestans        | EMBL | unig       | embl      |
| phytkern | Phytophthora kernoviae        | EMBL | -          | embl      |
| phytlate | Phytophthora lateralis        | EMBL | -          | embl      |
| phytpara | Phytophthora parasitica       | EMBL | embl,dbest | embl      |
| phytramo | Phytophthora ramorum          | JGI  | -          | embl      |

|          |                              |      |            |           |
|----------|------------------------------|------|------------|-----------|
| phytsoja | Phytophthora sojae           | JGI  | -          | embl      |
| pichmemb | Pichia membranifaciens       | JGI  | jgi        | -         |
| pichpast | Pichia pastoris              | JGI  | -          | jgi       |
| pichstip | Pichia stipitis              | JGI  | -          | jgi       |
| picopube | Picoides pubescens           | NCBI | -          | ncbi      |
| pedhort  | Piedraia hortae              | JGI  | jgi        | -         |
| pilocroc | Piloderma croceum            | JGI  | jgi        | -         |
| piriindi | Piriformospora indica        | JGI  | -          | jgi       |
| pirospec | Piromyces spec               | JGI  | jgi        | -         |
| pisomicr | Pisolithus microcarpus       | JGI  | jgi        | -         |
| pisotinc | Pisolithus tinctorius        | JGI  | jgi        | -         |
| plasberg | Plasmodium berghei           | EMBL | -          | embl      |
| plasbras | Plasmodiophora brassicae     | EMBL | embl,dbest | embl      |
| plashab  | Plasmodium chabaudi          | EMBL | -          | embl      |
| plascyno | Plasmodium cynomolgi         | NCBI | -          | ncbi,embl |
| plafalc  | Plasmodium falciparum        | EMBL | -          | embl      |
| plasfrag | Plasmodium fragile           | EMBL | -          | embl      |
| plagall  | Plasmodium gallinaceum       | EUPT | eupt,dbest | eupt      |
| plasinui | Plasmodium inui              | EMBL | embl,dbest | embl      |
| plasknow | Plasmodium knowlesi          | EMBL | -          | embl      |
| plasreic | Plasmodium reichenowi        | EMBL | -          | embl      |
| plavinc  | Plasmodium vinckei           | EMBL | -          | embl      |
| plaviva  | Plasmodium vivax             | EMBL | -          | embl      |
| plasyoel | Plasmodium yoelii            | EMBL | embl,dbest | embl      |
| pleosipa | Pleomassaria siparia         | JGI  | jgi        | -         |
| pleuostr | Pleurotus ostreatus          | JGI  | jgi        | -         |
| pliccris | Plicaturopsis crispa         | JGI  | jgi        | -         |
| plutxylo | Plutella xylostella          | INSC | -          | ncbi,insc |
| pneujiro | Pneumocystis jirovecii       | JGI  | -          | jgi       |
| podoanse | Podospora anserina           | JGI  | jgi        | -         |
| poecform | Poecilia formosa             | NCBI | -          | ncbi      |
| poeclati | Poecilia latipinna           | NCBI | -          | ncbi      |
| poecmexi | Poecilia mexicana            | NCBI | -          | ncbi      |
| poecreti | Poecilia reticulata          | NCBI | -          | ncbi      |
| pogobarb | Pogonomyrmex barbatus        | INSC | -          | ncbi      |
| policana | Polistes canadensis          | NCBI | -          | ncbi      |
| polidomi | Polistes dominula            | NCBI | -          | ncbi      |
| polyarcu | Polyporus arcularius         | JGI  | jgi        | -         |
| polycitr | Polychaeton citri            | JGI  | jgi        | -         |
| polyfusc | Polyplosphaeria fusca        | JGI  | jgi        | -         |
| polypall | Polysphondylium pallidum     | EMBL | embl       | embl      |
| pongabel | Pongo abelii                 | NCBI | ncbi       |           |
| popueuph | Populus euphratica           | NCBI | -          | ncbi      |
| poputric | Populus trichocarpa          | PHYT | gdb,unig   | -         |
| postplac | Postia placenta              | JGI  | jgi        | -         |
| priacaud | Priapulus caudatus           | NCBI | -          | ncbi      |
| priaserr | Priacma serrata              | INSC | -          | insc      |
| prisexsp | Pristionchus exspectatus     | WORM | -          | worm      |
| prispaci | Pristionchus pacificus       | WORM | -          | embl,worm |
| propcoqu | Propithecus coquereli        | NCBI | -          | ncbi      |
| protinou | Protomyces inouyei           | JGI  | -          | jgi       |
| protmucr | Protobothrops mucrosquamatus | NCBI | -          | ncbi      |
| protxeno | Protopolystoma xenopodis     | WORM | -          | worm      |
| prunmume | Prunus mume                  | GIGA | -          | gbk       |

|          |                                       |      |            |      |
|----------|---------------------------------------|------|------------|------|
| prunpers | <i>Prunus persica</i>                 | PHYT | gdb,unig   | -    |
| pseuanta | <i>Pseudozyma antarctica</i>          | JGI  | jgi        | -    |
| pseuelat | <i>Pseudographis elatina</i>          | JGI  | -          | jgi  |
| pseuhube | <i>Pseudozyma hubeiensis</i>          | JGI  | -          | jgi  |
| pseuhumi | <i>Pseudopodoces humilis</i>          | NCBI | -          | ncbi |
| pseuhype | <i>Pseudovirgaria hyperparasitica</i> | JGI  | jgi        | -    |
| pseumult | <i>Pseudo-nitzschia multiseriis</i>   | JGI  | jgi        | -    |
| pteralec | <i>Pteropus alecto</i>                | NCBI | -          | ncbi |
| ptergutt | <i>Pterocles gutturalis</i>           | NCBI | -          | ncbi |
| ptervamp | <i>Pteropus vampyrus</i>              | NCBI | -          | ncbi |
| puccgram | <i>Puccinia graminis</i>              | JGI  | -          | jgi  |
| puccstri | <i>Puccinia striiformis</i>           | JGI  | -          | jgi  |
| puncstri | <i>Punctularia strigosozonata</i>     | JGI  | jgi        | -    |
| pundnyer | <i>Pundamilia nyererei</i>            | NCBI | -          | ncbi |
| pycncinn | <i>Pycnopus cinnabarinus</i>          | JGI  | jgi        | -    |
| pycncocc | <i>Pycnopus coccineus</i>             | JGI  | jgi        | -    |
| pycnsang | <i>Pycnopus sanguineus</i>            | JGI  | jgi        | -    |
| pygoadel | <i>Pygoscelis adeliae</i>             | NCBI | -          | ncbi |
| pyrespec | <i>Pyrenochaeta spec</i>              | JGI  | jgi        | -    |
| pyretere | <i>Pyrenophora teres</i>              | JGI  | -          | jgi  |
| pyretrit | <i>Pyrenophora tritici-repentis</i>   | JGI  | jgi        | -    |
| pyroconf | <i>Pyronema confluens</i>             | JGI  | -          | jgi  |
| pyrubret | <i>Pyrus bretschneideri</i>           | NCBI | -          | ncbi |
| pythapha | <i>Pythium aphanidermatum</i>         | EMBL | embl,dbest | embl |
| pytharrh | <i>Pythium arrhenomanes</i>           | EMBL | -          | embl |
| pythbivi | <i>Python bivittatus</i>              | NCBI | -          | ncbi |
| pythirre | <i>Pythium irregulare</i>             | EMBL | -          | embl |
| pythiway | <i>Pythium iwayamai</i>               | EMBL | -          | embl |
| pythulti | <i>Pythium ultimum</i>                | EMBL | -          | embl |
| pythvexa | <i>Pythium vexans</i>                 | EMBL | -          | embl |
| ramarube | <i>Ramaria rubella</i>                | JGI  | jgi        | -    |
| ramavari | <i>Ramazzottius varieornatus</i>      | DDBJ | -          | ddbj |
| ramibrev | <i>Ramicandelaber brevisporus</i>     | JGI  | jgi        | -    |
| rattnorv | <i>Rattus norvegicus</i>              | NCBI | -          | ncbi |
| retifilo | <i>Reticulomyxa filosa</i>            | EMBL | embl,dbest | embl |
| rhabkr30 | <i>Rhabditophanes kr3021</i>          | WORM | -          | worm |
| rhinroxe | <i>Rhinopithecus roxellana</i>        | NCBI | -          | ncbi |
| rhizeric | <i>Rhizoscyphus ericae</i>            | JGI  | jgi        | -    |
| rhizirre | <i>Rhizophagus irregularis</i>        | JGI  | -          | jgi  |
| rhizmicr | <i>Rhizopus microsporus</i>           | JGI  | jgi        | -    |
| rhizoryz | <i>Rhizopus oryzae</i>                | JGI  | jgi        | -    |
| rhizsale | <i>Rhizopogon salebrosus</i>          | JGI  | jgi        | -    |
| rhizsola | <i>Rhizoctonia solani</i>             | JGI  | -          | jgi  |
| rhizvini | <i>Rhizopogon vinicolor</i>           | JGI  | jgi        | -    |
| rhodgram | <i>Rhodotorula graminis</i>           | JGI  | jgi        | -    |
| rhodminu | <i>Rhodotorula minuta</i>             | JGI  | jgi        | -    |
| rhodprol | <i>Rhodnius prolixus</i>              | INSC | insc       | embl |
| rhodspec | <i>Rhodotorula spec</i>               | JGI  | -          | jgi  |
| rhodtoru | <i>Rhodospiridium toruloides</i>      | JGI  | -          | jgi  |
| rhytrufu | <i>Rhytidhysterium rufulum</i>        | JGI  | -          | jgi  |
| ricicomm | <i>Ricinus communis</i>               | PHYT | gdb        | gbk  |
| rickmell | <i>Rickenella mellea</i>              | JGI  | jgi        | -    |
| romaculi | <i>Romanomermis culicivorax</i>       | WORM | -          | worm |
| rousaegy | <i>Rousettus aegyptiacus</i>          | NCBI | -          | ncbi |

|          |                               |      |            |           |
|----------|-------------------------------|------|------------|-----------|
| rozeallo | Rozella allomycis             | JGI  | jgi        | -         |
| saccere  | Saccharomyces cerevisiae      | JGI  | -          | jgi       |
| sackowa  | Saccoglossus kowalevskii      | NCBI | -          | ncbi      |
| saccprot | Saccharata proteae            | JGI  | -          | jgi       |
| saimboli | Saimiri boliviensis           | NCBI | -          | ncbi      |
| saitcomp | Saitoella complicata          | JGI  | jgi        | -         |
| salipurp | Salix purpurea                | PHYT | -          | phyt      |
| salmsala | Salmo salar                   | NCBI | -          | ncbi      |
| salprose | Salpingoeca rosetta           | EMBL | -          | embl      |
| salvmilt | Salvia miltiorrhiza           | MISC | -          | gbk       |
| saprdocl | Saprolegnia diclina           | EMBL | -          | embl      |
| saprpara | Saprolegnia parasitica        | EMBL | embl,dbest | embl      |
| sarcharr | Sarcophilus harrisii          | NCBI | -          | ncbi      |
| sarcneur | Sarcocystis neurona3          | EUPT | eupt,dbest | eupt      |
| sarcsab  | Sarcoptes scabiei             | EMBL | -          | embl      |
| sarrpurp | Sarracenia purpurea           | PHYT | -          | phyt      |
| schiaagr | Schizochytrium aggregatum     | JGI  | jgi        | -         |
| schicomm | Schizophyllum commune         | JGI  | jgi        | -         |
| schicryo | Schizosaccharomyces cryophilu | JGI  | -          | jgi       |
| schicura | Schistosoma curassoni         | WORM | -          | worm      |
| schihaem | Schistosoma haematobium       | WORM | -          | ncbi,worm |
| schijapa | Schistosoma japa_onicum       | WORM | -          | worm      |
| schijapo | Schizosaccharomyces japonicu  | JGI  | -          | jgi       |
| schimans | Schistosoma mansoni           | WORM | -          | embl,worm |
| schimarg | Schistosoma margrebowiei      | WORM | -          | worm      |
| schimatt | Schistosoma mattheei          | WORM | -          | worm      |
| schiocto | Schizosaccharomyces octospor  | JGI  | -          | jgi       |
| schipara | Schizopora paradoxa           | JGI  | jgi        | -         |
| schipomb | Schizosaccharomyces pombe     | JGI  | -          | jgi       |
| schirodh | Schistosoma rodhaini          | WORM | -          | worm      |
| schisoli | Schistocephalus solidus       | WORM | -          | worm      |
| schmmedi | Schmidtea mediterranea        | WORM | -          | worm      |
| sclecitr | Scleroderma citrinum          | JGI  | jgi        | -         |
| sclescle | Sclerotinia sclerotiorum      | JGI  | -          | jgi       |
| sebaverm | Sebacina vermifera            | JGI  | jgi        | -         |
| selamoel | Selaginella moellendorffii    | PHYT | gdb,unig   | -         |
| septmusi | Septoria musiva               | JGI  | jgi        | -         |
| septpopu | Septoria populicola           | JGI  | jgi        | -         |
| sericana | Serinus canaria               | NCBI | -          | ncbi      |
| serplacr | Serpula lacrymans             | JGI  | jgi        | -         |
| sesaindi | Sesamum indicum               | NCBI | -          | ncbi      |
| setaital | Setaria italica               | PHYT | -          | phyt      |
| setaviri | Setaria viridis               | PHYT | -          | phyt      |
| setoturc | Setosphaeria turcica          | JGI  | jgi        | -         |
| sistnive | Sistotremastrum niveocreum    | JGI  | jgi        | -         |
| sistsuec | Sistotremastrum suecicum      | JGI  | jgi        | -         |
| sobobatu | Soboliphyme baturini          | WORM | -          | worm      |
| sodialka | Sodiomyces alkalinus          | JGI  | jgi        | -         |
| solapenn | Solanum pennellii             | NCBI | -          | ncbi      |
| solatube | Solanum tuberosum             | PHYT | gdb,unig   | -         |
| soleinvi | Solenopsis invicta            | INSC | -          | ncbi,embl |
| sorearan | Sorex araneus                 | NCBI | -          | ncbi      |
| sorgbico | Sorghum bicolor               | PHYT | gdb,unig   | -         |
| spatflav | Spathularia flavida           | JGI  | -          | jgi       |

|          |                               |      |            |           |
|----------|-------------------------------|------|------------|-----------|
| spatpass | Spathaspora passalidarum      | JGI  | jgi        | -         |
| sphaarct | Sphaeroforma arctica          | NCBI | -          | ncbi      |
| sphastel | Sphaerobolus stellatus        | JGI  | jgi        | -         |
| spirerin | Spirometra erinaceiueuropaei  | WORM | -          | worm      |
| spirpoly | Spirodela polyrhiza           | PHYT | -          | phyt      |
| spirsalm | Spironucleus salmonicida      | EMBL | embl,dbest | embl      |
| spodfrug | Spodoptera frugiperda         | INSC | insc       | -         |
| sporfime | Sporormia fimetaria           | JGI  | jgi        | -         |
| sporlind | Sporobolomyces linderiae      | JGI  | jgi        | -         |
| sporreil | Sporisorium reilianum         | JGI  | -          | jgi       |
| sporrose | Sporobolomyces roseus         | JGI  | -          | jgi       |
| stagnodo | Stagonospora nodorum          | JGI  | -          | jgi       |
| stagspec | Stagonospora spec             | JGI  | jgi        | -         |
| stangris | Stanjemonium grisellum        | JGI  | jgi        | -         |
| stegmimo | Stegodyphus mimosarum         | EMBL | -          | embl      |
| stegpart | Stegastes partitus            | NCBI | -          | ncbi      |
| steicarp | Steinernema carpocapsae       | WORM | -          | worm      |
| steifelt | Steinernema feltiae           | WORM | -          | worm      |
| steiglas | Steinernema glaseri           | WORM | -          | worm      |
| steimont | Steinernema monticolum        | WORM | -          | worm      |
| steiscap | Steinernema scapterisci       | WORM | -          | worm      |
| sterhirs | Stereum hirsutum              | JGI  | jgi        | -         |
| stomcalc | Stomoxys calcitrans           | INSC | -          | ncbi      |
| strimari | Strigamia maritima            | EMBL | -          | embl      |
| stropapi | Strongyloides papillosus      | WORM | -          | worm      |
| stropurp | Strongylocentrotus purpuratus | EMBL | -          | ncbi,embl |
| storatt  | Strongyloides ratti           | WORM | -          | embl,worm |
| stroster | Strongyloides stercoralis     | WORM | -          | worm      |
| strovene | Strongyloides venezuelensis   | WORM | -          | worm      |
| strovulg | Strongylus vulgaris           | WORM | -          | worm      |
| strucame | Struthio camelus              | NCBI | -          | ncbi      |
| sturvulg | Sturnus vulgaris              | NCBI | -          | ncbi      |
| stylemn  | Stylonychia lemnae            | EMBL | embl,dbest | embl      |
| suilbrev | Suillus brevipes              | JGI  | jgi        | -         |
| suillute | Suillus luteus                | JGI  | jgi        | -         |
| sus_scro | Sus scrofa                    | NCBI | -          | ncbi      |
| symbkoch | Symbiotaphrina kochii         | JGI  | jgi        | -         |
| syphmuri | Syphacia muris                | WORM | -          | worm      |
| taenasia | Taenia asiatica               | WORM | -          | worm      |
| taengutt | Taeniopygia guttata           | NCBI | -          | ncbi      |
| taensoli | Taenia solium                 | WORM | -          | worm      |
| takirubr | Takifugu rubripes             | NCBI | -          | ncbi      |
| talaacul | Talaromyces aculeatus         | JGI  | jgi        | -         |
| talamarn | Talaromyces marneffeii        | JGI  | jgi        | -         |
| talastip | Talaromyces stipitatus        | JGI  | jgi        | -         |
| taphdefo | Taphrina deformans            | JGI  | -          | jgi       |
| tarehass | Tarenaya hassleriana          | NCBI | -          | ncbi      |
| tarssyri | Tarsius syrichta              | NCBI | -          | ncbi      |
| taureryt | Tauraco erythrolophus         | NCBI | -          | ncbi      |
| telacirc | Teladorsagia circumcincta     | WORM | -          | worm      |
| teranubi | Teratosphaeria nubilosa       | JGI  | jgi        | -         |
| terfboud | Terfezia boudieri             | JGI  | jgi        | -         |
| testcype | Testicularia cyperi           | JGI  | jgi        | -         |
| tetrther | Tetrahymena thermophila       | EMBL | unig       | -         |

|          |                              |      |            |                |
|----------|------------------------------|------|------------|----------------|
| tetrurti | Tetranychus urticae          | EMBL | -          | ncbi,embl      |
| thalocea | Thalassiosira oceanica       | EMBL | -          | embl           |
| thalpseu | Thalassiosira pseudonana     | JGI  | -          | embl           |
| thamsirt | Thamnophis sirtalis          | NCBI | -          | ncbi           |
| thectrah | Thecamonas trahens           | BROD | -          | embl           |
| theiannu | Theileria annulata           | EMBL | embl,dbest | embl           |
| theiequi | Theileria equi               | EUPT | -          | eupt           |
| theiorie | Theileria orientalis         | EMBL | embl,dbest | embl           |
| theiparv | Theileria parva              | EUPT | embl,dbest | eupt,embl      |
| thelcall | Thelazia callipaeda          | WORM | -          | worm           |
| thelkita | Thelohanellus kitauei        | EMBL | -          | embl           |
| thelmicr | Thelebolus microsporus       | JGI  | jgi        | -              |
| thelster | Thelebolus stercoreus        | JGI  | -          | jgi            |
| theocaca | Theobroma cacao              | PHYT | gdb,unig   | gbk            |
| theraura | Thermoascus aurantiacus      | JGI  | -          | jgi            |
| thieanta | Thielavia antarctica         | JGI  | jgi        | -              |
| thieappe | Thielavia appendiculata      | JGI  | jgi        | -              |
| thiearen | Thielavia arenaria           | JGI  | jgi        | -              |
| thiehyrc | Thielavia hyrcaniae          | JGI  | jgi        | -              |
| thieterr | Thielavia terrestris         | JGI  | -          | jgi            |
| thozspec | Thozetella spec              | JGI  | jgi        | -              |
| tillanom | Tilletiaria anomala          | JGI  | jgi        | -              |
| tillwash | Tilletiopsis washingtonensis | JGI  | jgi        | -              |
| tinagutt | Tinamus guttatus             | NCBI | -          | ncbi           |
| torudelb | Torulasporea delbrueckii     | JGI  | -          | jgi            |
| tothfusc | Tothia fuscella              | JGI  | jgi        | -              |
| toxocani | Toxocara canis               | WORM | -          | worm           |
| toxogond | Toxoplasma gondii            | EMBL | unig       | -              |
| tramljub | Trametes ljubarskyi          | JGI  | jgi        | -              |
| tramvers | Trametes versicolor          | JGI  | jgi        | -              |
| tremmese | Tremella mesenterica         | JGI  | jgi        | -              |
| trepert  | Trematosphaeria pertusa      | JGI  | jgi        | -              |
| tribcast | Tribolium castaneum          | INSC | insc       | ncbi,embl      |
| tricabie | Trichaptum abietinum         | JGI  | jgi        | -              |
| tricadha | Trichoplax adhaerens         | EMBL | -          | ncbi,embl      |
| tricaspe | Trichoderma asperellum       | JGI  | jgi        | -              |
| tricatro | Trichoderma atroviride       | JGI  | jgi        | -              |
| tricbisp | Trichodelitschia bisporula   | JGI  | jgi        | -              |
| tricchia | Trichosporon chiarellii      | JGI  | jgi        | -              |
| triccitr | Trichoderma citrinoviride    | JGI  | jgi        | -              |
| tricharz | Trichoderma harzianum        | JGI  | jgi        | -              |
| tricloug | Trichoderma longibrachiatum  | JGI  | jgi        | -              |
| tricmana | Trichechus manatus           | NCBI | -          | ncbi           |
| tricmats | Tricholoma matsutake         | JGI  | jgi        | -              |
| tricmuri | Trichuris muris              | WORM | -          | worm           |
| tricnati | Trichinella nativa           | WORM | -          | worm           |
| tricolea | Trichosporon oleaginosus     | JGI  | jgi        | -              |
| tricpeta | Trichomonascus petasosporus  | JGI  | jgi        | -              |
| tricpret | Trichogramma pretiosum       | INSC | -          | ncbi           |
| tricrees | Trichoderma reesei           | JGI  | -          | jgi            |
| tricrege | Trichobilharzia regenti      | WORM | -          | worm           |
| tricrubr | Trichophyton rubrum          | JGI  | -          | jgi            |
| tricspir | Trichinella spiralis         | WORM | -          | ncbi,embl,worm |
| tricsuis | Trichuris suis               | WORM | -          | worm           |

|          |                          |      |            |      |
|----------|--------------------------|------|------------|------|
| trictric | Trichuris trichiura      | WORM | -          | worm |
| tricvagi | Trichomonas vaginalis    | EMBL | embl,dbest | embl |
| tricverr | Trichophyton verrucosum  | JGI  | -          | jgi  |
| tricvire | Trichoderma virens       | JGI  | jgi        | -    |
| trifprat | Trifolium pratense       | PHYT | gdb        | phyt |
| tringuia | Trinosporium guianense   | JGI  | jgi        | -    |
| tritaest | Triticum aestivum        | PHYT | -          | phyt |
| tritspec | Tritirachium spec        | JGI  | jgi        | -    |
| trypbruc | Trypanosoma brucei       | EMBL | -          | embl |
| trypcong | Trypanosoma congolense   | EUPT | eupt       | eupt |
| trypcruz | Trypanosoma cruzi        | EMBL | embl,dbest | embl |
| trypelut | Trypethelium eluteriae   | JGI  | jgi        | -    |
| trypevan | Trypanosoma evansi       | EUPT | -          | eupt |
| trypviva | Trypanosoma vivax        | EUPT | -          | eupt |
| tubemela | Tuber melanosporum       | JGI  | jgi        | -    |
| tulacalo | Tulasnella calospora     | JGI  | jgi        | -    |
| tupachin | Tupaia chinensis         | NCBI | -          | ncbi |
| turstrun | Tursiops truncatus       | NCBI | -          | ncbi |
| tytoalba | Tyto alba                | NCBI | -          | ncbi |
| umberama | Umbelopsis ramanniana    | JGI  | jgi        | -    |
| uncirees | Uncinocarpus reesii      | JGI  | -          | jgi  |
| ursumari | Ursus maritimus          | NCBI | -          | ncbi |
| ustimayd | Ustilago maydis          | JGI  | -          | jgi  |
| ustispec | Ustilaginomycotina spec  | JGI  | jgi        | -    |
| valelaxa | Valetoniellopsis laxa    | JGI  | jgi        | -    |
| ventinae | Venturia inaequalis      | JGI  | -          | jgi  |
| verrenal | Verruculina enalia       | JGI  | jgi        | -    |
| vertalfa | Verticillium alfalfae    | JGI  | -          | jgi  |
| vertdahl | Verticillium dahliae     | JGI  | -          | jgi  |
| vicupaco | Vicugna pacos            | NCBI | -          | ncbi |
| vignradi | Vigna radiata            | NCBI | -          | ncbi |
| vitivini | Vitis vinifera           | PHYT | gdb,unig   | -    |
| vitrbas  | Vitrella brassicaformis  | EMBL | -          | embl |
| vollemer | Vollenhovia emeryi       | INSC | -          | ncbi |
| volvcart | Volvox carteri           | PHYT | gdb,unig   | -    |
| volvvolv | Volvariella volvacea     | JGI  | -          | jgi  |
| wallicht | Wallemia ichthyophaga    | JGI  | -          | jgi  |
| wallsebi | Wallemia sebi            | JGI  | jgi        | -    |
| wasmauro | Wasmannia auropunctata   | INSC | -          | ncbi |
| westorna | Westerdykella ornata     | JGI  | jgi        | -    |
| wickanom | Wickerhamomyces anomalus | JGI  | jgi        | -    |
| wilcmiko | Wilcoxina mikolae        | JGI  | jgi        | -    |
| wolfcoco | Wolfiporia cocos         | JGI  | jgi        | -    |
| wuchbanc | Wuchereria bancrofti     | WORM | -          | worm |
| xantpari | Xanthoria parietina      | JGI  | jgi        | -    |
| xenotrop | Xenopus tropicalis       | NCBI | -          | ncbi |
| xiphmacu | Xiphophorus maculatus    | NCBI | -          | ncbi |
| xyloheve | Xylona heveae            | JGI  | jgi        | -    |
| yarrlipo | Yarrowia lipolytica      | JGI  | -          | jgi  |
| zasmcell | Zasmidium cellare        | JGI  | -          | jgi  |
| zea_mays | Zea mays                 | PHYT | gdb,unig   | -    |
| zizijuju | Ziziphus jujuba          | NCBI | -          | ncbi |
| zonoalbi | Zonotrichia albicollis   | NCBI | -          | ncbi |
| zootneva | Zootermopsis nevadensis  | INSC | -          | embl |



|          |                            |      |     |      |
|----------|----------------------------|------|-----|------|
| zopfrhiz | Zopfia rhizophila          | JGI  | jgi | -    |
| zostmari | Zostera marina             | PHYT | gdb | phyt |
| zygoroux | Zygosaccharomyces rouxii   | JGI  | -   | jgi  |
| zymoarda | Zymoseptoria ardabiliae    | JGI  | -   | jgi  |
| zymopseu | Zymoseptoria pseudotritici | JGI  | -   | jgi  |

---

## Genomes

---

| Code  | Resource                         | URL                                                                                                                             |
|-------|----------------------------------|---------------------------------------------------------------------------------------------------------------------------------|
| BROD  | Broad Institute                  | <a href="https://www.broadinstitute.org/scientific-community/data">https://www.broadinstitute.org/scientific-community/data</a> |
| CGD   | Cucurbit Genomics Database       | <a href="ftp://www.icugi.org/pub/genome/watermelon/WCG/">ftp://www.icugi.org/pub/genome/watermelon/WCG/</a>                     |
| DDBJ  | DDBJ                             | <a href="http://www.ddbj.nig.ac.jp/index-j.html">http://www.ddbj.nig.ac.jp/index-j.html</a>                                     |
| EMBL  | Ensembl                          | <a href="http://www.ensembl.org/index.html">http://www.ensembl.org/index.html</a>                                               |
| EUPT  | EuPathDB                         | <a href="http://eupathdb.org/eupathdb/">http://eupathdb.org/eupathdb/</a>                                                       |
| GIGA  | GIGADB                           | <a href="https://www.ncbi.nlm.nih.gov/sra?term=SRP014658">https://www.ncbi.nlm.nih.gov/sra?term=SRP014658</a>                   |
| NCGR  | Chinese NCGR                     | <a href="http://www.bamboogdb.org/">http://www.bamboogdb.org/</a>                                                               |
| INSC  | InsectBase                       | <a href="http://www.insect-genome.com/">http://www.insect-genome.com/</a>                                                       |
| JGI   | JGI Genome Portal                | <a href="http://genome.jgi.doe.gov/">http://genome.jgi.doe.gov/</a>                                                             |
| MSC   | ?                                | <a href="ftp://danshen.ndctcm.org:10322/Salvia.scaffold.fasta">ftp://danshen.ndctcm.org:10322/Salvia.scaffold.fasta</a>         |
| NCBI  | NCBI                             | <a href="http://www.ncbi.nlm.nih.gov/">http://www.ncbi.nlm.nih.gov/</a>                                                         |
| NIPGR | Indian Institute of Plant Genome | <a href="http://http://nipgr.res.in/CGAP/download/">http://http://nipgr.res.in/CGAP/download/</a>                               |
| PHYT  | Phytozome                        | <a href="http://www.phytozome.net/">http://www.phytozome.net/</a>                                                               |
| WCMQ  | Weill Cornell Medicine-Qatar     | <a href="https://wcmq.box.com/s/kdfd0tc76oif38qvdp66vzfsyv6zvwwqh">https://wcmq.box.com/s/kdfd0tc76oif38qvdp66vzfsyv6zvwwqh</a> |
| WORM  | WormBase                         | <a href="http://www.wormbase.org/">http://www.wormbase.org/</a>                                                                 |

---

## Transcripts (experimental)

---

| Code  | Resource          | URL                                                                                     |
|-------|-------------------|-----------------------------------------------------------------------------------------|
| dbest | NCBI dbEST        | <a href="https://www.ncbi.nlm.nih.gov/dbEST/">https://www.ncbi.nlm.nih.gov/dbEST/</a>   |
| embl  | Ensembl           | <a href="http://www.ensembl.org/index.html">http://www.ensembl.org/index.html</a>       |
| eupt  | EuPathDB          | <a href="http://eupathdb.org/eupathdb/">http://eupathdb.org/eupathdb/</a>               |
| gdb   | PlantGDB          | <a href="http://www.plantgdb.org/">http://www.plantgdb.org/</a>                         |
| insec | InsectBase        | <a href="http://www.insect-genome.com/">http://www.insect-genome.com/</a>               |
| jgi   | JGI Genome Portal | <a href="http://genome.jgi.doe.gov/">http://genome.jgi.doe.gov/</a>                     |
| unig  | NCBI Unigene      | <a href="https://www.ncbi.nlm.nih.gov/unigene">https://www.ncbi.nlm.nih.gov/unigene</a> |

---

## Annotations (experimental + predicted)

---

| Code  | Resource          | URL                                                                                         |
|-------|-------------------|---------------------------------------------------------------------------------------------|
| ddbj  | DDBJ              | <a href="http://www.ddbj.nig.ac.jp/index-j.html">http://www.ddbj.nig.ac.jp/index-j.html</a> |
| embl  | Ensembl           | <a href="http://www.ensembl.org/index.html">http://www.ensembl.org/index.html</a>           |
| eupt  | EuPathDB          | <a href="http://eupathdb.org/eupathdb/">http://eupathdb.org/eupathdb/</a>                   |
| gbk   | NCBI GenBank      | <a href="https://www.ncbi.nlm.nih.gov/genbank/">https://www.ncbi.nlm.nih.gov/genbank/</a>   |
| insec | InsectBase        | <a href="http://www.insect-genome.com/">http://www.insect-genome.com/</a>                   |
| jgi   | JGI Genome Portal | <a href="http://genome.jgi.doe.gov/">http://genome.jgi.doe.gov/</a>                         |
| ncbi  | NCBI              | <a href="http://www.ncbi.nlm.nih.gov/">http://www.ncbi.nlm.nih.gov/</a>                     |
| phyt  | Phytozome         | <a href="http://www.phytozome.net/">http://www.phytozome.net/</a>                           |
| worm  | WormBase          | <a href="http://www.wormbase.org/">http://www.wormbase.org/</a>                             |

---

Supplementary Table S2. ILD Frechet model parameters

| SpecID    | taxonID | #samples | a1       | mu1       | theta1   | kappa1   | mu2       | theta2   | kappa2   | a2 | mu3 | theta3 | kappa3 | rRMSE    | AIC      | BIC      |
|-----------|---------|----------|----------|-----------|----------|----------|-----------|----------|----------|----|-----|--------|--------|----------|----------|----------|
| eimeacer  | O_Al    | 26489    | 1.00E+00 | -1.87E+02 | 4.03E+02 | 3.30E+00 |           |          |          |    |     |        |        | 2.23E-04 | 3.48E+05 | 3.48E+05 |
| metsbicu  | F_As    | 1471     | 1.00E+00 | -1.31E+00 | 7.56E+01 | 1.25E+00 |           |          |          |    |     |        |        | 2.31E-03 | 1.81E+04 | 1.81E+04 |
| neoscani  | O_Al    | 36096    | 1.00E+00 | -3.65E+03 | 4.01E+03 | 2.17E+01 |           |          |          |    |     |        |        | 2.22E-04 | 4.91E+05 | 4.91E+05 |
| nilaluge  | M_In    | 33117    | 1.00E+00 | -4.15E+02 | 1.70E+03 | 1.59E+00 |           |          |          |    |     |        |        | 5.78E-05 | 5.91E+05 | 5.91E+05 |
| pichmemt  | F_As    | 1129     | 1.00E+00 | -7.40E+00 | 9.56E+01 | 1.44E+00 |           |          |          |    |     |        |        | 2.78E-03 | 1.39E+04 | 1.40E+04 |
| pichstip  | F_As    | 2390     | 1.00E+00 | 2.79E+00  | 4.63E+01 | 1.31E+00 |           |          |          |    |     |        |        | 4.75E-03 | 2.67E+04 | 2.67E+04 |
| aaosarxi  | F_As    | 28843    | 7.40E-01 | 3.43E+01  | 1.85E+01 | 3.24E+00 | -1.37E+01 | 9.85E+01 | 1.98E+00 |    |     |        |        | 3.58E-04 | 2.52E+05 | 2.52E+05 |
| acancast  | O_Am    | 89038    | 7.60E-02 | 3.56E+00  | 4.10E+01 | 1.32E+00 | 8.77E+00  | 7.72E+01 | 3.53E+00 |    |     |        |        | 1.51E-04 | 8.89E+05 | 8.89E+05 |
| acanchlo  | M_Av    | 114782   | 1.04E-01 | 5.94E+01  | 3.86E+01 | 1.31E+00 | -1.77E+02 | 9.00E+02 | 1.39E+00 |    |     |        |        | 2.93E-05 | 1.92E+06 | 1.92E+06 |
| acancvite | M_Ne    | 80270    | 3.62E-01 | 4.26E+01  | 7.49E+01 | 1.20E+00 | -2.86E+02 | 5.05E+02 | 4.53E+00 |    |     |        |        | 8.63E-05 | 1.04E+06 | 1.04E+06 |
| acadirich | F_As    | 18147    | 7.14E-01 | 1.56E+01  | 4.05E+01 | 6.17E+00 | -5.75E+01 | 1.43E+02 | 2.64E+00 |    |     |        |        | 3.30E-04 | 1.64E+05 | 1.64E+05 |
| acrealca  | F_As    | 26256    | 4.83E-01 | 1.69E+01  | 2.71E+01 | 1.23E+00 | 1.21E+01  | 5.69E+01 | 3.81E+00 |    |     |        |        | 3.48E-04 | 2.64E+05 | 2.64E+05 |
| acrestri  | F_As    | 27220    | 8.68E-01 | 3.28E+01  | 2.29E+01 | 3.26E+00 | -2.03E+01 | 1.33E+02 | 1.72E+00 |    |     |        |        | 3.73E-04 | 2.32E+05 | 2.32E+05 |
| acrodigi  | M_Cn    | 134071   | 7.92E-02 | -8.99E+01 | 1.87E+02 | 8.81E+00 | -1.23E+02 | 6.04E+02 | 1.49E+00 |    |     |        |        | 3.34E-05 | 2.12E+06 | 2.12E+06 |
| acroechi  | M_In    | 76570    | 2.61E-01 | -5.79E+00 | 8.47E+01 | 6.37E+00 | 1.69E+01  | 3.13E+02 | 8.04E-01 |    |     |        |        | 4.88E-05 | 1.16E+06 | 1.16E+06 |
| acytsubg  | O_Am    | 22585    | 8.57E-01 | -1.15E+02 | 1.85E+02 | 1.89E+01 | -1.11E+01 | 1.18E+02 | 1.97E+00 |    |     |        |        | 3.74E-04 | 1.98E+05 | 1.98E+05 |
| agarbisp  | F_Ba    | 53380    | 8.92E-01 | -5.93E+00 | 5.83E+01 | 1.28E+01 | -4.11E+00 | 7.95E+01 | 1.48E+00 |    |     |        |        | 3.11E-04 | 3.91E+05 | 3.91E+05 |
| agarhyph  | F_Ba    | 43348    | 9.40E-01 | 4.73E+00  | 4.90E+01 | 1.20E+01 | -1.80E+01 | 8.75E+01 | 2.53E+00 |    |     |        |        | 7.01E-04 | 2.86E+05 | 2.86E+05 |
| albucaand | O_St    | 20137    | 7.73E-01 | -9.47E+01 | 1.47E+02 | 3.00E+01 | -1.14E+01 | 8.86E+01 | 1.46E+00 |    |     |        |        | 7.17E-04 | 1.68E+05 | 1.68E+05 |
| albulaib  | O_St    | 20079    | 8.84E-01 | -1.17E+02 | 1.69E+02 | 3.00E+01 | -3.57E+01 | 2.43E+02 | 1.15E+00 |    |     |        |        | 6.93E-04 | 1.64E+05 | 1.64E+05 |
| allimiss  | M_Rp    | 185851   | 1.14E-01 | 6.57E+01  | 5.49E+01 | 8.26E-01 | -1.23E+02 | 1.24E+03 | 1.01E+00 |    |     |        |        | 1.62E-05 | 3.38E+06 | 3.38E+06 |
| allisine  | M_Rp    | 181237   | 1.00E-01 | 6.63E+01  | 5.33E+01 | 8.55E-01 | -1.41E+02 | 1.24E+03 | 1.03E+00 |    |     |        |        | 1.62E-05 | 3.30E+06 | 3.30E+06 |
| altealte  | F_As    | 26981    | 7.65E-01 | 3.44E+01  | 1.66E+01 | 3.42E+00 | -2.20E+01 | 1.08E+02 | 2.21E+00 |    |     |        |        | 6.36E-04 | 2.26E+05 | 2.26E+05 |
| amanmusc  | F_Ba    | 60818    | 9.26E-02 | 3.25E+00  | 5.39E+01 | 1.37E+00 | -6.59E+01 | 1.17E+02 | 3.00E+01 |    |     |        |        | 3.24E-04 | 4.14E+05 | 4.14E+05 |
| amanthie  | F_Ba    | 78992    | 8.58E-01 | 2.80E+01  | 2.50E+01 | 4.40E+00 | -2.28E+01 | 9.56E+01 | 2.25E+00 |    |     |        |        | 3.33E-04 | 6.22E+05 | 6.22E+05 |
| amnliign  | F_As    | 29924    | 6.69E-01 | 3.13E+01  | 1.97E+01 | 4.42E+00 | -1.13E+01 | 9.01E+01 | 1.95E+00 |    |     |        |        | 3.36E-04 | 2.62E+05 | 2.62E+05 |
| amrorres  | F_As    | 20068    | 7.39E-01 | 3.55E+01  | 1.62E+01 | 2.94E+00 | -1.82E+01 | 1.08E+02 | 2.13E+00 |    |     |        |        | 4.04E-04 | 1.76E+05 | 1.76E+05 |
| amphquee  | M_Po    | 225902   | 4.80E-01 | 2.63E+01  | 2.31E+01 | 3.42E+00 | -2.35E+01 | 1.74E+02 | 1.36E+00 |    |     |        |        | 9.84E-05 | 2.61E+06 | 2.61E+06 |
| amyetran  | M_In    | 85305    | 4.08E-02 | 1.22E+01  | 6.98E+01 | 7.82E+00 | -2.67E+01 | 4.88E+02 | 1.17E+00 |    |     |        |        | 5.14E-05 | 1.38E+06 | 1.38E+06 |
| anasplat  | M_Av    | 166994   | 7.18E-02 | 5.43E+01  | 4.31E+01 | 1.83E+00 | -1.06E+02 | 9.54E+02 | 1.05E+00 |    |     |        |        | 1.82E-05 | 2.95E+06 | 2.95E+06 |
| ancycani  | M_Ne    | 156379   | 6.70E-01 | 4.48E+01  | 1.87E+01 | 1.21E+00 | -8.37E+02 | 1.28E+03 | 3.76E+00 |    |     |        |        | 2.08E-04 | 1.91E+06 | 1.91E+06 |
| anissimp  | M_Ne    | 66373    | 1.51E-01 | 3.09E+01  | 5.45E+01 | 1.35E+00 | -1.13E+02 | 3.09E+02 | 2.66E+00 |    |     |        |        | 1.23E-04 | 8.66E+05 | 8.66E+05 |
| anolcaro  | M_Rp    | 153034   | 1.10E-01 | 7.08E+01  | 5.67E+01 | 7.75E-01 | -2.19E+02 | 1.57E+03 | 1.17E+00 |    |     |        |        | 1.84E-05 | 2.80E+06 | 2.80E+06 |
| ansecygn  | M_Av    | 176868   | 8.35E-02 | 5.50E+01  | 4.36E+01 | 1.59E+00 | -7.80E+01 | 9.48E+02 | 1.03E+00 |    |     |        |        | 1.71E-05 | 3.13E+06 | 3.13E+06 |
| anthavoc  | F_As    | 36067    | 6.63E-01 | 3.75E+01  | 2.00E+01 | 2.22E+00 | -4.39E+01 | 1.29E+02 | 2.33E+00 |    |     |        |        | 3.10E-04 | 3.51E+05 | 3.51E+05 |
| antrinsu  | F_Ba    | 72711    | 8.99E-01 | 1.31E+01  | 4.11E+01 | 7.85E+00 | -2.87E+01 | 1.08E+02 | 2.16E+00 |    |     |        |        | 3.27E-04 | 5.44E+05 | 5.44E+05 |
| aotunanc  | M_Mm    | 193786   | 2.26E-01 | 6.42E+01  | 7.73E+01 | 7.08E-01 | -2.05E+02 | 1.76E+03 | 9.88E-01 |    |     |        |        | 1.85E-05 | 3.60E+06 | 3.60E+06 |
| apalvitt  | M_Av    | 108501   | 7.86E-02 | 6.42E+01  | 3.84E+01 | 1.22E+00 | -1.88E+02 | 9.32E+02 | 1.41E+00 |    |     |        |        | 2.84E-05 | 1.83E+06 | 1.83E+06 |
| aphainva  | O_St    | 50419    | 8.76E-01 | -8.74E+00 | 5.81E+01 | 9.58E+00 | -1.02E+01 | 8.69E+01 | 1.98E+00 |    |     |        |        | 3.18E-04 | 3.94E+05 | 3.94E+05 |
| apiomont  | F_As    | 31623    | 8.65E-01 | 3.87E+01  | 2.63E+01 | 1.65E+00 | -1.20E+01 | 8.70E+01 | 1.59E+00 |    |     |        |        | 2.22E-04 | 3.13E+05 | 3.13E+05 |
| aplycali  | M_Mo    | 97032    | 1.32E-02 | -2.21E+01 | 2.18E+02 | 1.08E+00 | -2.07E+01 | 9.34E+02 | 1.31E+00 |    |     |        |        | 2.87E-05 | 1.67E+06 | 1.67E+06 |
| aporcary  | F_Ba    | 80880    | 9.07E-01 | 1.64E+01  | 3.33E+01 | 7.37E+00 | -9.62E+00 | 7.38E+01 | 1.74E+00 |    |     |        |        | 3.42E-04 | 5.78E+05 | 5.78E+05 |
| apteauts  | M_Av    | 148332   | 7.69E-02 | 5.95E+01  | 4.36E+01 | 1.32E+00 | -1.28E+02 | 1.03E+03 | 1.11E+00 |    |     |        |        | 1.93E-05 | 2.62E+06 | 2.62E+06 |
| aptefors  | M_Av    | 144631   | 8.33E-02 | 5.48E+01  | 4.44E+01 | 1.59E+00 | -1.23E+02 | 9.46E+02 | 1.14E+00 |    |     |        |        | 2.04E-05 | 2.52E+06 | 2.52E+06 |
| arabhall  | P_Eu    | 107891   | 5.89E-01 | -1.94E+01 | 1.05E+02 | 9.31E+00 | -8.57E+01 | 2.60E+02 | 2.29E+00 |    |     |        |        | 1.25E-04 | 1.19E+06 | 1.19E+06 |
| arablyra  | P_Eu    | 107660   | 5.31E-01 | -3.53E+01 | 1.21E+02 | 1.11E+01 | -8.45E+01 | 2.32E+02 | 2.13E+00 |    |     |        |        | 1.28E-04 | 1.20E+06 | 1.20E+06 |
| arabthal  | P_Eu    | 117272   | 6.25E-01 | -5.29E+01 | 1.38E+02 | 1.23E+01 | -1.27E+02 | 3.03E+02 | 3.01E+00 |    |     |        |        | 1.86E-04 | 1.25E+06 | 1.25E+06 |
| aracadura | P_Eu    | 142897   | 3.96E-01 | 2.29E+01  | 6.82E+01 | 4.10E+00 | -9.26E+01 | 3.86E+02 | 1.64E+00 |    |     |        |        | 5.04E-05 | 1.91E+06 | 1.91E+06 |
| arthbenh  | F_As    | 12591    | 5.16E-01 | -1.11E+03 | 1.18E+03 | 3.00E+01 | -1.55E+02 | 2.15E+02 | 3.00E+01 |    |     |        |        | 1.21E-03 | 1.20E+05 | 1.20E+05 |
| artholig  | F_As    | 24771    | 9.23E-01 | 2.93E+01  | 3.64E+01 | 2.98E+00 | -4.38E+01 | 1.51E+02 | 2.05E+00 |    |     |        |        | 3.55E-04 | 2.24E+05 | 2.24E+05 |
| artoelg   | F_Ba    | 77163    | 8.89E-01 | 2.63E+01  | 2.88E+01 | 4.96E+00 | -2.94E+01 | 1.21E+02 | 1.87E+00 |    |     |        |        | 3.36E-04 | 6.09E+05 | 6.09E+05 |
| ascalumb  | M_Ne    | 48858    | 1.92E-02 | -1.07E+02 | 1.82E+02 | 3.91E+00 | -5.49E+02 | 1.12E+03 | 3.04E+00 |    |     |        |        | 7.30E-05 | 7.52E+06 | 7.52E+06 |
| ascasuum  | M_Ne    | 104671   | 4.54E-01 | -2.86E+03 | 3.39E+03 | 1.27E+01 | -4.48E+02 | 1.11E+03 | 2.27E+00 |    |     |        |        | 4.48E-05 | 1.62E+06 | 1.62E+06 |
| ascoimme  | F_As    | 35081    | 6.75E-01 | 3.15E+01  | 1.99E+01 | 3.17E+00 | 1.57E-01  | 8.16E+01 | 1.62E+00 |    |     |        |        | 2.95E-04 | 3.24E+05 | 3.24E+05 |
| asconigr  | F_As    | 24099    | 8.27E-01 | 3.78E+01  | 1.56E+01 | 2.11E+00 | -2.06E+01 | 1.08E+02 | 2.22E+00 |    |     |        |        | 3.14E-04 | 2.09E+05 | 2.09E+05 |
| ascorube  | F_As    | 2646     | 6.25E-01 | -2.12E-01 | 9.52E+01 | 1.08E+00 | 2.75E+01  | 5.58E+01 | 1.90E+00 |    |     |        |        | 1.67E-03 | 3.29E+04 | 3.29E+04 |
| aspeacid  | F_As    | 32438    | 8.22E-01 | 2.93E+01  | 2.69E+01 | 2.93E+00 | -2.50E+01 | 1.10E+02 | 1.76E+00 |    |     |        |        | 2.96E-04 | 2.95E+05 | 2.95E+05 |
| aspebras  | F_As    | 32666    | 8.40E-01 | 2.77E+01  | 2.89E+01 | 3.05E+00 | -2.29E+01 | 1.11E+02 | 1.71E+00 |    |     |        |        | 2.38E-04 | 2.95E+05 | 2.96E+05 |
| aspecamp  | F_As    | 24403    | 8.15E-01 | 3.28E+01  | 2.41E+01 | 2.52E+00 | 1.62E+00  | 7.37E+01 | 1.42E+00 |    |     |        |        | 3.78E-04 | 2.23E+05 | 2.23E+05 |
| aspecarb  | F_As    | 30958    | 8.16E-01 | 2.46E+01  | 3.02E+01 | 3.33E+00 | -1.52E+01 | 1.10E+02 | 1.72E+00 |    |     |        |        | 2.95E-04 | 2.82E+05 | 2.82E+05 |
| aspeclav  | F_As    | 18711    | 8.79E-01 | 2.32E+01  | 3.44E+01 | 3.65E+00 | -5.26E+01 | 1.41E+02 | 2.37E+00 |    |     |        |        | 5.76E-04 | 1.63E+05 | 1.63E+05 |
| aspeflav  | F_As    | 28332    | 5.99E-01 | 9.10E+00  | 4.65E+01 | 6.67E+00 | -5.82E+00 | 9.82E+01 | 1.53E+00 |    |     |        |        | 2.87E-04 | 2.81E+05 | 2.81E+05 |
| aspefumi  | F_As    | 18681    | 7.49E-01 | 1.71E+01  | 3.80E+01 | 4.85E+00 | -2.66E+01 | 9.81E+01 | 2.10E+00 |    |     |        |        | 6.17E-04 | 1.67E+05 | 1.67E+05 |
| aspeglav  | F_As    | 22319    | 8.30E-01 | 2.30E+01  | 3.07E+01 | 4.75E+00 | 9.52E-01  | 7.58E+01 | 1.51E+00 |    |     |        |        | 3.50E-04 | 1.86E+05 | 1.86E+05 |
| aspekawa  | F_As    | 24052    | 8.51E-01 | 1.96E+01  | 3.55E+01 | 4.42E+00 | 8.74E+00  | 7.85E+01 | 1.62E+00 |    |     |        |        | 4.47E-04 | 2.05E+05 | 2.05E+05 |
| aspenige  | F_As    | 27626    | 7.18E-01 | 2.47E+01  | 3.12E+01 | 3.67E+00 | -8.01E+00 | 8.42E+01 | 1.62E+00 |    |     |        |        | 2.68E-04 | 2.58E+05 | 2.58E+05 |
| aspenovo  | F_As    | 31549    | 2.00E-01 | 1.29E+01  | 2.64E+01 | 9.85E-01 | 3.41E+01  | 2.19E+01 | 2.35E+00 |    |     |        |        | 7.18E-04 | 2.87E+05 | 2.87E+05 |
| aspeochr  | F_As    | 23667    | 8.65E-01 | 3.43E+01  | 2.55E+01 | 2.23E+00 | -5.07E+00 | 7.71E+01 | 1.29E+00 |    |     |        |        | 3.24E-04 | 2.20E+05 | 2.20E+05 |
| aspeoryz  | F_As    | 23238    | 7.37E-01 | 2.94E+01  | 2.67E+01 | 3.38E+00 | -4.06E+00 | 8.40E+01 | 1.26E+00 |    |     |        |        | 3.28E-04 | 2.19E+05 | 2.19E+05 |
| aspestey  | F_As    | 32267    | 8.19E-01 | 2.38E+01  | 3.25E+01 | 3.59E+00 | -7.16E+00 | 8.79E+01 | 1.64E+00 |    |     |        |        | 2.51E-04 | 2.89E+05 | 2.89E+05 |
| aspesydo  | F_As    |          |          |           |          |          |           |          |          |    |     |        |        |          |          |          |

|           |      |        |          |           |          |          |           |          |          |          |          |          |
|-----------|------|--------|----------|-----------|----------|----------|-----------|----------|----------|----------|----------|----------|
| beaubass  | F_As | 17672  | 6.99E-01 | 3.28E+01  | 2.31E+01 | 2.64E+00 | -5.18E+00 | 9.07E+01 | 1.72E+00 | 4.12E-04 | 1.68E+05 | 1.68E+05 |
| belganta  | M_In | 81216  | 5.19E-01 | 5.51E+00  | 5.06E+01 | 1.13E+01 | -1.77E+01 | 1.85E+02 | 1.14E+00 | 2.49E-04 | 9.11E+05 | 9.11E+05 |
| bimunova  | F_As | 32150  | 5.90E-01 | 2.71E+01  | 2.32E+01 | 5.50E+00 | -1.58E+01 | 8.94E+01 | 2.11E+00 | 3.45E-04 | 2.90E+05 | 2.90E+05 |
| biomglab  | M_Mo | 169662 | 1.42E-01 | 7.46E+01  | 4.31E+01 | 1.23E+00 | -9.15E+01 | 7.37E+02 | 1.27E+00 | 4.05E-05 | 2.80E+06 | 2.80E+06 |
| bjeradus  | F_Ba | 80419  | 9.21E-01 | -2.00E+00 | 5.40E+01 | 1.38E+01 | -4.65E+00 | 8.16E+01 | 1.56E+00 | 4.41E-04 | 5.46E+05 | 5.46E+05 |
| blashomi  | O_St | 15625  | 8.31E-01 | 9.51E+00  | 2.07E+01 | 1.22E+01 | 1.35E+01  | 3.03E+01 | 5.75E-01 | 2.12E-03 | 8.83E+04 | 8.83E+04 |
| blatgerm  | M_In | 4280   | 1.76E-01 | 6.56E+01  | 7.37E+01 | 6.86E-01 | -5.26E+02 | 2.18E+03 | 1.37E+00 | 2.45E-04 | 7.87E+04 | 7.87E+04 |
| blumgram  | F_As | 11217  | 7.19E-01 | 2.60E+01  | 2.33E+01 | 4.86E+00 | -4.40E+01 | 1.11E+02 | 3.26E+00 | 7.77E-04 | 9.23E+04 | 9.24E+04 |
| boecstri  | P_Eu | 117223 | 5.42E-01 | -1.59E+01 | 1.03E+02 | 8.92E+00 | -1.05E+02 | 2.76E+02 | 2.28E+00 | 1.10E-04 | 1.33E+06 | 1.33E+06 |
| bombimpz  | M_In | 116318 | 4.57E-01 | -1.77E+02 | 2.53E+02 | 2.25E+01 | 1.54E+01  | 2.41E+02 | 8.65E-01 | 9.12E-05 | 1.54E+06 | 1.54E+06 |
| bombmori  | M_In | 144545 | 8.72E-02 | 5.26E+01  | 2.84E+01 | 2.16E+00 | -1.60E+02 | 7.77E+02 | 1.49E+00 | 4.06E-05 | 2.35E+06 | 2.35E+06 |
| botrbotr  | F_Ba | 86006  | 9.15E-01 | -3.63E+00 | 6.29E+01 | 9.97E+00 | -1.52E+01 | 9.32E+01 | 1.81E+00 | 3.57E-04 | 6.59E+05 | 6.59E+05 |
| botrdoth  | F_As | 34951  | 6.70E-01 | -2.66E+01 | 7.97E+01 | 1.43E+01 | -1.26E+01 | 1.10E+02 | 1.90E+00 | 6.09E-04 | 3.21E+05 | 3.21E+05 |
| branflor  | M_Ch | 167149 | 8.22E-01 | -6.35E+01 | 4.96E+02 | 1.25E+00 | -2.26E+03 | 2.69E+03 | 2.52E+01 | 2.69E-05 | 2.62E+06 | 2.62E+06 |
| brasrapa  | P_Eu | 165383 | 6.11E-01 | -2.28E+02 | 3.10E+02 | 2.82E+01 | -5.46E+01 | 2.17E+02 | 1.85E+00 | 1.11E-04 | 1.80E+06 | 1.80E+06 |
| brugmala  | M_Ne | 155898 | 3.56E-01 | 4.27E+01  | 7.61E+01 | 1.19E+00 | -3.15E+02 | 5.26E+02 | 4.74E+00 | 7.05E-05 | 2.01E+06 | 2.01E+06 |
| bucerhin  | M_Av | 106196 | 8.84E-02 | 6.42E+01  | 4.07E+01 | 1.11E+00 | -1.86E+02 | 9.38E+02 | 1.41E+00 | 2.87E-05 | 1.79E+06 | 1.79E+06 |
| cadospec  | F_As | 51045  | 6.15E-01 | 3.48E+01  | 1.59E+01 | 3.12E+00 | -1.21E+01 | 8.74E+01 | 2.19E+00 | 2.48E-04 | 4.61E+05 | 4.61E+05 |
| calorie   | F_As | 18913  | 6.22E-01 | 2.26E+01  | 3.12E+01 | 5.07E+00 | 9.88E+00  | 7.31E+01 | 1.87E+00 | 4.96E-04 | 1.73E+05 | 1.73E+05 |
| calipugn  | M_Av | 174815 | 1.04E-01 | 5.67E+01  | 4.26E+01 | 1.59E+00 | -8.98E+01 | 9.37E+02 | 1.08E+00 | 1.85E-05 | 3.05E+06 | 3.05E+06 |
| calljacc  | M_Mm | 185121 | 2.14E-01 | 6.44E+01  | 8.12E+01 | 7.00E-01 | -2.28E+02 | 1.80E+03 | 1.01E+00 | 1.84E-05 | 3.45E+06 | 3.45E+06 |
| callmili  | M_Ch | 158101 | 4.92E-02 | 5.76E+01  | 4.51E+01 | 1.94E+00 | -8.50E+01 | 8.52E+02 | 1.16E+00 | 2.14E-05 | 2.73E+06 | 2.73E+06 |
| calocorn  | F_Ba | 50367  | 8.68E-01 | 2.97E+01  | 2.08E+01 | 5.80E+00 | -1.48E+01 | 8.54E+01 | 1.96E+00 | 6.05E-04 | 3.58E+05 | 3.58E+05 |
| calopulc  | F_As | 21698  | 8.69E-01 | 3.81E+01  | 2.64E+01 | 1.73E+00 | -1.85E+02 | 4.17E+02 | 3.41E+00 | 3.11E-04 | 2.22E+05 | 2.22E+05 |
| calyanna  | M_Av | 131925 | 9.37E-02 | 5.50E+01  | 4.02E+01 | 1.74E+00 | -1.21E+02 | 8.61E+02 | 1.19E+00 | 2.44E-05 | 2.25E+06 | 2.25E+06 |
| comesati  | P_Eu | 380993 | 5.57E-01 | -1.76E+02 | 2.65E+02 | 2.29E+01 | -6.67E+00 | 1.78E+02 | 1.61E+00 | 5.72E-05 | 4.27E+06 | 4.27E+06 |
| candarab  | F_As | 1811   | 8.00E-01 | -3.21E+00 | 9.15E+01 | 1.27E+00 | -2.36E+02 | 3.09E+02 | 3.00E+01 | 2.22E-03 | 2.18E+04 | 2.19E+04 |
| candcase  | F_As | 1014   | 2.55E-01 | 1.39E+01  | 3.80E+01 | 6.06E+00 | -1.62E+00 | 7.61E+01 | 1.28E+00 | 2.13E-03 | 1.16E+04 | 1.16E+04 |
| candtanz  | F_As | 1372   | 2.24E-01 | 4.01E+01  | 7.65E+00 | 8.53E-01 | -4.68E+00 | 7.73E+01 | 1.40E+00 | 3.48E-03 | 1.59E+04 | 1.59E+04 |
| canilupu  | M_Mm | 215815 | 1.97E-01 | 6.50E+01  | 6.84E+01 | 7.36E-01 | -1.52E+02 | 1.49E+03 | 9.68E-01 | 1.71E-05 | 3.97E+06 | 3.97E+06 |
| caprcaro  | M_Av | 109525 | 8.98E-02 | 6.15E+01  | 4.23E+01 | 1.25E+00 | -2.29E+02 | 1.01E+03 | 1.49E+00 | 2.93E-05 | 1.84E+06 | 1.84E+06 |
| caprhirc  | M_Mm | 126573 | 1.65E-01 | 6.62E+01  | 6.30E+01 | 7.62E-01 | -1.94E+02 | 1.51E+03 | 1.04E+00 | 2.26E-05 | 2.32E+06 | 2.32E+06 |
| capsgran  | P_Eu | 108592 | 6.24E-01 | -1.47E+01 | 1.02E+02 | 8.59E+00 | -1.25E+02 | 3.07E+02 | 2.76E+00 | 1.43E-04 | 1.18E+06 | 1.18E+06 |
| capsowcz  | O_Op | 62842  | 8.43E-01 | -7.17E+01 | 1.63E+02 | 7.32E+00 | -5.64E+02 | 8.49E+02 | 4.26E+00 | 2.18E-04 | 6.78E+05 | 6.78E+05 |
| capsrube  | P_Eu | 115139 | 6.14E-01 | -1.24E+01 | 1.00E+02 | 8.34E+00 | -1.65E+02 | 3.45E+02 | 3.04E+00 | 1.44E-04 | 1.26E+06 | 1.26E+06 |
| caricris  | M_Av | 113945 | 8.52E-02 | 6.35E+01  | 4.11E+01 | 1.15E+00 | -2.16E+02 | 9.96E+02 | 1.44E+00 | 2.82E-05 | 1.92E+06 | 1.92E+06 |
| cateangu  | F_BI | 23330  | 8.24E-01 | -2.06E+02 | 2.80E+02 | 3.00E+01 | -3.32E+01 | 1.32E+02 | 1.68E+00 | 3.56E-04 | 2.10E+05 | 2.10E+05 |
| cephalbi  | F_As | 2744   | 5.36E-01 | -3.99E+00 | 7.14E+01 | 1.35E+00 | 4.01E+01  | 1.76E+01 | 2.31E+00 | 1.62E-03 | 2.89E+04 | 2.90E+04 |
| cephfrag  | F_As | 2495   | 5.64E-01 | -2.56E+01 | 9.69E+01 | 1.95E+00 | 3.78E+01  | 1.79E+01 | 2.98E+00 | 1.73E-03 | 2.56E+04 | 2.56E+04 |
| cerasolm  | M_In | 59021  | 2.60E-01 | -8.57E+01 | 1.62E+02 | 1.33E+01 | -5.96E+00 | 4.02E+02 | 9.25E-01 | 5.68E-05 | 9.02E+05 | 9.02E+05 |
| cercatys  | M_Mm | 231437 | 2.13E-01 | 6.43E+01  | 8.26E+01 | 6.95E-01 | -1.85E+02 | 1.83E+03 | 9.45E-01 | 1.56E-05 | 4.36E+06 | 4.36E+06 |
| cerczeae  | F_As | 15867  | 6.34E-01 | 3.17E+01  | 2.19E+01 | 3.95E+00 | -3.01E+00 | 8.21E+01 | 1.67E+00 | 3.96E-04 | 1.47E+05 | 1.47E+05 |
| cerisubv  | F_Ba | 69822  | 8.62E-01 | 7.73E+00  | 4.56E+01 | 9.59E+00 | -8.37E+00 | 8.28E+01 | 1.60E+00 | 2.69E-04 | 5.32E+05 | 5.32E+05 |
| cerrunic  | F_Ba | 68821  | 8.81E-01 | 4.18E+00  | 5.05E+01 | 9.82E+00 | -1.94E+01 | 9.53E+01 | 1.87E+00 | 3.10E-04 | 5.22E+05 | 5.22E+05 |
| chaeglob  | F_As | 22103  | 7.11E-01 | 4.24E+01  | 1.93E+01 | 1.42E+00 | -1.39E+02 | 3.13E+02 | 3.26E+00 | 3.60E-04 | 2.38E+05 | 2.38E+05 |
| chaepela  | M_Av | 130951 | 8.53E-02 | 5.58E+01  | 4.00E+01 | 1.67E+00 | -1.29E+02 | 9.05E+02 | 1.20E+00 | 2.37E-05 | 2.25E+06 | 2.25E+06 |
| charvoci  | M_Av | 134866 | 7.88E-02 | 5.68E+01  | 4.18E+01 | 1.59E+00 | -1.38E+02 | 9.47E+02 | 1.18E+00 | 2.26E-05 | 2.33E+06 | 2.33E+06 |
| chelmyda  | M_Rp | 153341 | 4.57E-02 | 6.46E+01  | 3.51E+01 | 1.36E+00 | -1.84E+02 | 1.34E+03 | 1.09E+00 | 1.70E-05 | 2.81E+06 | 2.81E+06 |
| chioapob  | F_Ba | 50790  | 6.63E-02 | 5.98E+00  | 4.71E+01 | 1.32E+00 | -3.81E+01 | 8.56E+01 | 3.00E+01 | 1.63E-03 | 3.03E+05 | 3.03E+05 |
| chirtent  | M_In | 3369   | 4.70E-01 | 3.83E+01  | 2.38E+01 | 3.52E+00 | -3.77E+00 | 2.37E+02 | 1.04E+00 | 6.16E-04 | 4.21E+04 | 4.21E+04 |
| chlamacq  | M_Av | 108508 | 8.51E-02 | 6.59E+01  | 3.97E+01 | 1.07E+00 | -2.20E+02 | 9.85E+02 | 1.47E+00 | 2.93E-05 | 1.83E+06 | 1.83E+06 |
| chlarein  | P_Ch | 133509 | 8.21E-01 | -7.52E+02 | 9.30E+02 | 1.22E+01 | 9.46E+01  | 2.09E+02 | 2.01E+00 | 8.18E-05 | 1.65E+06 | 1.65E+06 |
| chlosaba  | M_Mm | 228499 | 2.24E-01 | 6.45E+01  | 8.40E+01 | 6.89E-01 | -2.12E+02 | 1.85E+03 | 9.75E-01 | 1.64E-05 | 4.28E+06 | 4.28E+06 |
| choiveno  | F_As | 52355  | 8.71E-02 | 1.38E+01  | 3.35E+01 | 8.22E-01 | 3.69E+01  | 2.41E+01 | 1.83E+00 | 2.71E-04 | 4.94E+05 | 4.95E+05 |
| choncris  | O_Rh | 5747   | 7.06E-01 | -1.53E+02 | 2.43E+02 | 4.73E+00 | 8.46E+01  | 2.89E+01 | 1.04E+00 | 1.66E-03 | 6.57E+04 | 6.57E+04 |
| chroveli  | O_Al | 117164 | 4.40E-01 | -4.87E+01 | 3.24E+02 | 1.54E+00 | -1.52E+03 | 1.86E+03 | 1.80E+01 | 6.10E-05 | 1.61E+06 | 1.61E+06 |
| chryasia  | M_Mm | 168999 | 2.31E-01 | 6.57E+01  | 6.16E+01 | 7.18E-01 | -1.79E+02 | 1.67E+03 | 9.20E-01 | 2.05E-05 | 3.14E+06 | 3.14E+06 |
| chrypict  | M_Rp | 206988 | 5.79E-02 | 6.88E+01  | 4.06E+01 | 9.29E-01 | -1.27E+02 | 1.35E+03 | 9.83E-01 | 1.36E-05 | 3.85E+06 | 3.85E+06 |
| cioninte  | M_Ch | 112640 | 2.24E-01 | 4.56E+01  | 3.30E+01 | 7.10E-01 | -2.02E+02 | 5.13E+02 | 3.44E+00 | 8.84E-05 | 1.56E+06 | 1.56E+06 |
| clatelyn  | F_As | 24094  | 6.80E-01 | 3.30E+01  | 1.77E+01 | 4.05E+00 | -1.49E+01 | 9.42E+01 | 2.03E+00 | 3.48E-04 | 2.10E+05 | 2.10E+05 |
| clavpyxi  | F_Ba | 83550  | 8.92E-01 | 1.02E+00  | 5.21E+01 | 1.11E+01 | -1.89E+01 | 8.81E+01 | 2.02E+00 | 4.40E-04 | 6.08E+05 | 6.08E+05 |
| clavspec  | F_Ba | 74818  | 8.81E-01 | 3.15E+01  | 2.88E+01 | 3.36E+00 | -1.73E+01 | 1.04E+02 | 1.63E+00 | 2.45E-04 | 6.46E+05 | 6.46E+05 |
| cluphare  | M_Fs | 202970 | 2.15E-01 | 7.10E+01  | 6.02E+01 | 9.00E-01 | -2.29E+01 | 4.37E+02 | 1.09E+00 | 2.71E-05 | 3.19E+06 | 3.19E+06 |
| cocchimmi | F_As | 21762  | 6.78E-01 | 2.36E+01  | 3.52E+01 | 3.97E+00 | -8.75E+01 | 1.78E+02 | 3.81E+00 | 3.56E-04 | 2.04E+05 | 2.04E+05 |
| cochcarb  | F_As | 19729  | 7.16E-01 | 3.58E+01  | 1.60E+01 | 3.04E+00 | -8.90E+00 | 8.65E+01 | 1.88E+00 | 4.75E-04 | 1.72E+05 | 1.72E+05 |
| cochhete  | F_As | 18045  | 6.93E-01 | 3.66E+01  | 1.58E+01 | 2.65E+00 | -2.24E+01 | 1.03E+02 | 1.86E+00 | 4.44E-04 | 1.66E+05 | 1.66E+05 |
| cochluna  | F_As | 18180  | 7.31E-01 | 3.41E+01  | 1.80E+01 | 3.32E+00 | -7.77E+00 | 9.22E+01 | 1.78E+00 | 4.25E-04 | 1.60E+05 | 1.60E+05 |
| cochmiya  | F_As | 19542  | 7.11E-01 | 3.52E+01  | 1.67E+01 | 3.15E+00 | -1.13E+01 | 8.86E+01 | 1.93E+00 | 4.95E-04 | 1.71E+05 | 1.71E+05 |
| cochsati  | F_As | 21704  | 7.48E-01 | 3.72E+01  | 1.49E+01 | 2.65E+00 | -2.71E+01 | 1.10E+02 | 2.02E+00 | 4.47E-04 | 1.91E+05 | 1.91E+05 |
| cochvict  | F_As | 20255  | 7.09E-01 | 3.56E+01  | 1.62E+01 | 3.08E+00 | -9.16E+00 | 8.61E+01 | 1.88E+00 | 4.62E-04 | 1.77E+05 | 1.77E+05 |
| colistri  | M_Av | 106749 | 9.33E-02 | 6.10E+01  | 4.03E+01 | 1.31E+00 | -2.11E+02 | 9.66E+02 | 1.47E+00 | 3.09E-05 | 1.79E+06 | 1.79E+06 |
| collfalc  | F_As | 30537  | 7.13E-01 | 3.57E+01  | 2.32E+01 | 2.25E+00 | -1.21E+01 | 9.55E+01 | 1.83E+00 | 2.92E-04 | 2.95E+05 | 2.95E+05 |
| collgram  | F_As | 20777  | 8.05E-01 | 3.71E+01  | 2.04E+01 | 2.27E+00 | -4.11E+01 | 1.27E+02 | 2.58E+00 | 4.11E-04 | 1.88E+05 | 1.88E+05 |
| collhigg  | F_As | 23065  | 8.45E-01 | 3.79E+01  | 2.26E+01 | 1.91E+00 | -1.15E+01 | 8.15E+01 | 2.07E+00 | 3.23E-04 | 2.13E+05 | 2.13E+05 |
| collsome  | F_As | 30020  | 8.19E-01 | 3.63E+01  | 2.22E+01 | 2.16E+00 | -3.63E+01 | 1.52E+02 | 2.00E+00 | 3.22E-04 | 2.84E+05 | 2.84E+05 |
| collsubl  | F_As | 30263  | 8.25E-01 | 3.69E+01  | 2.13E+01 | 2.13E+00 | -3.47E+01 | 1.50E+02 | 1.94E+00 | 2.35E-04 | 2.85E+05 | 2.85E+05 |
| collzoys  | F_As | 31236  | 7.16E-01 | 3.56E+01  | 2.23E+01 | 2.40E+00 | -1.54E+01 | 1.02E+02 | 1.94E+00 | 2.60E-04 | 2.97E+05 | 2.97E+05 |
| coloango  | M_Mm | 196172 | 2.16E-01 | 6.        |          |          |           |          |          |          |          |          |

|           |      |        |          |           |          |          |           |          |          |          |          |          |
|-----------|------|--------|----------|-----------|----------|----------|-----------|----------|----------|----------|----------|----------|
| cotevest  | M_In | 37406  | 4.54E-01 | -7.99E-01 | 7.54E+01 | 5.65E+00 | -6.34E+01 | 4.24E+02 | 1.20E+00 | 1.21E-04 | 5.08E+05 | 5.09E+05 |
| cotujapo  | M_Av | 194026 | 1.38E-01 | 5.37E+01  | 3.92E+01 | 1.44E+00 | -3.67E+01 | 7.58E+02 | 9.98E-01 | 1.76E-05 | 3.33E+06 | 3.33E+06 |
| crasgiga  | M_Mo | 375440 | 2.75E-01 | 6.84E+01  | 6.16E+01 | 9.98E-01 | -3.23E+01 | 4.36E+02 | 1.20E+00 | 3.31E-05 | 5.74E+06 | 5.74E+06 |
| cronquer  | F_Ba | 54963  | 9.01E-01 | 8.72E+00  | 7.01E+01 | 4.36E+00 | -2.23E+01 | 1.30E+02 | 1.46E+00 | 1.46E-04 | 5.28E+05 | 5.28E+05 |
| crypmuri  | O_Al | 1428   | 7.41E-01 | 2.96E+01  | 3.49E+01 | 3.02E+00 | -4.25E+01 | 1.31E+02 | 2.53E+00 | 1.77E-03 | 1.37E+04 | 1.37E+04 |
| crypneof  | F_Ba | 34649  | 7.65E-01 | 1.32E+01  | 3.93E+01 | 7.46E+00 | 8.34E-01  | 6.43E+01 | 2.02E+00 | 3.82E-04 | 2.79E+05 | 2.79E+05 |
| crypparf  | F_As | 22429  | 7.89E-02 | -2.91E+02 | 3.32E+02 | 3.00E+01 | 3.27E+01  | 4.47E+01 | 1.74E+00 | 4.55E-04 | 2.35E+05 | 2.35E+05 |
| crypvish  | F_Ba | 37615  | 9.09E-01 | -1.11E+02 | 1.69E+02 | 2.65E+01 | -2.13E+01 | 1.06E+02 | 1.78E+00 | 4.26E-04 | 2.90E+05 | 2.90E+05 |
| cucuberb  | F_As | 23936  | 7.33E-01 | 3.35E+01  | 1.76E+01 | 3.68E+00 | -1.91E+01 | 1.01E+02 | 2.08E+00 | 4.15E-04 | 2.04E+05 | 2.04E+05 |
| cylitorr  | F_Ba | 63418  | 9.15E-01 | -4.80E+01 | 9.73E+01 | 2.88E+01 | -2.95E+01 | 9.85E+01 | 2.47E+00 | 7.11E-04 | 4.11E+05 | 4.11E+05 |
| dacrspec  | F_Ba | 45270  | 8.83E-01 | 1.27E+01  | 3.71E+01 | 1.01E+01 | -5.29E+00 | 7.54E+01 | 1.64E+00 | 5.39E-04 | 3.16E+05 | 3.16E+05 |
| daedquer  | F_Ba | 72707  | 8.99E-01 | 1.60E+01  | 3.77E+01 | 7.46E+00 | -2.27E+01 | 1.07E+02 | 1.87E+00 | 3.31E-04 | 5.44E+05 | 5.44E+05 |
| daldesch  | F_As | 48861  | 6.72E-01 | 3.54E+01  | 2.40E+01 | 2.20E+00 | -3.08E+01 | 1.54E+02 | 1.68E+00 | 1.46E-04 | 5.11E+05 | 5.11E+05 |
| danaplex  | M_In | 76123  | 1.74E-01 | 4.00E+01  | 3.46E+01 | 4.23E+00 | -3.06E+01 | 2.92E+02 | 1.32E+00 | 5.90E-05 | 1.08E+06 | 1.08E+06 |
| daphpule  | M_Ar | 107621 | 6.20E-01 | 2.62E+01  | 3.94E+01 | 4.89E+00 | -1.22E+01 | 1.59E+02 | 1.09E+00 | 9.12E-05 | 1.17E+06 | 1.17E+06 |
| dasynove  | M_Mm | 178376 | 1.87E-01 | 6.30E+01  | 6.54E+01 | 7.80E-01 | -1.45E+02 | 1.44E+03 | 9.40E-01 | 1.82E-05 | 3.29E+06 | 3.29E+06 |
| dekkbrux  | F_As | 1958   | 8.96E-01 | -1.73E+00 | 8.77E+01 | 1.12E+00 | -1.64E+01 | 8.61E+01 | 1.02E+01 | 2.14E-03 | 2.46E+04 | 2.47E+04 |
| deliconf  | F_As | 24286  | 6.80E-01 | 3.25E+01  | 1.97E+01 | 3.72E+00 | -2.56E+01 | 1.13E+02 | 2.32E+00 | 3.28E-04 | 2.17E+05 | 2.17E+05 |
| dendbisp  | F_Ba | 140679 | 7.95E-01 | 3.42E+01  | 2.13E+01 | 3.03E+00 | -2.65E+00 | 7.19E+01 | 1.36E+00 | 1.49E-04 | 1.24E+06 | 1.24E+06 |
| diacallo  | M_In | 59330  | 2.56E-01 | 6.38E-01  | 7.74E+01 | 4.47E+00 | -1.64E+01 | 7.35E+01 | 1.07E+00 | 5.90E-05 | 9.57E+05 | 9.57E+05 |
| diapcitr  | M_In | 70562  | 7.40E-01 | -6.90E+01 | 5.31E+02 | 9.98E-01 | -7.38E+02 | 1.14E+03 | 8.24E+00 | 4.71E-05 | 1.14E+06 | 1.14E+06 |
| dictfasc  | O_Am | 31406  | 5.80E-01 | -2.59E+02 | 3.34E+02 | 3.00E+01 | -3.72E+01 | 1.44E+02 | 1.59E+00 | 2.02E-04 | 3.38E+05 | 3.38E+05 |
| dictpurp  | O_Am | 17957  | 6.67E-01 | -1.70E+02 | 2.41E+02 | 3.00E+01 | -1.20E+01 | 1.21E+02 | 1.38E+00 | 2.89E-04 | 1.79E+05 | 1.79E+05 |
| dictvivi  | M_Ne | 119665 | 5.83E-01 | 4.21E+01  | 3.14E+01 | 1.05E+00 | -1.58E+02 | 5.65E+02 | 1.69E+00 | 8.51E-05 | 1.62E+06 | 1.62E+06 |
| didyexig  | F_As | 20707  | 6.83E-01 | 3.06E+01  | 1.89E+01 | 5.42E+00 | -4.79E+00 | 8.44E+01 | 1.72E+00 | 5.59E-04 | 1.76E+05 | 1.76E+05 |
| dinoquad  | M_In | 77484  | 2.72E-01 | -3.65E+01 | 1.18E+02 | 7.39E+00 | 1.51E+01  | 3.09E+02 | 8.51E-01 | 4.77E-05 | 1.17E+06 | 1.17E+06 |
| diroimmi  | M_Ne | 84919  | 5.61E-01 | 3.13E+01  | 1.12E+02 | 1.25E+00 | -3.09E+03 | 3.33E+03 | 3.00E+01 | 7.78E-05 | 1.11E+06 | 1.11E+06 |
| dissacic  | F_As | 14516  | 7.26E-01 | 3.93E+01  | 1.92E+01 | 2.12E+00 | -2.63E+01 | 1.08E+02 | 1.86E+00 | 5.16E-04 | 1.39E+05 | 1.39E+05 |
| dothsymp  | F_As | 23504  | 7.25E-01 | 3.21E+01  | 1.89E+01 | 4.25E+00 | -2.13E+01 | 1.04E+02 | 2.21E+00 | 5.05E-04 | 1.99E+05 | 1.99E+05 |
| dracmedi  | M_Ne | 45288  | 2.99E-01 | 2.94E+01  | 6.98E+01 | 1.75E+00 | -1.56E+02 | 3.70E+02 | 2.34E+00 | 1.22E-04 | 6.01E+05 | 6.02E+05 |
| dufonova  | M_In | 50932  | 4.65E-01 | -2.42E+02 | 3.17E+02 | 3.00E+01 | 9.63E+00  | 2.82E+02 | 8.74E-01 | 1.08E-04 | 6.77E+05 | 6.77E+05 |
| dunasali  | P_Ch | 106311 | 4.48E-01 | -9.41E+01 | 3.61E+02 | 1.69E+00 | -2.11E+03 | 3.42E+03 | 3.92E+00 | 4.96E-05 | 1.75E+06 | 1.75E+06 |
| egregarz  | M_Av | 130138 | 7.48E-02 | 5.77E+01  | 4.06E+01 | 1.57E+00 | -1.38E+02 | 9.49E+02 | 1.18E+00 | 2.31E-05 | 2.26E+06 | 2.26E+06 |
| eimebrun  | O_Al | 23774  | 1.41E-01 | 6.06E+01  | 8.01E+01 | 1.56E+00 | -8.21E+01 | 3.00E+02 | 2.19E+00 | 2.18E-04 | 3.18E+05 | 3.18E+05 |
| eimemaxi  | O_Al | 25102  | 3.40E-01 | 1.59E+01  | 1.45E+02 | 2.45E+00 | -2.28E+02 | 4.24E+02 | 4.00E+00 | 2.83E-04 | 3.14E+05 | 3.14E+05 |
| eimeneca  | O_Al | 26103  | 5.59E-01 | -2.07E+02 | 4.07E+02 | 3.58E+00 | 3.49E+01  | 1.38E+02 | 1.66E+00 | 2.52E-04 | 3.36E+05 | 3.36E+05 |
| elaeguin  | P_Mo | 137988 | 4.88E-01 | 5.41E+01  | 4.46E+01 | 1.54E+00 | -3.55E+02 | 1.38E+03 | 1.43E+00 | 4.15E-05 | 2.11E+06 | 2.11E+06 |
| elepедwa  | M_Mm | 165675 | 2.23E-01 | 6.47E+01  | 6.30E+01 | 7.30E-01 | -2.04E+02 | 1.68E+03 | 9.53E-01 | 2.02E-05 | 3.07E+06 | 3.07E+06 |
| emilhuxl  | O_Ha | 94482  | 2.59E-01 | -7.36E+01 | 1.45E+02 | 3.00E+01 | -3.75E+01 | 1.62E+02 | 1.90E+00 | 1.46E-04 | 1.11E+06 | 1.11E+06 |
| entadisp  | O_Am | 3169   | 5.32E-01 | -1.28E+02 | 1.80E+02 | 3.00E+01 | -4.70E+01 | 1.16E+02 | 2.84E+00 | 1.07E-03 | 2.98E+04 | 2.99E+04 |
| entahist  | O_Am | 2760   | 7.76E-01 | 1.43E+01  | 3.75E+01 | 5.25E+00 | -4.29E+01 | 1.25E+02 | 2.78E+00 | 1.59E-03 | 2.39E+04 | 2.40E+04 |
| entainva  | O_Am | 4404   | 2.11E-01 | -1.51E+02 | 1.96E+02 | 3.00E+01 | -7.66E+01 | 1.51E+02 | 3.67E+00 | 1.10E-03 | 4.64E+04 | 4.65E+04 |
| entantut  | O_Am | 1654   | 8.46E-01 | 2.26E+01  | 2.95E+01 | 4.08E+00 | -3.60E+01 | 1.28E+02 | 2.74E+00 | 1.86E-03 | 1.39E+04 | 1.40E+04 |
| erembila  | F_As | 22136  | 7.40E-01 | 3.18E+01  | 1.98E+01 | 3.82E+00 | -1.18E+01 | 9.33E+01 | 1.93E+00 | 5.30E-04 | 1.90E+05 | 1.90E+05 |
| erytgutt  | P_Eu | 118176 | 5.52E-01 | 1.66E+01  | 7.60E+01 | 4.50E+00 | -1.99E+02 | 5.15E+02 | 2.32E+00 | 7.55E-05 | 1.47E+06 | 1.47E+06 |
| erythase  | F_Ba | 87710  | 9.41E-01 | 3.14E+00  | 5.33E+01 | 8.92E+00 | -7.79E+01 | 1.60E+02 | 3.75E+00 | 3.36E-04 | 6.43E+05 | 6.43E+05 |
| eurorubr  | F_As | 20390  | 8.43E-01 | 2.69E+01  | 2.65E+01 | 4.08E+00 | -1.28E+01 | 8.37E+01 | 1.62E+00 | 4.04E-04 | 1.70E+05 | 1.70E+05 |
| euryheli  | M_Av | 106348 | 8.81E-02 | 6.22E+01  | 4.30E+01 | 1.15E+00 | -2.18E+02 | 9.88E+02 | 1.47E+00 | 2.98E-05 | 1.79E+06 | 1.79E+06 |
| eutrsals  | P_Eu | 114356 | 5.81E-01 | -2.91E+01 | 1.17E+02 | 9.74E+00 | -1.62E+02 | 3.34E+02 | 2.87E+00 | 1.21E-04 | 1.27E+06 | 1.27E+06 |
| eutyлата  | F_As | 21869  | 4.78E-01 | 1.92E+01  | 4.07E+01 | 4.30E+00 | -1.37E+01 | 1.21E+02 | 2.27E+00 | 3.36E-04 | 2.29E+05 | 2.29E+05 |
| exidglan  | F_Ba | 111811 | 8.97E-01 | -4.23E+01 | 9.34E+01 | 1.97E+01 | -3.37E+00 | 8.40E+01 | 1.27E+00 | 2.31E-04 | 8.27E+05 | 8.27E+05 |
| exobvacc  | F_Ba | 15411  | 8.69E-01 | -1.20E+02 | 1.91E+02 | 1.85E+01 | -2.33E+01 | 1.06E+02 | 1.70E+00 | 4.32E-04 | 1.36E+05 | 1.36E+05 |
| falccher  | M_Av | 146835 | 1.01E-01 | 5.86E+01  | 4.07E+01 | 1.32E+00 | -1.21E+02 | 9.28E+02 | 1.17E+00 | 2.10E-05 | 2.53E+06 | 2.53E+06 |
| falcperre | M_Av | 149246 | 1.01E-01 | 5.73E+01  | 4.07E+01 | 1.41E+00 | -1.23E+02 | 9.21E+02 | 1.16E+00 | 2.07E-05 | 2.57E+06 | 2.57E+06 |
| fibrradi  | F_Ba | 50573  | 9.18E-01 | -3.00E+01 | 8.32E+01 | 1.81E+01 | 1.42E+01  | 5.69E+01 | 1.05E+00 | 4.59E-04 | 3.60E+05 | 3.60E+05 |
| fibsuspec | F_Ba | 152277 | 8.08E-01 | 1.10E+01  | 4.25E+01 | 8.82E+00 | 7.31E-01  | 6.52E+01 | 1.27E+00 | 2.51E-04 | 1.01E+06 | 1.01E+06 |
| fisthepa  | F_Ba | 52471  | 7.48E-01 | -4.49E+00 | 5.75E+01 | 1.20E+01 | -1.91E+01 | 8.75E+01 | 2.03E+00 | 3.43E-04 | 4.33E+05 | 4.33E+05 |
| fomimedi  | F_Ba | 63748  | 8.63E-01 | 2.82E+01  | 2.74E+01 | 4.25E+00 | -9.44E+00 | 9.26E+01 | 1.57E+00 | 2.24E-04 | 5.25E+05 | 5.25E+05 |
| fomipini  | F_Ba | 72794  | 8.64E-01 | -9.27E+00 | 6.26E+01 | 1.32E+01 | -3.76E+00 | 8.40E+01 | 1.39E+00 | 2.74E-04 | 5.58E+05 | 5.58E+05 |
| fontalba  | O_Op | 44190  | 8.53E-01 | -4.36E+02 | 5.67E+02 | 1.37E+01 | -3.99E+01 | 2.46E+02 | 1.25E+00 | 1.93E-04 | 5.11E+05 | 5.11E+05 |
| fopiaris  | M_In | 55479  | 3.00E-01 | -3.39E+02 | 4.11E+02 | 3.00E+01 | 3.71E+01  | 2.30E+02 | 8.27E-01 | 7.06E-05 | 8.02E+05 | 8.02E+05 |
| fragcyli  | O_St | 2971   | 4.43E-03 | 3.16E+01  | 3.13E+01 | 9.27E-01 | -8.42E-01 | 1.46E+02 | 3.00E+00 | 8.80E-04 | 3.37E+04 | 3.37E+04 |
| fragvesc  | P_Eu | 131193 | 4.54E-01 | 3.75E+01  | 5.58E+01 | 3.30E+00 | -1.39E+02 | 4.27E+02 | 1.80E+00 | 6.04E-05 | 1.71E+06 | 1.71E+06 |
| franocci  | M_In | 16192  | 7.28E-01 | 1.56E+01  | 6.68E+01 | 7.02E+00 | -8.02E+00 | 2.01E+02 | 1.07E+00 | 2.96E-04 | 1.69E+05 | 1.69E+05 |
| fulmglac  | M_Av | 112319 | 7.96E-02 | 6.52E+01  | 3.81E+01 | 1.13E+00 | -2.29E+02 | 1.01E+03 | 1.47E+00 | 2.90E-05 | 1.89E+06 | 1.89E+06 |
| galdsulp  | P_Ba | 27350  | 9.31E-01 | -7.46E+01 | 1.24E+02 | 3.00E+01 | 1.49E+01  | 3.85E+01 | 1.58E+00 | 1.07E-03 | 1.79E+05 | 1.79E+05 |
| gallgall  | M_Av | 207335 | 1.37E-01 | 5.13E+01  | 4.08E+01 | 1.63E+00 | -5.21E+01 | 7.93E+02 | 1.01E+00 | 1.79E-05 | 3.56E+06 | 3.56E+06 |
| ganospec  | F_Ba | 86149  | 8.54E-01 | 2.95E+01  | 2.72E+01 | 3.89E+00 | -1.80E+01 | 1.18E+02 | 1.61E+00 | 2.19E-04 | 7.35E+05 | 7.35E+05 |
| gavistel  | M_Av | 107461 | 7.00E-02 | 6.55E+01  | 3.68E+01 | 1.19E+00 | -2.33E+02 | 1.02E+03 | 1.49E+00 | 2.87E-05 | 1.81E+06 | 1.82E+06 |
| gekkjapo  | M_Rp | 164626 | 9.71E-02 | 7.07E+01  | 6.25E+01 | 7.44E-01 | -4.20E+02 | 1.99E+03 | 1.33E+00 | 1.75E-05 | 3.04E+06 | 3.04E+06 |
| geosfort  | M_Av | 133414 | 8.70E-02 | 5.52E+01  | 3.77E+01 | 1.73E+00 | -1.21E+02 | 8.53E+02 | 1.19E+00 | 2.51E-05 | 2.28E+06 | 2.28E+06 |
| globpall  | M_Ne | 112993 | 3.73E-01 | -1.65E+02 | 2.16E+02 | 3.00E+01 | -9.87E+00 | 1.33E+02 | 1.62E+00 | 2.32E-04 | 1.30E+06 | 1.30E+06 |
| gloetrab  | F_Ba | 57173  | 8.68E-01 | -2.07E+01 | 7.40E+01 | 1.62E+01 | -1.14E+01 | 8.44E+01 | 1.66E+00 | 3.21E-04 | 4.27E+05 | 4.27E+05 |
| glomacut  | F_As | 30887  | 7.50E-01 | 3.39E+01  | 2.33E+01 | 2.88E+00 | -6.22E+00 | 8.88E+01 | 1.71E+00 | 2.47E-04 | 2.83E+05 | 2.83E+05 |
| glomcing  | F_As | 36627  | 7.38E-01 | 2.96E+01  | 2.44E+01 | 4.01E+00 | -3.56E+00 | 8.64E+01 | 1.62E+00 | 2.65E-04 | 3.25E+05 | 3.25E+05 |
| glonstel  | F_As | 32878  | 6.77E-01 | 3.21E+01  | 2.13E+01 | 3.50E+00 | -1.95E+01 | 9.92E+01 | 2.18E+00 | 2.87E-04 | 2.97E+05 | 2.97E+05 |
| gonaprol  | F_Ch | 80319  | 8.07E-01 | 2.26E+01  | 4.07E+01 | 4.86E+00 | -9.79E+01 | 2.08E+02 | 2.98E+00 | 2.32E-04 | 7.24E+05 | 7.24E+05 |
| gongpulp  | M_Ne | 58848  | 2.2      |           |          |          |           |          |          |          |          |          |

|           |      |        |          |           |          |          |           |          |          |          |          |          |
|-----------|------|--------|----------|-----------|----------|----------|-----------|----------|----------|----------|----------|----------|
| halileuc  | M_Av | 162353 | 1.12E-01 | 5.74E+01  | 4.00E+01 | 1.46E+00 | -1.10E+02 | 9.10E+02 | 1.13E+00 | 1.99E-05 | 2.80E+06 | 2.80E+06 |
| halyhaly  | M_In | 96374  | 2.34E-01 | 5.90E+01  | 2.45E+01 | 1.31E+00 | -2.29E+02 | 1.53E+03 | 1.12E+00 | 5.13E-05 | 1.68E+06 | 1.68E+06 |
| hanspolly | F_As | 1001   | 4.14E-01 | 2.84E+01  | 8.45E+00 | 1.37E+00 | 1.31E+01  | 4.04E+01 | 8.06E-01 | 1.70E-03 | 1.09E+04 | 1.10E+04 |
| helimelp  | M_In | 81964  | 6.80E-02 | 1.45E+01  | 6.58E+01 | 7.51E+00 | -9.61E+01 | 4.45E+02 | 1.46E+00 | 6.81E-05 | 1.25E+06 | 1.25E+06 |
| hessvesi  | F_Mu | 40282  | 9.29E-01 | -7.55E+00 | 6.80E+01 | 6.62E+00 | -3.13E+01 | 1.21E+02 | 2.04E+00 | 3.20E-04 | 3.41E+05 | 3.41E+05 |
| heteanno  | F_Ba | 57267  | 8.11E-01 | 2.70E+01  | 2.81E+01 | 4.86E+00 | -2.00E+01 | 9.34E+01 | 1.97E+00 | 4.10E-04 | 4.72E+05 | 4.72E+05 |
| homavitir | M_In | 5741   | 6.26E-02 | 6.35E+01  | 6.38E+01 | 1.04E+00 | -3.89E+02 | 1.93E+03 | 1.28E+00 | 1.79E-04 | 1.07E+05 | 1.07E+05 |
| homosapi  | M_Mm | 313281 | 2.14E-01 | 6.39E+01  | 9.31E+01 | 6.91E-01 | -1.86E+02 | 1.91E+03 | 9.43E-01 | 1.36E-05 | 5.93E+06 | 5.93E+06 |
| hyalarab  | O_St | 13062  | 6.72E-01 | -3.07E+01 | 1.24E+02 | 2.12E+00 | -2.47E+02 | 3.24E+02 | 3.00E+01 | 4.56E-04 | 1.44E+05 | 1.44E+05 |
| hydnpina  | F_Ba | 74579  | 8.95E-01 | 2.60E+01  | 2.72E+01 | 5.40E+00 | -5.07E+00 | 8.04E+01 | 1.52E+00 | 3.41E-04 | 5.62E+05 | 5.62E+05 |
| hydrvulg  | M_Cn | 77951  | 5.96E-01 | 5.25E+01  | 8.02E+01 | 8.46E-01 | -3.88E+03 | 6.87E+03 | 2.76E+00 | 6.27E-05 | 1.30E+06 | 1.30E+06 |
| hyphburt  | F_As | 1251   | 2.01E-01 | 3.19E+01  | 2.19E+01 | 4.62E+00 | -5.85E+00 | 8.46E+01 | 1.30E+00 | 2.62E-03 | 1.46E+04 | 1.47E+04 |
| hyphsubl  | F_Ba | 88959  | 8.88E-01 | -4.77E+01 | 1.01E+02 | 1.93E+01 | -1.18E+01 | 8.96E+01 | 1.67E+00 | 2.55E-04 | 6.71E+05 | 6.71E+05 |
| hypospec  | F_As | 60230  | 6.20E-01 | 3.54E+01  | 2.32E+01 | 2.33E+00 | -2.83E+01 | 1.56E+02 | 1.54E+00 | 1.20E-04 | 6.47E+05 | 6.47E+05 |
| hystpuli  | F_As | 26555  | 7.05E-01 | 1.96E+01  | 3.29E+01 | 6.28E+00 | -2.99E+00 | 1.01E+02 | 1.77E+00 | 4.29E-04 | 2.38E+05 | 2.38E+05 |
| ilyospec  | F_As | 41061  | 7.32E-01 | 2.55E+01  | 2.82E+01 | 4.42E+00 | 3.27E-01  | 7.28E+01 | 1.59E+00 | 2.87E-04 | 3.62E+05 | 3.62E+05 |
| jaapargi  | F_Ba | 86389  | 8.93E-01 | 1.11E+01  | 4.32E+01 | 8.14E+00 | -1.92E+01 | 9.86E+01 | 1.99E+00 | 2.58E-04 | 6.52E+05 | 6.52E+05 |
| jacujacu  | M_Mm | 166941 | 2.31E-01 | 6.47E+01  | 6.28E+01 | 7.25E-01 | -3.43E+02 | 1.91E+03 | 1.14E+00 | 2.26E-05 | 3.06E+06 | 3.06E+06 |
| jamispec  | F_Ba | 11020  | 8.23E-01 | -1.98E+02 | 2.72E+02 | 3.00E+01 | -6.81E+01 | 1.63E+02 | 2.31E+00 | 7.82E-04 | 9.81E+04 | 9.82E+04 |
| karsrhod  | F_As | 30048  | 6.69E-01 | 2.37E+01  | 2.65E+01 | 6.30E+00 | -1.79E+01 | 9.78E+01 | 2.26E+00 | 4.28E-04 | 2.59E+05 | 2.59E+05 |
| laccbico  | F_Ba | 60024  | 6.53E-01 | -7.10E+01 | 1.23E+02 | 3.00E+01 | -1.07E+01 | 8.13E+01 | 1.57E+00 | 3.01E-04 | 5.29E+05 | 5.30E+05 |
| laetsulp  | F_Ba | 74113  | 8.63E-01 | 2.46E+00  | 5.15E+01 | 1.04E+01 | -1.38E+01 | 8.58E+01 | 1.71E+00 | 2.86E-04 | 5.67E+05 | 5.67E+05 |
| latichal  | M_Sa | 170402 | 3.88E-02 | 6.70E+01  | 4.33E+01 | 1.24E+00 | -3.88E+02 | 2.29E+03 | 1.19E+00 | 1.44E-05 | 3.27E+06 | 3.27E+06 |
| leiospec  | F_Ba | 81811  | 8.90E-01 | 2.43E+01  | 3.15E+01 | 5.22E+00 | -3.78E+01 | 1.25E+02 | 2.20E+00 | 3.31E-04 | 6.44E+05 | 6.44E+05 |
| lentfluv  | F_As | 31391  | 6.66E-01 | 3.30E+01  | 1.74E+01 | 3.92E+00 | -6.92E+00 | 8.37E+01 | 1.83E+00 | 3.77E-04 | 2.76E+05 | 2.76E+05 |
| lenttigr  | F_Ba | 82263  | 8.83E-01 | 2.18E+01  | 3.33E+01 | 5.93E+00 | -1.79E+01 | 1.08E+02 | 1.62E+00 | 2.51E-04 | 6.48E+05 | 6.48E+05 |
| lepiocul  | M_Fs | 199944 | 4.68E-02 | 4.42E+01  | 5.20E+01 | 3.08E+00 | -3.39E+01 | 6.95E+02 | 1.05E+00 | 1.70E-05 | 3.43E+06 | 3.43E+06 |
| lepipalu  | F_As | 32014  | 6.78E-01 | 3.45E+01  | 1.93E+01 | 3.04E+00 | -1.97E+01 | 1.01E+02 | 2.13E+00 | 2.96E-04 | 2.93E+05 | 2.93E+05 |
| leptdisc  | M_Av | 114409 | 9.12E-02 | 6.28E+01  | 4.10E+01 | 1.15E+00 | -1.91E+02 | 9.72E+02 | 1.39E+00 | 2.75E-05 | 1.94E+06 | 1.94E+06 |
| leucmoll  | F_Ba | 89623  | 8.81E-01 | 4.70E+00  | 4.87E+01 | 1.00E+01 | -3.33E+01 | 1.05E+02 | 2.40E+00 | 3.48E-04 | 6.65E+05 | 6.65E+05 |
| lichhyal  | F_Mu | 51704  | 9.04E-01 | -1.75E-01 | 5.71E+01 | 1.02E+01 | -4.09E+01 | 1.23E+02 | 2.63E+00 | 4.99E-04 | 3.88E+05 | 3.88E+05 |
| limupoly  | M_Ar | 147122 | 4.37E-01 | -1.67E+02 | 7.63E+02 | 1.47E+00 | -9.95E+02 | 3.49E+03 | 1.75E+00 | 1.90E-05 | 2.70E+06 | 2.70E+06 |
| lindingo  | F_As | 39201  | 5.28E-01 | 9.00E+00  | 3.82E+01 | 1.60E+00 | 3.31E+01  | 1.86E+01 | 3.81E+00 | 3.39E-04 | 3.57E+05 | 3.57E+05 |
| linganat  | M_Br | 453297 | 7.81E-01 | -3.79E+02 | 6.61E+02 | 5.58E+00 | -4.66E+02 | 1.62E+03 | 1.67E+00 | 2.04E-05 | 6.60E+06 | 6.60E+06 |
| linuusit  | P_Eu | 173162 | 5.51E-01 | -2.54E+01 | 1.13E+02 | 9.05E+00 | -8.92E+01 | 3.07E+02 | 1.99E+00 | 9.83E-05 | 2.03E+06 | 2.03E+06 |
| lipostar  | F_As | 17239  | 8.36E-01 | 1.89E+01  | 3.40E+01 | 6.48E+00 | -2.86E+01 | 1.02E+02 | 2.18E+00 | 6.12E-04 | 1.36E+05 | 1.36E+05 |
| litosigm  | M_Ne | 80562  | 1.71E-01 | -2.85E+01 | 1.14E+02 | 5.74E+00 | -1.07E+02 | 2.97E+02 | 3.10E+00 | 1.02E-04 | 1.01E+06 | 1.01E+06 |
| lophmacr  | F_As | 34102  | 6.67E-01 | 3.10E+01  | 2.01E+01 | 4.25E+00 | -2.59E+01 | 1.11E+02 | 2.35E+00 | 3.21E-04 | 3.02E+05 | 3.02E+05 |
| lophmyti  | F_As | 33859  | 7.28E-01 | 3.33E+01  | 1.91E+01 | 3.50E+00 | -2.26E+01 | 1.12E+02 | 2.12E+00 | 3.62E-04 | 2.98E+05 | 2.98E+05 |
| lorajunc  | F_As | 35404  | 6.42E-01 | 3.29E+01  | 1.68E+01 | 3.69E+00 | -2.13E+01 | 9.96E+01 | 2.38E+00 | 2.73E-04 | 3.13E+05 | 3.13E+05 |
| lottgiga  | M_Mo | 229628 | 5.21E-01 | -2.47E+03 | 2.74E+03 | 2.57E-01 | -1.28E+02 | 5.36E+02 | 1.42E+00 | 4.17E-05 | 3.32E+06 | 3.32E+06 |
| loxoafri  | M_Mm | 177020 | 1.89E-01 | 6.49E+01  | 6.35E+01 | 7.55E-01 | -1.79E+02 | 1.51E+03 | 9.79E-01 | 1.88E-05 | 3.26E+06 | 3.26E+06 |
| macafasc  | M_Mm | 233372 | 2.18E-01 | 6.47E+01  | 8.38E+01 | 6.89E-01 | -2.03E+02 | 1.85E+03 | 9.76E-01 | 1.64E-05 | 4.38E+06 | 4.38E+06 |
| macamula  | M_Mm | 221604 | 2.21E-01 | 6.47E+01  | 8.09E+01 | 6.97E-01 | -2.24E+02 | 1.82E+03 | 1.00E+00 | 1.75E-05 | 4.13E+06 | 4.13E+06 |
| nacanemz  | M_Mm | 250823 | 2.12E-01 | 6.45E+01  | 8.59E+01 | 6.85E-01 | -1.89E+02 | 1.90E+03 | 9.33E-01 | 1.46E-05 | 4.75E+06 | 4.75E+06 |
| macranom  | F_As | 22038  | 6.52E-01 | 2.30E+01  | 2.70E+01 | 7.72E+00 | -7.71E+00 | 8.38E+01 | 1.84E+00 | 4.74E-04 | 1.89E+05 | 1.89E+05 |
| macrfuli  | F_Ba | 74269  | 8.66E-01 | 4.97E+00  | 4.75E+01 | 1.07E+01 | -1.28E+01 | 8.05E+01 | 1.80E+00 | 2.23E-04 | 5.51E+05 | 5.51E+05 |
| macrphas  | F_As | 20645  | 7.56E-01 | 2.99E+01  | 2.33E+01 | 4.35E+00 | -4.65E+01 | 1.51E+02 | 2.47E+00 | 6.11E-04 | 1.80E+05 | 1.80E+05 |
| magngris  | F_As | 19490  | 6.89E-01 | -1.80E+02 | 2.55E+02 | 1.65E+01 | -2.06E+02 | 3.38E+02 | 4.13E+00 | 2.62E-04 | 2.02E+05 | 2.02E+05 |
| manavitir | M_Av | 127971 | 8.01E-02 | 5.52E+01  | 3.95E+01 | 1.75E+00 | -1.17E+02 | 8.49E+02 | 1.18E+00 | 2.53E-05 | 2.19E+06 | 2.19E+06 |
| mandleuc  | M_Mm | 196565 | 2.18E-01 | 6.46E+01  | 7.58E+01 | 7.12E-01 | -2.38E+02 | 1.78E+03 | 9.99E-01 | 1.84E-05 | 3.65E+06 | 3.65E+06 |
| mandsxt   | M_In | 8712   | 9.54E-02 | 4.52E+01  | 3.26E+01 | 3.57E+00 | -5.17E+01 | 4.55E+02 | 1.30E+00 | 2.05E-04 | 1.35E+05 | 1.35E+05 |
| marafiar  | F_Ba | 98565  | 8.86E-01 | -5.36E+00 | 6.02E+01 | 1.09E+01 | -2.53E+01 | 9.43E+01 | 2.20E+00 | 2.23E-04 | 7.46E+05 | 7.46E+05 |
| marcpoly  | P_Ma | 79794  | 8.00E-01 | 3.84E+01  | 1.44E+02 | 1.57E+00 | -4.03E+02 | 6.31E+02 | 4.45E+00 | 9.08E-05 | 1.04E+06 | 1.04E+06 |
| massebur  | F_As | 25613  | 7.25E-01 | 3.71E+01  | 1.42E+01 | 2.62E+00 | -1.87E+01 | 1.01E+02 | 2.20E+00 | 3.31E-04 | 2.23E+05 | 2.24E+05 |
| mayedest  | M_In | 2949   | 6.89E-01 | -1.07E+01 | 8.64E+01 | 6.82E+00 | -3.06E+01 | 2.54E+02 | 1.05E+00 | 7.26E-04 | 3.35E+04 | 3.35E+04 |
| megarotu  | M_In | 72456  | 4.56E-01 | -1.03E+02 | 1.75E+02 | 1.56E+01 | 2.17E+01  | 2.80E+02 | 7.63E-01 | 1.12E-04 | 9.88E+05 | 9.88E+05 |
| meirmilt  | F_Eu | 5165   | 5.55E-01 | -1.02E+02 | 1.67E+02 | 2.74E+01 | -1.06E+01 | 9.24E+01 | 1.38E+00 | 1.08E-03 | 5.22E+04 | 5.23E+04 |
| melalari  | F_Ba | 64830  | 7.14E-01 | -1.44E+02 | 2.17E+02 | 1.82E+01 | -1.26E+01 | 9.64E+01 | 1.60E+00 | 1.45E-04 | 6.34E+05 | 6.34E+05 |
| melapulv  | F_As | 30831  | 7.18E-01 | 3.33E+01  | 1.83E+01 | 3.63E+00 | -2.10E+01 | 1.02E+02 | 2.17E+00 | 3.65E-04 | 2.67E+05 | 2.67E+05 |
| melaspec  | F_As | 32974  | 7.35E-01 | 3.76E+01  | 2.54E+01 | 1.98E+00 | -3.18E+00 | 9.28E+01 | 1.49E+00 | 1.95E-04 | 3.31E+05 | 3.31E+05 |
| melegall  | M_Av | 161042 | 1.52E-01 | 5.50E+01  | 3.98E+01 | 1.29E+00 | -7.74E+01 | 8.10E+02 | 1.15E+00 | 2.23E-05 | 2.71E+06 | 2.71E+06 |
| melibico  | F_As | 42829  | 6.61E-01 | 3.31E+01  | 1.75E+01 | 3.58E+00 | -1.14E+01 | 8.84E+01 | 1.99E+00 | 2.25E-04 | 3.80E+05 | 3.80E+05 |
| melouнду  | M_Av | 134988 | 1.01E-01 | 5.54E+01  | 3.79E+01 | 1.55E+00 | -1.15E+02 | 8.80E+02 | 1.16E+00 | 2.33E-05 | 2.31E+06 | 2.31E+06 |
| meronubi  | M_Av | 106597 | 8.83E-02 | 6.39E+01  | 3.84E+01 | 1.16E+00 | -2.07E+02 | 9.64E+02 | 1.45E+00 | 3.02E-05 | 1.79E+06 | 1.79E+06 |
| mesiuinic | M_Av | 112944 | 1.03E-01 | 6.12E+01  | 4.05E+01 | 1.24E+00 | -2.02E+02 | 9.33E+02 | 1.45E+00 | 2.95E-05 | 1.88E+06 | 1.88E+06 |
| metaacri  | F_As | 16443  | 5.48E-01 | -2.28E+00 | 6.10E+01 | 7.33E+00 | -1.46E+01 | 1.06E+02 | 1.86E+00 | 4.03E-04 | 1.66E+05 | 1.66E+05 |
| metarobe  | F_As | 17544  | 5.89E-01 | -8.68E+00 | 6.74E+01 | 8.19E+00 | -1.73E+01 | 1.08E+02 | 1.95E+00 | 3.73E-04 | 1.73E+05 | 1.73E+05 |
| micrcani  | F_As | 19630  | 7.01E-01 | 1.99E-01  | 5.93E+01 | 7.57E+00 | -5.14E+01 | 1.21E+02 | 2.86E+00 | 3.48E-04 | 1.77E+05 | 1.77E+05 |
| micrdemo  | M_In | 54649  | 4.52E-01 | 1.86E+01  | 5.51E+01 | 4.25E+00 | -2.41E+01 | 4.74E+02 | 9.59E-01 | 9.00E-05 | 7.73E+05 | 7.73E+05 |
| micrmuri  | M_Mm | 233039 | 2.01E-01 | 6.38E+01  | 7.35E+01 | 7.34E-01 | -1.57E+02 | 1.56E+03 | 9.58E-01 | 1.59E-05 | 4.32E+06 | 4.32E+06 |
| microssp  | F_As | 12311  | 7.85E-01 | -2.33E+02 | 3.13E+02 | 2.99E+01 | -7.97E+01 | 1.84E+02 | 2.48E+00 | 4.17E-04 | 1.15E+05 | 1.15E+05 |
| micrtrig  | F_As | 27425  | 7.48E-01 | 3.15E+01  | 2.82E+01 | 2.90E+00 | -7.08E+00 | 8.68E+01 | 1.67E+00 | 2.73E-04 | 2.58E+05 | 2.58E+05 |
| mimugutt  | P_Eu | 116795 | 5.54E-01 | 2.17E+01  | 7.09E+01 | 4.17E+00 | -4.49E+02 | 7.57E+02 | 3.42E+00 | 8.95E-05 | 1.44E+06 | 1.44E+06 |
| mixiosmu  | F_Ba | 25218  | 8.93E-01 | -6.55E+01 | 1.16E+02 | 3.00E+01 | -1.37E+01 | 8.62E+01 | 1.90E+00 | 1.19E-03 | 1.74E+05 | 1.74E+05 |
| monahapt  | F_As | 25251  | 9.06E-01 | 2.55E+01  | 3.81E+01 | 3.66E+00 | -3.15E+00 | 1.49E+02 | 1.20E+00 | 2.65E-04 | 2.28E+05 | 2.28E+05 |
| monapurp  | F_As | 23145  | 8.58E-01 | 2.53E+01  | 3.59E+01 | 3.34E+00 | -9.84E+00 | 7.94E+01 | 1.46E+00 | 3.36E-04 | 2.10E+05 | 2.10E+05 |
| monarube  | F_As | 25300  | 8.47E-   |           |          |          |           |          |          |          |          |          |

|           |      |        |          |           |          |          |           |          |          |          |          |          |
|-----------|------|--------|----------|-----------|----------|----------|-----------|----------|----------|----------|----------|----------|
| mytiresi  | F_As | 37078  | 7.04E-01 | 3.28E+01  | 1.98E+01 | 3.54E+00 | -1.92E+01 | 1.04E+02 | 2.05E+00 | 2.55E-04 | 3.31E+05 | 3.31E+05 |
| nadsfulv  | F_As | 3812   | 5.07E-01 | 7.14E+00  | 6.57E+01 | 3.87E+00 | -3.65E+01 | 1.43E+02 | 1.77E+00 | 8.10E-04 | 4.29E+04 | 4.30E+04 |
| naegfowl  | O_He | 8538   | 4.77E-01 | 4.42E+01  | 1.49E+01 | 1.25E+00 | -2.82E+02 | 4.00E+02 | 8.02E+00 | 7.56E-04 | 9.09E+04 | 9.10E+04 |
| naiaflui  | F_Ba | 55433  | 1.44E-01 | -1.28E+01 | 8.39E+01 | 1.55E+00 | 1.17E+01  | 6.10E+01 | 4.68E+00 | 1.71E-04 | 5.17E+05 | 5.17E+05 |
| nannkali  | M_Mm | 182016 | 2.24E-01 | 6.37E+01  | 6.47E+01 | 7.29E-01 | -2.21E+02 | 1.63E+03 | 1.04E+00 | 2.10E-05 | 3.33E+06 | 3.33E+06 |
| nasogira  | M_In | 4889   | 5.75E-01 | -1.67E+02 | 2.42E+02 | 3.00E+01 | -2.90E+01 | 2.27E+02 | 1.17E+00 | 6.43E-04 | 5.61E+04 | 5.62E+04 |
| nasovitv  | M_In | 134160 | 5.24E-01 | -1.94E+02 | 2.69E+02 | 3.00E+01 | 1.07E+01  | 2.16E+02 | 8.30E-01 | 1.37E-04 | 1.66E+06 | 1.66E+06 |
| nechtaem  | F_As | 32806  | 6.06E-01 | -1.41E+00 | 5.23E+01 | 1.18E+01 | -2.85E+00 | 6.84E+01 | 1.84E+00 | 3.52E-04 | 2.89E+05 | 2.89E+05 |
| nemavect  | M_Cn | 214828 | 9.97E-02 | 4.45E+01  | 3.92E+01 | 2.08E+00 | -1.50E+02 | 5.24E+02 | 1.77E+00 | 5.12E-05 | 3.23E+06 | 3.23E+06 |
| neofparv  | F_As | 21788  | 8.15E-01 | 4.14E+01  | 1.34E+01 | 1.72E+00 | -3.52E+03 | 3.76E+03 | 2.99E+01 | 7.63E-04 | 2.08E+05 | 2.08E+05 |
| neollepi  | F_Ba | 79013  | 8.85E-01 | 9.50E+00  | 4.40E+01 | 8.89E+00 | -2.45E+01 | 9.70E+01 | 2.18E+00 | 3.43E-04 | 5.64E+05 | 5.64E+05 |
| neosfisc  | F_As | 20462  | 8.37E-01 | 2.43E+00  | 5.20E+01 | 6.82E+00 | -1.01E+02 | 1.91E+02 | 3.56E+00 | 6.12E-04 | 1.74E+05 | 1.74E+05 |
| nestnota  | M_Av | 116001 | 9.56E-02 | 6.26E+01  | 3.88E+01 | 1.16E+00 | -1.87E+02 | 9.42E+02 | 1.41E+00 | 2.81E-05 | 1.95E+06 | 1.95E+06 |
| neurcras  | F_As | 17778  | 7.90E-01 | 3.44E+01  | 3.02E+01 | 2.29E+00 | -1.67E+02 | 3.30E+02 | 3.48E+00 | 3.17E-04 | 1.80E+05 | 1.80E+05 |
| neurdisc  | F_As | 18024  | 4.91E-01 | 2.43E+01  | 3.87E+01 | 3.91E+00 | -3.07E+01 | 1.23E+02 | 2.05E+00 | 3.29E-04 | 1.90E+05 | 1.90E+05 |
| neurtetr  | F_As | 18362  | 5.05E-01 | 2.98E+01  | 3.28E+01 | 3.23E+00 | -1.98E+01 | 1.19E+02 | 1.78E+00 | 2.66E-04 | 1.97E+05 | 1.97E+05 |
| niesexil  | F_As | 26446  | 8.14E-01 | 2.68E+01  | 2.64E+01 | 4.10E+00 | -2.62E+01 | 1.17E+02 | 1.69E+00 | 3.79E-04 | 2.29E+05 | 2.29E+05 |
| nippnipp  | M_Av | 140453 | 9.29E-02 | 5.45E+01  | 4.16E+01 | 1.61E+00 | -1.36E+02 | 9.23E+02 | 1.18E+00 | 2.25E-05 | 2.42E+06 | 2.42E+06 |
| nomaleuc  | M_Mm | 185780 | 2.02E-01 | 6.43E+01  | 7.83E+01 | 7.12E-01 | -2.43E+02 | 1.82E+03 | 1.00E+00 | 1.83E-05 | 3.47E+06 | 3.47E+06 |
| obbarivu  | F_Ba | 77002  | 8.82E-01 | -4.25E+00 | 5.74E+01 | 1.26E+01 | -2.61E+01 | 9.95E+01 | 2.14E+00 | 4.08E-04 | 5.64E+05 | 5.64E+05 |
| octobima  | M_Mo | 234484 | 2.33E-02 | -8.09E+02 | 9.15E+02 | 3.00E+01 | -3.28E+02 | 1.60E+03 | 1.23E+00 | 2.01E-05 | 4.31E+06 | 4.31E+06 |
| oesodent  | M_Ne | 107666 | 7.01E-01 | 4.20E+01  | 1.67E+01 | 1.49E+00 | -3.48E+02 | 7.93E+02 | 1.99E+00 | 2.93E-04 | 1.26E+06 | 1.26E+06 |
| oidimaiu  | F_As | 13536  | 6.95E-01 | 3.31E+01  | 1.93E+01 | 3.09E+00 | 1.16E+00  | 7.02E+01 | 1.63E+00 | 3.55E-04 | 1.22E+05 | 1.22E+05 |
| ompholea  | F_Ba | 50222  | 8.62E-01 | -8.67E+01 | 1.40E+02 | 3.00E+01 | 5.84E+00  | 7.77E+01 | 1.36E+00 | 2.82E-04 | 3.81E+05 | 3.81E+05 |
| onchoche  | M_Ne | 80495  | 2.88E-01 | 1.10E+01  | 9.56E+01 | 2.41E+00 | -1.45E+02 | 3.99E+02 | 3.19E+00 | 9.08E-05 | 1.05E+06 | 1.05E+06 |
| onchvolv  | M_Ne | 89476  | 3.87E-01 | 4.09E+01  | 1.03E+02 | 1.09E+00 | -4.43E+02 | 6.78E+02 | 5.09E+00 | 6.93E-05 | 1.20E+06 | 1.20E+06 |
| oncofasc  | M_In | 1558   | 1.88E-01 | 6.37E+01  | 4.11E+01 | 6.69E-01 | -8.00E+02 | 2.47E+03 | 1.75E+00 | 6.42E-04 | 2.79E+04 | 2.80E+04 |
| ophidiss  | F_As | 29006  | 7.17E-01 | 3.15E+01  | 1.86E+01 | 4.51E+00 | -6.63E+00 | 8.58E+01 | 1.76E+00 | 3.29E-04 | 2.45E+05 | 2.45E+05 |
| ophipice  | F_As | 11025  | 7.39E-01 | 1.85E+01  | 4.19E+01 | 4.05E+00 | -1.01E+02 | 2.47E+02 | 2.41E+00 | 4.34E-04 | 1.11E+05 | 1.11E+05 |
| ophipili  | F_As | 10480  | 8.97E-01 | 3.85E+01  | 2.23E+01 | 1.73E+00 | -4.22E+02 | 6.89E+02 | 4.86E+00 | 7.27E-04 | 1.03E+05 | 1.03E+05 |
| opishoaz  | M_Av | 122216 | 5.76E-02 | 5.37E+01  | 4.35E+01 | 1.86E+00 | -1.46E+02 | 9.83E+02 | 1.18E+00 | 2.33E-05 | 2.13E+06 | 2.13E+06 |
| ornianat  | M_Mm | 136545 | 1.45E-01 | 6.82E+01  | 7.12E+01 | 7.96E-01 | -2.56E+02 | 1.41E+03 | 1.23E+00 | 2.12E-05 | 2.49E+06 | 2.49E+06 |
| orπισpec  | F_Ne | 34970  | 1.10E-02 | -3.76E+02 | 4.14E+02 | 3.00E+01 | -3.30E+00 | 1.21E+02 | 2.84E+00 | 2.22E-04 | 3.89E+05 | 3.89E+05 |
| oryccuni  | M_Mm | 160794 | 2.22E-01 | 6.62E+01  | 7.40E+01 | 6.92E-01 | -2.08E+02 | 1.73E+03 | 9.96E-01 | 2.03E-05 | 2.98E+06 | 2.98E+06 |
| oryzbrac  | P_Mo | 114899 | 5.14E-01 | 3.67E+01  | 5.39E+01 | 2.92E+00 | -1.88E+02 | 5.97E+02 | 1.99E+00 | 6.43E-05 | 1.52E+06 | 1.52E+06 |
| ostrluci  | P_Ch | 1930   | 1.52E-01 | -2.30E+01 | 7.23E+01 | 2.12E+01 | -5.93E+01 | 1.60E+02 | 2.56E+00 | 1.84E-03 | 2.22E+04 | 2.22E+04 |
| ovisarie  | M_Mm | 191071 | 1.57E-01 | 6.52E+01  | 5.55E+01 | 8.06E-01 | -1.82E+02 | 1.45E+03 | 9.63E-01 | 1.73E-05 | 3.52E+06 | 3.52E+06 |
| pachtann  | F_As | 1802   | 5.28E-01 | -1.10E+00 | 7.13E+01 | 1.28E+00 | -4.76E+02 | 5.65E+02 | 3.00E+01 | 1.75E-03 | 2.01E+04 | 2.02E+04 |
| pan_pani  | M_Mm | 211448 | 2.22E-01 | 6.41E+01  | 8.04E+01 | 7.09E-01 | -2.13E+02 | 1.75E+03 | 1.02E+00 | 1.81E-05 | 3.92E+06 | 3.92E+06 |
| pan_trog  | M_Mm | 205886 | 2.05E-01 | 6.52E+01  | 8.24E+01 | 6.95E-01 | -2.12E+02 | 1.83E+03 | 9.89E-01 | 1.66E-05 | 3.86E+06 | 3.86E+06 |
| panurudi  | F_Ba | 83142  | 8.71E-01 | 1.52E+01  | 3.98E+01 | 7.20E+00 | -4.01E+01 | 1.17E+02 | 2.52E+00 | 3.00E-04 | 6.43E+05 | 6.43E+05 |
| papianub  | M_Mm | 226137 | 2.31E-01 | 6.35E+01  | 8.73E+01 | 7.05E-01 | -2.45E+02 | 1.85E+03 | 1.03E+00 | 1.80E-05 | 4.20E+06 | 4.20E+06 |
| papimach  | M_In | 82187  | 1.05E-01 | 3.62E+01  | 4.16E+01 | 5.07E+00 | 3.56E+00  | 2.68E+02 | 1.10E+00 | 5.39E-05 | 1.22E+06 | 1.22E+06 |
| papipoly  | M_In | 78814  | 4.46E-01 | 6.20E+01  | 6.62E+01 | 5.42E-01 | -1.70E+02 | 5.57E+02 | 2.27E+00 | 7.50E-05 | 1.20E+06 | 1.20E+06 |
| papixuth  | M_In | 94387  | 1.08E-01 | 1.51E+01  | 6.22E+01 | 7.91E+00 | 9.34E+00  | 2.55E+02 | 1.10E+00 | 6.14E-05 | 1.40E+06 | 1.40E+06 |
| parabras  | F_As | 19452  | 5.69E-01 | 1.51E+01  | 5.44E+01 | 3.35E+00 | -4.64E+01 | 1.52E+02 | 1.95E+00 | 2.78E-04 | 2.13E+05 | 2.13E+05 |
| paraeequo | M_Ne | 27140  | 1.51E-01 | -5.64E+00 | 7.28E+01 | 1.30E+00 | -6.29E+02 | 1.11E+03 | 3.58E+00 | 1.25E-04 | 4.06E+05 | 4.06E+05 |
| paraspor  | F_As | 28441  | 6.78E-01 | 2.72E+01  | 2.29E+01 | 5.55E+00 | -2.11E+01 | 1.01E+02 | 2.32E+00 | 4.78E-04 | 2.43E+05 | 2.43E+05 |
| paratepi  | M_Ar | 120713 | 9.41E-02 | 6.30E+01  | 2.66E+01 | 1.26E+00 | -4.89E+02 | 2.13E+03 | 1.54E+00 | 2.84E-05 | 2.19E+06 | 2.19E+06 |
| parumajo  | M_Av | 183416 | 1.11E-01 | 5.56E+01  | 3.81E+01 | 1.49E+00 | -5.04E+01 | 8.46E+02 | 1.01E+00 | 1.81E-05 | 3.20E+06 | 3.20E+06 |
| pateatra  | F_As | 24183  | 6.80E-01 | 3.31E+01  | 1.95E+01 | 3.64E+00 | -1.48E+01 | 9.84E+01 | 1.98E+00 | 3.89E-04 | 2.17E+05 | 2.17E+05 |
| paxiinvo  | F_Ba | 80782  | 8.64E-01 | 2.22E+01  | 3.07E+01 | 6.04E+00 | 4.98E+00  | 7.75E+01 | 1.06E+00 | 2.29E-04 | 6.41E+05 | 6.41E+05 |
| paxirubi  | F_Ba | 135697 | 7.75E-01 | 2.54E+01  | 2.83E+01 | 4.58E+00 | -1.86E+01 | 1.03E+02 | 1.86E+00 | 1.63E-04 | 1.18E+06 | 1.18E+06 |
| pedihuma  | M_In | 120117 | 6.11E-01 | 1.36E+01  | 6.70E+01 | 6.35E+00 | -2.47E+01 | 1.89E+02 | 1.24E+00 | 1.40E-04 | 1.35E+06 | 1.35E+06 |
| pelecris  | M_Av | 111738 | 8.79E-02 | 6.50E+01  | 4.09E+01 | 1.07E+00 | -2.30E+02 | 1.01E+03 | 1.49E+00 | 2.85E-05 | 1.88E+06 | 1.88E+06 |
| pelosine  | M_Rp | 169187 | 7.09E-02 | 6.99E+01  | 4.89E+01 | 7.66E-01 | -2.43E+02 | 1.68E+03 | 1.06E+00 | 1.58E-05 | 3.18E+06 | 3.18E+06 |
| penibila  | F_As | 31314  | 1.55E-01 | -9.15E+00 | 7.56E+01 | 1.50E+00 | 3.35E+01  | 2.53E+01 | 2.69E+00 | 3.17E-04 | 2.17E+05 | 2.17E+05 |
| penibrev  | F_As | 27899  | 8.45E-01 | 2.86E+01  | 2.47E+01 | 3.99E+00 | -1.08E+01 | 8.90E+01 | 1.94E+00 | 4.75E-04 | 2.27E+05 | 2.28E+05 |
| penicane  | F_As | 27579  | 8.33E-01 | 3.21E+01  | 2.15E+01 | 3.35E+00 | -6.12E+00 | 8.30E+01 | 1.81E+00 | 4.10E-04 | 2.29E+05 | 2.29E+05 |
| penichry  | F_As | 23916  | 7.02E-01 | 2.54E+01  | 2.94E+01 | 4.60E+00 | -9.40E+00 | 8.40E+01 | 1.92E+00 | 3.94E-04 | 2.13E+05 | 2.13E+05 |
| penidigi  | F_As | 15044  | 8.25E-01 | 2.53E+01  | 3.01E+01 | 4.51E+00 | -3.19E+01 | 1.29E+02 | 2.28E+00 | 6.20E-04 | 1.28E+05 | 1.28E+05 |
| peniexpa  | F_As | 26084  | 8.25E-01 | 2.79E+01  | 2.76E+01 | 4.02E+00 | -1.05E+01 | 8.93E+01 | 1.95E+00 | 3.83E-04 | 2.19E+05 | 2.19E+05 |
| penifell  | F_As | 25307  | 8.64E-01 | 3.24E+01  | 2.33E+01 | 3.23E+00 | -2.61E+01 | 1.02E+02 | 1.86E+00 | 4.01E-04 | 2.13E+05 | 2.13E+05 |
| peniglab  | F_As | 28490  | 8.52E-01 | 3.21E+01  | 2.28E+01 | 3.31E+00 | -2.49E+01 | 1.01E+02 | 1.91E+00 | 4.04E-04 | 2.39E+05 | 2.39E+05 |
| penijant  | F_As | 28925  | 7.95E-01 | 2.92E+01  | 2.95E+01 | 3.42E+00 | -6.75E+00 | 8.83E+01 | 1.70E+00 | 2.82E-04 | 2.60E+05 | 2.60E+05 |
| penilano  | F_As | 24409  | 8.26E-01 | 3.27E+01  | 2.27E+01 | 3.25E+00 | -3.59E+01 | 1.10E+02 | 2.20E+00 | 4.28E-04 | 2.08E+05 | 2.08E+05 |
| penioxal  | F_As | 19200  | 8.53E-02 | 1.84E+01  | 4.81E+01 | 1.08E+00 | 3.62E+01  | 3.23E+01 | 1.89E+00 | 3.16E-04 | 1.88E+05 | 1.88E+05 |
| penirais  | F_As | 26895  | 8.42E-01 | 3.16E+01  | 2.23E+01 | 3.43E+00 | -1.22E+01 | 9.19E+01 | 1.93E+00 | 4.31E-04 | 2.23E+05 | 2.23E+05 |
| phaealeo  | F_As | 15475  | 8.89E-01 | 4.19E+01  | 1.43E+01 | 1.73E+00 | -3.82E+03 | 4.07E+03 | 3.00E+01 | 7.75E-04 | 1.41E+05 | 1.41E+05 |
| phaelept  | M_Av | 114111 | 8.67E-02 | 6.30E+01  | 4.05E+01 | 1.18E+00 | -2.17E+02 | 9.94E+02 | 1.45E+00 | 2.74E-05 | 1.92E+06 | 1.92E+06 |
| phaetric  | O_St | 7473   | 2.64E-01 | -4.55E-01 | 5.32E+01 | 1.31E+00 | 5.54E+01  | 2.99E+01 | 1.33E+00 | 5.70E-04 | 8.19E+04 | 8.19E+04 |
| phalcarb  | M_Av | 104269 | 7.22E-02 | 6.45E+01  | 3.85E+01 | 1.18E+00 | -2.37E+02 | 1.03E+03 | 1.47E+00 | 2.98E-05 | 1.77E+06 | 1.77E+06 |
| phancarn  | F_Ba | 74327  | 8.88E-01 | 6.92E+00  | 4.60E+01 | 1.06E+01 | 1.79E+00  | 6.88E+01 | 1.29E+00 | 3.03E-04 | 5.42E+05 | 5.42E+05 |
| phanchry  | F_Ba | 72031  | 9.07E-01 | 1.94E+01  | 3.30E+01 | 7.85E+00 | -1.49E+01 | 8.46E+01 | 1.88E+00 | 4.95E-04 | 5.06E+05 | 5.06E+05 |
| phlebrev  | F_Ba | 81273  | 8.71E-01 | 1.42E+01  | 3.91E+01 | 8.23E+00 | -4.66E+00 | 8.47E+01 | 1.42E+00 | 2.41E-04 | 6.20E+05 | 6.20E+05 |
| phlegiga  | F_Ba | 61464  | 8.97E-01 | -4.92E+01 | 1.01E+02 | 2.58E+01 | -1.00E+01 | 8.33E+01 | 1.74E+00 | 4.09E-04 | 4.27E+05 | 4.27E+05 |
| phoedact  | P_Mo | 134665 | 5.13E-01 | 5.53E+01  | 4.39E+01 | 1.45E+00 | -5.80E+02 | 1.60E+03 | 1.77E+00 | 5.49E-05 | 2.02E+06 | 2.02E+06 |
| phomtrac  | F_As | 25904  | 6.70E-01 |           |          |          |           |          |          |          |          |          |

|           |      |        |          |           |          |          |           |          |          |          |          |          |
|-----------|------|--------|----------|-----------|----------|----------|-----------|----------|----------|----------|----------|----------|
| plafalc   | O_Al | 14959  | 1.94E-01 | -2.55E+01 | 1.47E+02 | 1.25E+00 | -1.66E+01 | 1.42E+02 | 3.63E+00 | 3.00E-04 | 1.74E+05 | 1.74E+05 |
| plafrag   | O_Al | 9384   | 7.35E-01 | -8.98E+02 | 1.04E+03 | 3.00E+01 | -7.63E+01 | 2.88E+02 | 1.67E+00 | 4.41E-04 | 1.10E+05 | 1.11E+05 |
| plasinui  | O_Al | 8064   | 2.01E-01 | -5.41E+01 | 2.03E+02 | 1.71E+00 | -4.55E+02 | 6.06E+02 | 1.52E+01 | 4.34E-04 | 9.24E+04 | 9.24E+04 |
| plasknow  | O_Al | 8139   | 8.91E-01 | -6.70E+01 | 2.16E+02 | 4.96E+00 | -2.92E+01 | 2.21E+02 | 1.49E+00 | 4.38E-04 | 9.30E+04 | 9.31E+04 |
| plasreic  | O_Al | 8433   | 6.23E-03 | 1.69E+01  | 5.13E+00 | 3.46E-01 | 8.68E+00  | 1.16E+02 | 2.86E+00 | 5.68E-04 | 9.27E+04 | 9.27E+04 |
| plavinc   | O_Al | 8263   | 5.23E-02 | 1.84E+01  | 3.85E+01 | 7.37E-01 | 2.70E+01  | 8.42E+01 | 2.87E+00 | 9.51E-04 | 8.79E+04 | 8.80E+04 |
| plaviva   | O_Al | 15821  | 1.92E-01 | -6.45E+01 | 2.25E+02 | 1.59E+00 | -9.02E+01 | 2.36E+02 | 5.96E+00 | 3.55E-04 | 1.84E+05 | 1.84E+05 |
| plasyoel  | O_Al | 9396   | 7.25E-02 | 1.24E+01  | 3.67E+01 | 7.71E-01 | 3.56E+01  | 8.34E+01 | 2.24E+00 | 8.35E-04 | 1.06E+05 | 1.08E+05 |
| pleosipa  | F_Ba | 27909  | 6.32E-01 | 3.47E+01  | 1.80E+01 | 3.22E+00 | -1.39E+01 | 9.79E+01 | 1.92E+00 | 2.96E-04 | 2.60E+05 | 2.60E+05 |
| pleuostr  | F_Ba | 61289  | 8.46E-01 | -2.88E+01 | 8.13E+01 | 1.89E+01 | -1.07E+01 | 8.25E+01 | 1.68E+00 | 3.03E-04 | 4.61E+05 | 4.61E+05 |
| plutxylo  | M_In | 175490 | 7.77E-01 | -2.92E+01 | 3.75E+02 | 9.88E-01 | -2.51E+03 | 2.87E+03 | 3.00E+01 | 6.35E-05 | 2.75E+06 | 2.75E+06 |
| podoanse  | F_As | 13764  | 7.19E-01 | 3.17E+00  | 5.43E+01 | 8.27E+00 | -1.70E+01 | 9.56E+01 | 2.62E+00 | 6.48E-04 | 1.19E+05 | 1.19E+05 |
| polyarcu  | F_Ba | 85218  | 8.86E-01 | 1.47E+01  | 4.00E+01 | 7.37E+00 | -1.77E+01 | 1.07E+02 | 1.62E+00 | 3.11E-04 | 6.61E+05 | 6.61E+05 |
| polycitr  | F_As | 14030  | 6.76E-01 | 3.04E+01  | 2.74E+01 | 3.78E+00 | -2.64E+01 | 9.72E+01 | 2.00E+00 | 5.49E-04 | 1.30E+05 | 1.30E+05 |
| polyfusc  | F_As | 28655  | 7.29E-01 | 2.06E+01  | 2.89E+01 | 7.25E+00 | -1.67E+01 | 9.69E+01 | 2.15E+00 | 4.23E-04 | 2.36E+05 | 2.36E+05 |
| polypall  | O_Am | 32441  | 5.23E-01 | -2.86E+02 | 3.59E+02 | 3.00E+01 | -4.51E+01 | 1.67E+02 | 1.56E+00 | 1.99E-04 | 3.67E+05 | 3.67E+05 |
| pongabel  | M_Mm | 175722 | 2.25E-01 | 6.41E+01  | 7.62E+01 | 7.24E-01 | -2.37E+02 | 1.69E+03 | 1.05E+00 | 2.09E-05 | 3.23E+06 | 3.23E+06 |
| postplac  | F_Ba | 64636  | 7.16E-01 | -4.56E+01 | 9.89E+01 | 2.24E+01 | -1.05E+01 | 8.79E+01 | 1.48E+00 | 2.58E-04 | 5.58E+05 | 5.58E+05 |
| priacaud  | M_Pr | 93824  | 7.75E-01 | -1.86E+02 | 5.16E+02 | 2.47E+00 | -1.10E+03 | 3.67E+03 | 1.67E+00 | 3.36E-05 | 1.51E+06 | 1.51E+06 |
| prisexsp  | M_Ne | 247005 | 2.05E-01 | 3.67E+01  | 8.91E+00 | 1.84E+00 | -3.74E+01 | 1.64E+02 | 1.76E+00 | 1.67E-04 | 3.03E+06 | 3.03E+06 |
| prispaci  | M_Ne | 397403 | 1.54E-01 | -4.20E+01 | 8.65E+01 | 3.00E+01 | -1.31E+01 | 1.30E+02 | 1.48E+00 | 1.29E-04 | 4.91E+06 | 4.91E+06 |
| protinou  | F_As | 5649   | 7.59E-01 | 3.01E+01  | 1.19E+01 | 1.86E+00 | -2.07E+01 | 1.44E+02 | 2.24E+00 | 1.22E-03 | 5.26E+04 | 5.26E+04 |
| protmucr  | M_Rp | 160821 | 1.19E-01 | 6.87E+01  | 5.46E+01 | 8.15E-01 | -2.97E+02 | 1.36E+03 | 1.43E+00 | 2.11E-05 | 2.81E+06 | 2.81E+06 |
| prunmume  | P_Eu | 111219 | 5.10E-01 | 4.18E+01  | 5.65E+01 | 2.47E+00 | -1.88E+02 | 5.19E+02 | 2.24E+00 | 5.83E-05 | 1.45E+06 | 1.45E+06 |
| pseuanta  | F_Ba | 4742   | 6.86E-01 | -2.82E+02 | 3.59E+02 | 2.15E+01 | -6.37E+02 | 9.00E+02 | 6.77E+00 | 8.69E-04 | 5.30E+04 | 5.31E+04 |
| pseuhumi  | M_Av | 170757 | 1.12E-01 | 5.25E+01  | 3.92E+01 | 1.74E+00 | -6.87E+01 | 7.99E+02 | 1.09E+00 | 2.13E-05 | 2.92E+06 | 2.92E+06 |
| pseuhype  | F_As | 23929  | 7.27E-01 | 3.07E+01  | 2.03E+01 | 4.25E+00 | -1.37E+01 | 9.50E+01 | 2.09E+00 | 4.20E-04 | 2.03E+05 | 2.03E+05 |
| pseumult  | O_St | 1467   | 6.31E-03 | -1.29E+02 | 1.71E+02 | 1.46E+01 | 2.46E+01  | 1.14E+02 | 2.05E+00 | 1.35E-03 | 1.73E+04 | 1.73E+04 |
| ptergutt  | M_Av | 109420 | 8.09E-02 | 6.28E+01  | 3.97E+01 | 1.21E+00 | -2.07E+02 | 9.58E+02 | 1.45E+00 | 3.00E-05 | 1.84E+06 | 1.84E+06 |
| puccgram  | F_Ba | 72855  | 5.57E-01 | -7.87E+01 | 1.80E+02 | 2.66E+00 | -3.02E+02 | 3.78E+02 | 3.00E+01 | 2.13E-04 | 7.94E+05 | 7.94E+05 |
| pucstri   | F_Ba | 48336  | 3.85E-01 | -2.10E+01 | 9.00E+01 | 1.69E+00 | 5.38E+00  | 7.07E+01 | 5.69E+00 | 3.19E-04 | 4.94E+05 | 4.94E+05 |
| puncctri  | F_Ba | 71494  | 8.80E-01 | 1.66E+01  | 3.71E+01 | 7.30E+00 | -8.83E+00 | 8.69E+01 | 1.68E+00 | 2.76E-04 | 5.44E+05 | 5.44E+05 |
| pyncoccc  | F_Ba | 71729  | 8.95E-01 | 2.05E+01  | 3.48E+01 | 6.21E+00 | -2.58E+01 | 1.15E+02 | 1.90E+00 | 3.54E-04 | 5.54E+05 | 5.54E+05 |
| pyncsang  | F_Ba | 77196  | 8.84E-01 | 1.80E+01  | 3.72E+01 | 6.74E+00 | -2.52E+01 | 1.09E+02 | 1.83E+00 | 3.38E-04 | 6.00E+05 | 6.00E+05 |
| pygoadal  | M_Av | 132458 | 6.58E-02 | 6.01E+01  | 3.92E+01 | 1.48E+00 | -1.26E+02 | 9.64E+02 | 1.15E+00 | 2.20E-05 | 2.31E+06 | 2.31E+06 |
| pyrespec  | F_As | 31187  | 7.43E-01 | 3.23E+01  | 1.83E+01 | 4.01E+00 | -2.16E+01 | 1.04E+02 | 2.29E+00 | 3.40E-04 | 2.61E+05 | 2.61E+05 |
| pyroconf  | F_As | 22013  | 6.79E-01 | 3.50E+01  | 1.88E+01 | 2.92E+00 | -4.04E+01 | 1.33E+02 | 2.32E+00 | 4.12E-04 | 2.06E+05 | 2.06E+05 |
| pyrubret  | P_Eu | 166799 | 4.46E-01 | 3.55E+01  | 6.11E+01 | 3.04E+00 | -1.14E+02 | 4.01E+02 | 1.82E+00 | 4.73E-05 | 2.19E+06 | 2.19E+06 |
| pythapha  | O_St | 15264  | 4.29E-01 | -2.24E+00 | 6.61E+01 | 1.14E+00 | -9.70E+01 | 1.59E+02 | 3.00E+01 | 7.33E-04 | 1.50E+05 | 1.50E+05 |
| pytharrh  | O_St | 21747  | 5.84E-01 | -6.38E+01 | 1.50E+02 | 2.43E+00 | -1.20E+02 | 1.88E+02 | 3.00E+01 | 4.68E-04 | 2.29E+05 | 2.29E+05 |
| pythbivi  | M_Rp | 165393 | 1.02E-01 | 6.90E+01  | 5.33E+01 | 8.12E-01 | -2.68E+02 | 1.33E+03 | 1.39E+00 | 2.03E-05 | 2.90E+06 | 2.90E+06 |
| pythirre  | O_St | 24970  | 3.41E-01 | -3.68E+01 | 1.12E+02 | 2.04E+00 | -2.71E+02 | 3.58E+02 | 3.00E+01 | 3.07E-04 | 2.49E+05 | 2.49E+05 |
| pythiway  | O_St | 25153  | 6.46E-01 | -2.35E+02 | 3.13E+02 | 3.00E+01 | -1.73E+02 | 2.80E+02 | 3.13E+00 | 5.67E-04 | 2.56E+05 | 2.56E+05 |
| pythulti  | O_St | 22103  | 2.79E-01 | -1.97E+01 | 9.38E+01 | 1.51E+00 | -2.32E+02 | 3.13E+02 | 3.00E+01 | 2.94E-04 | 2.14E+05 | 2.14E+05 |
| pythvexa  | O_St | 22159  | 3.76E-01 | -1.65E+01 | 8.35E+01 | 1.66E+00 | -9.85E+01 | 1.68E+02 | 2.36E+01 | 5.71E-04 | 2.11E+05 | 2.11E+05 |
| ramarube  | F_Ba | 112962 | 1.62E-01 | -2.01E+01 | 7.57E+01 | 2.34E+00 | -3.29E+00 | 5.61E+01 | 1.12E+01 | 2.09E-04 | 8.58E+05 | 8.58E+05 |
| retifilo  | O_Rh | 59970  | 1.95E-01 | -1.74E+02 | 2.01E+02 | 3.00E+01 | -4.63E+02 | 5.42E+02 | 1.63E+01 | 1.22E-03 | 6.17E+05 | 6.17E+05 |
| rhinroxe  | M_Mm | 197465 | 2.33E-01 | 6.42E+01  | 7.80E+01 | 7.17E-01 | -2.53E+02 | 1.77E+03 | 1.07E+00 | 2.00E-05 | 3.63E+06 | 3.63E+06 |
| rhizmicr  | F_Mu | 36264  | 9.26E-01 | -2.43E+00 | 5.44E+01 | 1.09E+01 | -3.00E+00 | 6.16E+01 | 1.64E+00 | 4.51E-04 | 2.58E+05 | 2.58E+05 |
| rhizoryz  | F_Mu | 39870  | 6.73E-01 | -1.10E+02 | 1.62E+02 | 3.00E+01 | -5.97E+01 | 1.46E+02 | 3.15E+00 | 4.81E-04 | 3.52E+05 | 3.53E+05 |
| rhizola   | F_Ba | 72521  | 8.94E-01 | -3.97E+01 | 9.20E+01 | 2.18E+01 | 3.79E+01  | 2.62E+01 | 8.97E-01 | 3.15E-04 | 5.02E+05 | 5.02E+05 |
| rhizvini  | F_Mu | 69495  | 8.93E-01 | 3.44E+00  | 4.82E+01 | 1.14E+01 | -6.57E+00 | 7.21E+01 | 1.61E+00 | 3.06E-04 | 4.95E+05 | 4.95E+05 |
| rhodgram  | F_Ba | 31116  | 8.82E-01 | 3.83E+01  | 3.29E+01 | 3.02E+00 | -1.15E+01 | 1.32E+02 | 1.32E+00 | 3.12E-04 | 2.87E+05 | 2.87E+05 |
| rhodminu  | F_Ba | 37743  | 8.98E-01 | 3.23E+01  | 3.26E+01 | 3.33E+00 | -8.76E+01 | 1.91E+02 | 3.08E+00 | 2.56E-04 | 3.29E+05 | 3.29E+05 |
| rhodspec  | F_Ba | 35187  | 8.61E-01 | 4.04E+01  | 2.84E+01 | 2.78E+00 | -1.83E+01 | 9.96E+01 | 1.75E+00 | 3.93E-04 | 3.18E+05 | 3.18E+05 |
| rhotodor  | F_Ba | 42374  | 8.01E-01 | 4.12E+01  | 1.73E+01 | 3.42E+00 | -4.12E+01 | 1.25E+02 | 3.61E+00 | 8.93E-04 | 3.37E+05 | 3.37E+05 |
| rhytrufu  | F_As | 26024  | 7.01E-01 | 4.39E+00  | 4.77E+01 | 9.95E+00 | 8.87E+00  | 8.07E+01 | 1.64E+00 | 4.06E-04 | 2.27E+05 | 2.27E+05 |
| rickmell  | F_Ba | 86718  | 9.04E-01 | -3.03E+01 | 8.30E+01 | 2.05E+01 | -1.91E+01 | 9.17E+01 | 1.90E+00 | 3.83E-04 | 6.02E+05 | 6.02E+05 |
| rozeallo  | F_Cr | 19910  | 5.58E-02 | -5.41E+01 | 7.55E+01 | 2.04E+01 | 2.59E+01  | 1.08E+00 | 4.99E-01 | 2.09E-02 | 1.39E+05 | 1.39E+05 |
| sackkowa  | M_He | 137070 | 1.69E-01 | 6.89E+01  | 7.46E+01 | 9.98E-01 | -1.10E+02 | 7.08E+02 | 1.32E+00 | 2.78E-05 | 2.23E+06 | 2.23E+06 |
| saccprot  | F_As | 18953  | 5.82E-01 | 3.33E+01  | 2.00E+01 | 3.63E+00 | -7.04E+00 | 8.41E+01 | 1.82E+00 | 3.73E-04 | 1.79E+05 | 1.79E+05 |
| saimboli  | M_Mm | 188169 | 2.35E-01 | 6.45E+01  | 7.82E+01 | 7.05E-01 | -2.56E+02 | 1.81E+03 | 1.07E+00 | 2.04E-05 | 3.47E+06 | 3.47E+06 |
| saitcomp  | F_As | 9150   | 8.35E-01 | -2.76E+01 | 8.04E+01 | 2.02E+01 | -1.18E+01 | 7.95E+01 | 1.71E+00 | 6.30E-04 | 6.83E+04 | 6.83E+04 |
| salmsala  | M_Fs | 404053 | 6.96E-01 | 5.14E+01  | 1.35E+02 | 9.57E-01 | -5.90E+02 | 2.57E+03 | 1.25E+00 | 1.82E-05 | 6.61E+06 | 6.61E+06 |
| salprose  | O_Op | 173393 | 7.88E-02 | -7.35E+01 | 2.39E+02 | 1.56E+00 | -1.52E+03 | 1.71E+03 | 3.00E+01 | 1.35E-04 | 2.02E+06 | 2.02E+06 |
| salvmilt  | P_Eu | 4009   | 5.38E-01 | 3.11E+01  | 5.30E+01 | 3.35E+00 | -2.81E+02 | 6.36E+02 | 2.46E+00 | 5.57E-04 | 5.09E+05 | 5.09E+05 |
| sapridcl  | O_St | 54471  | 9.52E-01 | -7.03E+01 | 1.16E+02 | 3.00E+01 | 1.16E+01  | 5.56E+01 | 9.62E-01 | 7.71E-04 | 3.50E+05 | 3.51E+05 |
| saprrpara | O_St | 58891  | 1.10E-01 | 1.23E+01  | 3.42E+01 | 1.11E+00 | -7.91E+01 | 1.26E+02 | 3.00E+01 | 7.50E-04 | 4.12E+05 | 4.12E+05 |
| sarcneur  | O_Al | 35950  | 2.14E-01 | -1.44E+02 | 3.73E+02 | 1.75E+00 | -6.05E+03 | 7.17E+03 | 1.11E+01 | 8.56E-05 | 5.84E+05 | 5.84E+05 |
| sarcscab  | M_Ar | 21448  | 6.09E-01 | 2.26E+01  | 3.99E+01 | 4.19E+00 | -2.78E+00 | 7.84E+01 | 1.16E+00 | 2.83E-04 | 2.22E+05 | 2.22E+05 |
| schicomm  | F_Ba | 73976  | 8.01E-01 | 1.65E+01  | 3.44E+01 | 9.23E+00 | -1.55E+01 | 9.76E+01 | 1.92E+00 | 3.45E-04 | 5.70E+05 | 5.70E+05 |
| schicryo  | F_As | 5864   | 6.18E-01 | -6.02E+01 | 1.07E+02 | 1.47E+01 | -8.29E+01 | 1.58E+02 | 3.66E+00 | 7.91E-04 | 5.46E+04 | 5.46E+04 |
| schihaem  | M_Pl | 104990 | 1.21E-01 | 2.73E+01  | 1.16E+01 | 1.00E+00 | -1.45E+03 | 2.96E+03 | 2.59E+00 | 7.12E-05 | 1.81E+06 | 1.81E+06 |
| schijapa  | M_Pl | 46464  | 2.01E-01 | 2.43E+01  | 1.18E+01 | 1.45E+00 | -1.15E+03 | 2.44E+03 | 2.36E+00 | 1.15E-04 | 7.69E+05 | 7.69E+05 |
| schijapo  | F_As | 5369   | 6.87E-01 | -1.10E+01 | 5.88E+01 | 7.01E+00 | -7.76E+01 | 1.66E+02 | 3.82E+00 | 9.80E-04 | 4.98E+04 | 4.98E+04 |
| schiocto  | F_As | 5504   | 7.79E-01 | -3.37E+00 | 5.04E+01 | 6.26E+00 | -2.65E+02 | 3.78E+02 | 7.26E+00 | 1.03E-03 | 4.98E+04 | 4.98E+04 |
| schipara  | F_Ba | 108900 | 8.90E-01 | 9.13E+00  | 4.52E+01 | 8.41E+00 | -3.20E+01 | 1.08E+02 | 2.32E+00 | 1.89E-04 | 8.22E+05 | 8.22E+05 |
| schipomb  | F_As | 5241   | 7.78E-01 |           |          |          |           |          |          |          |          |          |

|            |      |        |          |           |          |          |           |          |          |          |          |          |
|------------|------|--------|----------|-----------|----------|----------|-----------|----------|----------|----------|----------|----------|
| spodfrug   | M_In | 7702   | 1.34E-01 | 2.15E+01  | 6.02E+01 | 7.48E+00 | -3.97E+01 | 3.67E+02 | 1.28E+00 | 2.67E-04 | 1.15E+05 | 1.15E+05 |
| sporfime   | F_As | 21063  | 7.34E-01 | 3.06E+01  | 1.83E+01 | 4.67E+00 | -1.75E+01 | 9.60E+01 | 2.15E+00 | 5.33E-04 | 1.73E+05 | 1.73E+05 |
| sporrell   | F_Ba | 2899   | 7.68E-01 | -2.33E+02 | 3.13E+02 | 2.88E+01 | -1.12E+02 | 2.60E+02 | 2.59E+00 | 1.04E-03 | 2.83E+04 | 2.83E+04 |
| sporrose   | F_Ba | 33904  | 6.75E-01 | -4.49E+00 | 7.49E+01 | 8.60E+00 | -5.60E+01 | 1.39E+02 | 2.46E+00 | 2.74E-04 | 3.24E+05 | 3.24E+05 |
| stagspec   | F_As | 27882  | 7.43E-01 | 3.15E+01  | 1.89E+01 | 4.44E+00 | -2.28E+01 | 1.06E+02 | 2.24E+00 | 3.96E-04 | 2.31E+05 | 2.32E+05 |
| sterhirs   | F_Ba | 82537  | 8.50E-01 | 3.08E+01  | 2.95E+01 | 3.33E+00 | -1.67E+01 | 1.12E+02 | 1.54E+00 | 1.80E-04 | 7.37E+05 | 7.37E+05 |
| strimari   | M_In | 76264  | 6.84E-01 | -3.72E+00 | 6.46E+01 | 9.40E+00 | -3.63E+01 | 2.61E+02 | 1.16E+00 | 1.15E-04 | 8.09E+05 | 8.09E+05 |
| stropurp   | M_Ec | 282768 | 5.00E-01 | -6.51E+02 | 1.21E+03 | 5.58E+00 | -2.61E+02 | 1.17E+03 | 1.30E+00 | 2.05E-05 | 4.59E+06 | 4.59E+06 |
| strucame   | M_Av | 155047 | 6.05E-02 | 5.60E+01  | 4.31E+01 | 1.69E+00 | -1.06E+02 | 9.89E+02 | 1.09E+00 | 1.86E-05 | 2.74E+06 | 2.74E+06 |
| sturvulg   | M_Av | 159269 | 1.01E-01 | 5.27E+01  | 3.83E+01 | 1.88E+00 | -7.86E+01 | 8.08E+02 | 1.08E+00 | 2.17E-05 | 2.73E+06 | 2.73E+06 |
| suilbrev   | F_Ba | 90744  | 8.76E-01 | 3.43E+00  | 4.80E+01 | 1.14E+01 | -3.56E+00 | 6.58E+01 | 1.51E+00 | 3.34E-04 | 6.58E+05 | 6.58E+05 |
| suilulte   | F_Ba | 153215 | 8.14E-01 | 2.16E+01  | 3.07E+01 | 5.87E+00 | -8.83E+00 | 9.09E+01 | 1.74E+00 | 1.61E-04 | 1.25E+06 | 1.25E+06 |
| sus_scro   | M_Mm | 199680 | 2.09E-01 | 6.44E+01  | 7.32E+01 | 7.33E-01 | -2.10E+02 | 1.61E+03 | 1.03E+00 | 1.83E-05 | 3.67E+06 | 3.67E+06 |
| sympkoch   | F_As | 26188  | 7.87E-01 | 2.70E+01  | 2.53E+01 | 4.55E+00 | -8.29E+00 | 7.90E+01 | 2.16E+00 | 3.86E-04 | 2.14E+05 | 2.14E+05 |
| taengutt   | M_Av | 141507 | 8.75E-02 | 5.34E+01  | 4.03E+01 | 1.77E+00 | -9.52E+01 | 8.18E+02 | 1.15E+00 | 2.34E-05 | 2.42E+06 | 2.42E+06 |
| takirubr   | M_Fs | 207893 | 4.63E-01 | 4.59E+01  | 3.59E+01 | 2.46E+00 | -1.42E+01 | 3.39E+02 | 1.10E+00 | 5.80E-05 | 2.80E+06 | 2.80E+06 |
| talaacul   | F_As | 33775  | 8.49E-01 | 2.46E+01  | 3.05E+01 | 4.46E+00 | -3.42E+00 | 7.80E+01 | 1.63E+00 | 2.80E-04 | 2.80E+05 | 2.80E+05 |
| talamarn   | F_As | 21410  | 8.32E-01 | 1.95E+01  | 3.64E+01 | 5.33E+00 | -3.26E+01 | 1.04E+02 | 2.21E+00 | 4.23E-04 | 1.79E+05 | 1.79E+05 |
| taphdefo   | F_As | 2903   | 2.64E-01 | 2.43E+01  | 2.20E+01 | 9.28E-01 | -4.61E+01 | 9.25E+01 | 3.00E+01 | 1.62E-03 | 2.18E+04 | 2.19E+04 |
| taureynt   | M_Av | 111645 | 8.37E-02 | 6.43E+01  | 3.89E+01 | 1.14E+00 | -2.05E+02 | 9.96E+02 | 1.40E+00 | 2.73E-05 | 1.89E+06 | 1.89E+06 |
| teranubi   | F_As | 16272  | 7.56E-01 | 2.98E+01  | 2.50E+01 | 4.14E+00 | -2.80E+01 | 1.33E+02 | 1.98E+00 | 3.00E-04 | 1.46E+05 | 1.46E+05 |
| terfboud   | F_As | 35620  | 7.31E-01 | 3.38E+01  | 2.42E+01 | 2.72E+00 | -4.43E+01 | 1.25E+02 | 2.35E+00 | 2.33E-04 | 3.34E+05 | 3.34E+05 |
| tetrurti   | M_Ar | 91330  | 4.30E-01 | 7.68E+00  | 6.27E+01 | 5.10E+00 | 9.39E+00  | 1.59E+02 | 9.12E-01 | 8.03E-05 | 1.16E+06 | 1.16E+06 |
| thalocea   | O_St | 43776  | 3.01E-01 | -2.03E+02 | 2.74E+02 | 3.00E+01 | 1.46E+00  | 9.77E+01 | 1.74E+00 | 5.21E-04 | 4.84E+05 | 4.84E+05 |
| thalpseu   | O_St | 18937  | 4.21E-01 | -3.67E+01 | 1.13E+02 | 2.06E+00 | 4.22E+01  | 4.20E+01 | 3.70E+00 | 6.27E-04 | 1.99E+05 | 1.99E+05 |
| thamsirt   | M_Rp | 92316  | 1.21E-01 | 6.78E+01  | 5.37E+01 | 8.30E-01 | -2.58E+02 | 1.44E+03 | 1.26E+00 | 2.80E-05 | 1.65E+06 | 1.65E+06 |
| theiorie   | O_Al | 12287  | 3.63E-01 | 2.77E+01  | 3.29E+00 | 1.38E+00 | -6.77E+01 | 1.49E+02 | 3.09E+00 | 1.03E-03 | 1.24E+05 | 1.24E+05 |
| thelcall   | M_Ne | 55136  | 1.68E-01 | 4.66E+01  | 4.50E+01 | 1.43E+00 | -1.92E+02 | 3.75E+02 | 3.45E+00 | 1.17E-04 | 7.02E+05 | 7.02E+05 |
| thelkita   | M_Cn | 29945  | 9.94E-01 | 1.99E+01  | 1.56E+00 | 4.33E-01 | -4.58E+01 | 6.65E+01 | 2.03E+01 | 8.26E-03 | 2.50E+05 | 2.50E+05 |
| thelmicr   | F_As | 17049  | 6.05E-01 | 3.87E+01  | 1.37E+01 | 2.61E+00 | -3.27E+01 | 1.12E+02 | 2.16E+00 | 6.31E-04 | 1.61E+05 | 1.61E+05 |
| theraura   | F_As | 20351  | 7.62E-01 | 3.72E+01  | 2.20E+01 | 2.12E+00 | 8.18E-01  | 7.66E+01 | 1.49E+00 | 3.19E-04 | 1.94E+05 | 1.94E+05 |
| thieanta   | F_As | 19056  | 6.84E-01 | 2.93E+01  | 2.90E+01 | 3.46E+00 | -1.29E+01 | 9.92E+01 | 1.80E+00 | 3.07E-04 | 1.82E+05 | 1.82E+05 |
| thieappe   | F_As | 27452  | 6.44E-01 | 2.69E+01  | 3.17E+01 | 3.70E+00 | -9.85E+00 | 9.02E+01 | 1.79E+00 | 2.01E-04 | 2.65E+05 | 2.65E+05 |
| thiearen   | F_As | 29077  | 7.70E-01 | 2.62E+01  | 3.44E+01 | 3.34E+00 | -2.23E+01 | 1.20E+02 | 1.88E+00 | 2.70E-04 | 2.76E+05 | 2.76E+05 |
| thiehyrc   | F_As | 24540  | 6.89E-01 | 3.10E+01  | 2.96E+01 | 2.86E+00 | -1.19E+01 | 9.60E+01 | 1.75E+00 | 2.65E-04 | 2.39E+05 | 2.39E+05 |
| thieterr   | F_As | 17866  | 7.41E-01 | 2.90E+01  | 3.53E+01 | 2.95E+00 | -1.42E+01 | 1.03E+02 | 1.75E+00 | 3.66E-04 | 1.75E+05 | 1.75E+05 |
| thozspec   | F_As | 47313  | 7.45E-01 | 2.85E+01  | 3.00E+01 | 3.51E+00 | -4.98E+00 | 8.27E+01 | 1.66E+00 | 2.53E-04 | 4.35E+05 | 4.35E+05 |
| tillanom   | F_Ba | 18237  | 8.63E-01 | -2.17E+01 | 9.40E+01 | 8.50E+00 | -7.27E+01 | 1.72E+02 | 2.49E+00 | 3.40E-04 | 1.64E+05 | 1.64E+05 |
| tillwash   | F_Ba | 26359  | 7.66E-01 | 2.80E+01  | 2.63E+01 | 5.72E+00 | -2.56E+01 | 1.36E+02 | 2.03E+00 | 7.91E-04 | 2.24E+05 | 2.24E+05 |
| tinagutt   | M_Av | 129567 | 7.82E-02 | 4.67E+01  | 4.81E+01 | 2.01E+00 | -1.24E+02 | 8.23E+02 | 1.24E+00 | 2.48E-05 | 2.19E+06 | 2.19E+06 |
| tothfusc   | F_As | 32501  | 7.18E-01 | 2.38E+01  | 2.91E+01 | 5.53E+00 | -3.19E+01 | 1.20E+02 | 2.31E+00 | 2.88E-04 | 2.84E+05 | 2.84E+05 |
| tramjub    | F_Ba | 78152  | 8.89E-01 | 1.86E+01  | 3.63E+01 | 6.47E+00 | -2.26E+01 | 1.09E+02 | 1.84E+00 | 3.02E-04 | 6.07E+05 | 6.07E+05 |
| tremPERT   | F_As | 35064  | 7.07E-01 | 3.04E+01  | 2.04E+01 | 4.46E+00 | -1.96E+01 | 1.02E+02 | 2.20E+00 | 3.63E-04 | 3.00E+05 | 3.00E+05 |
| tricable   | F_Ba | 82775  | 8.76E-01 | 1.50E+01  | 3.96E+01 | 7.38E+00 | -2.22E+01 | 9.84E+01 | 1.96E+00 | 2.23E-04 | 6.37E+05 | 6.37E+05 |
| tricaspe   | F_As | 23471  | 7.85E-01 | 2.78E+01  | 3.40E+01 | 3.10E+00 | -2.87E+01 | 1.18E+02 | 1.85E+00 | 2.84E-04 | 2.23E+05 | 2.23E+05 |
| tricatro   | F_As | 20382  | 7.13E-01 | 2.23E+01  | 3.83E+01 | 3.99E+00 | -1.04E+01 | 1.00E+02 | 1.63E+00 | 3.00E-04 | 1.96E+05 | 1.97E+05 |
| trichisp   | F_As | 23234  | 7.67E-01 | 2.80E+01  | 1.94E+01 | 3.94E+00 | -4.71E+00 | 8.37E+01 | 1.70E+00 | 4.16E-04 | 1.95E+05 | 1.95E+05 |
| tricharz   | F_As | 26905  | 7.94E-01 | 2.70E+01  | 3.32E+01 | 3.47E+00 | -3.16E+01 | 1.22E+02 | 1.86E+00 | 2.37E-04 | 2.50E+05 | 2.50E+05 |
| tricloug   | F_As | 21497  | 7.16E-01 | 3.27E+01  | 2.97E+01 | 2.70E+00 | -8.12E+00 | 1.01E+02 | 1.52E+00 | 2.92E-04 | 2.13E+05 | 2.13E+05 |
| tricnati   | M_Ne | 50698  | 6.31E-01 | -4.24E+00 | 6.49E+01 | 6.13E+00 | -5.40E+01 | 2.14E+02 | 1.80E+00 | 1.80E-04 | 5.50E+05 | 5.50E+05 |
| tricolore  | F_Ba | 21907  | 7.31E-01 | 2.65E+01  | 8.14E+00 | 1.77E+00 | -3.11E+01 | 1.21E+02 | 2.16E+00 | 9.96E-04 | 1.94E+05 | 1.94E+05 |
| tricipeta  | F_As | 3549   | 6.66E-01 | 4.39E+00  | 3.85E+01 | 7.90E+00 | -7.64E-01 | 6.78E+01 | 1.29E+00 | 9.17E-04 | 3.20E+04 | 3.21E+04 |
| tricipret  | M_In | 62295  | 5.76E-01 | -2.07E+02 | 2.80E+02 | 3.00E+01 | 5.40E+00  | 3.25E+02 | 8.37E-01 | 1.43E-04 | 7.77E+05 | 7.77E+05 |
| tricrees   | F_As | 18049  | 6.27E-01 | 3.01E+01  | 3.40E+01 | 2.85E+00 | -2.11E+01 | 1.10E+02 | 2.00E+00 | 3.30E-04 | 1.82E+05 | 1.82E+05 |
| tricroubr  | F_As | 18104  | 7.66E-01 | 1.23E+01  | 4.85E+01 | 5.64E+00 | -7.25E+01 | 1.59E+02 | 3.14E+00 | 3.68E-04 | 1.63E+05 | 1.63E+05 |
| tricrover  | F_As | 12529  | 5.20E-01 | -3.37E+02 | 4.12E+02 | 1.06E+01 | -1.20E+02 | 1.81E+02 | 2.53E+01 | 9.84E-04 | 1.19E+05 | 1.19E+05 |
| tricrovire | F_As | 23801  | 6.55E-01 | 1.57E+01  | 4.45E+01 | 5.11E+00 | -1.16E+01 | 9.52E+01 | 1.83E+00 | 2.96E-04 | 2.29E+05 | 2.29E+05 |
| tringuia   | F_As | 26210  | 7.33E-01 | 3.47E+01  | 2.35E+01 | 2.57E+00 | -6.89E+01 | 1.64E+02 | 2.86E+00 | 3.67E-04 | 2.48E+05 | 2.48E+05 |
| tritaest   | P_Mo | 286887 | 5.86E-01 | 3.74E+01  | 5.33E+01 | 2.94E+00 | -2.51E+02 | 6.29E+02 | 2.39E+00 | 6.96E-05 | 3.61E+06 | 3.61E+06 |
| tritspec   | F_Ba | 34685  | 9.47E-01 | 2.34E+01  | 3.95E+01 | 4.40E+00 | -2.79E+01 | 1.12E+02 | 2.03E+00 | 4.43E-04 | 2.84E+05 | 2.84E+05 |
| trypelut   | F_As | 26297  | 7.20E-01 | 2.76E+01  | 2.60E+01 | 4.35E+00 | -2.45E+01 | 1.09E+02 | 2.33E+00 | 3.14E-04 | 2.32E+05 | 2.32E+05 |
| tubemela   | F_As | 11366  | 1.39E-01 | 3.70E+00  | 5.76E+01 | 1.31E+00 | 3.50E+01  | 2.31E+01 | 2.31E+00 | 5.85E-04 | 1.02E+05 | 1.02E+05 |
| tulacalo   | F_Ba | 75950  | 8.52E-01 | 1.51E+01  | 4.36E+01 | 6.42E+00 | 6.75E-01  | 8.60E+01 | 1.15E+00 | 2.29E-04 | 6.44E+05 | 6.44E+05 |
| tupachin   | M_Mm | 179244 | 2.10E-01 | 6.14E+01  | 7.51E+01 | 7.57E-01 | -2.74E+02 | 1.86E+03 | 1.05E+00 | 1.92E-05 | 3.33E+06 | 3.33E+06 |
| tytoalba   | M_Av | 104335 | 6.41E-02 | 6.52E+01  | 3.62E+01 | 1.24E+00 | -2.25E+02 | 1.02E+03 | 1.45E+00 | 2.85E-05 | 1.77E+06 | 1.77E+06 |
| umberama   | F_Mu | 39830  | 9.29E-01 | 2.07E+01  | 4.63E+01 | 6.12E+00 | -1.09E+02 | 2.10E+02 | 3.71E+00 | 4.02E-04 | 3.16E+05 | 3.16E+05 |
| uncirees   | F_As | 16178  | 5.74E-01 | -1.03E+01 | 6.71E+01 | 1.00E+01 | -8.81E+01 | 1.75E+02 | 3.09E+00 | 4.58E-04 | 1.58E+05 | 1.58E+05 |
| valelaxa   | F_As | 17971  | 8.54E-01 | 2.85E+01  | 3.40E+01 | 2.99E+00 | -3.15E+01 | 1.49E+02 | 1.77E+00 | 3.11E-04 | 1.69E+05 | 1.69E+05 |
| verrenal   | F_As | 30630  | 6.81E-01 | 3.08E+01  | 2.05E+01 | 4.21E+00 | -1.55E+01 | 9.73E+01 | 2.05E+00 | 3.49E-04 | 2.70E+05 | 2.70E+05 |
| vertalfa   | F_As | 18428  | 6.65E-01 | 3.84E+01  | 1.87E+01 | 2.09E+00 | -6.98E+01 | 1.96E+02 | 2.28E+00 | 4.78E-04 | 1.88E+05 | 1.88E+05 |
| vertdahl   | F_As | 19022  | 7.16E-01 | 3.62E+01  | 2.03E+01 | 2.49E+00 | -5.14E+01 | 1.55E+02 | 2.29E+00 | 3.93E-04 | 1.82E+05 | 1.82E+05 |
| vignradi   | P_Eu | 132285 | 4.70E-01 | 4.59E+01  | 4.64E+01 | 2.31E+00 | -1.13E+02 | 4.96E+02 | 1.63E+00 | 5.78E-05 | 1.80E+06 | 1.80E+06 |
| vitrbas    | O_Al | 173000 | 9.72E-01 | -1.10E+02 | 1.85E+02 | 1.14E+01 | -1.09E+03 | 1.37E+03 | 1.31E+01 | 1.49E-04 | 1.58E+06 | 1.58E+06 |
| wallicht   | F_Ba | 11664  | 9.29E-01 | 6.10E-01  | 4.63E+01 | 1.37E+01 | -1.62E+00 | 8.45E+01 | 1.36E+00 | 1.32E-03 | 7.59E+04 | 7.59E+04 |
| wasmaurc   | M_In | 83247  | 2.53E-01 | -5.18E+01 | 1.34E+02 | 1.07E+01 | 1.97E+01  | 2.50E+02 | 8.65E-01 | 5.48E-05 | 1.22E+06 | 1.22E+06 |
| westorna   | F_As | 22208  | 7.00E-01 | 3.34E+01  | 1.80E+01 | 3.61E+00 | -1.92E+01 | 1.01E+02 | 2.22E+00 | 3.86E-04 | 1.94E+05 | 1.94E+05 |
| wickanom   | F_As | 2865   | 5.16E-01 | 7.07E+00  | 6.75E+01 | 9.21E-01 | -6.93E+01 | 1.23E+02 | 3.00E+01 | 9.28E-04 | 3.02E+04 | 3.02E+04 |
| wilcmiko   | F_As | 31921  | 7.30E-01 | 4.87E+00  | 4.88E+01 | 8        |           |          |          |          |          |          |



|           |      |        |          |           |          |          |           |          |          |          |           |          |          |          |          |          |
|-----------|------|--------|----------|-----------|----------|----------|-----------|----------|----------|----------|-----------|----------|----------|----------|----------|----------|
| ailumela  | M_Mm | 190361 | 9.55E-02 | 6.02E+01  | 3.62E+01 | 1.52E+00 | -2.98E+02 | 5.76E+02 | 3.55E+00 | 1.35E-01 | -3.24E+02 | 1.78E+03 | 1.16E+00 | 1.58E-05 | 3.45E+06 | 3.45E+06 |
| altebras  | F_As | 17748  | 5.06E-01 | 3.40E+01  | 1.65E+01 | 4.18E+00 | -1.25E+01 | 7.87E+01 | 2.27E+00 | 3.48E-01 | -3.68E+02 | 5.92E+02 | 4.69E+00 | 4.67E-04 | 1.75E+05 | 1.75E+05 |
| amarhytop | P_Eu | 99043  | 3.22E-01 | 3.16E+01  | 5.72E+01 | 3.97E+00 | -1.15E+02 | 3.41E+02 | 2.01E+00 | 2.54E-01 | -4.40E+02 | 1.27E+03 | 2.25E+00 | 4.46E-05 | 1.44E+06 | 1.44E+06 |
| anabotic  | P_Am | 82359  | 3.05E-01 | 4.63E+01  | 5.74E+01 | 1.98E+00 | -3.62E+01 | 2.56E+02 | 1.26E+00 | 2.33E-01 | -1.53E+02 | 9.88E+02 | 1.19E+00 | 3.87E-05 | 1.29E+06 | 1.29E+06 |
| anancmc   | P_Mo | 124658 | 7.11E-02 | 7.65E+00  | 4.03E+01 | 1.17E+00 | 5.06E+01  | 4.51E+01 | 1.97E+00 | 3.40E-01 | -1.42E+02 | 6.06E+02 | 1.73E+00 | 4.50E-05 | 1.80E+06 | 1.80E+06 |
| ancyceyl  | M_Ne | 201928 | 4.70E-01 | 4.12E+01  | 1.93E+01 | 1.97E+00 | -4.46E+00 | 2.04E+02 | 1.27E+00 | 3.05E-01 | -8.62E+02 | 1.93E+03 | 2.51E+00 | 7.16E-05 | 2.69E+06 | 2.69E+06 |
| ancyduod  | M_Ne | 105752 | 3.51E-02 | -1.73E+02 | 2.12E+02 | 1.35E+01 | 4.60E+01  | 1.84E+01 | 1.11E+00 | 5.72E-01 | -2.70E+02 | 6.28E+02 | 2.29E+00 | 1.54E-04 | 1.34E+06 | 1.34E+06 |
| angicant  | M_Ne | 47798  | 1.14E-01 | -1.11E+02 | 1.81E+02 | 4.21E+00 | 4.34E+01  | 2.54E+01 | 1.22E+00 | 4.32E-01 | -2.04E+02 | 7.16E+02 | 1.73E+00 | 9.61E-05 | 6.63E+05 | 6.63E+05 |
| angicost  | M_Ne | 40656  | 4.47E-02 | -6.16E+02 | 6.60E+02 | 3.00E+01 | 4.48E+01  | 3.07E+01 | 9.29E-01 | 5.65E-01 | -1.22E+03 | 1.87E+03 | 3.62E+00 | 1.17E-04 | 5.68E+05 | 5.68E+05 |
| anopdari  | M_In | 37365  | 5.97E-01 | -2.42E+01 | 9.60E+01 | 9.53E+00 | -4.83E+01 | 2.71E+02 | 1.28E+00 | 2.33E-01 | -2.42E+04 | 2.58E+04 | 3.00E+01 | 9.47E-05 | 4.61E+05 | 4.61E+05 |
| anopgamt  | M_In | 83754  | 5.32E-01 | -4.06E+01 | 1.13E+02 | 1.09E+01 | -1.49E+01 | 1.71E+02 | 1.25E+00 | 2.54E-01 | -3.54E+02 | 2.06E+03 | 1.21E+00 | 6.75E-05 | 1.10E+06 | 1.10E+06 |
| anopsine  | M_In | 23063  | 5.79E-01 | 9.80E+00  | 6.00E+01 | 6.80E+00 | -2.71E+01 | 3.19E+02 | 1.04E+00 | 2.79E-01 | -4.61E+02 | 2.68E+03 | 1.33E+00 | 1.28E-04 | 2.97E+05 | 2.97E+05 |
| aphaasta  | O_St | 57224  | 6.73E-01 | 1.31E-01  | 5.30E+01 | 6.09E+00 | -2.78E+02 | 3.57E+02 | 9.41E+00 | 1.86E-01 | -4.02E+01 | 4.24E+02 | 2.48E+00 | 1.69E-04 | 5.82E+05 | 5.82E+05 |
| apisdors  | M_In | 64195  | 4.49E-01 | 5.37E+00  | 7.24E+01 | 4.96E+00 | -5.94E+00 | 2.70E+02 | 1.09E+00 | 4.35E-01 | -3.00E+02 | 2.54E+03 | 9.49E-01 | 6.11E-05 | 9.03E+05 | 9.03E+05 |
| apisflor  | M_In | 64863  | 4.75E-01 | 6.54E+00  | 7.10E+01 | 4.88E+00 | 2.37E+00  | 3.11E+02 | 9.24E-01 | 4.94E-01 | 1.88E+03  | 6.21E+03 | 1.05E+00 | 6.63E-05 | 8.98E+05 | 8.98E+05 |
| apismell  | M_In | 141928 | 4.58E-01 | 5.95E+00  | 7.21E+01 | 4.83E+00 | -5.96E+00 | 2.69E+02 | 1.12E+00 | 4.29E-01 | -3.00E+02 | 2.54E+03 | 9.41E-01 | 5.28E-05 | 1.98E+06 | 1.98E+06 |
| aplakerg  | O_St | 22059  | 9.24E-01 | -2.50E+01 | 7.62E+01 | 1.75E+01 | -2.31E+02 | 3.02E+02 | 1.15E+01 | 6.62E-02 | 8.51E+01  | 2.81E+02 | 9.94E-01 | 4.67E-04 | 1.51E+05 | 1.51E+05 |
| aploprun  | F_As | 23464  | 6.82E-01 | 1.92E+01  | 3.41E+01 | 5.92E+00 | -3.18E+02 | 3.91E+02 | 1.09E+01 | 2.82E-01 | 1.14E+02  | 1.40E+02 | 1.30E+00 | 4.27E-04 | 2.08E+05 | 2.08E+05 |
| aquichry  | M_Av | 176824 | 3.35E-02 | 3.42E+01  | 5.34E+01 | 4.69E+00 | 5.47E+01  | 7.03E+01 | 1.03E+00 | 1.07E-01 | -9.53E+01 | 9.61E+02 | 1.09E+00 | 1.79E-05 | 3.08E+06 | 3.08E+06 |
| aquicoer  | P_Eu | 119001 | 5.32E-01 | -4.06E+01 | 1.13E+02 | 1.09E+01 | -1.49E+01 | 1.71E+02 | 1.25E+00 | 2.54E-01 | -3.54E+02 | 2.06E+03 | 1.21E+00 | 6.75E-05 | 1.10E+06 | 1.10E+06 |
| armigall  | F_Ba | 138043 | 8.55E-01 | -6.19E+01 | 1.13E+02 | 3.00E+01 | -7.08E+00 | 6.86E+01 | 1.67E+00 | 1.41E-01 | -5.59E+01 | 2.76E+02 | 7.57E+00 | 3.58E-04 | 9.89E+05 | 9.89E+05 |
| armimell  | F_Ba | 71611  | 8.25E-01 | -5.88E+01 | 1.10E+02 | 3.00E+01 | 2.14E+01  | 3.64E+01 | 1.66E+00 | 1.25E-01 | -1.51E+02 | 3.86E+02 | 3.08E+00 | 4.76E-04 | 5.25E+05 | 5.25E+05 |
| ascosarc  | F_As | 21551  | 7.01E-01 | 3.16E+01  | 1.95E+01 | 4.05E+00 | -1.46E+02 | 2.29E+02 | 6.97E+00 | 2.50E-01 | -1.13E+02 | 3.75E+02 | 1.63E+00 | 4.25E-04 | 1.89E+05 | 1.89E+05 |
| aspeacul  | F_As | 26591  | 7.71E-01 | 3.35E+01  | 2.50E+01 | 2.37E+00 | -8.29E+00 | 9.08E+01 | 1.56E+00 | 2.27E-01 | 6.10E+02  | 2.14E+03 | 4.73E-01 | 2.52E-04 | 2.55E+05 | 2.55E+05 |
| aspendiu  | F_As | 23489  | 7.04E-01 | 2.86E+01  | 2.45E+01 | 3.27E+00 | -1.27E+02 | 1.84E+02 | 7.52E+00 | 1.93E-01 | -2.14E+02 | 3.80E+02 | 4.36E+00 | 4.45E-04 | 2.14E+05 | 2.14E+05 |
| astymexi  | M_Fs | 198633 | 6.86E-02 | 6.74E+01  | 3.04E+01 | 1.94E+00 | 5.20E+01  | 6.74E+01 | 1.48E+00 | 2.08E-01 | -1.35E+02 | 1.10E+03 | 1.20E+00 | 2.00E-05 | 3.33E+06 | 3.33E+06 |
| atharosa  | M_In | 69737  | 5.54E-01 | -5.25E+01 | 1.32E+02 | 8.81E+00 | 6.21E+00  | 2.34E+02 | 1.04E+00 | 4.01E-01 | 5.81E+02  | 2.15E+03 | 9.64E-01 | 1.07E-04 | 8.95E+05 | 8.95E+05 |
| atraspec  | F_Ba | 81618  | 8.48E-01 | 2.05E+01  | 3.04E+01 | 5.70E+00 | 4.37E+00  | 6.87E+01 | 1.07E+00 | 1.44E-01 | 3.37E+01  | 2.98E+02 | 3.38E+00 | 1.81E-04 | 6.64E+05 | 6.64E+05 |
| atraceph  | M_In | 58562  | 2.92E-01 | -3.28E+01 | 1.11E+02 | 8.61E+00 | 1.34E+01  | 2.50E+02 | 9.36E-01 | 6.71E-01 | 6.45E+02  | 2.12E+03 | 8.87E-01 | 6.62E-05 | 8.52E+05 | 8.52E+05 |
| aulohede  | F_As | 23731  | 6.31E-01 | 3.16E+01  | 2.07E+01 | 4.05E+00 | -2.33E+02 | 3.11E+02 | 9.71E+00 | 3.03E-01 | -6.71E+01 | 3.00E+02 | 2.64E+00 | 3.43E-04 | 2.16E+05 | 2.16E+05 |
| aurailima | O_St | 2888   | 1.12E-01 | 2.21E+01  | 6.48E+01 | 4.97E-01 | -1.67E+02 | 2.59E+02 | 9.40E+00 | 2.68E-01 | -6.25E+01 | 2.90E+02 | 2.05E+00 | 6.40E-04 | 3.91E+04 | 3.91E+04 |
| aureanop  | O_St | 16948  | 9.29E-02 | 1.35E+01  | 2.43E+01 | 9.54E-01 | 3.46E+01  | 4.40E+01 | 7.82E-01 | 7.86E-01 | -3.84E+01 | 2.38E+02 | 1.97E+01 | 6.69E-04 | 2.15E+05 | 2.15E+05 |
| austimlin | M_Fs | 144184 | 2.66E-01 | -2.49E+02 | 3.31E+02 | 3.00E+01 | 6.26E+00  | 1.35E+02 | 2.46E+00 | 2.05E-01 | -1.42E+02 | 1.11E+03 | 1.13E+00 | 2.89E-05 | 2.23E+06 | 2.23E+06 |
| babeequi  | O_AI | 8555   | 6.95E-01 | 1.90E+01  | 1.51E+01 | 8.80E+00 | -1.31E+01 | 7.00E+01 | 2.68E+00 | 2.43E-01 | 2.79E+01  | 3.03E+02 | 9.80E-01 | 1.58E-03 | 6.53E+04 | 6.54E+04 |
| babemicr  | O_AI | 1243   | 1.35E-01 | 2.29E+01  | 2.10E-01 | 7.51E-01 | -1.18E+02 | 1.90E+02 | 5.21E+00 | 6.85E-01 | -3.71E+01 | 3.65E+02 | 3.54E+00 | 1.27E-02 | 1.39E+04 | 1.40E+04 |
| bactcucu  | M_In | 57117  | 4.28E-01 | -3.53E+01 | 9.74E+01 | 1.41E+01 | 3.39E+01  | 1.01E+02 | 8.74E-01 | 3.04E-01 | -3.68E+02 | 2.41E+03 | 1.01E+00 | 5.24E-05 | 8.00E+05 | 8.00E+05 |
| bactdors  | M_In | 74386  | 5.00E-01 | 9.76E+00  | 5.26E+01 | 6.87E+00 | 2.56E+01  | 1.51E+02 | 8.72E-01 | 2.89E-01 | -5.54E+02 | 2.93E+03 | 1.07E+00 | 7.29E-05 | 1.01E+06 | 1.01E+06 |
| bactolea  | M_In | 54824  | 4.83E-01 | 2.32E+01  | 3.98E+01 | 4.64E+00 | 1.06E+01  | 1.74E+02 | 9.95E-01 | 2.54E-01 | -2.69E+02 | 1.97E+03 | 1.06E+00 | 6.88E-05 | 7.61E+05 | 7.61E+05 |
| balaacut  | M_Mm | 182835 | 2.26E-02 | 4.45E+01  | 4.04E+01 | 5.23E+00 | 5.94E+01  | 8.58E+01 | 8.57E-01 | 1.61E-01 | -1.32E+02 | 1.35E+03 | 9.75E-01 | 1.59E-05 | 3.33E+06 | 3.33E+06 |
| betavulg  | P_Eu | 112547 | 2.68E-01 | 3.50E+01  | 5.62E+01 | 3.79E+00 | -6.75E+01 | 1.93E+02 | 2.67E+00 | 2.11E-01 | -2.06E+02 | 9.28E+02 | 1.60E+00 | 4.74E-05 | 1.67E+06 | 1.67E+06 |
| bigenata  | O_Rh | 167579 | 4.11E-02 | 1.34E+01  | 3.30E+01 | 9.67E-01 | -1.93E+02 | 2.57E+02 | 2.23E+01 | 2.04E-01 | -1.30E+02 | 2.84E+02 | 4.32E+00 | 1.54E-04 | 1.98E+06 | 1.98E+06 |
| bisobiso  | M_Mm | 173347 | 2.15E-02 | 4.45E+01  | 4.08E+01 | 5.25E+00 | 5.34E+01  | 8.10E+01 | 1.04E+00 | 1.38E-01 | -1.30E+02 | 1.36E+03 | 9.66E-01 | 1.62E-05 | 3.18E+06 | 3.18E+06 |
| blassepec | O_St | 21954  | 7.23E-01 | 7.00E+00  | 2.28E+01 | 2.97E+01 | -1.91E+01 | 4.83E+01 | 1.26E+01 | 2.21E-01 | -5.53E+02 | 6.12E+02 | 2.24E+01 | 3.53E-03 | 1.01E+05 | 1.01E+05 |
| boleedul  | F_Ba | 74199  | 8.57E-01 | 1.52E+01  | 3.67E+01 | 7.90E+00 | -8.74E+01 | 1.48E+02 | 4.62E+00 | 1.30E-01 | 7.35E+01  | 2.59E+02 | 8.22E-01 | 9.73E-04 | 5.57E+05 | 5.57E+05 |
| bolbtterr | M_In | 65280  | 4.55E-01 | -9.19E+01 | 1.68E+02 | 1.40E+01 | -1.44E+01 | 2.80E+02 | 1.20E+00 | 4.60E-01 | 6.35E+02  | 2.03E+03 | 7.34E-01 | 2.71E-05 | 8.95E+05 | 8.95E+05 |
| bos_mutu  | M_Mm | 173155 | 9.56E-02 | 5.69E+01  | 3.86E+01 | 1.67E+00 | -2.98E+02 | 5.75E+02 | 3.30E+00 | 1.51E-01 | -3.23E+02 | 1.78E+03 | 1.17E+00 | 1.74E-05 | 3.12E+06 | 3.12E+06 |
| bos_taur  | M_Mm | 200675 | 1.94E-02 | 4.55E+01  | 4.04E+01 | 5.83E+00 | 5.90E+01  | 8.02E+01 | 1.60E-01 | 1.58E-01 | -1.27E+02 | 1.35E+03 | 9.48E-01 | 1.44E-05 | 3.68E+06 | 3.68E+06 |
| botricne  | F_As | 26333  | 5.29E-02 | -5.77E+01 | 1.00E+02 | 1.03E+01 | 4.08E+01  | 1.38E+01 | 8.64E+00 | 5.64E-01 | -2.41E+02 | 4.05E+02 | 4.41E+00 | 4.26E-04 | 2.82E+05 | 2.83E+05 |
| bracdist  | P_Mo | 128580 | 4.57E-01 | 3.06E+01  | 5.90E+01 | 3.66E+00 | -6.57E+01 | 2.27E+02 | 1.77E+00 | 2.51E-01 | -4.56E+02 | 9.98E+02 | 2.80E+00 | 5.50E-05 | 1.68E+06 | 1.68E+06 |
| bracstac  | P_Mo | 120667 | 4.50E-01 | 3.17E+01  | 5.82E+01 | 3.61E+00 | -7.11E+01 | 2.22E+02 | 1.87E+00 | 2.53E-01 | -4.56E+02 | 1.00E+03 | 2.82E+00 | 5.58E-05 | 1.58E+06 | 1.58E+06 |
| brasnapu  | P_Eu | 389377 | 6.31E-01 | -1.68E+01 | 9.89E+01 | 8.30E+00 | -9.24E+00 | 2.73E+02 | 2.37E+00 | 3.57E-01 | 6.60E+02  | 2.05E+03 | 1.29E+00 | 6.95E-05 | 4.30E+06 | 4.30E+06 |
| brasoler  | P_Eu | 200096 | 6.33E-01 | -3.06E+01 | 1.13E+02 | 9.28E+00 | -1.26E+02 | 3.14E+02 | 2.66E+00 | 3.55E-01 | 7.17E+02  | 2.06E+03 | 1.35E+00 | 1.11E-04 | 2.22E+06 | 2.22E+06 |
| brugpaha  | M_Ne | 61492  | 8.93E-03 | -2.95E+02 | 3.25E+02 | 2.94E+01 | -7.69E+01 | 1.72E+02 | 6.02E+00 | 2.24E-01 | -1.50E+02 | 3.74E+02 | 3.29E+00 | 1.06E-04 | 7.91E+05 | 7.92E+05 |
| brughtimo | M_Ne | 60134  | 1.12E-02 | -3.71E+02 | 4.06E+02 | 3.00E+01 | -3.91E+01 | 1.41E+02 | 3.96E+00 | 3.31E-01 | -1.31E+02 | 3.71E+02 | 3.47E+00 | 1.13E-04 | 7.66E+05 | 7.66E+05 |
| bubabuba  | M_Mm | 198444 | 8.23E-02 | 5.26E+01  | 3.95E+01 | 2.16E+00 | -3.94E+01 | 3.55E+02 | 1.38E+00 | 2.56E-01 | -1.58E+02 | 1.85E+03 | 1.05E+00 | 1.46E-05 | 3.61E+06 | 3.61E+06 |
| bursxylo  | M_Ne | 70281  | 3.53E-01 | 1.83E+01  | 1.84E+01 | 4.70E+00 | 5.48E+01  | 1.87E+01 | 9.14E-01 | 3.66E-01 | -2.30E+02 | 5.64E+02 | 2.44E+00 | 1.50E-04 | 8.23E+05 | 8.23E+05 |
| bysscirc  | F_As | 30227  | 6.29E-01 | 3.28E+01  | 1.80E+01 | 3.79E+00 | -3.04E+01 | 1.06E+02 | 2.77E+00 | 3.56E-01 | 9.61E+01  | 3.02E+02 | 1.17E+00 | 3.02E-04 | 2.72E+05 | 2.72E+05 |
| caenbren  | M_Ne | 127822 | 5.36E-01 | -7.05E+00 | 5.31E+01 | 1.69E+01 | -7.03E+00 | 1.34E+02 | 1.32E+00 | 3.68E-01 | 2.01E+02  | 3.61E+02 | 1.47E+00 | 2.03E-04 | 1.36E+06 | 1.36E+06 |
| caenbrig  | M_Ne | 183393 | 3.70E-01 | 1.63E+01  | 2        |          |           |          |          |          |           |          |          |          |          |          |

|           |      |        |          |           |          |          |           |          |          |          |           |          |          |          |          |          |
|-----------|------|--------|----------|-----------|----------|----------|-----------|----------|----------|----------|-----------|----------|----------|----------|----------|----------|
| condcris  | M_Mm | 169482 | 7.98E-02 | 4.58E+01  | 4.22E+01 | 2.58E+00 | -3.43E+01 | 3.63E+02 | 1.30E+00 | 3.25E-01 | -1.57E+02 | 1.85E+03 | 1.14E+00 | 1.75E-05 | 3.02E+06 | 3.02E+06 |
| conithro  | F_En | 27154  | 8.92E-01 | 2.61E+01  | 2.36E+01 | 4.20E+00 | -5.49E+01 | 1.16E+02 | 3.79E+00 | 1.02E-01 | 5.89E+01  | 4.08E+02 | 1.50E+00 | 3.15E-04 | 2.06E+05 | 2.06E+05 |
| cordmili  | F_As | 18852  | 5.87E-01 | 2.79E+01  | 2.78E+01 | 3.41E+00 | -1.77E+02 | 2.38E+02 | 8.09E+00 | 3.03E-01 | -9.00E+01 | 3.78E+02 | 2.98E+00 | 4.80E-04 | 1.87E+05 | 1.87E+05 |
| crigris   | M_Mm | 171869 | 1.05E-01 | 5.60E+01  | 3.67E+01 | 1.76E+00 | -4.54E+02 | 7.05E+02 | 5.10E+00 | 1.44E-01 | -1.99E+02 | 1.67E+03 | 1.21E+00 | 1.36E-05 | 3.07E+06 | 3.07E+06 |
| cucucano  | M_Av | 136426 | 9.72E-02 | 5.86E+01  | 3.68E+01 | 1.39E+00 | 5.82E+00  | 1.73E+02 | 1.00E+00 | 2.89E-02 | -9.89E+01 | 9.10E+02 | 1.17E+00 | 2.35E-05 | 2.34E+06 | 2.34E+06 |
| cucumelo  | P_Eu | 110558 | 3.79E-01 | 1.80E+01  | 7.34E+01 | 4.43E+00 | -2.12E+01 | 3.33E+02 | 1.24E+00 | 5.33E-01 | -4.00E+02 | 1.08E+03 | 4.43E+00 | 6.67E-01 | 1.53E+06 | 1.53E+06 |
| cucusati  | P_Eu | 93576  | 3.67E-01 | 3.61E+01  | 5.47E+01 | 3.46E+00 | -7.18E+01 | 3.00E+02 | 1.56E+00 | 4.78E-01 | -5.15E+02 | 1.15E+03 | 3.98E+00 | 6.11E-05 | 1.26E+06 | 1.26E+06 |
| culsequin | M_In | 100107 | 3.99E-01 | -8.44E+01 | 1.44E+02 | 2.95E+01 | -1.15E+01 | 1.43E+02 | 1.07E+00 | 3.55E-01 | -1.77E+02 | 2.31E+03 | 1.27E+00 | 6.15E-05 | 1.38E+06 | 1.38E+06 |
| cybejadi  | F_As | 2090   | 2.47E-01 | 1.67E+01  | 1.73E+01 | 7.46E-01 | -1.84E+02 | 2.44E+02 | 2.90E+01 | 4.86E-01 | -1.31E+02 | 2.67E+02 | 2.81E+00 | 1.61E-03 | 2.26E+04 | 2.27E+04 |
| cyloglid  | M_Ne | 41333  | 5.45E-01 | 1.74E+01  | 3.37E+01 | 7.00E+00 | -2.69E+02 | 3.37E+02 | 1.03E+01 | 2.53E-01 | -1.08E+02 | 3.48E+02 | 2.52E+00 | 4.11E-04 | 4.17E+05 | 4.17E+05 |
| cynosemi  | M_Fs | 209341 | 2.90E-01 | 2.13E+00  | 8.54E+01 | 6.83E+00 | 3.54E+01  | 1.64E+02 | 1.13E+00 | 3.16E-01 | -1.14E+02 | 7.10E+02 | 1.24E+00 | 2.75E-05 | 3.04E+06 | 3.05E+06 |
| cyprvari  | M_Fs | 221553 | 2.69E-01 | -1.16E+02 | 1.98E+02 | 1.88E+01 | -2.25E+01 | 1.75E+02 | 2.57E+00 | 1.95E-01 | -3.90E+02 | 1.69E+03 | 1.38E+00 | 2.47E-05 | 3.50E+06 | 3.50E+06 |
| cytafeli  | O_AI | 16723  | 5.71E-01 | -4.42E+00 | 4.22E+01 | 1.17E+01 | -2.78E+01 | 9.70E+01 | 2.19E+00 | 2.84E-01 | -2.11E+03 | 2.46E+03 | 3.00E+01 | 6.85E-04 | 1.62E+05 | 1.62E+05 |
| danireri  | M_Fs | 246579 | 1.76E-01 | -1.15E+02 | 2.00E+02 | 1.90E+01 | -2.72E+01 | 1.72E+02 | 2.89E+00 | 1.47E-01 | -3.76E+02 | 1.70E+03 | 1.31E+00 | 2.52E-05 | 4.16E+06 | 4.16E+06 |
| dauccaro  | P_Eu | 126736 | 3.90E-01 | 2.04E+01  | 6.81E+01 | 4.57E+00 | -7.53E+01 | 2.91E+02 | 2.03E+00 | 3.65E-01 | -4.63E+02 | 1.19E+03 | 2.97E+00 | 5.84E-05 | 1.71E+06 | 1.71E+06 |
| dendpndo  | M_In | 101883 | 4.96E-01 | -7.83E+01 | 1.33E+02 | 3.00E+01 | -6.30E+00 | 1.83E+02 | 9.61E-01 | 4.31E-01 | 6.23E+02  | 1.53E+03 | 1.55E+00 | 1.42E-04 | 1.24E+06 | 1.24E+06 |
| dichsqua  | F_Ba | 71800  | 8.43E-01 | 2.18E+01  | 3.40E+01 | 5.57E+00 | -1.81E+01 | 1.11E+02 | 1.69E+00 | 1.55E-01 | 3.14E+02  | 2.29E+03 | 6.19E-01 | 2.34E-04 | 5.98E+05 | 5.99E+05 |
| dictdisc  | O_Am | 15508  | 6.93E-01 | 2.55E+01  | 6.75E+01 | 3.31E+00 | -1.89E+01 | 1.25E+02 | 1.49E+00 | 3.07E-01 | 6.12E+02  | 1.99E+03 | 1.99E+01 | 3.36E-04 | 1.69E+05 | 1.69E+05 |
| dioscryo  | F_Ba | 58221  | 4.98E-01 | -2.21E+00 | 4.26E+01 | 2.57E+00 | 1.51E+01  | 3.08E+01 | 9.42E+00 | 4.90E-01 | 1.73E+02  | 2.60E+02 | 4.00E-01 | 1.65E-03 | 4.85E+05 | 4.85E+05 |
| dioscryo  | M_PI | 31594  | 1.59E-01 | -5.04E+01 | 8.54E+01 | 2.12E+01 | -2.47E+01 | 1.49E+02 | 1.68E+00 | 3.53E-01 | -2.42E+03 | 3.66E+03 | 4.48E+00 | 1.64E-04 | 4.81E+05 | 4.81E+05 |
| dipoordi  | M_Mm | 175843 | 1.12E-01 | 5.56E+01  | 3.93E+01 | 1.69E+00 | -4.52E+02 | 7.06E+02 | 4.88E+00 | 1.36E-01 | -1.99E+02 | 1.67E+03 | 1.19E+00 | 1.80E-05 | 3.15E+06 | 3.15E+06 |
| diurnoxi  | M_In | 57271  | 5.44E-01 | 4.01E+01  | 2.90E+01 | 2.18E+00 | -4.91E+01 | 5.60E+02 | 1.07E+00 | 3.95E-01 | -7.03E+01 | 2.39E+03 | 1.09E+00 | 5.90E-05 | 7.92E+05 | 7.92E+05 |
| dtohssept | F_As | 18703  | 6.30E-01 | 2.23E+01  | 3.03E+01 | 6.52E+00 | -9.24E+01 | 1.72E+02 | 3.85E+00 | 3.45E-01 | -2.63E+02 | 6.27E+02 | 2.04E+00 | 3.29E-04 | 1.70E+05 | 1.70E+05 |
| drosanan  | M_In | 99207  | 5.55E-01 | -9.34E+01 | 1.51E+02 | 3.00E+01 | 4.19E+00  | 1.98E+02 | 9.42E-01 | 3.33E-01 | 1.50E+02  | 1.99E+03 | 1.06E+00 | 1.02E-04 | 1.20E+06 | 1.20E+06 |
| droserec  | M_In | 94215  | 5.22E-01 | -1.55E+01 | 7.43E+01 | 1.30E+01 | 7.28E+00  | 2.06E+02 | 9.47E-01 | 3.98E-01 | -1.30E+03 | 4.00E+03 | 1.76E+00 | 1.18E-04 | 1.17E+06 | 1.17E+06 |
| drosgrim  | M_In | 85931  | 5.52E-01 | 1.94E+01  | 4.31E+01 | 5.75E+00 | -1.89E+01 | 3.09E+02 | 9.63E-01 | 4.27E-01 | 6.17E+02  | 2.17E+03 | 1.38E+00 | 1.24E-04 | 1.07E+06 | 1.07E+06 |
| drosmela  | M_In | 117705 | 4.44E-01 | -1.13E+02 | 1.72E+02 | 3.00E+01 | 2.59E+01  | 1.59E+02 | 8.64E-01 | 3.73E-01 | -4.05E+02 | 2.23E+03 | 1.21E+00 | 7.76E-05 | 1.58E+06 | 1.58E+06 |
| drosmira  | M_In | 23664  | 6.86E-01 | -1.15E+01 | 7.28E+01 | 1.07E+01 | -1.23E+01 | 3.15E+02 | 9.85E-01 | 2.44E-01 | -2.86E+02 | 3.10E+03 | 1.38E+00 | 1.57E-04 | 2.68E+05 | 2.68E+05 |
| drosmoja  | M_In | 95526  | 5.53E-01 | 2.32E+01  | 3.79E+01 | 5.63E+00 | -2.97E+01 | 1.58E+02 | 1.86E+00 | 1.54E-01 | -1.18E+02 | 1.08E+03 | 1.04E+00 | 8.92E-05 | 1.21E+06 | 1.21E+06 |
| drosopers | M_In | 79700  | 6.17E-01 | -2.61E+01 | 8.72E+01 | 1.30E+01 | -8.55E+00 | 2.11E+02 | 8.93E-01 | 3.12E-01 | -1.21E+03 | 3.47E+03 | 1.82E+00 | 1.15E-04 | 9.29E+05 | 9.29E+05 |
| drospehu  | M_In | 98282  | 6.20E-01 | 4.39E+00  | 5.68E+01 | 8.04E+00 | -1.11E+01 | 3.22E+02 | 8.71E-01 | 3.22E-01 | 8.52E+02  | 2.06E+03 | 1.08E+00 | 1.04E-04 | 1.19E+06 | 1.19E+06 |
| drossech  | M_In | 87774  | 5.34E-01 | -2.28E+01 | 8.17E+01 | 1.48E+01 | -5.04E+00 | 2.07E+02 | 9.17E-01 | 4.28E-01 | 7.66E+02  | 2.11E+03 | 1.29E+00 | 1.41E-04 | 1.05E+06 | 1.05E+06 |
| drossimu  | M_In | 84614  | 5.39E-01 | -2.81E+01 | 8.70E+01 | 1.58E+01 | -6.85E+00 | 2.12E+02 | 9.70E-01 | 4.15E-01 | 6.57E+02  | 1.96E+03 | 1.26E+00 | 1.39E-04 | 1.01E+06 | 1.01E+06 |
| drosviri  | M_In | 98524  | 5.31E-01 | -8.96E+00 | 6.91E+01 | 1.14E+01 | -4.12E+01 | 1.40E+02 | 2.72E+00 | 1.16E-01 | -5.80E+01 | 7.59E+02 | 9.38E-01 | 8.14E-05 | 1.25E+06 | 1.25E+06 |
| droswill  | M_In | 90625  | 6.06E-01 | -1.05E+01 | 7.24E+01 | 1.11E+01 | -6.83E-01 | 2.17E+02 | 9.15E-01 | 2.93E-01 | -1.03E+03 | 3.45E+03 | 1.64E+00 | 1.25E-04 | 1.08E+06 | 1.08E+06 |
| drosyaku  | M_In | 97670  | 5.13E-01 | -1.06E+02 | 1.65E+02 | 2.92E+01 | 7.88E+00  | 1.82E+02 | 9.96E-01 | 3.75E-01 | -4.29E+01 | 2.09E+03 | 1.15E+00 | 8.83E-05 | 1.22E+06 | 1.22E+06 |
| echicana  | M_PI | 54468  | 1.40E-01 | 8.01E+00  | 2.68E+01 | 5.38E+00 | -1.24E+02 | 1.97E+02 | 2.88E+01 | 1.62E-01 | -1.02E+02 | 4.47E+02 | 1.31E+00 | 8.61E-05 | 7.84E+05 | 7.84E+05 |
| echicapr  | M_PI | 20223  | 1.45E-01 | 5.33E+00  | 3.37E+01 | 6.10E+00 | -8.86E+00 | 1.25E+02 | 1.92E+00 | 3.11E-01 | -2.16E+03 | 3.65E+03 | 3.27E+00 | 1.43E-04 | 3.24E+05 | 3.24E+05 |
| echigran  | M_PI | 57300  | 1.40E-01 | 1.20E+01  | 2.32E+01 | 4.46E+00 | -1.24E+02 | 1.97E+02 | 2.04E+01 | 1.76E-01 | -7.99E+01 | 4.20E+02 | 1.29E+00 | 8.67E-05 | 8.17E+05 | 8.18E+05 |
| echimult  | M_PI | 60158  | 1.44E-01 | 1.53E+01  | 1.98E+01 | 3.77E+00 | -1.32E+02 | 2.05E+02 | 3.00E+01 | 1.78E-01 | -7.25E+01 | 4.10E+02 | 1.29E+00 | 8.87E-05 | 8.55E+05 | 8.55E+05 |
| echitelf  | M_Mm | 155701 | 1.08E-01 | 6.07E+01  | 3.26E+01 | 1.57E+00 | -4.62E+01 | 3.46E+02 | 1.37E+00 | 2.24E-01 | -1.60E+02 | 1.86E+03 | 1.05E+00 | 1.80E-05 | 2.82E+06 | 2.82E+06 |
| eimemiti  | O_AI | 18315  | 1.06E-02 | -9.83E+00 | 6.33E+01 | 1.48E+01 | -1.09E+02 | 2.18E+02 | 1.32E+01 | 5.66E-02 | -7.80E+01 | 2.89E+02 | 2.24E+00 | 2.24E-04 | 2.44E+05 | 2.44E+05 |
| eimeprae  | O_AI | 18567  | 8.53E-03 | -9.63E+00 | 6.35E+01 | 1.50E+01 | -1.04E+02 | 2.24E+02 | 9.65E+00 | 1.17E-01 | -7.63E+01 | 2.89E+02 | 2.30E+00 | 2.07E-04 | 2.44E+05 | 2.44E+05 |
| elaielap  | M_Ne | 56057  | 1.23E-02 | -4.98E+01 | 8.20E+01 | 6.38E+00 | -1.09E+02 | 2.05E+02 | 1.39E+00 | 2.15E-01 | -1.05E+02 | 3.74E+02 | 3.19E+00 | 1.07E-04 | 7.29E+05 | 7.29E+05 |
| entamosh  | O_Am | 4161   | 7.06E-01 | -4.25E+01 | 8.76E+01 | 1.77E+01 | 5.90E+00  | 8.41E+01 | 1.99E+02 | 2.47E-01 | 1.09E+01  | 3.11E+02 | 3.00E+01 | 2.07E-03 | 3.67E+04 | 3.68E+04 |
| enteverm  | M_Ne | 63726  | 1.21E-01 | -1.17E+02 | 1.89E+02 | 1.83E+01 | -5.69E+01 | 1.73E+02 | 5.43E+00 | 2.46E-01 | -8.19E+01 | 2.56E+02 | 1.90E+00 | 1.06E-04 | 8.11E+05 | 8.11E+05 |
| eperalc   | O_Op | 42543  | 3.84E-02 | 3.16E+01  | 2.48E+01 | 5.43E+00 | -1.48E+01 | 1.45E+02 | 2.19E+00 | 7.58E-01 | -1.62E+02 | 3.32E+02 | 4.09E+00 | 1.43E-04 | 5.19E+05 | 5.19E+05 |
| epetfusc  | M_Mm | 164886 | 1.09E-01 | 5.68E+01  | 3.76E+01 | 1.57E+00 | -4.47E+02 | 7.10E+02 | 4.72E+00 | 1.57E-01 | -1.99E+02 | 1.67E+03 | 1.18E+00 | 1.87E-05 | 2.94E+06 | 2.94E+06 |
| equuasin  | M_Mm | 203595 | 9.80E-02 | 5.99E+01  | 3.75E+01 | 1.42E+00 | -2.94E+02 | 5.79E+02 | 3.69E+00 | 1.28E-01 | -3.08E+02 | 1.79E+03 | 1.15E+00 | 1.50E-05 | 3.70E+06 | 3.70E+06 |
| equucaba  | M_Mm | 193596 | 1.02E-01 | 5.91E+01  | 3.92E+01 | 1.44E+00 | -2.86E+02 | 5.85E+02 | 3.66E+00 | 1.44E-01 | -2.85E+02 | 1.79E+03 | 1.14E+00 | 1.60E-05 | 3.51E+06 | 3.51E+06 |
| equuprze  | M_Mm | 186220 | 9.16E-02 | 6.17E+01  | 3.57E+01 | 1.36E+00 | -2.97E+02 | 5.77E+02 | 3.51E+00 | 1.33E-01 | -3.28E+02 | 1.78E+03 | 1.18E+00 | 1.60E-05 | 3.37E+06 | 3.37E+06 |
| erineuro  | M_Mm | 168610 | 8.94E-02 | -2.49E+02 | 3.36E+02 | 2.52E+01 | 1.97E+01  | 1.56E+02 | 2.29E+00 | 9.08E-02 | -2.66E+02 | 1.63E+03 | 1.09E+00 | 1.83E-05 | 3.07E+06 | 3.07E+06 |
| esoxicli  | M_Fs | 239939 | 3.07E-01 | 5.15E+01  | 5.97E+01 | 1.68E+00 | 2.56E+01  | 2.03E+02 | 2.18E+00 | 1.67E-01 | -1.13E+02 | 9.66E+02 | 1.10E+00 | 1.73E-05 | 3.80E+06 | 3.80E+06 |
| exacgran  | P_Eu | 136452 | 2.74E-01 | -2.80E+02 | 3.72E+02 | 2.52E+01 | -5.28E+01 | 2.10E+02 | 1.74E+00 | 4.56E-01 | -5.71E+02 | 1.14E+03 | 3.70E+00 | 1.03E-04 | 1.85E+06 | 1.85E+06 |
| faschepa  | M_PI | 32508  | 2.47E-01 | 1.71E+01  | 1.96E+01 | 3.43E+00 | -7.12E+01 | 7.59E+02 | 8.32E-01 | 5.70E-01 | -1.93E+03 | 3.58E+03 | 3.41E+00 | 1.02E-04 | 5.33E+05 | 5.33E+05 |
| felicatu  | M_Mm | 191806 | 1.04E-01 | 6.11E+01  | 3.68E+01 | 1.41E+00 | -2.97E+02 | 5.76E+02 | 3.57E+00 | 1.29E-01 | -3.14E+02 | 1.79E+03 | 1.14E+00 | 1.61E-05 | 3.48E+06 | 3.48E+06 |
| ficealbi  | M_Av | 150343 | 9.23E-02 | 5.95E+01  | 3.43E+01 | 1.42E+00 | 5.52E+00  | 1.73E+02 | 9.89E-01 | 4.53E-02 | -9.77E+01 | 9.08E+02 | 1.12E+00 | 2.14E-05 | 2.59E+06 | 2.59E+06 |
| fukodama  | M_Mm | 206795 | 8.80E-02 | 5.22E+01  | 3.69E+01 | 2.05E+00 | -4.03E+01 | 3.54E+02 | 1.37E+00 | 2.46E-01 | -1.58E+02 | 1.85E+03 | 1.06E+00 | 1.43E-05 | 3.75E+06 | 3.75E+06 |
| fundhete  | M_Fs | 207482 | 2.51E-01 | -1.15E+02 | 2.00E+02 | 1.71E+01 | -2.35E+01 | 1.76E+02 | 2.45E+00 | 1.99E-01 |           |          |          |          |          |          |

|          |      |        |          |           |          |          |           |          |          |          |           |          |          |          |          |          |
|----------|------|--------|----------|-----------|----------|----------|-----------|----------|----------|----------|-----------|----------|----------|----------|----------|----------|
| jatrcurc | P_Eu | 109157 | 3.15E-01 | -2.96E+02 | 3.84E+02 | 3.00E+01 | -1.31E+02 | 2.69E+02 | 5.32E+00 | 2.23E-01 | -3.17E+02 | 7.90E+02 | 2.38E+00 | 5.43E-05 | 1.47E+06 | 1.47E+06 |
| kalalaxi | P_Eu | 136979 | 4.66E-01 | 2.11E+01  | 6.64E+01 | 4.65E+00 | -6.79E+01 | 2.65E+02 | 1.83E+00 | 4.64E-01 | -3.44E+02 | 8.89E+02 | 4.17E+00 | 6.10E-05 | 1.69E+06 | 1.69E+06 |
| kalamarn | P_Eu | 234492 | 4.85E-01 | 2.67E+01  | 6.08E+01 | 4.25E+00 | -8.44E+01 | 2.77E+02 | 2.04E+00 | 4.45E-01 | -3.38E+02 | 8.94E+02 | 4.39E+00 | 6.66E-05 | 2.86E+06 | 2.86E+06 |
| laccamet | F_Ba | 147822 | 8.14E-01 | -2.27E+01 | 7.53E+01 | 1.50E+01 | -9.23E+00 | 8.71E+01 | 1.71E+00 | 1.83E-01 | 2.95E+02  | 2.16E+03 | 5.40E+00 | 1.18E-04 | 1.19E+06 | 1.19E+06 |
| larricoc | M_Fs | 212484 | 1.89E-01 | 1.05E+01  | 7.76E+01 | 7.42E+00 | 4.52E+01  | 9.27E+01 | 1.28E+00 | 3.58E-01 | -1.87E+02 | 9.49E+02 | 1.30E+00 | 2.66E-05 | 3.16E+06 | 3.16E+06 |
| lepesalm | M_Ar | 44584  | 4.56E-01 | -1.38E+02 | 1.98E+02 | 2.75E+01 | -1.76E+01 | 1.95E+02 | 1.08E+00 | 3.22E-01 | -3.16E+02 | 2.40E+03 | 1.05E+00 | 6.86E-05 | 6.15E+05 | 6.15E+05 |
| leptdece | M_In | 2493   | 1.26E-01 | -8.03E+00 | 6.25E+01 | 1.60E+01 | 1.55E+01  | 1.21E+02 | 1.05E+00 | 2.43E-01 | -6.16E+02 | 3.11E+03 | 1.22E+00 | 6.43E-04 | 4.45E+04 | 4.46E+04 |
| leptmacu | F_As | 22371  | 4.78E-02 | 3.83E+01  | 4.19E+00 | 1.21E+00 | 4.02E+01  | 1.35E+01 | 1.62E+00 | 6.85E-01 | -1.27E+02 | 2.61E+02 | 3.98E+00 | 6.13E-04 | 2.20E+05 | 2.20E+05 |
| leptwedd | M_Mm | 159567 | 7.96E-02 | 5.19E+01  | 3.89E+01 | 2.50E+00 | -3.81E+01 | 3.58E+02 | 1.29E+00 | 3.18E-01 | -1.57E+02 | 1.85E+03 | 1.07E+00 | 1.76E-05 | 2.86E+06 | 2.86E+06 |
| leucgong | F_Ba | 24591  | 8.22E-01 | -2.11E+01 | 7.27E+01 | 1.72E+01 | 2.17E+01  | 4.03E+01 | 1.49E+00 | 1.55E-01 | 2.90E+01  | 3.04E+02 | 2.60E+00 | 4.82E-04 | 1.84E+05 | 1.85E+05 |
| linehumi | M_In | 82775  | 2.75E-01 | -1.70E+02 | 2.47E+02 | 2.14E+00 | -2.67E+00 | 2.01E+02 | 1.29E+00 | 5.89E-01 | -3.36E+02 | 2.87E+02 | 3.41E+00 | 5.53E-05 | 1.20E+06 | 1.20E+06 |
| lipovexi | M_Mm | 165883 | 1.03E-01 | 6.14E+01  | 3.43E+01 | 1.42E+00 | -2.97E+02 | 5.76E+02 | 3.43E+00 | 1.34E-01 | -3.28E+02 | 1.78E+03 | 1.15E+00 | 1.74E-05 | 3.00E+06 | 3.00E+06 |
| loa_loa  | M_Ne | 164141 | 2.62E-02 | 9.81E+00  | 6.32E+01 | 9.38E-01 | -1.89E+02 | 2.85E+02 | 1.08E+01 | 2.14E-01 | -1.00E+02 | 3.39E+02 | 2.95E+00 | 7.88E-05 | 2.14E+06 | 2.14E+06 |
| lucicupr | M_In | 53515  | 3.84E-01 | -1.23E+02 | 1.85E+02 | 3.00E+01 | -1.11E+01 | 1.46E+02 | 1.19E+00 | 2.95E-01 | -3.53E+02 | 2.43E+03 | 1.19E+00 | 5.97E-05 | 7.74E+05 | 7.74E+05 |
| lutzloug | M_In | 1842   | 4.89E-01 | 3.66E+01  | 3.10E+01 | 3.70E+00 | -1.32E+01 | 2.13E+02 | 1.15E+00 | 3.15E-01 | -2.26E+03 | 3.69E+03 | 3.39E+00 | 8.10E-04 | 2.42E+04 | 2.43E+04 |
| malaglob | F_Ba | 2010   | 8.90E-01 | -1.10E+01 | 5.25E+01 | 3.58E+00 | 1.57E+00  | 1.43E+02 | 3.48E+00 | 7.35E-02 | -5.27E+01 | 3.10E+02 | 1.03E+01 | 1.55E-03 | 1.94E+04 | 1.95E+04 |
| maludome | P_Eu | 109326 | 7.50E-02 | 2.13E+01  | 3.49E+01 | 1.00E+00 | 3.58E+01  | 6.04E+01 | 2.94E+00 | 3.50E-01 | -1.10E+02 | 3.94E+02 | 1.77E+00 | 5.89E-05 | 1.47E+06 | 1.47E+06 |
| maniescu | P_Eu | 133923 | 4.20E-01 | 3.67E+01  | 5.41E+01 | 3.30E+00 | -8.00E+01 | 3.18E+02 | 1.65E+00 | 4.06E-01 | -4.86E+02 | 1.15E+03 | 2.86E+00 | 5.23E-05 | 1.79E+06 | 1.79E+06 |
| narmmarn | M_Mm | 179059 | 1.03E-01 | 5.48E+01  | 3.85E+01 | 1.74E+00 | -4.52E+02 | 7.06E+02 | 5.04E+00 | 1.54E-01 | -2.01E+02 | 1.67E+03 | 1.17E+00 | 1.75E-05 | 3.20E+06 | 3.20E+06 |
| linehumi | F_As | 24650  | 4.35E-01 | 3.34E+01  | 1.77E+01 | 3.57E+00 | -3.02E+02 | 3.77E+02 | 1.17E+01 | 4.19E-01 | -2.25E+02 | 4.55E+02 | 3.41E+00 | 3.77E-04 | 5.52E+05 | 5.52E+05 |
| martpter | F_Mu | 5694   | 2.28E-01 | -1.31E+01 | 7.52E+01 | 1.67E+00 | -7.44E+01 | 1.89E+02 | 8.67E+00 | 3.47E-01 | -2.34E+02 | 5.15E+02 | 2.71E+00 | 7.09E-04 | 7.33E+04 | 7.34E+04 |
| maytzebr | M_Fs | 246898 | 1.77E-01 | -4.40E+01 | 1.32E+02 | 1.17E+01 | 4.84E+01  | 1.07E+02 | 1.12E+00 | 3.65E-01 | -1.54E+02 | 1.09E+03 | 1.19E+00 | 2.02E-05 | 3.83E+06 | 3.83E+06 |
| mediturn | P_Eu | 157294 | 2.41E-01 | -2.81E+02 | 3.71E+02 | 3.00E+01 | -4.51E+01 | 1.87E+02 | 1.90E+00 | 4.43E-01 | -5.69E+02 | 1.14E+03 | 3.25E+00 | 6.87E-05 | 2.14E+06 | 2.14E+06 |
| megascal | M_In | 15263  | 2.72E-01 | -7.51E+01 | 1.30E+02 | 2.61E+01 | -5.03E+00 | 1.13E+02 | 1.05E+00 | 5.20E-01 | -8.43E+02 | 2.90E+03 | 3.48E+00 | 3.10E-04 | 2.11E+05 | 2.11E+05 |
| melicinc | M_In | 86014  | 6.78E-02 | 1.39E+01  | 6.48E+01 | 7.82E+00 | -8.81E+01 | 4.26E+02 | 1.15E+00 | 7.64E-01 | -2.98E+03 | 4.36E+03 | 4.85E+00 | 4.93E-05 | 1.39E+06 | 1.39E+06 |
| melivari | F_As | 46561  | 6.95E-01 | 2.95E+01  | 2.10E+01 | 4.44E+00 | -5.00E+01 | 1.28E+02 | 3.32E+00 | 2.94E-01 | 1.49E+02  | 2.79E+02 | 1.24E+00 | 2.68E-04 | 4.01E+05 | 4.01E+05 |
| meloflor | M_Ne | 165888 | 3.41E-01 | -2.18E+01 | 7.84E+01 | 2.20E+00 | -7.33E+01 | 1.17E+02 | 3.00E+01 | 2.89E-01 | -9.54E+01 | 3.26E+02 | 2.87E+00 | 1.86E-04 | 1.92E+06 | 1.92E+06 |
| melohapl | M_Ne | 72587  | 5.14E-01 | -7.86E+01 | 1.22E+02 | 3.00E+01 | -6.01E+01 | 1.45E+02 | 3.22E+00 | 2.23E-01 | -1.14E+02 | 3.59E+02 | 2.88E+00 | 3.57E-04 | 7.59E+05 | 7.59E+05 |
| meloincp | M_Ne | 103631 | 4.88E-01 | 3.39E+01  | 1.01E+01 | 2.68E+00 | 3.42E+00  | 1.55E+02 | 1.48E+00 | 3.03E-01 | 1.43E+00  | 3.35E+02 | 3.10E+00 | 3.48E-04 | 1.16E+06 | 1.16E+06 |
| mesoaura | M_Mm | 173296 | 9.20E-02 | 5.31E+01  | 3.60E+01 | 2.19E+00 | -3.79E+01 | 3.57E+02 | 1.38E+00 | 2.61E-01 | -1.57E+02 | 1.85E+03 | 1.11E+00 | 1.71E-05 | 3.12E+06 | 3.12E+06 |
| mesocort | M_Pi | 27969  | 1.31E-01 | -7.40E+01 | 1.08E+02 | 3.00E+01 | -3.44E+01 | 1.07E+02 | 1.40E+01 | 1.56E-01 | -2.09E+02 | 5.53E+02 | 1.89E+00 | 1.30E-04 | 6.93E+05 | 6.93E+05 |
| metaocci | M_Ar | 54205  | 6.80E-01 | 1.91E+01  | 8.68E+01 | 3.35E+00 | -2.95E+01 | 2.94E+02 | 1.20E+00 | 2.25E-01 | -1.40E+02 | 1.13E+03 | 1.22E+00 | 1.11E-04 | 3.88E+05 | 3.88E+05 |
| microchr | M_Mm | 183962 | 1.10E-01 | 5.54E+01  | 3.68E+01 | 1.77E+00 | -4.53E+02 | 7.05E+02 | 5.32E+00 | 1.32E-01 | -1.99E+02 | 1.67E+03 | 1.17E+00 | 1.74E-05 | 3.30E+06 | 3.30E+06 |
| micrpusi | P_Ch | 9489   | 5.31E-01 | -3.86E+01 | 1.39E+02 | 2.12E+00 | -5.79E+02 | 7.35E+02 | 2.16E+01 | 3.63E-01 | -3.34E+01 | 2.20E+02 | 3.00E+01 | 1.27E-03 | 1.10E+05 | 1.10E+05 |
| micropes | F_Ba | 3615   | 6.23E-01 | -1.92E+02 | 2.98E+02 | 5.74E+00 | 2.29E+01  | 1.61E+02 | 1.26E+01 | 2.65E-01 | 1.21E+02  | 1.34E+02 | 6.83E-01 | 2.92E-03 | 4.26E+04 | 4.27E+04 |
| mnemleid | M_Ct | 74248  | 6.63E-01 | 2.83E+01  | 1.46E+02 | 2.07E+00 | -5.29E+02 | 1.11E+03 | 2.63E+00 | 1.91E-01 | -1.21E+03 | 2.90E+03 | 2.17E+00 | 4.93E-05 | 1.08E+06 | 1.08E+06 |
| monobrev | O_Op | 121016 | 7.39E-01 | -1.05E+02 | 2.04E+02 | 9.36E+00 | -5.65E+01 | 1.87E+02 | 1.81E+00 | 2.61E-01 | -3.26E+02 | 9.63E+02 | 2.89E+00 | 1.52E-04 | 1.31E+06 | 1.31E+06 |
| monophar | M_In | 73081  | 2.67E-01 | -5.62E+01 | 1.35E+02 | 1.06E+01 | -3.43E+01 | 2.10E+02 | 1.96E+00 | 3.24E-01 | -3.10E+01 | 7.45E+02 | 9.24E-01 | 5.95E-05 | 1.09E+06 | 1.09E+06 |
| motelon  | F_Mu | 39074  | 6.55E-01 | 4.55E+01  | 5.88E+01 | 3.75E+00 | -9.15E+01 | 2.57E+02 | 2.15E+00 | 3.33E-01 | -7.49E+01 | 1.02E+03 | 3.48E+00 | 1.43E-04 | 4.35E+05 | 4.35E+05 |
| morunota | P_Eu | 96193  | 3.61E-01 | 2.75E+01  | 6.98E+01 | 3.53E+00 | -1.14E+02 | 4.08E+02 | 1.82E+00 | 6.03E-01 | -1.88E+02 | 9.04E+02 | 4.27E+00 | 5.82E-05 | 1.31E+06 | 1.31E+06 |
| nusaacur | P_Mo | 10167  | 3.02E-01 | -1.90E+02 | 2.73E+02 | 2.39E+01 | -1.24E+01 | 1.46E+02 | 2.71E+00 | 2.14E-01 | -6.17E+02 | 1.38E+03 | 2.40E+00 | 1.83E-04 | 1.45E+05 | 1.45E+05 |
| nusadome | M_In | 77049  | 4.61E-01 | -3.32E+01 | 9.52E+01 | 1.54E+01 | -2.60E+01 | 1.74E+02 | 1.59E+00 | 1.96E-01 | -5.85E+02 | 3.38E+03 | 1.18E+00 | 6.12E-05 | 1.10E+06 | 1.10E+06 |
| mycofiji | F_As | 17741  | 3.02E-01 | -3.93E+01 | 6.92E+01 | 9.77E+00 | -8.17E+01 | 1.35E+02 | 2.85E+01 | 4.20E-01 | 3.62E+01  | 5.17E+01 | 1.15E+00 | 6.53E-04 | 1.71E+05 | 1.71E+05 |
| myotbran | M_Mm | 184417 | 9.83E-02 | 6.09E+01  | 3.68E+01 | 1.35E+00 | -2.97E+02 | 5.76E+02 | 3.51E+00 | 1.25E-01 | -3.19E+02 | 1.78E+03 | 1.17E+00 | 1.61E-05 | 3.34E+06 | 3.34E+06 |
| myotdavi | M_Mm | 164515 | 9.59E-02 | 5.97E+01  | 3.67E+01 | 1.44E+00 | -2.98E+02 | 5.75E+02 | 3.44E+00 | 1.33E-01 | -3.24E+02 | 1.78E+03 | 1.20E+00 | 1.78E-05 | 2.97E+06 | 2.97E+06 |
| myotluci | M_Mm | 189453 | 5.10E-02 | -2.50E+02 | 3.36E+02 | 3.00E+01 | 2.06E+01  | 1.56E+02 | 1.51E+00 | 1.40E-01 | -2.66E+02 | 1.63E+03 | 1.12E+00 | 1.69E-05 | 3.43E+06 | 3.43E+06 |
| naeggubr | O_He | 10906  | 4.13E-01 | -1.89E+01 | 6.29E+01 | 1.43E+01 | -5.25E+01 | 1.25E+02 | 3.22E+00 | 4.85E-01 | -8.37E+01 | 5.03E+02 | 1.43E+00 | 3.65E-04 | 1.15E+05 | 1.15E+05 |
| nanngadi | O_St | 16410  | 5.28E-02 | 3.91E+01  | 8.33E+00 | 9.41E-01 | -4.02E+02 | 4.99E+02 | 1.73E+01 | 3.77E-01 | -3.37E+01 | 2.14E+02 | 3.79E+00 | 3.34E-04 | 1.91E+05 | 1.91E+05 |
| necaamer | M_Ne | 205935 | 5.38E-01 | 4.26E+01  | 2.14E+01 | 1.38E+00 | -6.64E+02 | 9.94E+02 | 4.10E+00 | 2.88E-01 | -1.61E+03 | 3.06E+03 | 3.17E+00 | 9.37E-05 | 2.78E+06 | 2.78E+06 |
| nelunici | P_Eu | 137714 | 4.60E-01 | 4.62E+01  | 5.51E+01 | 2.00E+00 | -1.83E+02 | 8.86E+02 | 1.35E+00 | 4.36E-01 | -2.01E+04 | 2.73E+04 | 5.17E+00 | 2.66E-05 | 2.15E+06 | 2.15E+06 |
| neoldeco | M_In | 70165  | 1.31E-01 | -3.22E+01 | 1.16E+02 | 1.16E+01 | 4.41E+01  | 7.40E+01 | 1.02E+00 | 6.18E-01 | -1.59E+02 | 9.50E+02 | 1.14E+00 | 5.42E-05 | 9.91E+05 | 9.91E+05 |
| neolbric | M_Fs | 203845 | 1.72E-01 | -2.41E+02 | 3.29E+02 | 3.00E+01 | 4.68E+01  | 9.91E+01 | 1.20E+00 | 3.55E-01 | -2.03E+02 | 1.12E+03 | 1.24E+00 | 2.39E-05 | 3.14E+06 | 3.14E+06 |
| nicyolv  | P_Eu | 158131 | 2.97E-01 | 2.64E+01  | 6.32E+01 | 4.16E+00 | -6.01E+01 | 2.13E+02 | 2.32E+00 | 2.24E-01 | -2.07E+02 | 9.09E+02 | 1.71E+00 | 3.53E-05 | 2.30E+06 | 2.30E+06 |
| nicoteme | P_Eu | 150979 | 3.15E-01 | 3.03E+01  | 5.99E+01 | 3.74E+00 | -3.52E+01 | 2.11E+02 | 1.77E+00 | 2.54E-01 | -1.81E+02 | 8.99E+02 | 1.72E+00 | 3.36E-05 | 2.19E+06 | 2.19E+06 |
| nippbras | M_Ne | 88763  | 4.61E-01 | 4.45E+01  | 1.74E+01 | 1.43E+00 | -4.96E+01 | 1.82E+02 | 1.93E+00 | 2.19E-01 | -1.82E+02 | 8.51E+02 | 2.23E+00 | 1.17E-04 | 1.17E+06 | 1.17E+06 |
| nothfuz  | M_Fs | 198802 | 2.78E-01 | -1.93E+02 | 2.71E+02 | 3.00E+01 | 4.09E+01  | 9.30E+01 | 1.69E+00 | 2.44E-01 | -1.28E+02 | 1.16E+03 | 1.04E+00 | 2.36E-05 | 3.03E+06 | 3.03E+06 |
| notocori | M_Fs | 171348 | 2.98E-01 | 5.39E+01  | 4.87E+01 | 1.65E+00 | 6.77E+01  | 1.90E+01 | 2.84E+00 | 4.72E-02 | -9.33E+01 | 6.52E+02 | 1.92E+00 | 6.52E-05 | 2.61E+06 | 2.61E+06 |
| ochoprin | M_Mm | 167442 | 1.11E-01 | 5.20E+01  | 3.93E+01 | 2.20E+00 | -3.83E+01 | 3.58E+02 | 1.31E+00 | 2.96E-01 | -1.57E+02 | 1.85E+03 | 1.08E+00 | 1.77E-05 | 2.98E+06 | 2.98E+06 |
| octodegu | M_Mm | 167970 | 1        |           |          |          |           |          |          |          |           |          |          |          |          |          |

|           |      |        |          |           |          |          |           |          |          |          |           |          |          |          |          |          |
|-----------|------|--------|----------|-----------|----------|----------|-----------|----------|----------|----------|-----------|----------|----------|----------|----------|----------|
| phytkern  | O_St | 26104  | 1.25E-01 | 2.16E+01  | 2.38E+01 | 1.29E+00 | -1.08E+02 | 1.83E+02 | 1.71E+01 | 3.94E-01 | -2.02E+02 | 4.19E+02 | 3.15E+00 | 4.25E-04 | 3.13E+05 | 3.13E+05 |
| phytlate  | O_St | 22866  | 1.20E-01 | 2.25E+01  | 2.04E+01 | 1.30E+00 | -1.36E+02 | 2.04E+02 | 2.34E+01 | 4.51E-01 | -1.22E+02 | 3.17E+02 | 2.63E+00 | 2.91E-04 | 2.62E+05 | 2.62E+05 |
| phytramo  | O_St | 23888  | 2.28E-01 | 1.28E+01  | 2.71E+01 | 1.06E+00 | -1.44E+02 | 2.12E+02 | 2.56E+01 | 5.25E-01 | -1.21E+02 | 2.59E+02 | 3.11E+00 | 4.61E-04 | 2.50E+05 | 2.50E+05 |
| phytolaj  | O_St | 33003  | 2.94E-01 | 1.10E+01  | 2.86E+01 | 1.18E+00 | -1.42E+02 | 2.15E+02 | 2.49E+01 | 4.21E-01 | -1.26E+02 | 2.55E+02 | 3.35E+00 | 4.82E-04 | 3.55E+05 | 3.55E+05 |
| pilocroc  | F_Ba | 172390 | 8.05E-01 | 2.36E+00  | 5.26E+01 | 8.81E+00 | -1.65E+01 | 1.04E+02 | 1.84E+00 | 1.93E-01 | 2.51E+02  | 2.23E+03 | 6.57E+00 | 1.11E-04 | 1.45E+06 | 1.45E+06 |
| pirospec  | F_Ne | 28814  | 1.53E-01 | 1.11E+01  | 4.74E+01 | 1.13E+00 | 3.15E+01  | 7.87E+01 | 1.22E+00 | 7.58E-01 | -2.48E+01 | 3.68E+02 | 1.40E+00 | 1.84E-04 | 3.41E+05 | 3.41E+05 |
| plasmicr  | F_Ba | 118268 | 8.10E-01 | 2.93E+01  | 2.36E+01 | 3.91E+00 | -6.51E+00 | 8.91E+01 | 1.61E+00 | 1.87E-01 | 2.94E+02  | 2.17E+03 | 4.22E+00 | 2.18E-04 | 1.01E+06 | 1.01E+06 |
| piscycno  | O_Al | 17250  | 1.04E-01 | 1.10E+01  | 2.57E+01 | 1.54E+00 | -1.45E+02 | 3.03E+02 | 3.37E+00 | 5.26E-01 | -1.43E+02 | 3.02E+02 | 7.79E+00 | 4.87E-04 | 2.08E+05 | 2.08E+05 |
| pliccric  | F_Ba | 76565  | 9.17E-01 | -1.42E+01 | 6.89E+01 | 1.36E+01 | -2.60E+01 | 1.07E+02 | 2.14E+00 | 8.22E-02 | 4.15E+02  | 2.12E+03 | 1.35E+00 | 3.91E-04 | 5.57E+05 | 5.57E+05 |
| pneujiro  | F_As | 10940  | 1.77E-01 | 2.17E+01  | 2.03E+01 | 1.39E+00 | 2.96E+00  | 4.04E+01 | 1.31E+01 | 7.85E-01 | -1.34E+02 | 2.86E+02 | 2.50E+00 | 8.24E-04 | 7.75E+04 | 7.76E+04 |
| poecform  | M_Fs | 248914 | 2.47E-01 | -9.38E+01 | 1.77E+02 | 1.55E+01 | -3.06E+01 | 1.62E+02 | 3.38E+00 | 1.55E-01 | -1.39E+02 | 9.03E+02 | 1.27E+00 | 2.12E-05 | 3.82E+06 | 3.82E+06 |
| poecclati | M_Fs | 246606 | 2.74E-01 | -5.08E+01 | 1.35E+02 | 1.10E+01 | 4.40E+01  | 1.02E+02 | 2.36E+00 | 1.04E-01 | -1.28E+02 | 8.64E+02 | 1.16E+00 | 2.01E-05 | 3.83E+06 | 3.83E+06 |
| poecmexi  | M_Fs | 246300 | 2.75E-01 | -5.09E+01 | 1.35E+02 | 1.10E+01 | 4.41E+01  | 1.03E+02 | 2.35E+00 | 1.04E-01 | -1.31E+02 | 8.63E+02 | 1.17E+00 | 2.05E-05 | 3.86E+06 | 3.86E+06 |
| poecreti  | M_Fs | 235996 | 1.64E-01 | -2.97E+01 | 1.13E+02 | 1.11E+01 | 4.88E+01  | 6.38E+01 | 1.18E+00 | 2.74E-01 | -1.49E+02 | 1.01E+03 | 1.23E+00 | 1.99E-05 | 3.67E+06 | 3.67E+06 |
| pogobarb  | M_In | 69080  | 2.66E-01 | -1.69E+02 | 2.48E+02 | 2.03E+01 | 3.05E+00  | 2.01E+02 | 1.22E+00 | 6.15E-01 | -3.36E+02 | 2.87E+03 | 1.02E+00 | 5.81E-05 | 9.99E+05 | 1.00E+06 |
| policana  | M_In | 70834  | 4.62E-01 | -3.12E+02 | 3.92E+02 | 2.99E+01 | 1.19E+01  | 2.05E+02 | 1.07E+00 | 4.35E-01 | -1.40E+02 | 2.70E+03 | 9.49E-01 | 6.70E-05 | 9.60E+05 | 9.60E+05 |
| plodimi   | M_In | 73610  | 4.60E-01 | -3.12E+02 | 3.92E+02 | 3.00E+01 | 1.34E+01  | 2.02E+02 | 1.05E+00 | 4.39E-01 | -1.40E+02 | 2.70E+03 | 9.48E-01 | 7.27E-05 | 1.00E+06 | 1.00E+06 |
| popueuph  | P_Eu | 162615 | 4.12E-01 | 2.64E+01  | 6.73E+01 | 3.72E+00 | -1.15E+02 | 4.07E+02 | 1.80E+00 | 5.13E-01 | -1.88E+02 | 9.03E+02 | 3.85E+00 | 4.81E-05 | 2.18E+06 | 2.18E+06 |
| poputric  | P_Eu | 165571 | 3.48E-01 | 2.61E+01  | 6.63E+01 | 4.18E+00 | -1.49E+02 | 3.09E+02 | 2.80E+00 | 3.91E-01 | -2.05E+02 | 7.72E+02 | 2.66E+00 | 5.43E-05 | 2.19E+06 | 2.19E+06 |
| priaserr  | M_In | 1636   | 7.03E-01 | -4.84E+01 | 1.02E+02 | 3.00E+01 | 2.40E+01  | 7.69E+01 | 1.25E+00 | 2.79E-01 | 4.60E+02  | 1.93E+03 | 3.25E+00 | 1.17E-03 | 1.43E+04 | 1.44E+04 |
| propcoqu  | M_Mm | 167484 | 8.92E-02 | 5.28E+01  | 3.86E+01 | 2.10E+00 | -3.91E+01 | 3.57E+02 | 1.36E+00 | 2.73E-01 | -1.57E+02 | 1.85E+03 | 1.03E+00 | 1.67E-05 | 3.03E+06 | 3.03E+06 |
| protxeno  | M_PI | 30583  | 4.46E-02 | 1.00E+01  | 1.92E+01 | 8.01E+00 | -1.93E+02 | 2.58E+02 | 9.22E+00 | 3.96E-01 | -2.00E+02 | 6.14E+02 | 1.76E+00 | 2.14E-04 | 4.30E+05 | 4.30E+05 |
| prunpers  | P_Eu | 111949 | 4.12E-01 | 3.05E+01  | 6.52E+01 | 3.52E+00 | -1.38E+02 | 3.32E+02 | 4.44E+00 | 4.26E-01 | -2.06E+02 | 7.70E+02 | 2.91E+00 | 6.87E-05 | 1.45E+06 | 1.45E+06 |
| pseuelat  | F_As | 29219  | 5.78E-01 | -2.98E+01 | 8.24E+01 | 1.65E+01 | -5.82E+01 | 1.33E+02 | 1.21E+01 | 8.39E-02 | -2.85E+01 | 1.65E+02 | 2.15E+00 | 2.45E-04 | 2.87E+05 | 2.88E+05 |
| pseuhube  | F_Ba | 3466   | 3.94E-01 | -1.65E+02 | 2.52E+02 | 2.04E+01 | -1.21E+02 | 3.58E+02 | 2.80E+00 | 3.80E-01 | -9.43E+02 | 1.68E+03 | 4.28E+00 | 1.77E-04 | 4.58E+04 | 4.59E+04 |
| pteralac  | M_Mm | 179445 | 6.11E-02 | -2.45E+01 | 1.12E+02 | 9.26E+00 | 1.97E+01  | 2.08E+02 | 1.31E+00 | 1.81E-01 | -2.36E+02 | 1.53E+03 | 1.12E+00 | 4.60E-05 | 3.21E+06 | 3.21E+06 |
| ptervamp  | M_Mm | 175255 | 6.15E-02 | -2.41E+01 | 1.11E+02 | 9.27E+00 | 2.09E+01  | 2.08E+02 | 1.24E+00 | 1.96E-01 | -2.25E+02 | 1.54E+03 | 1.10E+00 | 1.65E-05 | 3.14E+06 | 3.14E+06 |
| pundnyr   | M_Fs | 232224 | 1.77E-01 | -4.40E+01 | 1.32E+02 | 1.17E+01 | 4.89E+01  | 1.08E+02 | 1.10E+00 | 3.69E-01 | -1.55E+02 | 1.09E+03 | 1.21E+00 | 2.13E-05 | 3.59E+06 | 3.59E+06 |
| pyncynn   | F_Ba | 50288  | 7.64E-01 | -3.96E+01 | 9.39E+01 | 2.03E+01 | 3.44E+01  | 3.38E+01 | 1.09E+00 | 2.36E-01 | 1.94E+02  | 2.07E+03 | 2.76E+01 | 5.84E-04 | 3.96E+05 | 3.96E+05 |
| pyretere  | F_As | 17409  | 7.75E-01 | 3.08E+01  | 1.98E+01 | 4.47E+00 | -3.21E+02 | 4.00E+02 | 1.24E+01 | 1.79E-01 | -2.23E+02 | 5.62E+02 | 2.23E+00 | 4.79E-04 | 1.44E+05 | 1.44E+05 |
| pyretrit  | F_As | 19864  | 6.13E-01 | 2.79E+01  | 2.25E+01 | 5.31E+00 | -8.17E+01 | 1.63E+02 | 4.08E+00 | 2.72E-01 | -1.29E+03 | 1.61E+03 | 1.12E+01 | 4.15E-04 | 1.88E+05 | 1.88E+05 |
| ramavari  | M_Ar | 31985  | 6.67E-01 | 2.84E+01  | 4.23E+01 | 3.24E+00 | -7.49E+01 | 2.59E+02 | 5.53E+00 | 3.23E-01 | 6.73E+02  | 2.06E+03 | 1.66E+00 | 2.16E-04 | 3.52E+05 | 3.52E+05 |
| ramibrev  | F_Mu | 3427   | 1.21E-01 | 1.35E+01  | 1.40E+01 | 9.09E-01 | -1.93E+01 | 1.29E+02 | 1.50E+00 | 8.25E-01 | 1.10E+02  | 2.84E+02 | 1.46E+00 | 1.60E-03 | 4.43E+04 | 4.43E+04 |
| rattnorv  | M_Mm | 207585 | 1.04E-01 | 5.50E+01  | 3.87E+01 | 1.75E+00 | -4.52E+02 | 7.06E+02 | 5.05E+00 | 1.33E-01 | -1.99E+02 | 1.67E+03 | 1.12E+00 | 1.59E-05 | 3.74E+06 | 3.74E+06 |
| rhabkr30  | M_Ne | 24126  | 5.85E-01 | -5.16E+01 | 9.34E+01 | 2.68E+01 | -5.80E+01 | 1.37E+02 | 3.75E+00 | 1.63E-01 | -5.16E+00 | 4.34E+02 | 1.50E+00 | 2.21E-04 | 2.53E+05 | 2.54E+05 |
| rhizeric  | F_As | 40703  | 6.51E-01 | 3.18E+01  | 1.87E+01 | 3.89E+00 | -2.64E+01 | 1.05E+02 | 2.51E+00 | 3.34E-01 | 9.59E+01  | 3.02E+02 | 1.74E+00 | 2.71E-04 | 3.65E+05 | 3.65E+05 |
| rhizirre  | F_Gl | 71257  | 7.08E-01 | -3.23E+01 | 1.05E+02 | 1.24E+01 | -1.88E+01 | 1.18E+02 | 1.60E+00 | 2.92E-01 | -2.10E+03 | 3.69E+03 | 7.08E+00 | 1.86E-04 | 6.85E+05 | 6.86E+05 |
| rhizdale  | F_Ba | 83111  | 8.62E-01 | -9.20E+00 | 6.07E+01 | 1.48E+01 | -5.01E+01 | 1.12E+02 | 3.17E+00 | 1.26E-01 | 5.60E+01  | 2.69E+02 | 6.30E-01 | 5.57E-04 | 6.06E+05 | 6.06E+05 |
| rhodprol  | M_In | 75200  | 2.31E-01 | -1.77E+02 | 2.58E+02 | 2.50E+01 | 5.93E+01  | 7.77E+01 | 2.30E+00 | 7.84E-02 | -3.50E+02 | 9.87E+02 | 1.68E+00 | 5.04E-05 | 1.15E+06 | 1.15E+06 |
| ricicomm  | P_Eu | 98524  | 3.59E-01 | 2.25E+01  | 6.92E+01 | 4.40E+00 | -1.51E+02 | 3.12E+02 | 2.92E+00 | 3.86E-01 | -2.04E+02 | 7.73E+02 | 2.58E+00 | 6.20E-05 | 1.30E+06 | 1.30E+06 |
| romaculi  | M_Ne | 133408 | 1.27E-01 | -9.42E+01 | 1.51E+02 | 3.00E+01 | -5.91E+01 | 2.74E+02 | 1.34E+00 | 4.53E-01 | -2.73E+03 | 4.22E+03 | 4.06E+00 | 3.82E-05 | 2.12E+06 | 2.12E+06 |
| rousaegy  | M_Mm | 208749 | 1.01E-01 | 5.40E+01  | 4.12E+01 | 1.78E+00 | 5.24E+01  | 3.63E+02 | 9.29E-01 | 2.22E-01 | -1.78E+02 | 1.53E+03 | 1.03E+00 | 1.42E-05 | 3.77E+06 | 3.77E+06 |
| salipurp  | P_Eu | 170284 | 3.75E-01 | 3.50E+01  | 5.71E+01 | 3.47E+00 | -7.82E+01 | 2.98E+02 | 1.66E+00 | 4.91E-01 | -5.19E+02 | 1.15E+03 | 4.51E+00 | 5.21E-05 | 2.26E+06 | 2.26E+06 |
| sarrharr  | M_Mm | 165881 | 8.03E-02 | 6.44E+01  | 3.89E+01 | 1.30E+00 | -3.00E+02 | 5.74E+02 | 3.86E+00 | 1.11E-01 | -3.01E+02 | 1.79E+03 | 1.12E+00 | 1.62E-05 | 3.05E+06 | 3.05E+06 |
| sarrpurp  | P_Eu | 170418 | 3.78E-01 | 3.44E+01  | 5.78E+01 | 3.48E+00 | -8.21E+01 | 3.02E+02 | 1.67E+00 | 4.83E-01 | -5.31E+02 | 1.13E+03 | 4.57E+00 | 5.15E-05 | 2.26E+06 | 2.26E+06 |
| schiaggr  | O_St | 2557   | 2.62E-01 | 1.89E+01  | 6.59E+01 | 6.64E-01 | -1.99E+02 | 2.78E+02 | 1.73E+01 | 2.33E-01 | -9.83E+01 | 2.54E+02 | 3.65E+00 | 8.85E-04 | 3.21E+04 | 3.22E+04 |
| schicura  | M_PI | 28390  | 1.90E-01 | 2.35E+01  | 1.14E+01 | 2.51E+00 | -3.50E+01 | 1.87E+02 | 1.42E+00 | 1.55E-01 | -2.97E+03 | 4.22E+03 | 5.33E+00 | 9.68E-05 | 4.44E+05 | 4.44E+05 |
| schimans  | M_PI | 74180  | 1.57E-01 | 1.20E+01  | 2.26E+01 | 5.79E+00 | -1.41E+02 | 2.42E+02 | 4.18E+00 | 5.50E-02 | -9.22E+02 | 2.42E+03 | 2.21E+00 | 5.99E-05 | 1.24E+06 | 1.24E+06 |
| schimarg  | M_PI | 23549  | 1.39E-01 | 2.46E+01  | 1.08E+01 | 2.08E+00 | -2.21E+01 | 1.51E+02 | 1.22E+00 | 1.91E-01 | -1.94E+03 | 3.18E+03 | 3.69E+00 | 1.19E-04 | 3.79E+05 | 3.79E+05 |
| schimatt  | M_PI | 27944  | 1.42E-01 | -6.65E+01 | 1.03E+02 | 1.83E+01 | -1.13E+01 | 1.32E+02 | 1.33E+00 | 1.64E-01 | -2.98E+03 | 4.22E+03 | 5.34E+00 | 1.50E-04 | 4.45E+05 | 4.45E+05 |
| schirodh  | M_PI | 29679  | 1.98E-01 | 1.21E+01  | 2.26E+01 | 5.44E+00 | -7.46E+00 | 1.12E+02 | 1.36E+00 | 1.59E-01 | -2.97E+03 | 4.22E+03 | 5.24E+00 | 1.14E-04 | 4.58E+05 | 4.58E+05 |
| schisoli  | M_PI | 21242  | 8.72E-02 | 1.74E+01  | 1.69E+01 | 3.42E+00 | -1.20E+01 | 1.37E+02 | 1.13E+00 | 4.10E-01 | -2.76E+03 | 4.25E+03 | 4.00E+00 | 1.52E-04 | 3.41E+05 | 3.41E+05 |
| schimmed  | M_PI | 59648  | 4.01E-01 | -3.27E+01 | 7.80E+01 | 1.84E+01 | 1.46E+01  | 4.89E+01 | 7.69E-01 | 3.06E-01 | -2.82E+03 | 4.37E+03 | 3.69E+00 | 1.13E-04 | 7.77E+05 | 7.77E+05 |
| sclecitr  | F_Ba | 185854 | 7.74E-01 | 2.95E+01  | 2.35E+01 | 3.67E+00 | -2.23E+01 | 1.02E+02 | 2.30E+00 | 2.23E-01 | 3.96E+02  | 2.19E+03 | 2.09E+00 | 1.51E-04 | 1.60E+06 | 1.60E+06 |
| sclescle  | F_As | 25516  | 3.66E-02 | -5.87E+01 | 9.90E+01 | 1.24E+01 | 4.10E+01  | 1.34E+01 | 1.53E+00 | 5.70E-01 | -2.39E+02 | 4.06E+02 | 4.40E+00 | 4.42E-04 | 2.76E+05 | 2.76E+05 |
| sebaverm  | F_Ba | 93925  | 8.26E-01 | 2.76E+01  | 2.27E+01 | 4.87E+00 | -3.21E+02 | 4.00E+02 | 1.04E+01 | 1.27E-01 | -2.26E+02 | 5.58E+02 | 1.62E+00 | 1.84E-04 | 7.64E+05 | 7.64E+05 |
| sesaindi  | P_Eu | 124077 | 3.78E-01 | 3.58E+01  | 5.45E+01 | 3.25E+00 | -4.81E+01 | 2.50E+02 | 1.93E+00 | 3.13E-01 | -3.00E+02 | 9.17E+02 | 2.63E+00 | 4.92E-05 | 1.68E+06 | 1.68E+06 |
| setaital  | P_Mo | 132962 | 4.11E-01 | -1.08E+01 | 1.00E+02 | 7.02E+00 | -5.28E+01 | 2.05E+02 | 1.68E+00 | 3.60E-01 | -4.05E+02 | 9.57E+02 | 3.05E+00 | 6.96E-05 | 1.72E+06 | 1.72E+06 |
| setavari  | P_Mo | 141793 | 4.33E-01 | 3.14E+01  |          |          |           |          |          |          |           |          |          |          |          |          |

|           |      |        |          |           |          |          |           |          |          |          |           |          |          |          |          |          |
|-----------|------|--------|----------|-----------|----------|----------|-----------|----------|----------|----------|-----------|----------|----------|----------|----------|----------|
| talastip  | F_As | 28254  | 7.89E-02 | -2.05E+02 | 2.35E+02 | 3.00E+01 | 2.75E+01  | 2.74E+01 | 3.70E+00 | 7.93E-01 | -1.55E+02 | 2.89E+02 | 3.75E+00 | 3.86E-04 | 2.54E+05 | 2.54E+05 |
| tarehass  | P_Eu | 146042 | 5.02E-01 | 1.78E+01  | 7.33E+01 | 4.69E+00 | -6.25E+01 | 2.68E+02 | 2.09E+00 | 4.54E-01 | -3.49E+02 | 8.84E+02 | 6.99E+00 | 7.70E-05 | 1.76E+06 | 1.76E+06 |
| tarsryri  | M_Mm | 170850 | 5.10E-02 | -2.50E+02 | 3.36E+02 | 3.00E+01 | 2.06E+01  | 1.56E+02 | 1.51E+00 | 1.40E-01 | -2.66E+02 | 1.63E+03 | 1.12E+00 | 1.70E-05 | 3.10E+06 | 3.10E+06 |
| telacirc  | M_Ne | 106708 | 3.87E-01 | 4.51E+01  | 1.76E+01 | 1.24E+00 | -1.00E+02 | 4.61E+02 | 1.28E+00 | 3.67E-01 | -2.90E+02 | 1.77E+02 | 1.58E+00 | 6.97E-05 | 1.60E+06 | 1.60E+06 |
| testcype  | F_Ba | 5495   | 2.88E-01 | -1.14E+01 | 7.24E+01 | 1.65E+00 | -6.91E+01 | 1.76E+02 | 7.29E+00 | 5.36E-01 | -3.47E+02 | 6.62E+02 | 3.35E+00 | 9.51E-04 | 6.52E+04 | 6.53E+04 |
| teittrh   | O_AI | 88673  | 4.09E-01 | -2.01E+01 | 9.14E+01 | 2.09E+00 | -2.98E+01 | 8.50E+01 | 1.60E+01 | 3.03E-01 | -1.11E+02 | 2.92E+02 | 2.53E+00 | 3.07E-04 | 1.00E+06 | 1.00E+06 |
| thectrah  | O_Ap | 9138   | 4.78E-01 | 1.32E+01  | 2.58E+01 | 1.42E+00 | 5.79E+01  | 4.05E+01 | 1.92E+00 | 1.12E-01 | -2.87E+02 | 5.36E+02 | 3.90E+00 | 1.41E-03 | 1.12E+05 | 1.12E+05 |
| theiannu  | O_Al | 9485   | 3.96E-01 | 2.47E+01  | 5.37E+00 | 3.03E+00 | -1.13E+02 | 1.71E+02 | 6.99E+00 | 5.39E-01 | -1.22E+02 | 2.98E+02 | 3.49E+00 | 6.54E-04 | 8.64E+04 | 8.65E+04 |
| theiequi  | O_AI | 8309   | 7.02E-01 | 1.92E+01  | 1.50E+01 | 8.70E+00 | -1.33E+01 | 7.18E+01 | 2.62E+00 | 2.44E-01 | 3.68E+01  | 3.15E+02 | 1.02E+00 | 1.67E-03 | 6.28E+04 | 6.29E+04 |
| theiparv  | O_AI | 20708  | 3.23E-01 | 2.40E+01  | 6.33E+00 | 3.46E+00 | -1.55E+02 | 2.21E+02 | 7.72E+00 | 5.44E-01 | -4.95E+01 | 2.33E+02 | 2.76E+00 | 7.01E-04 | 2.07E+05 | 2.07E+05 |
| thelster  | F_As | 15149  | 5.04E-01 | -1.38E+00 | 5.32E+01 | 1.23E+01 | -2.26E+02 | 3.02E+02 | 1.33E+01 | 2.55E-01 | -2.23E+02 | 4.40E+02 | 3.63E+00 | 4.56E-04 | 1.53E+05 | 1.53E+05 |
| theocaca  | P_Eu | 124320 | 3.96E-01 | 1.93E+01  | 7.40E+01 | 4.17E+00 | -2.14E+01 | 3.33E+02 | 1.29E+00 | 5.47E-01 | -4.00E+02 | 1.08E+03 | 4.29E+00 | 4.54E-05 | 1.71E+06 | 1.71E+06 |
| toxocani  | M_Ne | 50928  | 2.17E-02 | -6.48E+02 | 7.18E+02 | 1.68E+01 | -6.69E+02 | 1.26E+03 | 3.83E+00 | 9.57E-01 | -9.33E+02 | 3.07E+03 | 5.04E+00 | 7.43E-05 | 7.76E+05 | 7.76E+05 |
| toxogond  | O_AI | 68674  | 8.66E-01 | -2.62E+03 | 2.99E+03 | 1.36E+01 | 3.76E+02  | 1.87E+01 | 8.93E-01 | 1.72E-02 | 2.48E+01  | 5.25E+02 | 5.71E+00 | 2.63E-04 | 9.58E+05 | 9.58E+05 |
| tramvers  | F_Ba | 77575  | 8.76E-01 | 3.21E+00  | 5.16E+01 | 9.83E+00 | -8.39E+00 | 9.72E+01 | 1.46E+00 | 1.23E-01 | 4.33E+02  | 2.21E+03 | 6.73E-01 | 2.99E-04 | 6.06E+05 | 6.06E+05 |
| tremmese  | F_Ba | 37703  | 3.32E-01 | -3.89E+01 | 8.32E+01 | 2.61E+01 | -3.35E+01 | 1.05E+02 | 2.47E+00 | 3.80E-01 | -1.59E+02 | 3.33E+02 | 5.41E+00 | 2.75E-04 | 4.02E+05 | 4.02E+05 |
| tribcast  | M_In | 124660 | 5.31E-01 | 1.05E+01  | 3.71E+01 | 1.10E+01 | 2.66E+01  | 1.14E+02 | 6.92E-01 | 2.76E-01 | -2.84E+03 | 4.29E+03 | 3.23E+00 | 1.14E-04 | 1.51E+06 | 1.51E+06 |
| tricadha  | M_Pl | 169887 | 6.02E-01 | 3.68E+01  | 5.82E+01 | 2.16E+00 | -7.60E+01 | 2.77E+02 | 1.84E+00 | 3.69E-01 | -3.24E+02 | 1.25E+03 | 3.50E+00 | 7.53E-05 | 2.09E+06 | 2.09E+06 |
| tricchia  | F_Ba | 28444  | 9.22E-02 | -1.26E+02 | 1.70E+02 | 2.60E+01 | 3.89E+01  | 1.37E+01 | 1.79E+00 | 5.89E-01 | -2.09E+02 | 3.41E+02 | 4.68E+00 | 3.92E-04 | 2.84E+05 | 2.84E+05 |
| tricomana | M_Mm | 170926 | 2.38E-02 | 4.48E+01  | 3.98E+01 | 5.45E+00 | 5.71E+01  | 8.00E+01 | 9.23E-01 | 1.54E-01 | -1.29E+02 | 1.35E+03 | 9.42E-01 | 1.64E-05 | 3.13E+06 | 3.13E+06 |
| tricmats  | F_Ba | 84964  | 8.37E-01 | -4.71E+01 | 9.95E+01 | 2.18E+01 | -2.77E+01 | 8.66E+01 | 2.39E+00 | 1.50E-01 | 2.49E+01  | 2.45E+02 | 8.74E-01 | 1.38E-04 | 6.47E+05 | 6.47E+05 |
| tricomuri | M_Ne | 71271  | 6.41E-01 | -9.28E+01 | 1.45E+02 | 3.00E+01 | -4.41E+00 | 1.70E+02 | 1.14E+00 | 2.63E-01 | -5.52E+02 | 2.04E+03 | 2.11E+00 | 2.42E-04 | 7.66E+05 | 7.66E+05 |
| tricrege  | M_Pl | 24957  | 1.17E-01 | -2.52E+02 | 2.95E+02 | 2.94E+01 | -5.81E+01 | 2.17E+02 | 1.57E+00 | 2.99E-01 | -3.67E+03 | 5.31E+03 | 5.10E+00 | 1.30E-04 | 4.08E+05 | 4.09E+05 |
| tricspir  | M_Ne | 138810 | 3.85E-01 | -1.22E+01 | 8.11E+01 | 1.55E+00 | 2.30E+01  | 3.77E+01 | 3.80E+00 | 3.71E-01 | -2.07E+02 | 4.66E+02 | 2.67E+00 | 1.18E-04 | 1.64E+06 | 1.64E+06 |
| tricsuis  | M_Ne | 63901  | 5.54E-01 | -8.98E+01 | 1.41E+02 | 3.00E+01 | -4.82E+02 | 5.39E+02 | 2.48E+01 | 6.81E-02 | -7.30E+01 | 4.15E+02 | 1.11E+00 | 2.02E-04 | 7.30E+05 | 7.31E+05 |
| trictic   | M_Ne | 30745  | 6.24E-01 | -9.69E+01 | 1.48E+02 | 3.00E+01 | -8.63E+00 | 8.92E+01 | 1.28E+00 | 2.40E-01 | -2.43E+02 | 7.88E+02 | 1.91E+00 | 2.54E-04 | 3.17E+05 | 3.17E+05 |
| trifprat  | P_Eu | 137769 | 2.85E-01 | -7.49E-01 | 9.16E+01 | 6.59E+00 | -3.09E+01 | 2.12E+02 | 1.73E+00 | 4.26E-01 | -1.13E+02 | 7.71E+02 | 1.94E+00 | 4.64E-05 | 1.91E+06 | 1.91E+06 |
| trustrun  | M_Mm | 140565 | 9.94E-02 | 5.62E+01  | 3.68E+01 | 1.88E+00 | -4.52E+02 | 7.06E+02 | 4.75E+00 | 1.92E-01 | -2.02E+02 | 1.67E+03 | 1.28E+00 | 2.19E-05 | 2.48E+06 | 2.48E+06 |
| ursumari  | M_Mm | 176409 | 9.05E-02 | 6.19E+01  | 3.53E+01 | 1.39E+00 | -2.97E+02 | 5.77E+02 | 3.52E+00 | 1.24E-01 | -3.28E+02 | 1.78E+03 | 1.16E+00 | 1.63E-05 | 3.21E+06 | 3.21E+06 |
| ustimayd  | F_Ba | 4762   | 3.59E-01 | 3.22E+00  | 3.54E+01 | 1.75E+00 | -1.44E+02 | 2.34E+02 | 1.26E+01 | 4.33E-01 | -2.19E+02 | 4.33E+02 | 5.43E+00 | 8.84E-04 | 5.35E+04 | 5.36E+04 |
| ustispec  | F_Ba | 17942  | 1.07E-01 | 3.66E+00  | 8.35E+01 | 1.26E+00 | 6.66E+00  | 1.17E+02 | 3.02E+00 | 8.93E-01 | -1.31E+02 | 1.05E+03 | 6.58E-01 | 3.33E-04 | 2.01E+05 | 2.01E+05 |
| ventinae  | F_Eu | 23454  | 6.69E-01 | -3.94E+01 | 9.05E+01 | 2.37E+01 | 2.54E+01  | 5.08E+01 | 1.57E+00 | 2.76E-01 | 1.36E+02  | 9.00E+01 | 1.42E+00 | 4.10E-04 | 2.00E+05 | 2.00E+05 |
| vicupaco  | M_Mm | 178901 | 6.00E-02 | -2.46E+01 | 1.12E+02 | 9.71E+00 | 1.94E+01  | 2.08E+02 | 1.30E+00 | 1.79E-01 | -2.37E+02 | 1.53E+03 | 1.14E+00 | 1.63E-05 | 3.20E+06 | 3.20E+06 |
| vitivini  | P_Eu | 133606 | 2.94E-01 | -5.61E+01 | 1.47E+02 | 9.43E+00 | 3.00E+00  | 1.42E+02 | 1.42E+00 | 3.44E-01 | -2.22E+02 | 9.97E+02 | 1.40E+00 | 7.71E-05 | 1.92E+06 | 1.92E+06 |
| vollemer  | M_In | 83467  | 2.75E-01 | -2.93E+02 | 3.70E+02 | 3.00E+01 | 1.46E+01  | 2.38E+02 | 9.38E-01 | 6.84E-01 | 1.26E+03  | 3.04E+03 | 9.01E-01 | 6.21E-05 | 1.22E+06 | 1.22E+06 |
| volvcart  | P_Ch | 97115  | 6.20E-02 | -1.87E+02 | 2.64E+02 | 2.35E+01 | -1.22E+03 | 1.48E+03 | 1.01E+01 | 7.55E-01 | 1.75E+02  | 2.89E+02 | 1.73E+00 | 6.98E-05 | 1.32E+06 | 1.32E+06 |
| volvvolv  | F_Ba | 63833  | 1.62E-01 | -4.33E+02 | 4.87E+02 | 2.01E+01 | 1.01E+01  | 4.21E+01 | 9.05E+00 | 6.89E-01 | -1.00E+02 | 2.49E+02 | 2.63E+00 | 2.80E-04 | 5.59E+05 | 5.59E+05 |
| wallsebi  | F_Ba | 15871  | 3.34E-01 | 1.59E+01  | 9.15E+01 | 2.04E-01 | 2.98E+01  | 1.55E+01 | 5.94E+00 | 5.34E-01 | -2.86E+03 | 4.38E+03 | 1.81E+00 | 1.69E-03 | 1.42E+05 | 1.42E+05 |
| wolfcoco  | F_Ba | 73155  | 8.57E-01 | 3.82E+00  | 4.92E+01 | 1.02E+01 | -7.24E+00 | 8.65E+01 | 1.53E+00 | 1.40E-01 | 3.93E+02  | 2.15E+03 | 7.36E-01 | 2.84E-04 | 5.68E+05 | 5.69E+05 |
| wuchbanc  | M_Ne | 64354  | 8.87E-03 | -2.93E+02 | 3.26E+02 | 2.90E+01 | -7.65E+01 | 1.72E+02 | 6.05E+00 | 2.33E-01 | -1.48E+02 | 3.78E+02 | 3.45E+00 | 1.03E-04 | 8.26E+05 | 8.26E+05 |
| xenotrop  | M_Am | 194571 | 5.63E-02 | 2.40E+01  | 6.24E+01 | 5.99E+00 | -1.10E+01 | 1.66E+02 | 2.62E+00 | 8.90E-02 | -1.45E+02 | 1.14E+03 | 1.16E+00 | 1.69E-05 | 3.41E+06 | 3.41E+06 |
| xiphmacu  | M_Fs | 197110 | 2.79E-01 | 5.13E+00  | 7.89E+01 | 6.41E+00 | -1.34E+02 | 2.80E+02 | 4.07E+00 | 1.67E-01 | -1.61E+02 | 1.01E+03 | 1.45E+00 | 2.83E-05 | 2.99E+06 | 2.99E+06 |
| zea_mays  | P_Mo | 147949 | 3.45E-01 | -3.36E+02 | 4.24E+02 | 3.00E+01 | -1.58E+01 | 2.18E+02 | 1.14E+00 | 5.70E-01 | -7.02E+02 | 1.39E+03 | 4.78E+00 | 6.05E-05 | 1.99E+06 | 1.99E+06 |
| zizijuju  | P_Eu | 123766 | 4.28E-01 | 3.49E+01  | 6.45E+01 | 2.78E+00 | -1.05E+02 | 4.10E+02 | 1.81E+00 | 5.15E-01 | -1.92E+02 | 9.00E+02 | 4.24E+00 | 5.42E-05 | 1.67E+06 | 1.67E+06 |
| zostmari  | P_Mo | 87945  | 6.01E-01 | 1.96E+00  | 8.21E+01 | 5.27E+00 | -4.36E+01 | 3.30E+02 | 1.35E+00 | 3.85E-01 | 6.39E+02  | 2.06E+03 | 1.65E+00 | 8.15E-05 | 1.09E+06 | 1.09E+06 |

Supplementary Table S3. ILD components.

(A) Tetrapod two components

| SpecID    | Species                             | TaxonID | a1     | mode1 | median1 | width1 <sup>a)</sup> | boder1 <sup>b)</sup> | a2     | mode2  | median2 | width2  |
|-----------|-------------------------------------|---------|--------|-------|---------|----------------------|----------------------|--------|--------|---------|---------|
| tinagutt  | <i>Tinamus guttatus</i>             | M_Av    | 0.0782 | 86.02 | 104.41  | 48.55                | 144.65               | 0.9218 | 387.46 | 981.12  | 1610.41 |
| acancho   | <i>Acanthisitta chloris</i>         | M_Av    | 0.104  | 84.32 | 110.45  | 70.15                | 174.73               | 0.896  | 433.25 | 995.33  | 1493.75 |
| mesiuic   | <i>Mesitornis unicolor</i>          | M_Av    | 0.1031 | 86.28 | 115.63  | 79.69                | 181.04               | 0.8969 | 447.64 | 999.99  | 1460.69 |
| corvbrac  | <i>Corvus brachyrhynchos</i>        | M_Av    | 0.0903 | 84.06 | 101.29  | 45.22                | 144.33               | 0.9097 | 374.4  | 1017.94 | 1775.28 |
| sericana  | <i>Serinus canaria</i>              | M_Av    | 0.0935 | 83.81 | 101.07  | 45.3                 | 145.87               | 0.9065 | 377.99 | 1020.85 | 1770.08 |
| apalvitt  | <i>Apaloderma vittatum</i>          | M_Av    | 0.0786 | 87.7  | 116.13  | 77.52                | 170.37               | 0.9214 | 448.64 | 1021.43 | 1519.8  |
| ptergutt  | <i>Pterocles gutturalis</i>         | M_Av    | 0.0809 | 87.02 | 116.58  | 80.67                | 174.32               | 0.9191 | 461.84 | 1025.9  | 1491.02 |
| colistri  | <i>Collis striatus</i>              | M_Av    | 0.0933 | 87.11 | 114.24  | 72.77                | 178.93               | 0.9067 | 468.17 | 1027.81 | 1477.6  |
| taengutt  | <i>Taeniopygia guttata</i>          | M_Av    | 0.0875 | 84.77 | 103.04  | 47.94                | 150.22               | 0.9125 | 380.09 | 1028.9  | 1796.21 |
| bucerhin  | <i>Buceros rhinoceros</i>           | M_Av    | 0.0884 | 87.05 | 120.64  | 93.98                | 184.89               | 0.9116 | 454.76 | 1031.04 | 1528.97 |
| meronubi  | <i>Merops nubicus</i>               | M_Av    | 0.0883 | 86.45 | 116.56  | 83.08                | 180.19               | 0.9117 | 464.77 | 1032.97 | 1502.16 |
| nestnota  | <i>Nestor notabilis</i>             | M_Av    | 0.0956 | 85.23 | 115.95  | 84.97                | 184.24               | 0.9044 | 455.21 | 1034.47 | 1537.14 |
| melegall  | <i>Meleagris gallopavo</i>          | M_Av    | 0.1521 | 80.44 | 107.9   | 73.91                | 198.1                | 0.8479 | 393.11 | 1036.15 | 1780.53 |
| geosfort  | <i>Geospiza fortis</i>              | M_Av    | 0.087  | 84.1  | 101.69  | 46.12                | 146.71               | 0.913  | 391.8  | 1039.26 | 1774.18 |
| manavite  | <i>Manacus vitellinus</i>           | M_Av    | 0.0801 | 85.69 | 103.92  | 47.82                | 145.27               | 0.9199 | 387.78 | 1040.59 | 1793.97 |
| chiamacq  | <i>Chlamydotis macqueenii</i>       | M_Av    | 0.0851 | 87.24 | 121.9   | 98.58                | 184.41               | 0.9149 | 471.18 | 1044.69 | 1514.75 |
| euryhell  | <i>Eurypyga helias</i>              | M_Av    | 0.0881 | 87.25 | 121.33  | 94.3                 | 187.73               | 0.9119 | 477.32 | 1049.63 | 1510.97 |
| calyanna  | <i>Calypte anna</i>                 | M_Av    | 0.0937 | 85.95 | 104.59  | 48.91                | 152.36               | 0.9063 | 394.71 | 1050.73 | 1799.09 |
| pseuhumi  | <i>Pseudopodoces humilis</i>        | M_Av    | 0.1121 | 82.74 | 100.94  | 47.75                | 159.63               | 0.8879 | 369.84 | 1051.14 | 1923.32 |
| balereg   | <i>Balearica regulorum</i>          | M_Av    | 0.0879 | 87.37 | 119.81  | 89.56                | 184.06               | 0.9121 | 465.68 | 1055.1  | 1562.57 |
| sturvulg  | <i>Sturnus vulgaris</i>             | M_Av    | 0.1011 | 83.23 | 99.31   | 42.27                | 146.79               | 0.8989 | 360.93 | 1056.06 | 1968.12 |
| caprcaro  | <i>Caprimulgus carolinensis</i>     | M_Av    | 0.0898 | 87.9  | 118.18  | 82.05                | 183.64               | 0.9102 | 483.4  | 1057.13 | 1513.21 |
| cotujapo  | <i>Coturnix japonica</i>            | M_Av    | 0.1381 | 80.92 | 104.22  | 61.64                | 175.42               | 0.8619 | 341.28 | 1058.05 | 2096.85 |
| phaelept  | <i>Phaethon lepturus</i>            | M_Av    | 0.0867 | 87.03 | 118.21  | 85.7                 | 181.45               | 0.9133 | 474.69 | 1064.17 | 1559.13 |
| pelecris  | <i>Pelecanus crispus</i>            | M_Av    | 0.0879 | 87.15 | 122.55  | 100.39               | 190.17               | 0.9121 | 485.12 | 1064.31 | 1527.98 |
| fulmglac  | <i>Fulmarus glacialis</i>           | M_Av    | 0.0796 | 86.94 | 117.88  | 86.16                | 177.78               | 0.9204 | 481.64 | 1066.74 | 1544.7  |
| caricris  | <i>Cariacus cristata</i>            | M_Av    | 0.0852 | 87.45 | 120.12  | 90.46                | 183.07               | 0.9148 | 475.7  | 1068.05 | 1567.06 |
| leptdisc  | <i>Leptosomus discolor</i>          | M_Av    | 0.0912 | 86.69 | 119.15  | 89.82                | 186                  | 0.9088 | 464.88 | 1074.62 | 1621.34 |
| gavistel  | <i>Gavia stellata</i>               | M_Av    | 0.07   | 87.58 | 115.53  | 76.61                | 171.7                | 0.93   | 492.42 | 1077.06 | 1542.06 |
| gallgall  | <i>Gallus gallus</i>                | M_Av    | 0.1372 | 81.69 | 102.37  | 54.27                | 168.81               | 0.8628 | 350.55 | 1086.6  | 2138.12 |
| phalcarb  | <i>Phalacrocorax carbo</i>          | M_Av    | 0.0722 | 87.33 | 117.09  | 81.89                | 172.44               | 0.9278 | 490.03 | 1087.89 | 1578.34 |
| taureyrt  | <i>Tauraco erythrolophus</i>        | M_Av    | 0.0837 | 86.77 | 117.96  | 86.58                | 180.84               | 0.9163 | 473.88 | 1089.01 | 1632.95 |
| tytoalba  | <i>Tyto alba</i>                    | M_Av    | 0.0641 | 87.67 | 113.82  | 70.93                | 163.63               | 0.9359 | 486.98 | 1091.22 | 1597.76 |
| meloundu  | <i>Melopsittacus undulatus</i>      | M_Av    | 0.1005 | 82.9  | 103.37  | 53.85                | 159.94               | 0.8995 | 400.92 | 1092.01 | 1908.48 |
| colulivi  | <i>Columba livia</i>                | M_Av    | 0.0968 | 84.36 | 106.35  | 57.73                | 160.88               | 0.9032 | 401.91 | 1094.14 | 1909.71 |
| chaepela  | <i>Chaetura pelagica</i>            | M_Av    | 0.0853 | 85.89 | 105.57  | 51.63                | 155.56               | 0.9147 | 416.72 | 1100.04 | 1870.29 |
| ficealbi  | <i>Ficedula albicollis</i>          | M_Av    | 0.0934 | 83.68 | 101.84  | 47.64                | 145.21               | 0.9066 | 378.58 | 1102.29 | 2023.72 |
| corvcorn  | <i>Corvus cornix</i>                | M_Av    | 0.0864 | 85.57 | 105.01  | 50.99                | 158.36               | 0.9136 | 381.42 | 1106.35 | 2061.12 |
| cucucano  | <i>Cuculus canorus</i>              | M_Av    | 0.0966 | 84.05 | 104.66  | 54.14                | 160.9                | 0.9034 | 416.65 | 1115.44 | 1918.69 |
| nippnipp  | <i>Nipponia nippon</i>              | M_Av    | 0.0929 | 85.37 | 106.74  | 56.1                 | 157.35               | 0.9071 | 411.15 | 1124.43 | 1962.48 |
| halialbi  | <i>Haliaeetus albicilla</i>         | M_Av    | 0.0759 | 88.03 | 120.63  | 90.16                | 184.91               | 0.9241 | 491.61 | 1125.33 | 1683.3  |
| falcpere  | <i>Falco peregrinus</i>             | M_Av    | 0.1015 | 85.19 | 110.04  | 65.9                 | 172.37               | 0.8985 | 418.12 | 1139.22 | 1989.87 |
| halileuc  | <i>Haliaeetus leucocephalus</i>     | M_Av    | 0.1116 | 85.34 | 108.71  | 61.73                | 173.15               | 0.8884 | 408.78 | 1148.81 | 2061.54 |
| falccher  | <i>Falco cherrug</i>                | M_Av    | 0.1006 | 85.17 | 112.38  | 72.93                | 178.78               | 0.8994 | 424.96 | 1149.18 | 1996.96 |
| charvoci  | <i>Charadrius vociferus</i>         | M_Av    | 0.0788 | 87.53 | 109.44  | 57.53                | 157.39               | 0.9212 | 426.81 | 1152.24 | 1992.02 |
| zonoalbi  | <i>Zonotrichia albicollis</i>       | M_Av    | 0.0793 | 85.18 | 103     | 46.76                | 147.09               | 0.9207 | 389.82 | 1152.97 | 2158.74 |
| egregarz  | <i>Egretta garzetta</i>             | M_Av    | 0.0748 | 87.46 | 109.06  | 56.76                | 154.84               | 0.9252 | 426.64 | 1155.46 | 2002.43 |
| parumajo  | <i>Parus major</i>                  | M_Av    | 0.1106 | 82.58 | 104.4   | 57.58                | 171.93               | 0.8893 | 375.51 | 1166.71 | 2305.43 |
| aptefors  | <i>Aptenodytes forsteri</i>         | M_Av    | 0.0833 | 87.48 | 110.71  | 61.01                | 162.29               | 0.9167 | 421.96 | 1180.7  | 2106.18 |
| opishoaz  | <i>Opisthocomus hoazin</i>          | M_Av    | 0.0576 | 88.25 | 106.63  | 48.31                | 142.37               | 0.9424 | 438.72 | 1194.96 | 2078.42 |
| pygoadel  | <i>Pygoscelis adeliae</i>           | M_Av    | 0.0658 | 87.85 | 110.31  | 59.27                | 156.89               | 0.9342 | 435.61 | 1198.27 | 2110.05 |
| aquichry  | <i>Aquila chrysaetos</i>            | M_Av    | 0.113  | 86.1  | 110.52  | 64.47                | 180.91               | 0.887  | 413.19 | 1207.95 | 2249.33 |
| picopube  | <i>Picoides pubescens</i>           | M_Av    | 0.0971 | 86.21 | 110.49  | 64.08                | 177.51               | 0.9029 | 474.17 | 1220.34 | 2024.26 |
| calipugn  | <i>Calidris pugnax</i>              | M_Av    | 0.1038 | 88.06 | 110.39  | 58.66                | 175.74               | 0.8962 | 418.93 | 1227.52 | 2291.19 |
| anasplat  | <i>Anas platyrhynchos</i>           | M_Av    | 0.0718 | 88.21 | 106.92  | 49.12                | 146.03               | 0.9282 | 400.09 | 1245.81 | 2417.25 |
| ansecygn  | <i>Anser cygnoides</i>              | M_Av    | 0.0835 | 87.16 | 109.98  | 59.93                | 167.88               | 0.9165 | 412.72 | 1274.82 | 2485.89 |
| strucame  | <i>Struthio camelus</i>             | M_Av    | 0.0605 | 88.76 | 109.5   | 54.38                | 155.59               | 0.9395 | 439.9  | 1278.13 | 2362.07 |
| apteaus   | <i>Apteryx australis</i>            | M_Av    | 0.0769 | 87.95 | 117.08  | 78.06                | 175.91               | 0.9231 | 453.8  | 1309.24 | 2394.34 |
| xenotrop  | <i>Xenopus tropicalis</i>           | M_Am    | 0.1605 | 84.53 | 137.44  | 172.45               | 275.99               | 0.8396 | 506.96 | 1407.9  | 2493.04 |
| protmucr  | <i>Protobothrops mucrosquamatus</i> | M_Rp    | 0.1194 | 89.15 | 154.38  | 215.51               | 292.25               | 0.8806 | 640.83 | 1461.14 | 2172.74 |
| pythbivi  | <i>Python bivittatus</i>            | M_Rp    | 0.1015 | 88.85 | 152.78  | 211.79               | 278.23               | 0.8985 | 633.48 | 1465.3  | 2210.83 |
| pyndcris  | <i>Condylura cristata</i>           | M_Mm    | 0.1964 | 83.3  | 151.71  | 219.52               | 323.37               | 0.8036 | 521.3  | 1628.1  | 3152.15 |
| allisine  | <i>Alligator sinensis</i>           | M_Rp    | 0.1003 | 87.83 | 148.13  | 192.53               | 239.18               | 0.8997 | 500.15 | 1630.73 | 3262.49 |
| camebat   | <i>Camelus bactrianus</i>           | M_Mm    | 0.1786 | 85.56 | 157.14  | 246.85               | 313.11               | 0.8214 | 526.29 | 1637.35 | 3136.12 |
| ornianat  | <i>Ornithorhynchus anatinus</i>     | M_Mm    | 0.1446 | 93.76 | 181.05  | 293.72               | 325.35               | 0.8554 | 613.17 | 1638.68 | 2787.24 |
| leptwedd  | <i>Leptonychotes weddellii</i>      | M_Mm    | 0.1916 | 85.27 | 149.5   | 214.03               | 301.52               | 0.8084 | 477.68 | 1651.44 | 3428.65 |
| allimiss  | <i>Alligator mississippiensis</i>   | M_Rp    | 0.1135 | 86.73 | 151.3   | 211.1                | 259.42               | 0.8865 | 502.2  | 1654.15 | 3350.89 |
| cameadm   | <i>Camelus dromedarius</i>          | M_Mm    | 0.1771 | 85.89 | 159.18  | 252.01               | 318.98               | 0.8229 | 541.49 | 1663.78 | 3156.84 |
| pteralect | <i>Pteropus alecto</i>              | M_Mm    | 0.1915 | 85.13 | 159.27  | 252.87               | 332.9                | 0.8085 | 526.65 | 1665.08 | 3251.99 |
| thamsirt  | <i>Thamnophis sirtalis</i>          | M_Rp    | 0.1205 | 88.5  | 151.3   | 204.75               | 297.13               | 0.8795 | 650.63 | 1666.73 | 2745.53 |
| cameferu  | <i>Camelus ferus</i>                | M_Mm    | 0.1817 | 86.17 | 161.05  | 255.87               | 327.25               | 0.8183 | 549.61 | 1667.15 | 3134.56 |
| turstrun  | <i>Tursiops truncatus</i>           | M_Mm    | 0.2218 | 86.11 | 163.03  | 261.5                | 368.03               | 0.7782 | 614.36 | 1674.76 | 2871.36 |
| sorearan  | <i>Sorex araneus</i>                | M_Mm    | 0.1838 | 80.96 | 114.18  | 93.26                | 225.06               | 0.8162 | 505.08 | 1682.43 | 3324.24 |
| chelmyda  | <i>Chelonia mydas</i>               | M_Rp    | 0.0457 | 87.92 | 110.52  | 60.27                | 155.79               | 0.9543 | 554.04 | 1688.27 | 3196.39 |
| vicupaco  | <i>Vicugna pacos</i>                | M_Mm    | 0.1943 | 85.37 | 161.36  | 263.04               | 342.93               | 0.8057 | 547.67 | 1691.59 | 3236.38 |
| ptervamp  | <i>Pteropus vampyrus</i>            | M_Mm    | 0.203  | 85.13 | 162.01  | 266.71               | 344.02               | 0.797  | 521.77 | 1692.93 | 3367.4  |
| rousaegy  | <i>Rousettus aegyptiacus</i>        | M_Mm    | 0.181  | 85.22 | 155.59  | 237.07               | 315.35               | 0.819  | 495.47 | 1694.97 | 3527.7  |
| eptefusc  | <i>Eptesicus fuscus</i>             | M_Mm    | 0.206  | 84.12 | 158.46  | 254.37               | 350.5                | 0.794  | 559.79 | 1697.45 | 3193.22 |
| panthodg  | <i>Panholops hodgsonii</i>          | M_Mm    | 0.1679 | 85.57 | 144.07  | 182.24               | 271.14               | 0.8321 | 508.77 | 1707.31 | 3413.94 |
| caviporc  | <i>Cavia porcellus</i>              | M_Mm    | 0.2003 | 81.99 | 144.83  | 211.05               | 322.39               | 0.7997 | 516.3  | 1745.22 | 3571.76 |
| ochoprin  | <i>Ochotona princeps</i>            | M_Mm    | 0.2344 | 84.29 | 146.61  | 202.79               | 342.65               | 0.7656 | 520.06 | 1754.48 | 3572.56 |
| bos_mutu  | <i>Bos mutus</i>                    | M_Mm    | 0.1878 | 86.02 | 159.46  | 245                  | 326.68               | 0.8122 | 544.67 | 1763.46 | 3466.03 |
| physcato  | <i>Physeter catodon</i>             | M_Mm    | 0.2061 | 86.45 | 169.88  | 292.71               | 375.26               | 0.7939 | 585.01 | 1784.46 | 3375.41 |
| cricgris  | <i>Cricetulus griseus</i>           | M_Mm    | 0.208  | 83.86 | 157.05  | 254.01               | 371.61               | 0.792  | 627.01 | 1791.92 | 3207.71 |
| marmarm   | <i>Marmota marmota</i>              | M_Mm    | 0.2213 | 85.01 | 169.77  | 294.29               | 391.23               | 0.7787 | 604.04 | 1792.61 | 3309.46 |
| lipovexi  | <i>Lipotes vexillifer</i>           | M_Mm    | 0.186  | 84.81 | 154.48  | 239.73               | 321.17               | 0.814  | 529.1  | 1798.08 | 3666.66 |
| orciorcia | <i>Orcinus orca</i>                 | M_Mm    | 0.1907 | 84.8  | 155.18  | 243.14               | 326.36               | 0.8093 | 516.25 | 1799.42 | 3756.09 |
| galevari  | <i>Galeoceratus variegatus</i>      | M_Mm    | 0.2147 | 86.4  | 171.19  | 293.48               | 379.29               | 0.7853 | 592.87 | 1802.07 | 3378.24 |
| myotdavi  | <i>Myotis davidii</i>               | M_Mm    | 0.1842 | 85.76 | 163.93  | 269.27               | 343.91               | 0.8158 | 582.05 | 1807.02 | 3445.54 |
| equucaba  | <i>Equus caballus</i>               | M_Mm    | 0.1923 | 86.69 | 171.79  | 294.25               | 359.02               | 0.8077 | 554.22 | 1810.42 | 3619.43 |
| equuprze  | <i>Equus przewalskii</i>            | M_Mm    | 0.1821 | 86.87 | 172     | 296.64               | 347.37               | 0.8179 | 567.59 | 1811.88 | 3532.63 |
| dipoordi  | <i>Dipodomys ordii</i>              | M_Mm    | 0.2077 | 84.6  | 155.46  |                      |                      |        |        |         |         |

|           |                                   |      |        |       |        |        |        |        |        |         |         |
|-----------|-----------------------------------|------|--------|-------|--------|--------|--------|--------|--------|---------|---------|
| myotluci  | <i>Myotis lucifugus</i>           | M_Mm | 0.1854 | 85.94 | 165.81 | 275.48 | 351.56 | 0.8146 | 581.77 | 1816.94 | 3493.96 |
| ictitrid  | <i>Ictidomys tridecemlineatus</i> | M_Mm | 0.2143 | 84.07 | 165.35 | 281.93 | 379.54 | 0.7857 | 576.96 | 1817.57 | 3531.17 |
| mesoura   | <i>Mesocricetus auratus</i>       | M_Mm | 0.2088 | 82.74 | 153.16 | 246.16 | 363.82 | 0.7912 | 577.23 | 1822.6  | 3548.11 |
| propocuq  | <i>Propithecus coquereli</i>      | M_Mm | 0.2143 | 84.8  | 164.22 | 275.8  | 356.77 | 0.7857 | 511.89 | 1824.12 | 3879.96 |
| ailumela  | <i>Ailuropoda melanoleuca</i>     | M_Mm | 0.191  | 85.95 | 167.64 | 287.82 | 348.7  | 0.809  | 556.59 | 1827.84 | 3635.87 |
| chryptic  | <i>Chrysemys picta</i>            | M_Rp | 0.0579 | 87.3  | 129.03 | 126.62 | 198.37 | 0.9421 | 531.7  | 1827.93 | 3819.52 |
| ursumari  | <i>Ursus maritimus</i>            | M_Mm | 0.1734 | 86.31 | 165.69 | 277.19 | 333.56 | 0.8266 | 558.5  | 1831.23 | 3645.92 |
| myotbhr   | <i>Myotis brandtii</i>            | M_Mm | 0.1865 | 86.08 | 167.8  | 284.94 | 352.18 | 0.8135 | 577.19 | 1837.55 | 3577.11 |
| microchr  | <i>Microtus ochrogaster</i>       | M_Mm | 0.213  | 82.99 | 157    | 261.55 | 385.43 | 0.787  | 627.34 | 1841.22 | 3378.1  |
| rattnorv  | <i>Rattus norvegicus</i>          | M_Mm | 0.2054 | 83.93 | 160.31 | 269.04 | 366.17 | 0.7946 | 580.08 | 1842.48 | 3587.94 |
| balaacut  | <i>Balaenoptera acutorostrata</i> | M_Mm | 0.1825 | 85.65 | 162.3  | 269.76 | 335.13 | 0.8175 | 529.42 | 1846.91 | 3865.98 |
| cerasimu  | <i>Ceratotherium simum</i>        | M_Mm | 0.202  | 85.52 | 171.91 | 310.63 | 373.33 | 0.798  | 570.64 | 1863.28 | 3703.81 |
| equuasini | <i>Equus asinus</i>               | M_Mm | 0.193  | 86.41 | 173.99 | 308.39 | 369.36 | 0.807  | 566.86 | 1864.72 | 3747.42 |
| bubabuba  | <i>Bubalus bubalis</i>            | M_Mm | 0.2034 | 85.82 | 167.9  | 284.63 | 364.08 | 0.7966 | 547.87 | 1878.46 | 3882.64 |
| felicatu  | <i>Felis catus</i>                | M_Mm | 0.2052 | 86.44 | 173.39 | 312.32 | 378.53 | 0.7948 | 567.38 | 1888.26 | 3812.76 |
| octodegud | <i>Octodon degus</i>              | M_Mm | 0.2178 | 81.15 | 145.85 | 221.06 | 347.17 | 0.7822 | 546.74 | 1891.79 | 3907.2  |
| fukodama  | <i>Fukomys damarensis</i>         | M_Mm | 0.2033 | 82.26 | 157.78 | 263.38 | 361.11 | 0.7967 | 564.42 | 1891.81 | 3840.64 |
| heteglab  | <i>Heterocephalus glaber</i>      | M_Mm | 0.2021 | 81.78 | 149.31 | 230.02 | 342.43 | 0.7978 | 530.69 | 1894.94 | 4046.07 |
| anolocar  | <i>Anolis carolinensis</i>        | M_Rp | 0.1104 | 90.28 | 161.73 | 245.45 | 330.11 | 0.8896 | 706.65 | 1926.14 | 3359.61 |
| chinlani  | <i>Chinchilla lanigera</i>        | M_Mm | 0.2061 | 83.25 | 164.36 | 286.64 | 376.79 | 0.7939 | 566.5  | 1930.27 | 3983.32 |
| ovisarie  | <i>Ovis aries</i>                 | M_Mm | 0.1575 | 85.61 | 152.66 | 223.34 | 288.46 | 0.8425 | 510.22 | 1938.4  | 4250.39 |
| tricmana  | <i>Trichechus manatus</i>         | M_Mm | 0.1933 | 84.92 | 162.1  | 270.89 | 344.99 | 0.8067 | 533.35 | 1942.8  | 4171.99 |
| bisobiso  | <i>Bison bison</i>                | M_Mm | 0.187  | 86.47 | 170.26 | 291.9  | 360.98 | 0.813  | 566.25 | 1952.41 | 4051.67 |
| caprhirc  | <i>Capra hircus</i>               | M_Mm | 0.1648 | 87.21 | 168.15 | 282.02 | 343.84 | 0.8352 | 591.9  | 1957.27 | 3928.66 |
| acinjuba  | <i>Acinonyx jubatus</i>           | M_Mm | 0.1845 | 87.72 | 179.78 | 327.92 | 377.87 | 0.8155 | 623.4  | 1958.45 | 3765.19 |
| pantigr   | <i>Panthera tigris</i>            | M_Mm | 0.1863 | 87.92 | 181.15 | 335.94 | 378.49 | 0.8136 | 612.41 | 1963.86 | 3833.74 |
| peromani  | <i>Peromyscus maniculatus</i>     | M_Mm | 0.2049 | 83.81 | 163.53 | 285.98 | 382.44 | 0.7951 | 611.61 | 1968.95 | 3860.47 |
| bos_taur  | <i>Bos taurus</i>                 | M_Mm | 0.1976 | 86.07 | 171.52 | 300.4  | 373.07 | 0.8024 | 548.39 | 1971.25 | 4245.9  |
| dasynove  | <i>Dasypus novemcinctus</i>       | M_Mm | 0.1874 | 85.71 | 167.63 | 280.05 | 345.01 | 0.8126 | 523.18 | 1987.12 | 4412.82 |
| mustputo  | <i>Mustela putorius</i>           | M_Mm | 0.2024 | 86.89 | 177.74 | 327.23 | 386.22 | 0.7976 | 551.85 | 1993.96 | 4309.52 |
| echitelf  | <i>Echinops telfairi</i>          | M_Mm | 0.2287 | 84.66 | 157.82 | 253.21 | 387.84 | 0.7713 | 599.14 | 2010.16 | 4051.69 |
| loxoafri  | <i>Loxodonta africana</i>         | M_Mm | 0.1893 | 85.64 | 167.98 | 289.24 | 355.5  | 0.8107 | 555.24 | 2010.68 | 4295.54 |
| canilupu  | <i>Canis lupus</i>                | M_Mm | 0.1972 | 86.28 | 177.51 | 327.88 | 383.18 | 0.8028 | 563.46 | 2021.92 | 4328.98 |
| sarcharr  | <i>Sarcophilus harrisii</i>       | M_Mm | 0.1874 | 92.59 | 210.77 | 430.56 | 411.88 | 0.8126 | 623.54 | 2029.49 | 4017.11 |
| mus_musc  | <i>Mus musculus</i>               | M_Mm | 0.2002 | 85.48 | 173.88 | 316.37 | 392    | 0.7998 | 589.67 | 2035.45 | 4237.39 |
| tarsyri   | <i>Tarsius syrichta</i>           | M_Mm | 0.2183 | 86.47 | 180.51 | 329.15 | 426.67 | 0.7817 | 686.44 | 2051.6  | 3778.91 |
| namngali  | <i>Nannospalax galili</i>         | M_Mm | 0.2238 | 83.52 | 170.75 | 316.29 | 423.08 | 0.7762 | 634.34 | 2095.3  | 4191.07 |
| sus_scro  | <i>Sus scrofa</i>                 | M_Mm | 0.2091 | 87.08 | 185.16 | 353.71 | 416.97 | 0.7909 | 621.09 | 2096.13 | 4261.01 |
| otolgarn  | <i>Otolemur garnettii</i>         | M_Mm | 0.2433 | 85.42 | 186.17 | 370.35 | 473.6  | 0.7567 | 676.6  | 2123    | 4084.6  |
| pelosine  | <i>Pelodiscus sinensis</i>        | M_Rp | 0.0709 | 86.28 | 148.7  | 216.65 | 244.2  | 0.9291 | 657.56 | 2125.52 | 4177.36 |
| micmuri   | <i>Microcebus murinus</i>         | M_Mm | 0.201  | 86.54 | 184.92 | 354.63 | 404.84 | 0.799  | 583.8  | 2133.88 | 4626.33 |
| pongabel  | <i>Pongo abelii</i>               | M_Mm | 0.2249 | 87.11 | 190.45 | 376.9  | 453.02 | 0.7751 | 658.52 | 2165.99 | 4313.81 |
| gekkiapo  | <i>Gekko japonicus</i>            | M_Rp | 0.0971 | 90.58 | 173.05 | 293.51 | 352.28 | 0.9029 | 882.48 | 2202.74 | 3534.51 |
| gorigori  | <i>Gorilla gorilla</i>            | M_Mm | 0.2205 | 86.85 | 190.27 | 380.41 | 450.5  | 0.7795 | 660.88 | 2237.46 | 4538.24 |
| rhinox    | <i>Rhinopithecus roxellana</i>    | M_Mm | 0.2329 | 87.21 | 194.27 | 394.46 | 483.37 | 0.7671 | 697.04 | 2238.8  | 4384.31 |
| erineuro  | <i>Erinaceus europaeus</i>        | M_Mm | 0.2332 | 83.56 | 154.41 | 233.35 | 427.82 | 0.7668 | 755.27 | 2260.97 | 4162.39 |
| elepewa   | <i>Elephantulus edwardii</i>      | M_Mm | 0.2233 | 84.02 | 168.76 | 306.86 | 407.72 | 0.7767 | 589.19 | 2269.48 | 5028.44 |
| orycuni   | <i>Oryctolagus cuniculus</i>      | M_Mm | 0.2216 | 86.51 | 191.84 | 401.67 | 461.9  | 0.7784 | 651.77 | 2288    | 4790.08 |
| saimboli  | <i>Saimiri boliviensis</i>        | M_Mm | 0.2347 | 86.79 | 196    | 408.88 | 498.09 | 0.7652 | 714.1  | 2289.89 | 4481.11 |
| jaicujacu | <i>Jaculus jaculus</i>            | M_Mm | 0.231  | 83.72 | 168.76 | 309.69 | 460.97 | 0.769  | 750.99 | 2290.97 | 4281.86 |
| pan_pani  | <i>Pan paniscus</i>               | M_Mm | 0.2216 | 87.43 | 199.01 | 415.12 | 479.04 | 0.7784 | 680.76 | 2299.26 | 4692.88 |
| colango   | <i>Colobus angolensis</i>         | M_Mm | 0.2155 | 86.63 | 190.59 | 382.55 | 442.32 | 0.7845 | 644.9  | 2303.8  | 4847.75 |
| chryasia  | <i>Chrysochloris asiatica</i>     | M_Mm | 0.2308 | 83.92 | 168.38 | 310.76 | 414.56 | 0.7692 | 571.19 | 2306.03 | 5291.75 |
| mandleuc  | <i>Mandrillus leucophaeus</i>     | M_Mm | 0.218  | 86.76 | 193.39 | 387.66 | 448.59 | 0.782  | 649.63 | 2327.82 | 4907.09 |
| aotunanc  | <i>Aotus nancymae</i>             | M_Mm | 0.2263 | 86.49 | 193.94 | 400.37 | 474.1  | 0.7737 | 661.67 | 2343.81 | 4943.46 |
| tupachin  | <i>Tupaia chinensis</i>           | M_Mm | 0.2098 | 86.1  | 183.29 | 340.56 | 445.53 | 0.7902 | 706.74 | 2365.64 | 4750.83 |
| calljacc  | <i>Callithrix jacchus</i>         | M_Mm | 0.2137 | 87.27 | 201.37 | 429.84 | 473.26 | 0.7863 | 682.3  | 2367.71 | 4908.17 |
| nomaleuc  | <i>Nomascus leucogenys</i>        | M_Mm | 0.2018 | 87.15 | 195.29 | 400.71 | 441.97 | 0.7982 | 666.68 | 2373.37 | 4982.18 |
| papianur  | <i>Papio anubis</i>               | M_Mm | 0.2307 | 88.41 | 210.42 | 456.99 | 512.49 | 0.7693 | 714.3  | 2387.59 | 4818.61 |
| macamula  | <i>Macaca mulatta</i>             | M_Mm | 0.2209 | 87.23 | 201.49 | 432.47 | 486.89 | 0.7791 | 689.24 | 2391.22 | 4962.51 |
| pan_trog  | <i>Pan troglodytes</i>            | M_Mm | 0.205  | 88.04 | 204.77 | 443.07 | 476.78 | 0.795  | 692.18 | 2441.91 | 5139.79 |
| chlosaba  | <i>Chlorocebus sabaeus</i>        | M_Mm | 0.2238 | 87.39 | 207.43 | 459.53 | 500.46 | 0.7762 | 684.75 | 2483.72 | 5322.25 |
| macafasc  | <i>Macaca fascicularis</i>        | M_Mm | 0.2184 | 87.47 | 207.24 | 458.72 | 500.94 | 0.7816 | 695.22 | 2493.48 | 5317.49 |
| cercatys  | <i>Cercocebus atys</i>            | M_Mm | 0.2135 | 87.25 | 204.3  | 444.29 | 482.37 | 0.7865 | 665.92 | 2506.14 | 5530.58 |
| macaneme  | <i>Macaca nemestrina</i>          | M_Mm | 0.2119 | 87.61 | 211.12 | 475.7  | 497.33 | 0.7881 | 680    | 2620.6  | 5874.21 |
| homosapi  | <i>Homo sapiens</i>               | M_Mm | 0.2141 | 89.36 | 222.15 | 507.36 | 519.37 | 0.7859 | 701.71 | 2631.42 | 5806.68 |
| monodom   | <i>Monodelphis domestica</i>      | M_Mm | 0.1826 | 92.72 | 232.73 | 534.1  | 479.27 | 0.8174 | 695.12 | 2665.03 | 5938.72 |
| latichal  | <i>Latimeria chalumnae</i>        | M_Sa | 0.0388 | 93.85 | 125.23 | 85.17  | 218.8  | 0.9612 | 985.35 | 2731.36 | 4788.33 |

(B) Deuterostomes and Cnidaria two components

| SpecId   | Species                         | TaxonID | a1     | mode1  | median1 | width1 | boder1 | a2     | mode2  | median2 | width2  |
|----------|---------------------------------|---------|--------|--------|---------|--------|--------|--------|--------|---------|---------|
| thelkita | <i>Thelohanellus kitauei</i>    | M_Cn    | 0.9937 | 20     | 23.55   | 27.11  | 185775 | 0.0063 | 20.55  | 21.92   | 5.28    |
| cioninte | <i>Ciona intestinalis</i>       | M_Ch    | 0.2243 | 55.15  | 100.94  | 170.21 | 192.09 | 0.7757 | 273.87 | 368.35  | 270.68  |
| takinubr | <i>Takifugu rubripes</i>        | M_Fs    | 0.4634 | 77.16  | 87.56   | 28.1   | 135.43 | 0.5366 | 173.37 | 458.58  | 802.37  |
| nemavect | <i>Nematostella vectensis</i>   | M_Cn    | 0.0997 | 76.92  | 91.17   | 37.74  | 110.58 | 0.9003 | 257.47 | 494.54  | 622     |
| cluphare | <i>Clupea harengus</i>          | M_Fs    | 0.2145 | 97.25  | 161.41  | 198.24 | 190.79 | 0.7855 | 216.68 | 589.24  | 1051.91 |
| cynosemi | <i>Cynoglossus semilaevis</i>   | M_Fs    | 0.366  | 85.28  | 96.9    | 31.59  | 147.23 | 0.634  | 222.29 | 592.06  | 1031.78 |
| branflor | <i>Branchiostoma floridae</i>   | M_Ch    | 0.1777 | 426.95 | 470.53  | 171.08 | 285.36 | 0.8223 | 245.53 | 601.34  | 964.44  |
| acrodigi | <i>Acropora digitifera</i>      | M_Cn    | 0.0792 | 94.71  | 104.92  | 35.2   | 124.07 | 0.9208 | 305.21 | 649.21  | 907.2   |
| notocori | <i>Notothenia coriiceps</i>     | M_Fs    | 0.3302 | 87.88  | 107.05  | 50.3   | 191.23 | 0.6698 | 311.37 | 750.51  | 1184.16 |
| sackkowa | <i>Saccoglossus kowalevskii</i> | M_He    | 0.169  | 106.14 | 176.6   | 206.06 | 232.91 | 0.831  | 350.91 | 825.33  | 1271.91 |
| laricroc | <i>Larimichthys crocea</i>      | M_Fs    | 0.4536 | 86.8   | 110.16  | 62.01  | 235.89 | 0.5464 | 321.82 | 869.97  | 1502.08 |
| lepiocul | <i>Lepisosteus oculatus</i>     | M_Fs    | 0.0467 | 91.67  | 102.79  | 31.17  | 128.77 | 0.9533 | 335.26 | 950.64  | 1757.88 |
| xiphmacu | <i>Xiphophorus maculatus</i>    | M_Fs    | 0.3857 | 81.11  | 96      | 39.27  | 196.05 | 0.6143 | 410.16 | 976.12  | 1505.83 |
| poecform | <i>Poecilia formosa</i>         | M_Fs    | 0.3805 | 81.33  | 97.04   | 41.36  | 201.45 | 0.6196 | 386.17 | 996.18  | 1659.93 |
| poecmexi | <i>Poecilia mexicana</i>        | M_Fs    | 0.3619 | 81.26  | 96.07   | 39.13  | 182.74 | 0.6381 | 349.4  | 1001.86 | 1810.56 |
| poeclati | <i>Poecilia latipinna</i>       | M_Fs    | 0.3624 | 81.34  | 96.22   | 39.29  | 183.6  | 0.6377 | 349.61 | 1012.81 | 1845.89 |
| pundnyer | <i>Pundamilia nyererei</i>      | M_Fs    | 0.4339 | 86.22  | 114.79  | 77.33  | 277.36 | 0.5661 | 374.18 | 1055.07 | 1898.28 |
| poecreti | <i>Poecilia reticulata</i>      | M_Fs    | 0.3692 | 81.44  | 97      | 41     | 199.37 | 0.6308 | 383.35 | 1055.35 | 1859    |
| haplburt | <i>Haplochromis burtoni</i>     | M_Fs    | 0.4325 | 86.52  | 115.25  | 77.66  | 279.88 | 0.5675 | 376.45 | 1066.26 | 1931.53 |
| maylzebr | <i>Maylandia zebra</i>          | M_Fs    | 0.4361 | 86.24  | 115.32  | 78.88  | 281.13 | 0.5639 | 373.48 | 1070.57 | 1954.08 |
| neolbric | <i>Neolamprologus brichardi</i> | M_Fs    | 0.4399 | 86.49  | 114.28  | 74.77  | 273.05 | 0.5601 | 377.89 | 1073.82 | 1928.35 |
| oryzlati | <i>Oryzias latipes</i>          | M_Fs    | 0.4535 | 76.08  | 93.31   | 45.55  | 227.35 | 0.5465 | 384.09 | 1074.96 | 1900.91 |
| oreonilo | <i>Oreochromis niloticus</i>    | M_Fs    | 0.4344 | 86.63  | 116.65  | 81.79  | 286.24 | 0.5656 | 380.19 | 1081.94 | 1959.74 |
| callimii | <i>Callorhynchus milii</i>      | M_Ch    | 0.0492 | 93.98  | 112.1   | 47.    |        |        |        |         |         |

|          |                                      |      |        |        |        |        |         |        |         |         |         |
|----------|--------------------------------------|------|--------|--------|--------|--------|---------|--------|---------|---------|---------|
| stropurp | <i>Strongylocentrotus purpuratus</i> | M_Ec | 0.4997 | 525.81 | 643.52 | 372.55 | 789.75  | 0.5003 | 494.84  | 1286.92 | 2126.87 |
| astymexi | <i>Astyanax mexicanus</i>            | M_Fs | 0.2708 | 95.96  | 125.53 | 78.15  | 277.94  | 0.7292 | 524.74  | 1353.47 | 2264.62 |
| esoxluci | <i>Esox lucius</i>                   | M_Fs | 0.6063 | 100.67 | 200.1  | 308.39 | 685.81  | 0.3937 | 481.68  | 1373.6  | 2469.66 |
| nothfurz | <i>Nothobranchius furzeri</i>        | M_Fs | 0.5226 | 75.96  | 99.52  | 65.19  | 338.19  | 0.4774 | 490.58  | 1558.25 | 2019.08 |
| autstimn | <i>Austrofundulus limnaeus</i>       | M_Fs | 0.5043 | 79.32  | 107    | 76.54  | 372.66  | 0.4957 | 587.87  | 1571.63 | 2659.11 |
| fundhete | <i>Fundulus heteroclitus</i>         | M_Fs | 0.4311 | 82.56  | 105.97 | 62.47  | 318.01  | 0.5689 | 659.95  | 1670.86 | 2696.49 |
| cyprvari | <i>Cyprinodon variegatus</i>         | M_Fs | 0.4673 | 78.83  | 103.74 | 68.98  | 382.15  | 0.5327 | 733.65  | 1829.45 | 2917.98 |
| danierio | <i>Danio rerio</i>                   | M_Fs | 0.3704 | 80.88  | 114.69 | 99.33  | 454.16  | 0.6296 | 932.95  | 2180.19 | 3294.1  |
| salmsala | <i>Salmo salar</i>                   | M_Fs | 0.6962 | 115.16 | 248.76 | 398.83 | 1364.04 | 0.3038 | 1012.6  | 2858.56 | 5003.85 |
| hydrvulg | <i>Hydra vulgaris</i>                | M_Cn | 0.5957 | 84.4   | 176.3  | 295.64 | 1412.49 | 0.4043 | 2258.15 | 3957.43 | 4675.29 |

(C) Arthropod two components

| SpecID   | Species                           | TaxonID | a1     | mode1  | median1 | width1 | boder1 | a2     | mode2  | median2 | width2  |
|----------|-----------------------------------|---------|--------|--------|---------|--------|--------|--------|--------|---------|---------|
| sarcscab | <i>Sarcoptes scabiei</i>          | M_Ar    | 0.6095 | 60.47  | 66.1    | 16.8   | 76.87  | 0.3905 | 42.96  | 104.82  | 171.02  |
| priaserr | <i>Priacma serrata</i>            | M_In    | 0.6885 | 53.74  | 55.1    | 5.34   | 63.78  | 0.3115 | 63.38  | 129.36  | 199.89  |
| ramavari | <i>Ramazzottius varieornatus</i>  | M_Ar    | 0.6189 | 67.19  | 74.6    | 21.62  | 109.47 | 0.3811 | 122.7  | 206.27  | 219.2   |
| daphpule | <i>Daphnia pulex</i>              | M_Ar    | 0.6202 | 64.18  | 68.72   | 13.99  | 86.85  | 0.3798 | 75.11  | 211     | 383.72  |
| pedihuma | <i>Pediculus humanus</i>          | M_In    | 0.6111 | 79.09  | 84.6    | 17.89  | 105.11 | 0.3889 | 92.8   | 228.8   | 368.83  |
| belganta | <i>Belgica antarctica</i>         | M_In    | 0.519  | 55.7   | 57.73   | 7.31   | 68.16  | 0.481  | 88.72  | 236.73  | 410.83  |
| tetrurti | <i>Tetranychus urticae</i>        | M_Ar    | 0.4305 | 68.26  | 75.1    | 21.27  | 91.02  | 0.5695 | 80.22  | 247.71  | 513.53  |
| franocci | <i>Frankliniella occidentalis</i> | M_In    | 0.7284 | 81.17  | 86.01   | 16.01  | 113.29 | 0.2716 | 100.14 | 275.89  | 499.86  |
| nasogira | <i>Nasonia giraulti</i>           | M_In    | 0.5753 | 75.49  | 78.73   | 12.9   | 94.85  | 0.4247 | 104.23 | 281.29  | 488.39  |
| megascal | <i>Megaselia scalaris</i>         | M_In    | 0.288  | 54.82  | 56.94   | 8.46   | 61.29  | 0.712  | 53.95  | 318.88  | 1003.85 |
| strimari | <i>Strigamia maritima</i>         | M_In    | 0.6836 | 60.23  | 63.49   | 11.36  | 86.58  | 0.3164 | 116.42 | 321.38  | 566.07  |
| mayedest | <i>Mayetiola destructor</i>       | M_In    | 0.689  | 74.01  | 80.5    | 21.38  | 114.97 | 0.311  | 103.93 | 328.87  | 642.93  |
| chirtent | <i>Chironomus tentans</i>         | M_In    | 0.4701 | 60.41  | 64.65   | 12.19  | 87.32  | 0.5299 | 120.56 | 332.9   | 609.14  |
| nasovitr | <i>Nasonia vitripennis</i>        | M_In    | 0.5244 | 74.56  | 78.16   | 14.32  | 95.47  | 0.4756 | 93.94  | 345.81  | 820.66  |
| drossech | <i>Drosophila sechellia</i>       | M_In    | 0.5358 | 58.48  | 60.94   | 9.02   | 75.35  | 0.4642 | 91.99  | 350.19  | 825.17  |
| dendpond | <i>Dendroctonus ponderosae</i>    | M_In    | 0.4932 | 54.18  | 56.08   | 7.06   | 66.53  | 0.5068 | 80.11  | 352.36  | 912.98  |
| danaxlep | <i>Danaus plexippus</i>           | M_In    | 0.1735 | 72.99  | 77.83   | 14.46  | 90.11  | 0.8265 | 160.32 | 354.78  | 520.82  |
| papixuth | <i>Papilio xuthus</i>             | M_In    | 0.108  | 76.35  | 80.23   | 13.12  | 88.87  | 0.892  | 150.58 | 364.88  | 602.66  |
| drossimu | <i>Drosophila simulans</i>        | M_In    | 0.542  | 58.48  | 60.94   | 9.02   | 75.74  | 0.458  | 93.68  | 373.1   | 902.11  |
| linehumi | <i>Linepithema humile</i>         | M_In    | 0.2693 | 76.44  | 83.2    | 20.88  | 97.33  | 0.7307 | 107.48 | 375.12  | 885.09  |
| papimach | <i>Papilio machaon</i>            | M_In    | 0.1047 | 76.37  | 80.94   | 14.19  | 89.02  | 0.8953 | 151.9  | 377.51  | 634.74  |
| bombimpa | <i>Bombus impatiens</i>           | M_In    | 0.4569 | 75.3   | 79.95   | 18.07  | 101.77 | 0.5431 | 114.33 | 382.95  | 851.33  |
| fopiaris | <i>Fopius arisanus</i>            | M_In    | 0.2999 | 71.35  | 76.85   | 21.88  | 100.1  | 0.7001 | 125.1  | 394.86  | 881.89  |
| wasmauro | <i>Wasmania auripunctata</i>      | M_In    | 0.2528 | 81.34  | 87.11   | 20.55  | 101.49 | 0.7472 | 122.37 | 401.09  | 883.32  |
| pogobarb | <i>Pogonomymex barbatus</i>       | M_In    | 0.2975 | 76.91  | 85.23   | 24.99  | 105.3  | 0.7025 | 119.78 | 402.45  | 900.7   |
| vollmer  | <i>Vollenhovia emeryi</i>         | M_In    | 0.269  | 76.55  | 82.18   | 19.8   | 97.44  | 0.731  | 114.79 | 404.57  | 951.55  |
| orusabie | <i>Orussus abietinus</i>          | M_In    | 0.4716 | 74.27  | 82.27   | 24.84  | 114.25 | 0.5284 | 118.03 | 414.01  | 964.16  |
| attaceph | <i>Atta cephalotes</i>            | M_In    | 0.2945 | 76.67  | 83.42   | 22.18  | 103.37 | 0.7055 | 125.59 | 426.02  | 956.62  |
| harsalt  | <i>Harpegnathos saltator</i>      | M_In    | 0.3118 | 79.99  | 91.82   | 32.73  | 115.8  | 0.6882 | 118.68 | 428.3   | 1025.8  |
| campflor | <i>Camponotus floridanus</i>      | M_In    | 0.2765 | 78.27  | 86.42   | 24.46  | 105.75 | 0.7235 | 121.67 | 429.59  | 1009.72 |
| cerabiro | <i>Cerapachys biroi</i>           | M_In    | 0.3689 | 78.85  | 92.39   | 36.18  | 122.71 | 0.6311 | 114.56 | 432.29  | 1066.15 |
| droserec | <i>Drosophila erecta</i>          | M_In    | 0.5258 | 58.4   | 61.04   | 9.47   | 78.63  | 0.4742 | 104.28 | 438.36  | 1133.3  |
| dufonova | <i>Dufourea novaengliae</i>       | M_In    | 0.4649 | 74.7   | 78.95   | 16.9   | 102.22 | 0.5351 | 127.42 | 438.49  | 979.06  |
| atharosa | <i>Athalia rosae</i>              | M_In    | 0.5741 | 77.91  | 86.21   | 26.72  | 127.51 | 0.4259 | 130.34 | 446.23  | 992.57  |
| spodfrug | <i>Spodoptera frugiperda</i>      | M_In    | 0.1343 | 80.74  | 84.77   | 13.49  | 96.18  | 0.8657 | 194.12 | 448.74  | 686.18  |
| drosyaku | <i>Drosophila yakuba</i>          | M_In    | 0.5267 | 58.42  | 61.19   | 9.7    | 79.77  | 0.4733 | 105.39 | 458.25  | 1218.31 |
| policana | <i>Polistes canadensis</i>        | M_In    | 0.476  | 79.37  | 85.76   | 22.46  | 113.63 | 0.524  | 114.39 | 458.65  | 1192.53 |
| drosersp | <i>Drosophila persimilis</i>      | M_In    | 0.6243 | 60.69  | 63.73   | 11.08  | 83.39  | 0.3757 | 90.47  | 462     | 1278.9  |
| monophar | <i>Monomorium pharaonis</i>       | M_In    | 0.261  | 77.47  | 83.95   | 21.56  | 103.31 | 0.739  | 131.88 | 464.62  | 1078.21 |
| drosgrim | <i>Drosophila grimshawi</i>       | M_In    | 0.5535 | 61.29  | 65.32   | 12.85  | 91.38  | 0.4465 | 129.29 | 474.02  | 1056.57 |
| megarotu | <i>Megachile rotundata</i>        | M_In    | 0.4561 | 71.27  | 76.1    | 18.09  | 100.94 | 0.5438 | 115.27 | 474.56  | 1250.26 |
| helimelp | <i>Heliconius melpomene</i>       | M_In    | 0.068  | 79.12  | 83.49   | 14.67  | 87.72  | 0.932  | 215.64 | 476.04  | 687.99  |
| papipoly | <i>Papilio polytes</i>            | M_In    | 0.4462 | 71.58  | 192.18  | 624.27 | 340.37 | 0.5538 | 303.49 | 483.62  | 481.43  |
| bombterr | <i>Bombus terrestris</i>          | M_In    | 0.4481 | 75.15  | 80.69   | 19.57  | 107.68 | 0.5519 | 131.84 | 483.84  | 1125    |
| dinoquad | <i>Dinoponera quadricaps</i>      | M_In    | 0.272  | 79.18  | 87.17   | 26.7   | 110.4  | 0.728  | 138.96 | 489.9   | 1124.17 |
| cephcinc | <i>Cephus cinctus</i>             | M_In    | 0.549  | 73.36  | 79.74   | 21.75  | 116.1  | 0.451  | 135.74 | 493.27  | 1145.52 |
| polidomi | <i>Polistes dominula</i>          | M_In    | 0.4774 | 79.64  | 85.61   | 21.67  | 113.63 | 0.5226 | 117.7  | 496.23  | 1332.29 |
| soleinvi | <i>Solenopsis invicta</i>         | M_In    | 0.2699 | 77.44  | 84.59   | 22.61  | 104.43 | 0.7301 | 129.22 | 498.31  | 1220.46 |
| copiflor | <i>Copidosoma floridanum</i>      | M_In    | 0.5211 | 74.68  | 78.8    | 16.37  | 101.8  | 0.4789 | 103.31 | 500.32  | 1495.69 |
| tricpret | <i>Trichogramma pretiosum</i>     | M_In    | 0.5764 | 72.06  | 75.81   | 14.89  | 102.2  | 0.4236 | 132.44 | 509.32  | 1221.52 |
| acroechi | <i>Acromyrmex echinator</i>       | M_In    | 0.2613 | 77.01  | 83.94   | 22.53  | 104.1  | 0.7387 | 131.28 | 510.1   | 1264.36 |
| apisflor | <i>Apis florea</i>                | M_In    | 0.4666 | 74.78  | 82.94   | 25.04  | 118.08 | 0.5334 | 126.7  | 512.08  | 1297.87 |
| cotevest | <i>Cotesia vestalis</i>           | M_In    | 0.4537 | 72.42  | 79.61   | 22.84  | 117.55 | 0.5463 | 192.1  | 513     | 878.67  |
| plutxylo | <i>Plutella xylostella</i>        | M_In    | 0.2228 | 358.97 | 397.34  | 152.64 | 258.63 | 0.7772 | 155.73 | 514.91  | 1055.71 |
| drosanan | <i>Drosophila ananassae</i>       | M_In    | 0.5649 | 57.75  | 60.04   | 8.42   | 77.02  | 0.4351 | 104.06 | 519.34  | 1489.08 |
| apisdors | <i>Apis dorsata</i>               | M_In    | 0.4545 | 75.01  | 83.83   | 26.43  | 121.59 | 0.5455 | 134.25 | 548.58  | 1386.15 |
| mandsxt  | <i>Manduca sexta</i>              | M_In    | 0.0954 | 75.59  | 81.3    | 16.49  | 99.87  | 0.9046 | 241.61 | 552.21  | 834.8   |
| apismell | <i>Apis mellifera</i>             | M_In    | 0.4715 | 74.94  | 84.71   | 28.34  | 122.21 | 0.5285 | 139.51 | 552.57  | 1355.92 |
| neodleco | <i>Neodiprion lecontei</i>        | M_In    | 0.4689 | 82.31  | 98.18   | 43.76  | 158.72 | 0.5311 | 173.87 | 552.7   | 1131.33 |
| droswill | <i>Drosophila willstoni</i>       | M_In    | 0.6153 | 61.33  | 64.4    | 10.92  | 86.93  | 0.3847 | 110.89 | 565.57  | 1599.47 |
| culequin | <i>Culex quinquefasciatus</i>     | M_In    | 0.4181 | 58.93  | 61.25   | 8.4    | 71.55  | 0.5819 | 71.94  | 574.01  | 2058.18 |
| drosmela | <i>Drosophila melanogaster</i>    | M_In    | 0.4688 | 58.65  | 61.61   | 10.2   | 82.29  | 0.5312 | 115.96 | 580.12  | 1726.92 |
| metaooci | <i>Metaseiulus occidentalis</i>   | M_Ar    | 0.6952 | 99.68  | 116.32  | 47.62  | 208.78 | 0.3048 | 194.52 | 587.85  | 1115.93 |
| cerasolm | <i>Ceratosenes solmsi</i>         | M_In    | 0.2595 | 74.97  | 80.35   | 19.74  | 104.76 | 0.7405 | 176.15 | 591.77  | 1264.08 |
| tribcast | <i>Tribolium castaneum</i>        | M_In    | 0.5518 | 47.55  | 48.99   | 5.72   | 60.97  | 0.4482 | 90.51  | 633.62  | 2193.08 |
| amyetran | <i>Amyelois transitella</i>       | M_In    | 0.0408 | 80.89  | 85.3    | 14.9   | 98.54  | 0.9592 | 261.34 | 640.27  | 1043.79 |
| chilsupp | <i>Chilo suppressalis</i>         | M_In    | 0.2203 | 77.34  | 91.12   | 36.49  | 138.2  | 0.7796 | 344.68 | 642.76  | 790.93  |
| drospsue | <i>Drosophila pseudoobscura</i>   | M_In    | 0.6258 | 60.45  | 63.97   | 11.92  | 92.01  | 0.3742 | 131.12 | 656.76  | 1808.73 |
| melicinx | <i>Melitta cinxia</i>             | M_In    | 0.0872 | 77.18  | 84.33   | 19.99  | 85.49  | 0.9128 | 218.85 | 659.01  | 1195.21 |
| drosviri | <i>Drosophila virilis</i>         | M_In    | 0.5603 | 59.47  | 62.84   | 11.05  | 89     | 0.4397 | 142.87 | 665.76  | 1745.57 |
| micrdemo | <i>Microplitis demolitor</i>      | M_In    | 0.4521 | 70.94  | 78.56   | 22.81  | 125.13 | 0.5478 | 201.08 | 671.2   | 1402.5  |
| onthtaur | <i>Onthophagus taurus</i>         | M_In    | 0.4938 | 52.94  | 55.65   | 8.26   | 75.06  | 0.5062 | 92.25  | 683.3   | 2671.86 |
| drosmira | <i>Drosophila miranda</i>         | M_In    | 0.6889 | 60.68  | 63.9    | 11.31  | 95.13  | 0.3111 | 153.76 | 687.13  | 1775.4  |
| diapictr | <i>Diaphorina citri</i>           | M_In    | 0.2604 | 383.95 | 451.43  | 229.97 | 342.84 | 0.7396 | 196.08 | 697.94  | 1467.73 |
| drosmoja | <i>Drosophila mojavensis</i>      | M_In    | 0.5843 | 59.93  | 64.19   | 12.89  | 98.37  | 0.4157 | 155.11 | 715.52  | 1845.12 |
| lepesalm | <i>Lepeophtheirus salmon</i>      |         |        |        |         |        |        |        |        |         |         |



|          |                                  |      |        |       |        |         |         |        |         |         |         |
|----------|----------------------------------|------|--------|-------|--------|---------|---------|--------|---------|---------|---------|
| acyprips | <i>Acyrtosiphon pisum</i>        | M_In | 0.5311 | 64.74 | 76.7   | 31.49   | 180.89  | 0.4689 | 315.1   | 931.6   | 1722.94 |
| diacallo | <i>Diachasma alloeum</i>         | M_In | 0.2563 | 74.58 | 84.62  | 30.34   | 135.59  | 0.7437 | 310.24  | 946.3   | 1804.11 |
| diurnoxi | <i>Diuraphis noxia</i>           | M_In | 0.5601 | 64.34 | 75.3   | 28.9    | 180.51  | 0.4399 | 307.79  | 977.91  | 1920.62 |
| anopdari | <i>Anopheles darlingi</i>        | M_In | 0.6566 | 69.44 | 76.99  | 21.48   | 147.74  | 0.3434 | 480.8   | 996.54  | 1367.17 |
| glosmors | <i>Glossina morsitans</i>        | M_In | 0.6479 | 60.04 | 66.1   | 17.17   | 132.22  | 0.3521 | 277.42  | 1017.35 | 2182.48 |
| bactdors | <i>Bactrocera dorsalis</i>       | M_In | 0.5683 | 60.5  | 66.79  | 17.44   | 118.86  | 0.4317 | 165.99  | 1060.69 | 3342.35 |
| bactcucu | <i>Bactrocera cucurbitae</i>     | M_In | 0.5282 | 60.7  | 66.84  | 17.1    | 115.72  | 0.4718 | 163.47  | 1072.42 | 3501.04 |
| bactolea | <i>Bactrocera oleae</i>          | M_In | 0.5486 | 60.77 | 68.04  | 19.85   | 132.12  | 0.4514 | 224.1   | 1118.48 | 2969.95 |
| aedeaeay | <i>Aedes aegypti</i>             | M_In | 0.4123 | 60.84 | 62.96  | 8.44    | 74.79   | 0.5877 | 69.7    | 1207.28 | 6731.77 |
| cimelect | <i>Cimex lectularius</i>         | M_In | 0.571  | 58.88 | 64.82  | 16.06   | 127.41  | 0.429  | 224.08  | 1393.92 | 4221.73 |
| ixodscap | <i>Ixodes scapularis</i>         | M_Ar | 0.1126 | 69.71 | 94.78  | 65.83   | 189.54  | 0.8874 | 814.02  | 1826.52 | 2658.42 |
| halyhaly | <i>Halyomorpha halys</i>         | M_In | 0.2345 | 74.94 | 91.44  | 44.28   | 233.73  | 0.7655 | 632.88  | 1895.33 | 3531.19 |
| ceracapi | <i>Ceratitis capitata</i>        | M_In | 0.5539 | 61.32 | 71.45  | 26.66   | 187.45  | 0.4461 | 361.54  | 1939.65 | 5245.5  |
| muscdome | <i>Musca domestica</i>           | M_In | 0.5412 | 59.91 | 66.18  | 16.74   | 136.81  | 0.4588 | 346.22  | 2033.45 | 5614.78 |
| homavitr | <i>Homalodisca vitripennis</i>   | M_In | 0.0626 | 96.63 | 154.3  | 165.98  | 259.54  | 0.9374 | 837.07  | 2178.67 | 3617.16 |
| paratepi | <i>Parasteatoda tepidariorum</i> | M_Ar | 0.0941 | 79.81 | 98.59  | 50.73   | 269.81  | 0.9059 | 1049.88 | 2215.94 | 3068.13 |
| oncofasc | <i>Oncopeltus fasciatus</i>      | M_In | 0.1878 | 74.24 | 134.85 | 239.34  | 487.87  | 0.8122 | 1109.15 | 2249.43 | 2991.04 |
| blatgerm | <i>Blattella germanica</i>       | M_In | 0.176  | 85.45 | 191.26 | 407.02  | 483.46  | 0.824  | 939.46  | 2324.89 | 3688.43 |
| leptdece | <i>Lepidoptera decemlineata</i>  | M_In | 0.3434 | 51.63 | 85.61  | 147.02  | 577.49  | 0.6566 | 1086.3  | 3302.3  | 6039.06 |
| limupoly | <i>Limulus polyphemus</i>        | M_Ar | 0.437  | 369.2 | 812.64 | 1171.05 | 1629.63 | 0.563  | 1703.19 | 3314.67 | 4227.07 |
| phlepapa | <i>Phlebotomus papatasi</i>      | M_In | 0.6868 | 59.94 | 74.38  | 40.52   | 664.69  | 0.3132 | 2441.82 | 3755.62 | 3921.31 |
| stegmimo | <i>Stegodyphus mimosarum</i>     | M_Ar | 0.1656 | 85.25 | 157    | 265.01  | 752.72  | 0.8344 | 2411.16 | 4560.54 | 5688.77 |
| stomcalc | <i>Stomoxys calcitrans</i>       | M_In | 0.5528 | 59.12 | 72.36  | 35.74   | 412.41  | 0.4472 | 1698.95 | 5877.76 | 11608.2 |

(D) Miscellaneous metazoan two components

| SpeclD    | Species                              | TaxonID | a1     | mode1  | median1 | width1 | boder1 | a2     | mode2  | median2 | width2  |
|-----------|--------------------------------------|---------|--------|--------|---------|--------|--------|--------|--------|---------|---------|
| triacadha | <i>Trichoplax adhaerens</i>          | M_Pi    | 0.0179 | 50.14  | 57.79   | 28.61  | 65.53  | 0.9821 | 84.86  | 137.12  | 148.12  |
| syphmuri  | <i>Syphacia muris</i>                | M_Ne    | 0.0848 | 55.02  | 112.93  | 152.3  | 217.42 | 0.9152 | 85.1   | 137.38  | 137.94  |
| tricspir  | <i>Trichinella spiralis</i>          | M_Ne    | 0.3251 | 59.14  | 62.61   | 13.5   | 65.25  | 0.6749 | 63.11  | 141.33  | 207.34  |
| cylicgold | <i>Cylicostephanus goldi</i>         | M_Ne    | 0.5982 | 50.39  | 53.41   | 9.32   | 66.58  | 0.4018 | 79.31  | 153.18  | 193.79  |
| prispaci  | <i>Pristionchus pacificus</i>        | M_Ne    | 0.1543 | 44.37  | 45.53   | 4.6    | 48.03  | 0.8457 | 78.69  | 153.68  | 197.9   |
| globpall  | <i>Globodera pallida</i>             | M_Ne    | 0.3734 | 50.03  | 52.92   | 11.48  | 64.86  | 0.6266 | 89.14  | 156.8   | 177.58  |
| prisexsp  | <i>Pristionchus exspectatus</i>      | M_Ne    | 0.2049 | 43.76  | 47.61   | 10.11  | 54.56  | 0.7951 | 89.55  | 164.84  | 197.52  |
| stropapi  | <i>Strongyloides papillosus</i>      | M_Ne    | 0.7177 | 42.95  | 45.25   | 9.13   | 60.98  | 0.2823 | 66     | 166.97  | 282.37  |
| melofoir  | <i>Meloidogyne floridensis</i>       | M_Ne    | 0.3418 | 43.13  | 44.89   | 7.02   | 50.92  | 0.6582 | 100.34 | 174.63  | 203.44  |
| strovene  | <i>Strongyloides venezuelensis</i>   | M_Ne    | 0.6513 | 42.89  | 45.21   | 9.22   | 60.06  | 0.3487 | 65.1   | 183.45  | 350.34  |
| hetebact  | <i>Heterorhabditis bacteriophora</i> | M_Ne    | 0.2168 | 58.75  | 68.95   | 27.35  | 67.85  | 0.7832 | 75.31  | 185.51  | 295.19  |
| meloahl   | <i>Meloidogyne hapla</i>             | M_Ne    | 0.5328 | 43.27  | 44.98   | 6.8    | 57.68  | 0.4672 | 116.41 | 191.64  | 202.13  |
| strovulg  | <i>Strongylus vulgaris</i>           | M_Ne    | 0.5243 | 53.02  | 57.63   | 12.91  | 75.31  | 0.4757 | 91.68  | 201.09  | 288.45  |
| amphquee  | <i>Amphimedon queenslandica</i>      | M_Po    | 0.4798 | 47.7   | 51.97   | 12.22  | 70.07  | 0.5202 | 92.76  | 204.28  | 297.21  |
| steiscap  | <i>Steinernema scapterisci</i>       | M_Ne    | 0.6897 | 44.56  | 45.75   | 4.74   | 56.69  | 0.3103 | 92.88  | 205.76  | 303.12  |
| tricnati  | <i>Trichinella nativa</i>            | M_Ne    | 0.6307 | 59.08  | 64.66   | 17.98  | 92.87  | 0.3693 | 113.86 | 208.62  | 248.72  |
| steifelt  | <i>Steinernema feltiae</i>           | M_Ne    | 0.691  | 44.37  | 45.6    | 4.89   | 56.56  | 0.309  | 96.02  | 214.03  | 314.2   |
| trictic   | <i>Trichuris trichiura</i>           | M_Ne    | 0.6379 | 51.37  | 53.4    | 8.06   | 64.67  | 0.3621 | 62.88  | 218.39  | 457.2   |
| steiglas  | <i>Steinernema glaseri</i>           | M_Ne    | 0.5306 | 43.67  | 44.84   | 4.66   | 53.98  | 0.4694 | 98.36  | 221.15  | 328.62  |
| steimont  | <i>Steinernema monticolum</i>        | M_Ne    | 0.674  | 44.49  | 45.79   | 5.17   | 57.73  | 0.326  | 102.66 | 221.53  | 315.63  |
| caenrema  | <i>Caenorhabditis remanei</i>        | M_Ne    | 0.5677 | 46.2   | 47.6    | 5.5    | 56.73  | 0.4323 | 80.05  | 222.45  | 400.58  |
| thelcall  | <i>Thelazia callipaeda</i>           | M_Ne    | 0.1678 | 77.68  | 104.78  | 71.77  | 103.64 | 0.8321 | 156.47 | 225.3   | 197.27  |
| enteverm  | <i>Enterobius vermicularis</i>       | M_Ne    | 0.4765 | 82.01  | 117.38  | 92.81  | 150.38 | 0.5235 | 121.24 | 226.11  | 276.06  |
| caenbren  | <i>Caenorhabditis brenneri</i>       | M_Ne    | 0.5371 | 45.93  | 47.29   | 5.16   | 57.1   | 0.4629 | 93.31  | 228.02  | 369.28  |
| litosigm  | <i>Litomosoides sigmodontis</i>      | M_Ne    | 0.1708 | 82.58  | 93.27   | 34.05  | 107.71 | 0.8292 | 165.24 | 228.12  | 176.63  |
| brugtimo  | <i>Brugia timori</i>                 | M_Ne    | 0.1565 | 80.74  | 108.58  | 73.58  | 107.02 | 0.8435 | 171.14 | 236.25  | 195.87  |
| strostre  | <i>Strongyloides stercoralis</i>     | M_Ne    | 0.753  | 44.47  | 47.72   | 11.56  | 73.07  | 0.247  | 85.48  | 241.35  | 447.28  |
| anisimp   | <i>Anisakis simplex</i>              | M_Ne    | 0.1513 | 67.15  | 102.42  | 94.12  | 106.61 | 0.8487 | 160.81 | 241.6   | 220.8   |
| onchflex  | <i>Onchocerca flexuosa</i>           | M_Ne    | 0.1407 | 85.42  | 104.52  | 51.13  | 102.52 | 0.8593 | 174.12 | 243.3   | 207.52  |
| brugpaha  | <i>Brugia pahangi</i>                | M_Ne    | 0.1694 | 83.65  | 115.88  | 85.19  | 113.04 | 0.8306 | 171.76 | 243.65  | 210.02  |
| wuchbanc  | <i>Wuchereria bancrofti</i>          | M_Ne    | 0.1488 | 84.16  | 109.45  | 66.34  | 109.51 | 0.8512 | 179    | 247.97  | 205.96  |
| brugmala  | <i>Brugia malayi</i>                 | M_Ne    | 0.3564 | 88.39  | 146.13  | 158.21 | 170.49 | 0.6436 | 190.54 | 253.62  | 193.09  |
| elaeelep  | <i>Elaeophora elaphi</i>             | M_Ne    | 0.1338 | 85.63  | 110.49  | 65.21  | 106.89 | 0.8662 | 181.82 | 258     | 224.2   |
| acanvite  | <i>Acanthocheilonema viteae</i>      | M_Ne    | 0.3617 | 87.98  | 144.25  | 153.86 | 175.87 | 0.6383 | 197.39 | 261.66  | 194.92  |
| loa_loa_  | <i>Loa loa</i>                       | M_Ne    | 0.2253 | 86.44  | 132.39  | 124.93 | 137.15 | 0.7747 | 189.48 | 262.69  | 218.81  |
| paratric  | <i>Parastrongyloides trichosuri</i>  | M_Ne    | 0.7201 | 42.2   | 44.66   | 8.62   | 67.48  | 0.2799 | 112.63 | 264.22  | 408.06  |
| steicarp  | <i>Steinernema carpocapsae</i>       | M_Ne    | 0.6893 | 44.3   | 45.45   | 4.55   | 56.14  | 0.3107 | 101.6  | 267.41  | 455.01  |
| stroratt  | <i>Strongyloides ratti</i>           | M_Ne    | 0.7687 | 43.93  | 48.02   | 12.41  | 84.1   | 0.2313 | 106.99 | 271.2   | 456.44  |
| dracmedi  | <i>Dracunculus medinensis</i>        | M_Ne    | 0.299  | 83.35  | 115.38  | 84.02  | 132.94 | 0.701  | 161.91 | 276.66  | 307.93  |
| dioimmi   | <i>Diriofilaria immitis</i>          | M_Ne    | 0.5615 | 101.32 | 181.97  | 218.62 | 258.16 | 0.4385 | 233.86 | 278.41  | 177.18  |
| onchvolv  | <i>Onchocerca volvulus</i>           | M_Ne    | 0.3869 | 97.6   | 185     | 246.42 | 205.59 | 0.6131 | 211.93 | 286.04  | 230.19  |
| rhabkr30  | <i>Rhabditophanes kr3021</i>         | M_Ne    | 0.6016 | 41.81  | 43.3    | 5.91   | 55.83  | 0.3984 | 101.21 | 286.72  | 519.76  |
| capitele  | <i>Capitella teleta</i>              | M_An    | 0.5404 | 51.98  | 53.76   | 6.92   | 65.41  | 0.4596 | 96.01  | 288.4   | 553.68  |
| helorobu  | <i>Helobdella robusta</i>            | M_An    | 0.8425 | 111.58 | 239.36  | 349.12 | 681.17 | 0.1575 | 228.91 | 298.26  | 229.6   |
| onchoche  | <i>Onchocerca ochengi</i>            | M_Ne    | 0.2881 | 93.8   | 122.36  | 76.93  | 165.56 | 0.7119 | 220.82 | 302.1   | 229.48  |
| meloenco  | <i>Meloidogyne incognita</i>         | M_Ne    | 0.5216 | 42.4   | 46.02   | 9.47   | 95.83  | 0.4784 | 199.6  | 302.9   | 283.43  |
| caenbrig  | <i>Caenorhabditis briggsae</i>       | M_Ne    | 0.5297 | 45.49  | 47.16   | 5.63   | 59.17  | 0.4703 | 135.84 | 329.93  | 513.88  |
| caeneleg  | <i>Caenorhabditis elegans</i>        | M_Ne    | 0.525  | 45.87  | 48.63   | 7.96   | 72.71  | 0.475  | 156.35 | 339.27  | 482.93  |
| ancyduod  | <i>Ancylostoma duodenale</i>         | M_Ne    | 0.4821 | 56.65  | 66.45   | 25.73  | 109.87 | 0.5179 | 165.44 | 351.88  | 489.47  |
| tricmuri  | <i>Trichuris muris</i>               | M_Ne    | 0.6456 | 52.06  | 54.02   | 7.79   | 70.61  | 0.3544 | 102.99 | 379.76  | 871.51  |
| tricsuis  | <i>Trichuris suis</i>                | M_Ne    | 0.5803 | 51.52  | 53.48   | 7.79   | 67.22  | 0.4197 | 103.56 | 387.46  | 843.22  |
| haemplac  | <i>Haemonchus placei</i>             | M_Ne    | 0.5051 | 56.77  | 70.35   | 36.4   | 146.71 | 0.4949 | 231.96 | 474.61  | 639.56  |
| dictvivi  | <i>Dictyoctonus viviparus</i>        | M_Ne    | 0.5831 | 58.65  | 86.6    | 80.06  | 251.68 | 0.4169 | 271.23 | 543.76  | 714.76  |
| crasgiga  | <i>Crassostrea gigas</i>             | M_Mo    | 0.2751 | 99.1   | 157.28  | 170.15 | 210.52 | 0.7249 | 229.93 | 559.9   | 903.73  |
| lottgiga  | <i>Lottia gigantea</i>               | M_Mo    | 0.5211 | 268.74 | 312.12  | 170.54 | 379.71 | 0.4789 | 240.34 | 566.36  | 864.16  |
| ancygani  | <i>Ancylostoma caninum</i>           | M_Ne    | 0.6705 | 56.17  | 70.13   | 38.14  | 220.42 | 0.3295 | 362    | 570.36  | 607.87  |
| haemcont  | <i>Haemonchus contortus</i>          | M_Ne    | 0.4027 | 56.15  | 73.77   | 50.31  | 159.02 | 0.5973 | 232.22 | 580.04  | 923.47  |
| paraequo  | <i>Parascaris equorum</i>            | M_Ne    | 0.1514 | 41.38  | 90.85   | 132.88 | 182.23 | 0.8486 | 409.89 | 603.99  | 560.63  |
| oesodent  | <i>Oesophagostomum dentatum</i>      | M_Ne    | 0.7005 | 53.85  | 63.41   | 25.22  | 176.27 | 0.2995 | 297.19 | 605.17  | 812.36  |
| angicant  | <i>Angiostrongylus cantonensis</i>   | M_Ne    | 0.4893 | 59.68  | 78.26   | 49.62  | 174.35 | 0.5107 | 289.21 | 622.64  | 878.08  |
| angicoat  | <i>Angiostrongylus costaricensis</i> | M_Ne    | 0.4776 | 59.71  | 78.07   | 48.86  | 170.63 | 0.5224 | 292.69 | 640.72  | 915.71  |
| gongpulp  | <i>Gongylonema pulchrum</i>          | M_Ne    | 0.2235 | 83.38  | 118.83  | 92.98  | 200.24 | 0.7765 | 443.58 | 649.57  | 612.72  |
| nippbras  | <i>Nippostrongylus brasiliensis</i>  | M_Ne    | 0.5773 | 56.75  | 72.37   | 42.92  | 221.47 | 0.4227 | 400.77 | 666.85  | 742.77  |
| necaamer  | <i>Necator americanus</i>            | M_Ne    | 0.5454 | 56.91  | 71.06   | 37.87  | 186.33 | 0.4546 | 303.31 | 697.25  | 1034.93 |
| ascalumb  | <i>Ascaris lumbricoides</i>          | M_Ne    | 0.0192 | 64.95  | 93.17   | 82.98  | 114.5  | 0.9808 | 471.79 | 715.7   | 682.45  |
| toxocani  | <i>Toxocara canis</i>                | M_Ne    | 0.0348 | 99.65  | 128.47  | 114.65 | 194.84 | 0.9652 | 525.89 | 742.58  | 615.35  |
| heliopoly | <i>Heligmosomoides polygyrus</i>     | M_Ne    | 0.5073 | 56.32  | 64.81   | 22.29  | 121.8  | 0.4927 | 289.1  | 814.7   | 1386.4  |
| ancyceyl  | <i>Ancylostoma ceylanicum</i>        | M_Ne    | 0.6073 | 56.07  | 71.2    | 42.26  | 252.92 | 0.3927 | 377.42 | 833.94  | 1199.54 |
| ascasuum  | <i>Ascaris suum</i>                  | M_Ne    | 0.4537 | 514.43 | 633.86  | 435.52 | 671.14 | 0.5463 | 493.77 | 852.83  | 959.47  |
| biomglab  | <i>Biomphalaria glabrata</i>         | M_Mo    | 0.1417 | 101.2  | 132.62  | 85.38  | 200.33 | 0.8583 | 375.82 | 891.16  | 1390.54 |

</

|           |                                  |      |        |        |        |        |         |        |         |         |         |
|-----------|----------------------------------|------|--------|--------|--------|--------|---------|--------|---------|---------|---------|
| telacirc  | <i>Teladorsagia circumcincta</i> | M_Ne | 0.4415 | 55.73  | 73.17  | 50.42  | 224.27  | 0.5585 | 390.24  | 1040.82 | 1737.95 |
| sobobatu  | <i>Soboliphyme baturini</i>      | M_Ne | 0.4955 | 51.21  | 57.14  | 16.41  | 102.06  | 0.5045 | 620.39  | 1185.89 | 1551.54 |
| aplycali  | <i>Aplysia californica</i>       | M_Mo | 0.0132 | 96.7   | 284.22 | 530.77 | 254.61  | 0.9868 | 583.77  | 1215.15 | 1694.8  |
| mnemleid  | <i>Mnemiopsis leidyi</i>         | M_Ct | 0.6765 | 149.91 | 204.18 | 143.82 | 511.32  | 0.3235 | 563.79  | 1216.73 | 1713.35 |
| schioura  | <i>Schistosoma curassoni</i>     | M_Pi | 0.2777 | 32.21  | 43.63  | 36.75  | 221.97  | 0.7223 | 942     | 1400.68 | 1393.37 |
| schimarg  | <i>Schistosoma margrebowiei</i>  | M_Pi | 0.2603 | 32.48  | 51.48  | 68.42  | 250.31  | 0.7397 | 880.94  | 1424.38 | 1561.96 |
| faschepa  | <i>Fasciola hepatica</i>         | M_Pi | 0.2686 | 34.57  | 40.05  | 14.41  | 91.04   | 0.7314 | 423.14  | 1438.88 | 2863.22 |
| schimatt  | <i>Schistosoma mattheei</i>      | M_Pi | 0.2688 | 32.98  | 52.47  | 67.2   | 301.5   | 0.7312 | 1003.39 | 1449.81 | 1382.65 |
| schirodh  | <i>Schistosoma rodhaini</i>      | M_Pi | 0.317  | 32.27  | 44.08  | 35.72  | 246.28  | 0.683  | 1000.22 | 1464.05 | 1419.86 |
| linganat  | <i>Lingula anatina</i>           | M_Br | 0.7809 | 262.64 | 326.77 | 202.99 | 733.48  | 0.2191 | 761.74  | 1556.1  | 2083.61 |
| schijapa  | <i>Schistosoma japonicum</i>     | M_Pi | 0.2009 | 32.58  | 39.58  | 18.51  | 129.81  | 0.7991 | 947.83  | 1694.41 | 2005.64 |
| octobima  | <i>Octopus bimaculoides</i>      | M_Mo | 0.0233 | 105.01 | 117.26 | 48.72  | 128.75  | 0.9767 | 662.39  | 1827.72 | 3166.11 |
| schimans  | <i>Schistosoma mansoni</i>       | M_Pi | 0.1939 | 32.58  | 38.4   | 15.68  | 145.78  | 0.8061 | 1105.34 | 1938.48 | 2242.05 |
| schiahaem | <i>Schistosoma haematobium</i>   | M_Pi | 0.121  | 33.14  | 44.08  | 31.96  | 187.87  | 0.879  | 1159.39 | 1956.86 | 2171.52 |
| clonsine  | <i>Clonorchis sinensis</i>       | M_Pi | 0.1862 | 39.44  | 126.97 | 333.29 | 455.33  | 0.8138 | 1145.78 | 2124.44 | 2612.77 |
| opisivive | <i>Opisthorchis viverrini</i>    | M_Pi | 0.1832 | 33.79  | 57.18  | 87.76  | 274.84  | 0.8167 | 1081.68 | 2385.78 | 3421.48 |
| priacaud  | <i>Priapulus caudatus</i>        | M_Pr | 0.7752 | 264.03 | 412.83 | 402.24 | 1526.01 | 0.2248 | 1672.73 | 3473.81 | 4724.39 |

#### (E) Fungal two components

| Specid    | Species                              | TaxonID | a1     | mode1 | median1 | width1 | boder1 | a2     | mode2 | median2 | width2 |
|-----------|--------------------------------------|---------|--------|-------|---------|--------|--------|--------|-------|---------|--------|
| rozeallo  | <i>Rozella allomyces</i>             | F_Cr    | 0.0558 | 21.15 | 22.7    | 5.94   | 23.31  | 0.9442 | 26.02 | 28.16   | 12.58  |
| dioscryo  | <i>Dioszegia cryoxerica</i>          | F_Ba    | 0.5254 | 45.69 | 47.29   | 5.73   | 47.87  | 0.4746 | 32.5  | 48.33   | 41.52  |
| malaglob  | <i>Malassezia globosa</i>            | F_Ba    | 0.0031 | 19.75 | 20.04   | 1.11   | 21.24  | 0.9969 | 35.66 | 50.84   | 39.81  |
| lindingo  | <i>Lindgomyces ingoldianus</i>       | F_As    | 0.5282 | 37.22 | 56.96   | 51.85  | 55.06  | 0.4718 | 50.63 | 53.62   | 8.75   |
| mycofiji  | <i>Mycosphaerella fijensis</i>       | F_As    | 0.6273 | 29.87 | 51.86   | 59.83  | 58.97  | 0.3727 | 53.24 | 55.22   | 7.34   |
| taphdefo  | <i>Taphrina deformans</i>            | F_As    | 0.7364 | 46.27 | 47.51   | 4.92   | 51.93  | 0.2636 | 34.32 | 57      | 68.85  |
| aspenovo  | <i>Aspergillus novofumigatus</i>     | F_As    | 0.1999 | 25.93 | 51.3    | 74.67  | 50.23  | 0.8001 | 52.96 | 59.72   | 18.15  |
| pneujiro  | <i>Pneumocystis jirovecii</i>        | F_As    | 0.7934 | 43.24 | 44.49   | 4.97   | 50.63  | 0.2066 | 37.58 | 60.7    | 61.49  |
| septpopu  | <i>Septoria populicola</i>           | F_As    | 0.8512 | 55.1  | 69.76   | 39.74  | 138.36 | 0.1488 | 32.69 | 65.22   | 87.87  |
| choivoeno | <i>Choiromyces venosus</i>           | F_As    | 0.9129 | 55.91 | 66.35   | 27.42  | 139.43 | 0.0871 | 26.48 | 66.01   | 129.72 |
| hetepycn  | <i>Heterogastrium pycnidioideur.</i> | F_Ba    | 0.8982 | 41.77 | 43.1    | 5.28   | 53.35  | 0.1018 | 49.91 | 66.28   | 46.97  |
| chioapob  | <i>Chionosphaera apobasidialis</i>   | F_Ba    | 0.9337 | 47.42 | 48.57   | 4.56   | 58.12  | 0.0663 | 36.7  | 68.11   | 84.14  |
| ramarube  | <i>Ramaria rubella</i>               | F_Ba    | 0.8378 | 52.42 | 54.7    | 8.2    | 65.84  | 0.1622 | 44.92 | 68.44   | 63.09  |
| pedhort   | <i>Piedraia hortae</i>               | F_As    | 0.7376 | 46.98 | 48.74   | 6.24   | 55.48  | 0.2624 | 40.41 | 70.09   | 77.88  |
| gymnandr  | <i>Gymnopus androsaceus</i>          | F_Ba    | 0.7806 | 52.34 | 54.24   | 7.18   | 62.43  | 0.2194 | 39.5  | 73.56   | 89.9   |
| amanmusc  | <i>Amanita muscaria</i>              | F_Ba    | 0.9074 | 50.74 | 52.3    | 6.22   | 63.65  | 0.0926 | 39.32 | 73.68   | 91.53  |
| rhizmicr  | <i>Rhizopus microsporus</i>          | F_Fu    | 0.9265 | 51.53 | 53.84   | 8.23   | 70.99  | 0.0735 | 43    | 74.01   | 81.37  |
| talastip  | <i>Talaromyces stipitatus</i>        | F_As    | 0.6669 | 53.47 | 56.79   | 10.74  | 64.65  | 0.3331 | 42.83 | 74.51   | 83.1   |
| acrealca  | <i>Acremonium alcalophilum</i>       | F_As    | 0.4829 | 33.55 | 53.34   | 53.83  | 67.95  | 0.5171 | 65.57 | 74.68   | 26.67  |
| hanspoly  | <i>Hansenula polymorpha</i>          | F_As    | 0.4141 | 34.08 | 39.49   | 14.4   | 42.6   | 0.5859 | 27.95 | 76.83   | 162.88 |
| rhizsola  | <i>Rhizoctonia solani</i>            | F_Ba    | 0.8942 | 52.15 | 53.89   | 6.77   | 66.11  | 0.1058 | 49.24 | 77.31   | 86.92  |
| conithro  | <i>Conidiobolus thromboides</i>      | F_En    | 0.9229 | 48.51 | 52.19   | 10.64  | 79.39  | 0.0771 | 43.04 | 77.41   | 90.54  |
| pycncinn  | <i>Pycnoporus cinnabarinus</i>       | F_Ba    | 0.7434 | 53.82 | 55.92   | 7.38   | 64.37  | 0.2566 | 51.7  | 77.6    | 73.5   |
| cryptneof | <i>Cryptococcus neoformans</i>       | F_Ba    | 0.7648 | 51.81 | 54.45   | 8.83   | 65.36  | 0.2352 | 53.55 | 77.99   | 64.54  |
| monipern  | <i>Moniliophthora perniciosa</i>     | F_Ba    | 0.7761 | 52.19 | 53.87   | 6.65   | 62.31  | 0.2239 | 59.63 | 79.02   | 59.68  |
| guyanecr  | <i>Guyanagaster necrorhiza</i>       | F_Ba    | 0.8903 | 51.14 | 52.74   | 6.38   | 64.07  | 0.1097 | 46.71 | 79.43   | 85.81  |
| tricmats  | <i>Tricholoma matsutake</i>          | F_Ba    | 0.8457 | 52.15 | 54.15   | 7.47   | 65.35  | 0.1543 | 41.47 | 79.71   | 101.18 |
| tubermela | <i>Tuber melanosporum</i>            | F_As    | 0.8608 | 54.74 | 62.05   | 19.57  | 97.55  | 0.1392 | 40.97 | 79.95   | 104.65 |
| suilbrev  | <i>Suillus brevipes</i>              | F_Ba    | 0.8763 | 51.04 | 52.96   | 6.89   | 65.1   | 0.1237 | 43.37 | 80.33   | 97.41  |
| armigall  | <i>Armillaria gallica</i>            | F_Ba    | 0.8552 | 51.02 | 52.53   | 6.02   | 62.06  | 0.1448 | 45.36 | 80.38   | 91.87  |
| boleedul  | <i>Boletus edulis</i>                | F_Ba    | 0.8861 | 51.13 | 53.81   | 8.37   | 70.4   | 0.1139 | 40.92 | 80.62   | 106.08 |
| necthaem  | <i>Nectria haematococca</i>          | F_As    | 0.6063 | 50.57 | 52.58   | 7.27   | 58.32  | 0.3937 | 51.21 | 80.63   | 77.26  |
| blumgram  | <i>Blumeria graminis</i>             | F_As    | 0.7187 | 48.33 | 51.03   | 8.3    | 61.54  | 0.2813 | 58.63 | 80.68   | 62.53  |
| aporcary  | <i>Aporpium caryae</i>               | F_Ba    | 0.9066 | 49.21 | 51.49   | 7.59   | 67.74  | 0.0934 | 47.21 | 81.45   | 89.81  |
| panestip  | <i>Panellus stipticus</i>            | F_Ba    | 0.9101 | 50.39 | 52.25   | 6.98   | 66.09  | 0.0899 | 42.2  | 81.46   | 104.63 |
| conicoro  | <i>Conidiobolus coronatus</i>        | F_En    | 0.8593 | 49.99 | 51.44   | 5.78   | 60.71  | 0.1407 | 38.39 | 82.13   | 121.78 |
| sistnive  | <i>Sistotremastrum niveocremae</i>   | F_Ba    | 0.8952 | 50.9  | 52.66   | 6.49   | 65.06  | 0.1048 | 46.19 | 82.15   | 94.37  |
| agarhyph  | <i>Agaricostilbum hyphaenes</i>      | F_Ba    | 0.9403 | 53.44 | 55.29   | 6.68   | 71.42  | 0.0597 | 58.65 | 83.05   | 66.19  |
| piriindi  | <i>Piriiformospora indica</i>        | F_Ba    | 0.8858 | 46.23 | 47.95   | 5.52   | 60.76  | 0.1142 | 56.06 | 83.22   | 73.35  |
| rhizsale  | <i>Rhizopogon salebrosus</i>         | F_Ba    | 0.8747 | 51.17 | 53.13   | 6.89   | 65.52  | 0.1253 | 42.19 | 83.44   | 110.47 |
| rhizvini  | <i>Rhizopus microsporus</i>          | F_Fu    | 0.8934 | 51.3  | 53.23   | 6.94   | 66.63  | 0.1066 | 46.79 | 84      | 97.69  |
| cybejadi  | <i>Cyberlindeira jadinii</i>         | F_As    | 0.4304 | 58.18 | 63.06   | 14.11  | 62.87  | 0.5696 | 33.98 | 84.08   | 143.4  |
| sistsuec  | <i>Sistotremastrum suecicum</i>      | F_Ba    | 0.9255 | 51.09 | 52.96   | 6.79   | 68.24  | 0.0745 | 54.19 | 84.37   | 80.41  |
| cyllitor  | <i>Cylindrobasidium torrendii</i>    | F_Ba    | 0.915  | 49.19 | 50.55   | 5.41   | 62.13  | 0.085  | 56.35 | 84.78   | 76.83  |
| ymbkboch  | <i>Symbiotaphrina kochii</i>         | F_As    | 0.7867 | 51.22 | 54.43   | 9.74   | 69.01  | 0.2133 | 57.94 | 85.27   | 72.64  |
| calovisc  | <i>Calocera viscosa</i>              | F_Ba    | 0.9045 | 49.93 | 51.47   | 5.47   | 63.27  | 0.0955 | 50.05 | 85.45   | 92.87  |
| fisthepa  | <i>Fistulina hepatica</i>            | F_Ba    | 0.7477 | 52.67 | 54.83   | 7.83   | 64.22  | 0.2523 | 52.72 | 85.7    | 87.15  |
| gyroliov  | <i>Gyrodon lividus</i>               | F_Ba    | 0.8689 | 52.22 | 55.04   | 8.86   | 71.9   | 0.1311 | 53.34 | 85.7    | 85.81  |
| collhigg  | <i>Colletotrichum higginsianum</i>   | F_As    | 0.8449 | 56.02 | 65.27   | 24.33  | 105.89 | 0.1551 | 55.84 | 85.74   | 79.16  |
| macrfuli  | <i>Macrolepiota fuliginosa</i>       | F_Ba    | 0.8659 | 52.11 | 54.17   | 7.34   | 67.09  | 0.1341 | 50.14 | 85.87   | 93.79  |
| penioxal  | <i>Penicillium oxalicum</i>          | F_As    | 0.9147 | 62.02 | 75.43   | 35.28  | 166.34 | 0.0853 | 44.71 | 85.9    | 116.42 |
| stagnodo  | <i>Stagonospora nodorum</i>          | F_As    | 0.4324 | 49.67 | 51.17   | 5.47   | 53.15  | 0.5676 | 52.57 | 85.94   | 90.05  |
| marafiar  | <i>Marasmius fiardii</i>             | F_Ba    | 0.8862 | 54.34 | 56.87   | 9.03   | 73.32  | 0.1138 | 54.15 | 86.05   | 84.93  |
| micrcani  | <i>Microsporium canis</i>            | F_As    | 0.701  | 58.56 | 62.47   | 13.12  | 74.09  | 0.299  | 57.63 | 86.24   | 79.18  |
| clavpyxi  | <i>Clavicornia pyxidata</i>          | F_Ba    | 0.8921 | 52.68 | 54.83   | 7.69   | 69.71  | 0.1079 | 53.35 | 86.68   | 88.04  |
| saitcomp  | <i>Saitoella complicata</i>          | F_As    | 0.8348 | 52.67 | 54.33   | 6.4    | 64.18  | 0.1652 | 48.89 | 86.69   | 99.15  |
| serplacr  | <i>Serpula lacrymans</i>             | F_Ba    | 0.8431 | 53.5  | 56.02   | 8.62   | 69.84  | 0.1569 | 48.22 | 87.03   | 101.86 |
| cortglau  | <i>Cortinarius glaucopus</i>         | F_Ba    | 0.8633 | 53.66 | 55.94   | 8.55   | 69.74  | 0.1367 | 42.37 | 87.26   | 120.56 |
| fusafuji  | <i>Fusarium fujikuroi</i>            | F_As    | 0.8165 | 49.93 | 52.2    | 7.64   | 64.86  | 0.1835 | 57.64 | 87.31   | 79.18  |
| penibila  | <i>Penicillium bilaiae</i>           | F_As    | 0.8451 | 56.01 | 62.52   | 17.82  | 92.74  | 0.1549 | 44.59 | 87.36   | 112.74 |
| leucgong  | <i>Leucoagaricus gongylophorus</i>   | F_Ba    | 0.8317 | 51.4  | 53.12   | 6.82   | 63.86  | 0.1683 | 50.91 | 87.58   | 101.37 |
| fibuspec  | <i>Fibulorhizoctonia spec</i>        | F_Ba    | 0.8079 | 53.02 | 55.34   | 7.99   | 66.67  | 0.1921 | 41.89 | 87.76   | 123.91 |
| phanchry  | <i>Phanerochaete chrysosporium</i>   | F_Ba    | 0.9072 | 51.96 | 54.04   | 7.03   | 69.49  | 0.0928 | 52.42 | 87.91   | 93.29  |
| crypparf  | <i>Cryphonectria parasitica</i>      | F_As    | 0.0789 | 40.14 | 44.57   | 17.65  | 53.57  | 0.9211 | 67.17 | 87.93   | 54.47  |
| zopfrhiz  | <i>Zopfia rhizophila</i>             | F_As    | 0.582  | 50.99 | 53.76   | 8.57   | 60.63  | 0.418  | 54    | 88.06   | 89.37  |
| calocorn  | <i>Calocera cornea</i>               | F_Ba    | 0.8679 | 49.94 | 51.87   | 6.14   | 64.68  | 0.1321 | 54.4  | 88.1    | 88.81  |
| gymnchry  | <i>Gymnopilus chrysopellus</i>       | F_Ba    | 0.8632 | 53.01 | 55.33   | 8.28   | 69.71  | 0.1368 | 53.39 | 88.5    | 92.64  |
| dacrspec  | <i>Dacryopinax species</i>           | F_Ba    | 0.8835 | 49.37 | 51.08   | 6.04   | 63.37  | 0.1165 | 51.01 | 89.01   | 99.69  |
| oididmai  | <i>Oidiodendron maius</i>            | F_As    | 0.6951 | 50.63 | 54.73   | 11.51  | 67.89  | 0.3049 | 53.43 | 89.09   | 93.61  |
| tricrover | <i>Trichophyton verrucosum</i>       | F_As    | 0.4803 | 60.03 | 62.95   | 11.45  | 67.26  | 0.5197 | 71.39 | 89.31   | 63.66  |
| tricipeta | <i>Trichomonascus petasosporus</i>   | F_As    | 0.6662 | 42.29 | 44.69   | 8.13   | 53.62  | 0.3338 | 42.53 | 89.35   | 126.11 |
| leucmoll  | <i>Leucogyrophana mollusca</i>       | F_Ba    | 0.8813 | 52.91 | 55.19   | 8.02   | 70.53  | 0.1187 | 57.93 | 89.6    | 85.25  |
| cephalbi  | <i>Cephaloscius albidus</i>          | F_As    | 0.4637 | 55.12 | 60.69   | 14.91  | 63.75  | 0.5363 | 43.32 | 89.63   | 123.62 |
| amanthie  | <i>Amanita thiersii</i>              | F_Ba    | 0.8579 | 51.79 | 55.09   | 9.95   | 74.36  | 0.1421 | 58.46 | 89.74   | 83.51  |
| gymnluxu  | <i>Gymnopus luxurians</i>            | F_Ba    | 0.891  | 52.71 | 55.23   | 8.39   | 72.06  | 0.109  | 47.38 | 89.74   | 112.37 |
| aspefumi  | <i>Aspergillus fumigatus</i>         | F_As    | 0.7488 | 53.66 | 58.08   | 13.6   | 74.11  | 0.2512 | 54.78 | 90.18   | 93.78  |

|           |                                     |      |        |       |       |        |        |        |       |       |        |
|-----------|-------------------------------------|------|--------|-------|-------|--------|--------|--------|-------|-------|--------|
| talamarn  | <i>Talaromyces marneffei</i>        | F_As | 0.8316 | 54.67 | 58.42 | 11.74  | 77     | 0.1684 | 55.19 | 90.18 | 93.22  |
| neollepi  | <i>Neolentiniopsis lepidus</i>      | F_Ba | 0.8852 | 52.94 | 55.32 | 8.2    | 71.43  | 0.1148 | 57.11 | 90.28 | 88.25  |
| polycitr  | <i>Polychaeton citri</i>            | F_As | 0.6763 | 56.14 | 60.58 | 12.98  | 72.33  | 0.3237 | 52.94 | 90.37 | 98.77  |
| aurivulg  | <i>Auriscalpium vulgare</i>         | F_Ba | 0.8926 | 52.53 | 54.59 | 7.41   | 69.29  | 0.1074 | 53.67 | 90.42 | 96.61  |
| phycblak  | <i>Phycomyces blakesleeanae</i>     | F_Fu | 0.0986 | 35.14 | 65.52 | 81.65  | 55.83  | 0.9014 | 65.49 | 90.54 | 65.84  |
| binunova  | <i>Bimuria novae-zelandiae</i>      | F_As | 0.5896 | 49.64 | 51.93 | 7.24   | 58.94  | 0.4104 | 58.57 | 90.62 | 84.96  |
| pucocstri | <i>Puccinia striiformis</i>         | F_Ba | 0.6147 | 74.07 | 80.76 | 21.24  | 89.54  | 0.3853 | 47.48 | 90.78 | 113.56 |
| mioxosmu  | <i>Mixia osmundae</i>               | F_Ba | 0.8926 | 50.11 | 51.65 | 6.16   | 63.8   | 0.1074 | 55.27 | 90.95 | 93.85  |
| cadospes  | <i>Cadophora spec</i>               | F_As | 0.6151 | 49.4  | 52.74 | 9.4    | 62.99  | 0.3849 | 61.5  | 91.14 | 78.91  |
| aurepulg  | <i>Aureobasidium pulm. lulans</i>   | F_As | 0.7441 | 52.25 | 53.83 | 6.29   | 61.91  | 0.2559 | 55.36 | 91.29 | 94.26  |
| cephfrag  | <i>Cephaloscypha fragrans</i>       | F_As | 0.4355 | 53.97 | 57.96 | 11.13  | 60.87  | 0.5645 | 52.8  | 91.46 | 101.84 |
| dendbisp  | <i>Dendrothele bisporea</i>         | F_Ba | 0.795  | 53.56 | 58.21 | 13.01  | 77.61  | 0.205  | 45.27 | 91.55 | 123.44 |
| zasmcell  | <i>Zasmidium cellare</i>            | F_As | 0.7346 | 52.2  | 54.34 | 7.56   | 63.93  | 0.2654 | 53.88 | 91.66 | 99.3   |
| laccbico  | <i>Laccaria bicolor</i>             | F_Ba | 0.6533 | 51.69 | 53.34 | 6.54   | 59.48  | 0.3467 | 48.71 | 91.88 | 113.47 |
| pleuostr  | <i>Pleurotus ostreatus</i>          | F_Ba | 0.8459 | 52.18 | 54    | 6.94   | 65.48  | 0.1541 | 51.66 | 91.88 | 105.51 |
| ilyospec  | <i>Ilyonectria spec</i>             | F_As | 0.7317 | 52.42 | 56.14 | 11.21  | 69.97  | 0.2683 | 53.99 | 91.97 | 99.73  |
| obbarivu  | <i>Obba rivulosa</i>                | F_Ba | 0.8821 | 52.82 | 54.87 | 7.47   | 69.18  | 0.1179 | 57.03 | 92.03 | 92.9   |
| sphastel  | <i>Sphaerobolus stellatus</i>       | F_Ba | 0.8646 | 52.71 | 54.58 | 7.43   | 66.74  | 0.1354 | 39.88 | 92.04 | 148.16 |
| lipostar  | <i>Lipomyces starkeyi</i>           | F_As | 0.8363 | 52.15 | 54.87 | 8.88   | 70.2   | 0.1637 | 57.15 | 92.07 | 92.88  |
| rickmell  | <i>Rickenella mellea</i>            | F_Ba | 0.9041 | 52.43 | 54.12 | 6.5    | 67.31  | 0.0959 | 54.24 | 92.1  | 99.58  |
| monapurp  | <i>Monascus purpureus</i>           | F_As | 0.8578 | 58.42 | 65.3  | 19.58  | 98.58  | 0.1422 | 45.77 | 92.13 | 122.46 |
| schicyro  | <i>Schizosaccharomyces cryophil</i> | F_As | 0.6178 | 46.36 | 49.55 | 11.84  | 60.98  | 0.3822 | 65.32 | 92.13 | 77.78  |
| arthbenh  | <i>Arthroderma benhamiae</i>        | F_As | 0.4843 | 59.91 | 62.78 | 11.43  | 67.8   | 0.5157 | 76.31 | 92.14 | 62.96  |
| eurorubr  | <i>Eurotium rubrum</i>              | F_As | 0.8434 | 52.03 | 55.92 | 11.54  | 76.45  | 0.1566 | 49.28 | 92.15 | 112.52 |
| penichry  | <i>Penicillium chrysogenum</i>      | F_As | 0.7019 | 53.59 | 57.26 | 11.16  | 69.87  | 0.2981 | 58.2  | 92.3  | 89.76  |
| heteanno  | <i>Heterobasidium annosum</i>       | F_Ba | 0.8106 | 54.02 | 57.28 | 10.02  | 73.14  | 0.1894 | 55.9  | 92.48 | 96.45  |
| laetsulp  | <i>Laetiporus sulphureus</i>        | F_Ba | 0.8633 | 53.49 | 55.79 | 8.15   | 70.19  | 0.1367 | 51.69 | 92.59 | 107.28 |
| phlegiga  | <i>Phlebiopsis gigantea</i>         | F_Ba | 0.8973 | 52.04 | 53.64 | 6.3    | 66.12  | 0.1027 | 54.13 | 92.79 | 101.4  |
| podoanse  | <i>Podospora anserina</i>           | F_As | 0.7189 | 56.73 | 59.94 | 10.94  | 72.79  | 0.2811 | 67.49 | 92.96 | 69.45  |
| phancarn  | <i>Phanerochaete carmosa</i>        | F_Ba | 0.8877 | 52.5  | 54.51 | 7.13   | 68.43  | 0.1123 | 45.96 | 93.1  | 126.8  |
| myriduri  | <i>Myriangium duriae</i>            | F_As | 0.7895 | 51.48 | 52.98 | 5.98   | 62.04  | 0.2105 | 57.86 | 93.13 | 92.61  |
| challong  | <i>Chalara longipes</i>             | F_As | 0.6899 | 49.41 | 52.26 | 8.38   | 63.87  | 0.3101 | 62.78 | 93.18 | 81.17  |
| naiaflui  | <i>Naiadella fluitansa</i>          | F_Ba | 0.8565 | 70.16 | 77.6  | 22.71  | 110.97 | 0.1435 | 48.16 | 93.45 | 119.1  |
| aspenidu  | <i>Aspergillus nidulans</i>         | F_As | 0.6982 | 51.56 | 55.77 | 12.68  | 69.97  | 0.3018 | 58.57 | 93.48 | 92.59  |
| gloetrab  | <i>Gloeophyllum trabeum</i>         | F_Ba | 0.8675 | 52.98 | 54.94 | 7.39   | 68.07  | 0.1325 | 52.1  | 93.89 | 109.62 |
| myroinun  | <i>Myrothecium inundatum</i>        | F_As | 0.7156 | 53.8  | 58.1  | 12.62  | 72.78  | 0.2844 | 56.38 | 93.99 | 98.65  |
| talaacul  | <i>Talaromyces aculeatus</i>        | F_As | 0.8486 | 53.83 | 57.8  | 11.99  | 79.29  | 0.1514 | 54.79 | 94.22 | 103.46 |
| schipara  | <i>Schizopora paradoxa</i>          | F_Ba | 0.8904 | 53.75 | 56.36 | 8.95   | 74.52  | 0.1096 | 60.37 | 94.27 | 90.84  |
| monarube  | <i>Monascus ruber</i>               | F_As | 0.8472 | 58.48 | 65.12 | 19.15  | 96.12  | 0.1528 | 51.17 | 94.31 | 113.16 |
| macranom  | <i>Macroventuria anomochaeta</i>    | F_As | 0.6522 | 49.53 | 51.26 | 5.84   | 58.44  | 0.3478 | 58.48 | 94.48 | 94.57  |
| penilano  | <i>Penicillium lanosocoeeruleum</i> | F_As | 0.8256 | 53.53 | 58.04 | 12.78  | 80.23  | 0.1744 | 57.21 | 94.63 | 99.64  |
| fibradi   | <i>Fibroporia radiculosa</i>        | F_Ba | 0.9176 | 52.88 | 54.84 | 7.43   | 70.4   | 0.0824 | 44.44 | 94.88 | 144.14 |
| lorajunc  | <i>Loramycetes juncicola</i>        | F_As | 0.6419 | 48.71 | 51.53 | 8.18   | 62.21  | 0.3581 | 64.69 | 94.92 | 81.28  |
| melibico  | <i>Meliniomyces bicolor</i>         | F_As | 0.6613 | 49.42 | 52.46 | 8.8    | 63.58  | 0.3387 | 60.67 | 94.97 | 90.49  |
| sporlind  | <i>Sporobolomyces linderiae</i>     | F_Ba | 0.8913 | 37.6  | 38.37 | 3.04   | 49.37  | 0.1087 | 78.84 | 95.33 | 52.39  |
| lentfluv  | <i>Lenithecium fluviatile</i>       | F_As | 0.6661 | 49.43 | 52.11 | 7.9    | 62.3   | 0.3339 | 58.98 | 95.38 | 95.57  |
| panurudi  | <i>Panus rudis</i>                  | F_Ba | 0.8713 | 54.32 | 57.12 | 9.29   | 75.04  | 0.1287 | 62.44 | 95.38 | 89.29  |
| cochvict  | <i>Cochliobolus victoriae</i>       | F_As | 0.7089 | 50.4  | 53.86 | 9.71   | 67.38  | 0.2911 | 59.4  | 95.46 | 94.79  |
| corycass  | <i>Corynespora cassicola</i>        | F_As | 0.7173 | 49.88 | 52.98 | 8.98   | 65.45  | 0.2827 | 58.68 | 95.5  | 97.81  |
| penicane  | <i>Penicillium canescens</i>        | F_As | 0.8325 | 51.96 | 56.06 | 11.67  | 77.97  | 0.1675 | 58.94 | 95.58 | 96.19  |
| cerisubv  | <i>Ceriporiopsis subvermispora</i>  | F_Ba | 0.8619 | 52.86 | 55.11 | 7.86   | 69.48  | 0.1381 | 52.7  | 95.69 | 112.89 |
| candtan   | <i>Candida tanzawaensis</i>         | F_As | 0.224  | 43.21 | 51.89 | 27.75  | 47.94  | 0.776  | 47.88 | 95.7  | 126.98 |
| cochmiya  | <i>Cochliobolus miyabeanus</i>      | F_As | 0.7107 | 50.48 | 53.96 | 9.78   | 67.66  | 0.2893 | 60.17 | 95.82 | 93.87  |
| fusagram  | <i>Fusarium graminearum</i>         | F_As | 0.6081 | 50.76 | 52.7  | 7.07   | 59.92  | 0.3919 | 63.2  | 95.84 | 88.28  |
| saccprot  | <i>Saccharata proteae</i>           | F_As | 0.5824 | 52    | 55.42 | 9.91   | 64.22  | 0.4176 | 59.01 | 95.88 | 96.8   |
| pachtann  | <i>Pachysolen tannophilus</i>       | F_As | 0.5284 | 44.29 | 93.91 | 133.77 | 98.13  | 0.4716 | 88.37 | 95.94 | 30.1   |
| cochcarb  | <i>Cochliobolus carbonum</i>        | F_As | 0.7162 | 50.4  | 53.88 | 9.74   | 67.93  | 0.2838 | 60.07 | 96.2  | 94.98  |
| sporfime  | <i>Sporormia fimetaria</i>          | F_As | 0.734  | 48.12 | 50.35 | 6.82   | 61.71  | 0.266  | 62.94 | 96.38 | 88.86  |
| tricabie  | <i>Trichaptum abietinum</i>         | F_Ba | 0.876  | 53.9  | 56.6  | 8.99   | 74.19  | 0.124  | 57.48 | 96.38 | 102.51 |
| phomtrac  | <i>Phoma tracheiphila</i>           | F_As | 0.6701 | 50.01 | 53.01 | 8.66   | 64.5   | 0.3299 | 63.42 | 96.41 | 87.85  |
| cerrunic  | <i>Cerrena unicolor</i>             | F_Ba | 0.8807 | 54.15 | 56.56 | 8.48   | 72.93  | 0.1193 | 56.41 | 96.51 | 105.4  |
| wilcmiko  | <i>Wilcoxina mikolae</i>            | F_As | 0.73   | 53.04 | 55.82 | 9.54   | 68.09  | 0.27   | 61.43 | 96.52 | 92.69  |
| penibrev  | <i>Penicillium brevicompactum</i>   | F_As | 0.8448 | 51.96 | 55.68 | 10.98  | 77.03  | 0.1552 | 61.09 | 96.81 | 94.06  |
| aspecamp  | <i>Aspergillus campestris</i>       | F_As | 0.8149 | 53.89 | 60.67 | 18.38  | 90.43  | 0.1851 | 52.25 | 96.98 | 118.57 |
| bysscitr  | <i>Byssotrichum circinans</i>       | F_As | 0.6514 | 49.55 | 52.88 | 9.31   | 64.71  | 0.3486 | 61.91 | 97.11 | 92.82  |
| karsrhod  | <i>Karstenula rhodostom</i>         | F_As | 0.6687 | 49.65 | 51.86 | 7.14   | 61.64  | 0.3313 | 65.31 | 97.14 | 85.02  |
| rhodtoru  | <i>Rhodosporeidium toruloides</i>   | F_Ba | 0.8008 | 57.2  | 60.4  | 9.17   | 77.63  | 0.1992 | 75.62 | 97.17 | 62.35  |
| paraspor  | <i>Paraconiothyrium sporulosum</i>  | F_As | 0.6783 | 49.46 | 51.7  | 7.07   | 61.75  | 0.3217 | 65.43 | 97.24 | 85.22  |
| hydnpina  | <i>Hydnomerulius pinastr</i>        | F_Ba | 0.8947 | 52.41 | 55.17 | 8.67   | 74.87  | 0.1053 | 52.65 | 97.25 | 117.42 |
| peniexpa  | <i>Penicillium expansum</i>         | F_As | 0.8251 | 53.94 | 58.05 | 12.16  | 79.22  | 0.1749 | 61.82 | 97.27 | 93.39  |
| aploprun  | <i>Aplosporella prunicola</i>       | F_As | 0.7245 | 52.17 | 56.05 | 11.23  | 70.97  | 0.2755 | 61.6  | 97.36 | 95.77  |
| aspeochr  | <i>Aspergillus ochraceo-roseus</i>  | F_As | 0.8649 | 55.94 | 64.39 | 22.53  | 109.48 | 0.1351 | 44.34 | 97.37 | 142.71 |
| cenogeop  | <i>Cenococcum geophilum</i>         | F_As | 0.679  | 51.7  | 55.85 | 11.61  | 69.74  | 0.321  | 60.76 | 97.37 | 96.63  |
| armimell  | <i>Armillaria mellea</i>            | F_Ba | 0.8389 | 50.76 | 52.25 | 5.94   | 62.62  | 0.1611 | 52.59 | 97.41 | 124.71 |
| amnilig   | <i>Ammniculicola lignicola</i>      | F_As | 0.6689 | 50.05 | 52.63 | 7.79   | 62.89  | 0.3311 | 61.5  | 97.48 | 94.77  |
| aspeglau  | <i>Aspergillus glaucus</i>          | F_As | 0.8296 | 52.45 | 56.13 | 11.25  | 75.67  | 0.1704 | 55.15 | 97.5  | 111.57 |
| stangris  | <i>Stanjemonium grisellum</i>       | F_As | 0.7542 | 51.55 | 55.72 | 11.93  | 72.8   | 0.2458 | 55.12 | 97.5  | 111.39 |
| perimacr  | <i>Periconia macrospinoso</i>       | F_As | 0.6428 | 51.49 | 55.7  | 11.76  | 68.85  | 0.3572 | 63.58 | 97.53 | 89.86  |
| apiomont  | <i>Apiospora montagnei</i>          | F_As | 0.8653 | 58.4  | 71.52 | 34.43  | 139.75 | 0.1347 | 52.11 | 97.55 | 119.34 |
| aspenige  | <i>Aspergillus niger</i>            | F_As | 0.7179 | 53.99 | 59.27 | 15.31  | 76.49  | 0.2821 | 54.49 | 97.57 | 113.08 |
| gymnaura  | <i>Gymnascella aurantiaca</i>       | F_As | 0.7697 | 55.42 | 60.77 | 15.4   | 81.58  | 0.2303 | 59.31 | 97.62 | 100.53 |
| baudcomp  | <i>Baudoinia compniacensis</i>      | F_As | 0.7576 | 53.73 | 56.91 | 10.07  | 71.01  | 0.2424 | 62.45 | 97.7  | 94.94  |
| agarbisp  | <i>Agaricus bisporus</i>            | F_Ba | 0.8916 | 52.06 | 54.1  | 7.44   | 69.1   | 0.1084 | 52.08 | 97.73 | 120.46 |
| glonstel  | <i>Glonium stellatum</i>            | F_As | 0.6767 | 51.97 | 55.81 | 11.04  | 69.29  | 0.3233 | 63.87 | 97.85 | 90.39  |
| clatelyn  | <i>Clathrospora elyngae</i>         | F_As | 0.6795 | 49.79 | 52.41 | 7.76   | 63.21  | 0.3205 | 62.45 | 97.88 | 93.64  |
| penifell  | <i>Penicillium fellutanum</i>       | F_As | 0.8636 | 53.76 | 58.41 | 13.18  | 85.3   | 0.1364 | 54.85 | 97.94 | 113.26 |
| peniglab  | <i>Penicillium glabrum</i>          | F_As | 0.8517 | 53.1  | 57.51 | 12.56  | 82.24  | 0.1483 | 56.32 | 97.95 | 109.55 |
| polyfusc  | <i>Polyposphaeria fusca</i>         | F_As | 0.7288 | 48.99 | 51.01 | 6.7    | 61.59  | 0.2712 | 64.4  | 98.12 | 89.58  |
| thozspec  | <i>Thozetella spec</i>              | F_As | 0.7449 | 56.52 | 61.9  | 15.49  | 80.82  | 0.2551 | 57.39 | 98.15 | 106.91 |
| melivari  | <i>Meliniomyces variabilis</i>      | F_As | 0.7113 | 49.41 | 52.47 | 8.84   | 66.05  | 0.2887 | 65.22 | 98.3  | 88.27  |
| bjeradus  | <i>Bjerkandera adusta</i>           | F_Ba | 0.921  | 51.73 | 53.46 | 6.38   | 68.31  | 0.079  | 54.89 | 98.55 | 114.76 |
| theraura  | <i>Thermoascus aurantiacus</i>      | F_As | 0.762  | 55.53 | 63.35 | 20.74  | 90.54  | 0.238  | 55.08 | 98.71 | 115.04 |
| caliorie  | <i>Caliciopsis orientalis</i>       | F_As | 0.6219 | 52.77 | 56.19 | 10.63  | 68.4   | 0.3781 | 67.98 | 98.77 | 80.92  |
| erythase  | <i>Erythrobasidium hasegawianum</i> | F_Ba | 0.9407 | 55.81 | 58.68 | 9.9    | 83.97  | 0.0593 | 72.56 | 98.82 | 76.56  |
| botbrtr   | <i>Botryobasidium botryosum</i>     | F_Ba | 0.9147 | 58.65 | 61.61 | 10.39  | 83.51  | 0.0853 | 57.87 | 98.89 | 107.69 |
| penirais  | <i>Penicillium raistrickii</i>      | F_As | 0.8416 | 52.23 | 56.34 | 11.78  | 79.61  | 0.1584 | 61.91 | 98.9  | 97.4   |

|           |                                       |      |        |       |       |       |        |        |       |        |        |
|-----------|---------------------------------------|------|--------|-------|-------|-------|--------|--------|-------|--------|--------|
| ophidiss  | <i>Ophiostoma piceae</i>              | F_As | 0.7174 | 49.27 | 51.64 | 7.2   | 62.68  | 0.2826 | 59.74 | 99.08  | 103.18 |
| cerczeae  | <i>Cercospora zeaemaydis</i>          | F_As | 0.634  | 52.41 | 55.76 | 9.88  | 66.26  | 0.366  | 59.06 | 99.16  | 105.2  |
| trichisip | <i>Trichodiletschia bisporula</i>     | F_As | 0.7673 | 46.31 | 49.28 | 8.76  | 64.82  | 0.2327 | 59.05 | 99.16  | 105.18 |
| puncstri  | <i>Punctularia strigosozonata</i>     | F_Ba | 0.8801 | 53.05 | 55.6  | 8.53  | 73.14  | 0.1199 | 57.07 | 99.18  | 110.44 |
| antrsinu  | <i>Antrodia sinuosa</i>               | F_Ba | 0.899  | 53.64 | 56.23 | 8.75  | 75.36  | 0.101  | 61.83 | 99.31  | 99.61  |
| jaapargi  | <i>Jaapia argillacea</i>              | F_Ba | 0.8929 | 53.74 | 56.35 | 8.85  | 75.12  | 0.1071 | 61.17 | 99.33  | 100.69 |
| pseuhype  | <i>Pseudovirgaria hyperparasitica</i> | F_As | 0.7269 | 50    | 52.81 | 8.41  | 66.15  | 0.2731 | 65.16 | 99.51  | 91.02  |
| conipute  | <i>Coniophora puteana</i>             | F_Ba | 0.8527 | 52.87 | 55.99 | 9.85  | 74.68  | 0.1473 | 57.22 | 99.57  | 111.12 |
| didyexig  | <i>Didymella exigua</i>               | F_As | 0.6825 | 48.97 | 50.88 | 6     | 59.6   | 0.3175 | 59.83 | 99.61  | 104.32 |
| candcase  | <i>Candida caseinolytica</i>          | F_As | 0.2546 | 50.91 | 54.23 | 10.66 | 52.15  | 0.7454 | 46.86 | 99.71  | 142.46 |
| mycether  | <i>Myceliophthora thermophila</i>     | F_As | 0.7545 | 58.01 | 73.46 | 41.2  | 114.91 | 0.2455 | 77.5  | 99.73  | 69.93  |
| hyphsubl  | <i>Hypholoma sublateritium</i>        | F_Ba | 0.8878 | 53.35 | 55.56 | 8.46  | 71.7   | 0.1122 | 55.76 | 99.76  | 115.41 |
| melapulv  | <i>Melanomma pulvis-pyrius</i>        | F_As | 0.7184 | 50.42 | 53.56 | 9.08  | 67.34  | 0.2816 | 64.65 | 99.76  | 93.37  |
| volvolv   | <i>Volvariella volvacea</i>           | F_Ba | 0.7012 | 51.8  | 54.05 | 7.82  | 63.45  | 0.2988 | 55.07 | 99.88  | 117.52 |
| massebur  | <i>Massarina eburnea</i>              | F_As | 0.725  | 49.63 | 53.41 | 10.31 | 70.24  | 0.275  | 65.98 | 100.02 | 90.63  |
| thelmirc  | <i>Thelebolus microsporus</i>         | F_As | 0.6048 | 50.8  | 54.46 | 9.97  | 64.82  | 0.3952 | 61.35 | 100.17 | 103.18 |
| aspezona  | <i>Aspergillus zonatus</i>            | F_As | 0.8378 | 57.75 | 61.87 | 15.17 | 83.96  | 0.1622 | 54.69 | 100.28 | 119.61 |
| pyrespec  | <i>Pyrenochaeta spec</i>              | F_As | 0.7427 | 49.63 | 52.37 | 8.09  | 66.33  | 0.2573 | 67.2  | 100.4  | 88.85  |
| trempt    | <i>Trematosphaeria pertusa</i>        | F_As | 0.707  | 49.89 | 52.54 | 7.99  | 64.81  | 0.293  | 66.16 | 100.44 | 91.3   |
| westorna  | <i>Westerdykella ornata</i>           | F_As | 0.6999 | 50.26 | 53.37 | 9     | 66.91  | 0.3001 | 66.65 | 100.51 | 90.26  |
| aspeydo   | <i>Aspergillus sydowii</i>            | F_As | 0.8447 | 52.73 | 57.62 | 14.4  | 83.69  | 0.1553 | 56.14 | 100.69 | 116.85 |
| lepipalu  | <i>Lepidopterella palustri</i>        | F_As | 0.6784 | 52.08 | 56.28 | 11.75 | 71.06  | 0.3216 | 64.9  | 100.81 | 95.29  |
| thieappe  | <i>Thielavia appendiculata</i>        | F_As | 0.6442 | 56.6  | 61.89 | 15.37 | 75.64  | 0.3558 | 60.43 | 100.84 | 106.05 |
| verrenal  | <i>Verruculina enalia</i>             | F_As | 0.6807 | 50.25 | 53.12 | 8.6   | 65.1   | 0.3193 | 64.65 | 100.84 | 95.69  |
| erembila  | <i>Eremomyces bilateralis</i>         | F_As | 0.7399 | 50.41 | 53.56 | 9.24  | 68.27  | 0.2601 | 63.29 | 100.97 | 99.18  |
| galemarg  | <i>Galerina marginata</i>             | F_Ba | 0.89   | 53.19 | 55.53 | 8.34  | 72.45  | 0.11   | 55.24 | 100.98 | 120.24 |
| lichhyal  | <i>Lichtheimia hyalospora</i>         | F_Fu | 0.9037 | 56.39 | 59.01 | 9.23  | 78.8   | 0.0963 | 68.39 | 101.04 | 89.11  |
| micrithr  | <i>Microascus trizonosporus</i>       | F_As | 0.7478 | 56.93 | 63.47 | 18.14 | 85.87  | 0.2522 | 58.39 | 101.04 | 111.89 |
| sclectir  | <i>Scleroderma citrinum</i>           | F_Ba | 0.8021 | 51.35 | 55.8  | 12.47 | 78.01  | 0.1979 | 60.82 | 101.43 | 106.55 |
| dothsymp  | <i>Dothidotia symphoricarpi</i>       | F_As | 0.7246 | 50.08 | 52.7  | 7.83  | 65.47  | 0.2754 | 66.61 | 101.6  | 93.22  |
| terfboud  | <i>Terfezia boudieri</i>              | F_As | 0.7313 | 55.43 | 61.57 | 16.85 | 82.49  | 0.2687 | 63.16 | 101.81 | 103.74 |
| rhizeric  | <i>Rhizoscyphus ericae</i>            | F_As | 0.6657 | 49.32 | 52.42 | 8.94  | 64.91  | 0.3343 | 64.84 | 101.93 | 97.96  |
| cucuberb  | <i>Cucurbitaria berberidis</i>        | F_As | 0.7333 | 50    | 52.95 | 8.57  | 67.01  | 0.2667 | 64.88 | 101.96 | 98.18  |
| postplac  | <i>Postia placenta</i>                | F_Ba | 0.7155 | 53.05 | 54.88 | 7.1   | 63.29  | 0.2845 | 51.68 | 102.08 | 132.98 |
| dotsept   | <i>Dothistroma septosporum</i>        | F_As | 0.6454 | 51.78 | 54.6  | 8.49  | 64.52  | 0.3546 | 62.28 | 102.1  | 105.42 |
| stagspec  | <i>Stagonospora spec</i>              | F_As | 0.7426 | 49.55 | 52.02 | 7.48  | 65.08  | 0.2574 | 67.27 | 102.33 | 93.56  |
| laccamet  | <i>Laccaria amethystina</i>           | F_Ba | 0.8228 | 52.15 | 54.52 | 8.37  | 68.45  | 0.1772 | 53.67 | 102.39 | 129.05 |
| ascoimme  | <i>Ascobolus immersus</i>             | F_As | 0.6748 | 49.76 | 53.86 | 11.56 | 68.8   | 0.3252 | 60.86 | 102.42 | 109.1  |
| septmusi  | <i>Septoria musiva</i>                | F_As | 0.8212 | 55.18 | 68.55 | 35.77 | 127.17 | 0.1788 | 68.7  | 102.48 | 94.11  |
| cochhete  | <i>Cochliobolus heterostrophus</i>    | F_As | 0.6931 | 50.59 | 54.75 | 11.35 | 69.82  | 0.3069 | 58.96 | 102.59 | 114.63 |
| schicomm  | <i>Schizophyllum commune</i>          | F_Ba | 0.8014 | 50.5  | 52.27 | 6.17  | 63.43  | 0.1986 | 62.86 | 102.67 | 104.76 |
| penijant  | <i>Penicillium janthinellum</i>       | F_As | 0.7947 | 56.65 | 62.14 | 15.69 | 85.84  | 0.2053 | 60.42 | 102.76 | 111.05 |
| aspestey  | <i>Aspergillus steynii</i>            | F_As | 0.8193 | 54.12 | 59.76 | 16.32 | 86.59  | 0.1807 | 58.52 | 102.79 | 116.17 |
| gymncitr  | <i>Gymnascella citrina</i>            | F_As | 0.8038 | 54.71 | 59.74 | 14.59 | 82.78  | 0.1962 | 58.02 | 102.82 | 117.9  |
| setoturc  | <i>Setosphaeria turcica</i>           | F_As | 0.7534 | 49.61 | 54.58 | 13.17 | 75.71  | 0.2466 | 51.53 | 103.02 | 136.43 |
| xantpari  | <i>Xanthoria parietina</i>            | F_As | 0.7355 | 51.59 | 55.51 | 11.15 | 72.77  | 0.2645 | 68.54 | 103.13 | 93.55  |
| copricine | <i>Coprinopsis cinerea</i>            | F_Ba | 0.8228 | 53.02 | 55.24 | 7.76  | 68.89  | 0.1772 | 65.28 | 103.25 | 101.86 |
| suillute  | <i>Suillus luteus</i>                 | F_Ba | 0.814  | 51.5  | 54.29 | 8.91  | 70.34  | 0.186  | 61.12 | 103.38 | 110.84 |
| phylcitr  | <i>Phyllosticta citriasiana</i>       | F_As | 0.6603 | 49.98 | 53.34 | 9.81  | 66.62  | 0.3397 | 67.35 | 103.39 | 95.75  |
| plicciris | <i>Plicaturospis crispa</i>           | F_Ba | 0.9159 | 54.39 | 56.58 | 8.21  | 74.7   | 0.0841 | 60.91 | 103.44 | 111.63 |
| conilign  | <i>Coniochaeta lignaria</i>           | F_As | 0.7575 | 56.43 | 61.36 | 14.38 | 80.11  | 0.2425 | 51.9  | 103.46 | 135.96 |
| trypelut  | <i>Trypethelium eluteriae</i>         | F_As | 0.7195 | 52.32 | 55.8  | 10.48 | 71.15  | 0.2805 | 69.31 | 103.53 | 91.75  |
| pateatra  | <i>Patellaria atrata</i>              | F_As | 0.6797 | 51.29 | 54.62 | 9.64  | 67.84  | 0.3203 | 65.24 | 103.55 | 101.05 |
| glomacut  | <i>Glomerella acutata</i>             | F_As | 0.7499 | 54.9  | 60.34 | 15.09 | 81.44  | 0.2501 | 61.7  | 103.72 | 110.22 |
| metsbicu  | <i>Metschnikowia bicuspidata</i>      | F_As | 0.0477 | 56.45 | 57.74 | 4.61  | 30.02  | 0.9523 | 46.49 | 103.99 | 156.09 |
| rhizoryz  | <i>Rhizopus oryzae</i>                | F_Fu | 0.6731 | 51.65 | 53.82 | 8.63  | 64.85  | 0.3269 | 73.95 | 104.21 | 85.22  |
| lophmacr  | <i>Lophiostoma macrostomum</i>        | F_As | 0.6671 | 50.12 | 52.9  | 8.31  | 65.11  | 0.3329 | 69.97 | 104.32 | 92.22  |
| cordmili  | <i>Cordyceps militaris</i>            | F_As | 0.624  | 54.23 | 59.03 | 14.53 | 71.2   | 0.376  | 52.7  | 104.42 | 136.39 |
| rhodspec  | <i>Rhodotulula spec</i>               | F_Ba | 0.8606 | 65.81 | 72.78 | 19.19 | 108.46 | 0.1394 | 58.63 | 104.45 | 120.2  |
| collfalc  | <i>Colletotrichum falcatum</i>        | F_As | 0.7132 | 55.46 | 63.09 | 20.37 | 86.73  | 0.2868 | 63.11 | 104.57 | 108.88 |
| pleosipa  | <i>Pleomassaria siparia</i>           | F_As | 0.6319 | 51.29 | 54.92 | 10.26 | 67.26  | 0.3681 | 64.9  | 104.6  | 104.52 |
| collgram  | <i>Colletotrichum graminicola</i>     | F_As | 0.8046 | 54.45 | 61.06 | 17.69 | 91.93  | 0.1954 | 70.39 | 104.73 | 93.43  |
| trivicire | <i>Trichoderma virens</i>             | F_As | 0.6552 | 58.65 | 63.49 | 15.05 | 77.48  | 0.3448 | 63.29 | 104.74 | 108.82 |
| aosarxi   | <i>Aosphaeria arxii</i>               | F_As | 0.7403 | 51.39 | 55.08 | 10.46 | 72.13  | 0.2597 | 66.44 | 104.75 | 101.03 |
| glarizoo  | <i>Glarea lozoyensis</i>              | F_As | 0.7625 | 49.08 | 51.62 | 7.61  | 66.81  | 0.2375 | 70.14 | 104.77 | 91.52  |
| glomcing  | <i>Glomerella cingulata</i>           | F_As | 0.7379 | 52.73 | 56.39 | 10.81 | 72.11  | 0.2621 | 60.62 | 104.78 | 115.9  |
| phlebrev  | <i>Phlebia brevispora</i>             | F_Ba | 0.8707 | 52.77 | 55.09 | 7.91  | 70.91  | 0.1293 | 53.46 | 105.06 | 136.8  |
| sporrose  | <i>Sporobolomyces roseus</i>          | F_Ba | 0.6747 | 69.44 | 73.65 | 14.47 | 85.51  | 0.3253 | 64.71 | 105.06 | 108.96 |
| wolfcoco  | <i>Wolfiporia cocos</i>               | F_Ba | 0.856  | 52.7  | 54.9  | 7.94  | 69.43  | 0.144  | 52.37 | 105.3  | 141.93 |
| cochsati  | <i>Cochliobolus sativus</i>           | F_As | 0.748  | 50.39 | 54.3  | 10.67 | 72.31  | 0.252  | 63.3  | 105.31 | 110.94 |
| aurisubg  | <i>Auricularia subglabra</i>          | F_Ba | 0.8568 | 50.74 | 52.54 | 7.15  | 64.86  | 0.1432 | 43.55 | 105.36 | 174.28 |
| mytiresi  | <i>Mytilinidion resinicola</i>        | F_As | 0.7036 | 51.19 | 54.68 | 10.07 | 69.52  | 0.2964 | 66.54 | 105.36 | 102.64 |
| schijapo  | <i>Schizosaccharomyces japonicus</i>  | F_As | 0.6871 | 46.84 | 50.9  | 14.12 | 70.51  | 0.3129 | 78.89 | 105.44 | 77.72  |
| cochluna  | <i>Cochliobolus lunatus</i>           | F_As | 0.7311 | 50.75 | 54.22 | 9.87  | 70.09  | 0.2689 | 63.93 | 105.52 | 109.13 |
| altealte  | <i>Alternaria alternata</i>           | F_As | 0.7651 | 49.82 | 52.9  | 8.81  | 69.73  | 0.2349 | 69.3  | 105.57 | 96.65  |
| dissacic  | <i>Dissoconium aciculare</i>          | F_As | 0.726  | 55.29 | 62.13 | 18.12 | 85.17  | 0.274  | 59.57 | 105.62 | 120.99 |
| fomipini  | <i>Fomitopsis pinicola</i>            | F_Ba | 0.8641 | 52.99 | 55.1  | 7.76  | 69.57  | 0.1359 | 53.01 | 105.63 | 139.89 |
| hebecyli  | <i>Hebeloma cylindrosporium</i>       | F_Ba | 0.8392 | 53.26 | 55.83 | 8.91  | 71.82  | 0.1608 | 59.12 | 105.69 | 122.19 |
| hyphburt  | <i>Hyphopichia burtonii</i>           | F_As | 0.2007 | 52.81 | 55.52 | 8.25  | 51.96  | 0.7993 | 48.81 | 106.21 | 154.15 |
| thiehyrc  | <i>Thielavia hircanica</i>            | F_As | 0.6887 | 57.65 | 64.64 | 19.36 | 84.55  | 0.3113 | 62.33 | 106.39 | 115.59 |
| tricrubr  | <i>Trichophyton rubrum</i>            | F_As | 0.7658 | 59.43 | 64.07 | 14.72 | 83.82  | 0.2342 | 73.33 | 106.43 | 93.2   |
| acidrich  | <i>Acidomyces richmondensis</i>       | F_As | 0.7137 | 55.05 | 58.5  | 11.15 | 72.69  | 0.2863 | 68.76 | 106.44 | 102.84 |
| aulohede  | <i>Aulographum hederiae</i>           | F_As | 0.6675 | 51.03 | 54.81 | 10.48 | 70     | 0.3325 | 70.44 | 106.47 | 96.01  |
| asconigr  | <i>Ascodesmis nigricans</i>           | F_As | 0.8273 | 50.78 | 56.36 | 14.8  | 88.76  | 0.1727 | 70.65 | 106.64 | 95.94  |
| paxirubi  | <i>Paxillus rubicundulus</i>          | F_Ba | 0.775  | 52.48 | 56.03 | 10.79 | 73.4   | 0.225  | 62.91 | 106.71 | 115.09 |
| deliconf  | <i>Deltischia confertaspera</i>       | F_As | 0.6802 | 50.97 | 54.23 | 9.49  | 68.41  | 0.3198 | 71.21 | 106.72 | 95.16  |
| tritspec  | <i>Tritirachium species</i>           | F_Ba | 0.9466 | 61.09 | 66.32 | 15.77 | 111.14 | 0.0534 | 64.53 | 106.86 | 111.86 |
| beaubass  | <i>Beauveria bassiana</i>             | F_As | 0.6991 | 53.28 | 59.36 | 16.6  | 79.93  | 0.3009 | 64.35 | 106.98 | 111.81 |
| aspeacul  | <i>Aspergillus aculeatus</i>          | F_As | 0.8044 | 54.97 | 63.38 | 22.33 | 99.5   | 0.1956 | 52.07 | 107    | 147.78 |
| daedquer  | <i>Daedalea quercina</i>              | F_Ba | 0.8988 | 53.04 | 55.57 | 8.47  | 75     | 0.1012 | 62.07 | 107.07 | 118.29 |
| aspekawa  | <i>Aspergillus kawachii</i>           | F_As | 0.8514 | 53.56 | 58.24 | 14.11 | 85.77  | 0.1486 | 67.04 | 107.24 | 105.53 |
| anthavoc  | <i>Anthostoma avocetta</i>            | F_As | 0.6635 | 54.42 | 61.1  | 17.81 | 80.23  | 0.3365 | 66.87 | 107.26 | 108.3  |
| fomimedi  | <i>Fomitopsis mediterranea</i>        | F_Ba | 0.8626 | 54.33 | 58.14 | 11.37 | 81.65  | 0.1374 | 58.07 | 107.53 | 130.02 |
| ompholea  | <i>Omphalotus olearius</i>            | F_Ba | 0.8622 | 53.14 | 55.02 | 7.45  | 68.76  | 0.1378 | 57.66 | 107.55 | 133    |
| wickanom  | <i>Wickerhamomyces anomalus</i>       | F_As | 0.484  | 53.54 | 55.18 | 6.54  | 58.1   | 0.516  | 37.45 | 107.6  | 213.92 |
| collzoys  | <i>Colletotrichum zoysiae</i>         | F_As | 0.7161 | 54.96 | 61.64 | 17.99 | 84.57  | 0.2839 | 66.77 | 107.62 | 107.59 |

|           |                                    |      |        |       |       |        |        |        |       |        |        |
|-----------|------------------------------------|------|--------|-------|-------|--------|--------|--------|-------|--------|--------|
| aspeoryz  | <i>Aspergillus oryzae</i>          | F_As | 0.7373 | 54.16 | 59.2  | 14.37  | 77.7   | 0.2627 | 48.89 | 108.23 | 160.38 |
| pycnsang  | <i>Pycnoporus sanguineus</i>       | F_Ba | 0.884  | 54.42 | 57.25 | 9.3    | 77.2   | 0.116  | 60.99 | 108.35 | 124.36 |
| exobvacc  | <i>Exobasidium vaccinii</i>        | F_Ba | 0.8693 | 70.82 | 75.2  | 16.7   | 100.61 | 0.1307 | 57.53 | 108.38 | 133.36 |
| crpvish   | <i>Cryptococcus vishniacii</i>     | F_Ba | 0.9093 | 58.42 | 61.02 | 10.22  | 81.39  | 0.0907 | 60.85 | 108.39 | 124.73 |
| melalari  | <i>Melampsora laricispopulina</i>  | F_Ba | 0.7145 | 72.24 | 77.27 | 19.18  | 93.77  | 0.2855 | 58.57 | 108.46 | 131.02 |
| coccimmi  | <i>Coccidioides immitis</i>        | F_As | 0.678  | 56.92 | 62.27 | 15.78  | 80.71  | 0.322  | 80.02 | 108.6  | 83.6   |
| thieanta  | <i>Thielavia antarctica</i>        | F_As | 0.6843 | 56.24 | 61.54 | 15.19  | 78.79  | 0.3157 | 64.79 | 108.66 | 115.15 |
| ascosarc  | <i>Ascocoryne sarcoides</i>        | F_As | 0.7351 | 49.72 | 53.41 | 10.08  | 71.89  | 0.2649 | 66.79 | 108.8  | 110.21 |
| tothfusc  | <i>Tothia fuscella</i>             | F_As | 0.7176 | 52.05 | 54.91 | 9.02   | 68.68  | 0.2824 | 70.92 | 108.81 | 101.5  |
| uncirees  | <i>Uncinocarpus reesii</i>         | F_As | 0.5736 | 56.2  | 59.32 | 11.02  | 68.47  | 0.4264 | 71.62 | 108.83 | 104.43 |
| atraspec  | <i>Atractiellales spec</i>         | F_Ba | 0.8476 | 50.07 | 52.92 | 9.1    | 70.2   | 0.1524 | 43.47 | 108.85 | 185.22 |
| exidglan  | <i>Exidia glandulosa</i>           | F_Ba | 0.8972 | 50.86 | 52.85 | 7.64   | 68.53  | 0.1028 | 49.67 | 108.88 | 159.96 |
| wallicht  | <i>Wallemia ichthyophaga</i>       | F_Ba | 0.9294 | 46.67 | 48.16 | 5.5    | 62.68  | 0.0706 | 54.72 | 108.95 | 144.59 |
| marsbrun  | <i>Marssonina brunnea</i>          | F_As | 0.4832 | 49.67 | 54.07 | 11.71  | 63.75  | 0.5168 | 65.91 | 109.16 | 113.61 |
| trichicia | <i>Trichosporon chiarellii</i>     | F_Ba | 0.4711 | 50.35 | 52.45 | 8.37   | 59.83  | 0.5289 | 70.94 | 109.41 | 102.19 |
| amorresi  | <i>Amorphaeotheca resinata</i>     | F_As | 0.7392 | 50.09 | 53.77 | 10.24  | 72.53  | 0.2608 | 71.66 | 109.68 | 100.89 |
| rhytrufu  | <i>Rhytidhysterium rufulum</i>     | F_As | 0.7012 | 51.65 | 53.9  | 7.91   | 66.18  | 0.2988 | 69.3  | 109.77 | 106.19 |
| lophmyti  | <i>Lophium mytilinum</i>           | F_As | 0.7281 | 51.13 | 54.57 | 9.9    | 71.16  | 0.2719 | 70.41 | 109.94 | 104.89 |
| meirmilt  | <i>Meira miltonrushii</i>          | F_Eu | 0.5549 | 65.36 | 67.83 | 9.77   | 73.21  | 0.4451 | 51.66 | 109.96 | 155.1  |
| mucocirc  | <i>Mucor circinelloides</i>        | F_Fu | 0.8707 | 57.65 | 59.92 | 9.02   | 75.73  | 0.1293 | 55.1  | 110.09 | 145.26 |
| leiospec  | <i>Leiotrametes sp</i>             | F_Ba | 0.8901 | 54.75 | 58.08 | 10.39  | 82.11  | 0.1099 | 67.78 | 110.24 | 113.05 |
| pisomicr  | <i>Pisolithus microcarpus</i>      | F_Ba | 0.8237 | 51.58 | 55.6  | 11.56  | 77.96  | 0.1763 | 56.31 | 110.58 | 144.17 |
| tramijub  | <i>Trametes ljubarskyi</i>         | F_Ba | 0.8895 | 54.19 | 57.11 | 9.51   | 78.44  | 0.1105 | 63.6  | 110.77 | 123.89 |
| aspeacid  | <i>Aspergillus acidus</i>          | F_As | 0.8219 | 53.69 | 59.86 | 17.14  | 90.6   | 0.1781 | 60.41 | 110.86 | 132.32 |
| neosfisc  | <i>Neosartorya fischeri</i>        | F_As | 0.8367 | 53.37 | 57.27 | 12.84  | 80.79  | 0.1633 | 77.39 | 110.93 | 96.78  |
| aspetubi  | <i>Aspergillus tubingensis</i>     | F_As | 0.8338 | 53.77 | 60.01 | 17.37  | 92.42  | 0.1662 | 60.65 | 110.96 | 132.01 |
| aspevers  | <i>Aspergillus versicolor</i>      | F_As | 0.8679 | 51.39 | 56.05 | 13.9   | 85.57  | 0.1321 | 64.36 | 111.32 | 123.73 |
| tricroces | <i>Trichoderma reesei</i>          | F_As | 0.6269 | 60.66 | 68.73 | 22.32  | 86.64  | 0.3731 | 69    | 111.32 | 111.7  |
| pilocroc  | <i>Ploderma croceum</i>            | F_Ba | 0.8133 | 54.08 | 57.23 | 10.25  | 75.11  | 0.1867 | 62.69 | 111.64 | 128.45 |
| tricollea | <i>Trichosporon oleaginosus</i>    | F_Ba | 0.7307 | 32.85 | 36.54 | 9.68   | 63.2   | 0.2693 | 70.06 | 111.74 | 110.78 |
| pisotinc  | <i>Pisolithus tinctorius</i>       | F_Ba | 0.8099 | 51.75 | 56.05 | 12.21  | 78.89  | 0.1901 | 57.72 | 111.81 | 143.3  |
| aspewent  | <i>Aspergillus wentii</i>          | F_As | 0.8477 | 50.72 | 55.14 | 13.43  | 82.19  | 0.1523 | 67.57 | 112.21 | 117.42 |
| clavspec  | <i>Clavulina spec</i>              | F_Ba | 0.8809 | 58.18 | 63.65 | 15.62  | 98.08  | 0.1191 | 59.89 | 112.45 | 137.95 |
| aspeclav  | <i>Aspergillus clavatus</i>        | F_As | 0.8788 | 55.46 | 61.32 | 16.97  | 97.77  | 0.1212 | 69.35 | 112.52 | 116.03 |
| altebras  | <i>Alternaria brassicicola</i>     | F_As | 0.5241 | 49.76 | 52.07 | 7.05   | 59.08  | 0.4759 | 62.25 | 112.88 | 132.89 |
| thieterr  | <i>Thielavia terrestris</i>        | F_As | 0.7412 | 60.96 | 68.97 | 22.3   | 95.62  | 0.2588 | 65.31 | 112.94 | 124.93 |
| metarobe  | <i>Metarhizium robertsii</i>       | F_As | 0.5889 | 57.8  | 61.83 | 13.71  | 73.92  | 0.4111 | 70.3  | 113.29 | 113.26 |
| pycnococc | <i>Pycnoporus coccineus</i>        | F_Ba | 0.8952 | 54.47 | 57.42 | 9.52   | 79.73  | 0.1048 | 66.19 | 113.52 | 124.51 |
| metaacri  | <i>Metarhizium acridum</i>         | F_As | 0.5481 | 57.7  | 61.89 | 13.97  | 72.73  | 0.4519 | 69.29 | 114.02 | 117.53 |
| hessvesei | <i>Hesseltinella vesiculosa</i>    | F_Fu | 0.9293 | 59.02 | 64.32 | 17.35  | 105.18 | 0.0707 | 68.57 | 114.1  | 120.35 |
| aspebras  | <i>Aspergillus brasiliensis</i>    | F_As | 0.8396 | 54    | 60.24 | 17.49  | 93.78  | 0.1604 | 61.63 | 114.13 | 137.7  |
| paxinivo  | <i>Paxillus involutus</i>          | F_Ba | 0.864  | 52.12 | 54.81 | 8.65   | 72.47  | 0.136  | 46.26 | 114.56 | 194.85 |
| ustimayd  | <i>Ustilago maydis</i>             | F_Ba | 0.3987 | 30.64 | 51.18 | 54.19  | 84.47  | 0.6013 | 86.21 | 114.76 | 74.97  |
| xylöheve  | <i>Xylona heveae</i>               | F_As | 0.6893 | 55.63 | 60.62 | 14.38  | 80.6   | 0.3107 | 80.71 | 114.81 | 93.19  |
| tricatro  | <i>Trichoderma atroviride</i>      | F_As | 0.7128 | 58.52 | 64.28 | 17.03  | 84.39  | 0.2872 | 64.21 | 114.93 | 133.1  |
| cladfulv  | <i>Cladosporium fulvum</i>         | F_As | 0.7137 | 51.47 | 53.89 | 7.58   | 66.07  | 0.2863 | 64.11 | 115.16 | 134.8  |
| morcconi  | <i>Morchella conica</i>            | F_As | 0.7653 | 57.2  | 63.47 | 17.63  | 89.77  | 0.2347 | 71.28 | 115.2  | 115.85 |
| pyroconf  | <i>Pyronema confluens</i>          | F_As | 0.6785 | 51.99 | 56.3  | 11.97  | 73.75  | 0.3215 | 73.65 | 115.47 | 112.08 |
| melaspec  | <i>Melanconium spec</i>            | F_As | 0.7349 | 58.2  | 68.1  | 26.09  | 100.19 | 0.2651 | 62.48 | 115.58 | 140.06 |
| tricaspe  | <i>Trichoderma asperellum</i>      | F_As | 0.7852 | 58.88 | 66.08 | 20.23  | 95.86  | 0.2148 | 65.12 | 115.67 | 132.82 |
| neurdisc  | <i>Neurospora discreta</i>         | F_As | 0.4906 | 60.83 | 66.83 | 17.65  | 76.1   | 0.5094 | 70.46 | 115.94 | 120.28 |
| polyarcu  | <i>Polyporus arcularius</i>        | F_Ba | 0.8863 | 54.02 | 56.74 | 9.1    | 76.9   | 0.1137 | 61.82 | 116.41 | 143.3  |
| backcirc  | <i>Backusella circina</i>          | F_Fu | 0.822  | 61.02 | 65.69 | 15.15  | 89.57  | 0.178  | 62.6  | 116.72 | 141.94 |
| tricharz  | <i>Trichoderma harzianum</i>       | F_As | 0.794  | 57.85 | 63.89 | 17.34  | 91.2   | 0.206  | 65.14 | 117.1  | 136.52 |
| lentigr   | <i>Lentinus tigrinus</i>           | F_Ba | 0.8826 | 54.23 | 57.21 | 9.56   | 78.79  | 0.1174 | 62.15 | 117.26 | 144.68 |
| artoeleg  | <i>Artolenzites elegans</i>        | F_Ba | 0.889  | 54.01 | 57.27 | 10.06  | 81.56  | 0.111  | 66.84 | 117.72 | 133.75 |
| tringuia  | <i>Trinosporium guianense</i>      | F_As | 0.733  | 55.33 | 61.76 | 17.49  | 87.79  | 0.267  | 79.08 | 117.82 | 107.23 |
| zymopseu  | <i>Zymoseptoria pseudotritici</i>  | F_As | 0.8002 | 53.27 | 55.93 | 8.5    | 72.59  | 0.1998 | 68.03 | 117.94 | 131.95 |
| pyretere  | <i>Pyrenophora teres</i>           | F_As | 0.8143 | 49.43 | 52.71 | 9.09   | 74.09  | 0.1857 | 63.99 | 118.37 | 143.99 |
| niesexil  | <i>Niesslia exilis</i>             | F_As | 0.8136 | 51.79 | 55.62 | 11.37  | 77.23  | 0.1864 | 62.29 | 118.63 | 147.78 |
| tulacalo  | <i>Tulasnella calospora</i>        | F_Ba | 0.852  | 57.78 | 61.31 | 11.5   | 82.38  | 0.148  | 50.7  | 118.91 | 188.79 |
| candarab  | <i>Candida arabinofementans</i>    | F_As | 0.1995 | 72.57 | 76.71 | 16.45  | 63.94  | 0.8005 | 54.76 | 118.93 | 173.2  |
| aspeflav  | <i>Aspergillus flavus</i>          | F_As | 0.5987 | 54.6  | 58.18 | 11.76  | 69.98  | 0.4013 | 64.76 | 119.01 | 142.81 |
| conispec  | <i>Coniochaeta spec</i>            | F_As | 0.7795 | 57.18 | 62.44 | 15.24  | 86.67  | 0.2205 | 66.62 | 119.23 | 138.03 |
| pendidgi  | <i>Penicillium digitatum</i>       | F_As | 0.825  | 54.08 | 57.93 | 11.68  | 81.93  | 0.175  | 78.05 | 119.71 | 111.37 |
| dekkbrux  | <i>Dekkera bruxellensis</i>        | F_As | 0.1042 | 68.96 | 72.9  | 13.92  | 42.65  | 0.8958 | 48.07 | 119.76 | 200    |
| tramvers  | <i>Trametes versicolor</i>         | F_Ba | 0.8786 | 54.2  | 56.76 | 8.75   | 75.32  | 0.1214 | 56.59 | 120.42 | 172.01 |
| fusaoxys  | <i>Fusarium oxysporum</i>          | F_As | 0.6098 | 50.56 | 52.79 | 7.58   | 64.26  | 0.3902 | 79.22 | 120.63 | 110.06 |
| fusavert  | <i>Fusarium verticillioides</i>    | F_As | 0.6271 | 50.66 | 52.8  | 7.46   | 64.7   | 0.3729 | 80.57 | 120.77 | 107    |
| botdroth  | <i>Botryosphaeria dothidea</i>     | F_As | 0.6698 | 52.68 | 55.11 | 9.03   | 68.03  | 0.3302 | 75.48 | 120.8  | 119.21 |
| triclong  | <i>Trichoderma longibrachiatum</i> | F_As | 0.716  | 59.13 | 66.74 | 20.85  | 92.09  | 0.284  | 64.66 | 120.84 | 147.9  |
| aspecarb  | <i>Aspergillus carbonarius</i>     | F_As | 0.8156 | 52.52 | 58.31 | 16.48  | 89.3   | 0.1844 | 69.07 | 121.13 | 136.55 |
| leptmacu  | <i>Leptosphaeria maculans</i>      | F_As | 0.5569 | 51.25 | 53.83 | 10.28  | 67.8   | 0.4431 | 84.92 | 121.24 | 97.1   |
| hystpuli  | <i>Hysterium pulicare</i>          | F_As | 0.7046 | 51.7  | 54.45 | 8.89   | 69.57  | 0.2954 | 75.37 | 121.33 | 120.56 |
| zymoarda  | <i>Zymoseptoria ardabiliae</i>     | F_As | 0.7908 | 53.31 | 56.06 | 8.67   | 72.74  | 0.2092 | 67.07 | 121.56 | 144.86 |
| umberama  | <i>Umbelopsis ramanniana</i>       | F_Fu | 0.929  | 65.9  | 69.89 | 12.86  | 103.05 | 0.071  | 88.02 | 122.83 | 101.27 |
| thiearen  | <i>Thielavia arenaria</i>          | F_As | 0.7703 | 58.09 | 64.68 | 18.78  | 93.27  | 0.2297 | 73.15 | 123.03 | 131.16 |
| cladgray  | <i>Cladonia grayi</i>              | F_As | 0.7027 | 51.45 | 55.24 | 10.81  | 70.85  | 0.2973 | 59.22 | 123.13 | 168.16 |
| jamispec  | <i>Jaminalia spec</i>              | F_Ba | 0.8232 | 73.09 | 76.73 | 14.46  | 96.74  | 0.1768 | 71.61 | 123.2  | 138.17 |
| dichsqua  | <i>Dichomitus squalens</i>         | F_Ba | 0.8516 | 54.66 | 58.2  | 10.8   | 81.2   | 0.1484 | 62.94 | 124.48 | 162.66 |
| stehirs   | <i>Stereum hirsutum</i>            | F_Ba | 0.8503 | 58.04 | 63.7  | 16.11  | 96.68  | 0.1497 | 64.12 | 124.93 | 159.95 |
| tillanom  | <i>Tilletiaria anomala</i>         | F_Ba | 0.863  | 71.09 | 76.45 | 18.39  | 107.39 | 0.137  | 77.24 | 126.22 | 132.54 |
| neurtetr  | <i>Neurospora tetrasperma</i>      | F_As | 0.5046 | 59.99 | 66.56 | 18.59  | 78.71  | 0.4954 | 73.01 | 126.92 | 141.45 |
| rhodminu  | <i>Rhodotorula minuta</i>          | F_Ba | 0.8979 | 62.38 | 68.64 | 17.84  | 112.68 | 0.1021 | 86.29 | 126.97 | 114.14 |
| puccgram  | <i>Puccinia graminis</i>           | F_Ba | 0.4433 | 76.38 | 81.44 | 20.15  | 86.98  | 0.5567 | 80.73 | 127.52 | 127.93 |
| pirospec  | <i>Piromyces species</i>           | F_Ne | 0.2165 | 41.03 | 105.6 | 194.83 | 92.05  | 0.7835 | 96.58 | 128.32 | 83.26  |
| histcaps  | <i>Histoplasma capsulatum</i>      | F_As | 0.3679 | 64.06 | 70.35 | 21.42  | 75.47  | 0.6321 | 81.16 | 128.48 | 129.59 |
| eutylata  | <i>Eutypa lata</i>                 | F_As | 0.4782 | 58    | 63.56 | 16.67  | 79.08  | 0.5218 | 89.56 | 128.71 | 104.66 |
| macrphas  | <i>Macrophomina phaseolina</i>     | F_As | 0.7562 | 52.06 | 55.19 | 9.41   | 74.55  | 0.2438 | 85.25 | 128.93 | 118.05 |
| ganospec  | <i>Ganoderma species</i>           | F_Ba | 0.854  | 55.17 | 59.4  | 12.44  | 87.32  | 0.146  | 69.22 | 129.64 | 158.6  |
| babjinos  | <i>Babjeviella inostivor</i>       | F_As | 0.3437 | 45.77 | 48.29 | 7.03   | 51.56  | 0.6563 | 51.19 | 130.08 | 219.25 |
| cateangu  | <i>Catenaria anguillulae</i>       | F_BI | 0.8241 | 74.12 | 77.87 | 14.91  | 98.76  | 0.1759 | 66.38 | 130.65 | 168.59 |
| vertdahl  | <i>Verticillium dahliae</i>        | F_As | 0.7165 | 54.02 | 59.81 | 15.69  | 85.54  | 0.2835 | 81.19 | 130.75 | 132.63 |
| rhizirre  | <i>Rhizoglyphus irregularis</i>    | F_GI | 0.7143 | 72.08 | 76.01 | 13.97  | 91.3   | 0.2857 | 68.35 | 131.01 | 164.65 |
| zibaverm  | <i>Sebacina vermifera</i>          | F_Ba | 0.8504 | 49.24 | 52.35 | 8.92   | 74.46  | 0.1496 | 54.85 | 131.1  | 213.08 |
| teranubi  | <i>Teratosphaeria nubulosa</i>     | F_As | 0.7557 | 53.55 | 57.14 | 10.68  | 77.58  | 0.2443 | 80.34 | 132.07 | 136.46 |

|           |                                       |      |        |        |        |        |        |        |        |        |        |
|-----------|---------------------------------------|------|--------|--------|--------|--------|--------|--------|--------|--------|--------|
| schiocto  | <i>Schizosaccharomyces octosporus</i> | F_As | 0.7788 | 45.84  | 50.06  | 13.66  | 80.17  | 0.2212 | 106.15 | 132.37 | 87.34  |
| microssp  | <i>Microsporium species</i>           | F_As | 0.7851 | 80.42  | 84.64  | 16.77  | 105.06 | 0.2149 | 80.53  | 133.33 | 142.78 |
| ascorube  | <i>Ascoidea rubescens</i>             | F_As | 0.3749 | 72.16  | 95.18  | 60.55  | 88.7   | 0.6251 | 51.76  | 133.42 | 230.96 |
| ventinae  | <i>Venturia inaequalis</i>            | F_Eu | 0.7437 | 50.77  | 52.96  | 7.21   | 69.26  | 0.2563 | 85.48  | 134.04 | 127.6  |
| orπισpec  | <i>Orpinomyces spec</i>               | F_Ne | 0.011  | 37.02  | 42.56  | 22.03  | 60.42  | 0.989  | 105.77 | 134.71 | 80.01  |
| arthholig | <i>Arthrotrichum oligospora</i>       | F_As | 0.9234 | 62.38  | 70.53  | 22.72  | 135.22 | 0.0766 | 80.82  | 136.97 | 148.48 |
| tillwash  | <i>Tilletiopsis washingtonensis</i>   | F_Ba | 0.7656 | 53.6   | 56.08  | 7.88   | 73.06  | 0.2344 | 85.81  | 136.98 | 135.22 |
| parabrase | <i>Paracoccidioides brasiliensis</i>  | F_As | 0.5685 | 65.41  | 75.8   | 29.61  | 95.12  | 0.4315 | 76.5   | 137.04 | 159.48 |
| gonaprol  | <i>Gonapodya prolifera</i>            | F_Ch | 0.807  | 61.69  | 66.42  | 14.53  | 93.21  | 0.193  | 90.83  | 137.28 | 129.51 |
| testcype  | <i>Testicularia cyperi</i>            | F_Ba | 0.2266 | 51.7   | 62.36  | 42.41  | 88.97  | 0.7734 | 98.24  | 138.88 | 110.77 |
| nadsfulv  | <i>Nadsonia fulvescens</i>            | F_As | 0.5073 | 69.09  | 79.42  | 30.3   | 93.34  | 0.4927 | 74.8   | 139.52 | 169.82 |
| ustispec  | <i>Ustilaginomycotina spec</i>        | F_Ba | 0.0419 | 51.77  | 59.94  | 31.38  | 77.78  | 0.9581 | 111.04 | 140.26 | 78.98  |
| tremmese  | <i>Tremella mesenterica</i>           | F_Ba | 0.3659 | 44.23  | 45.72  | 5.66   | 51.81  | 0.6341 | 100.96 | 141.01 | 123.45 |
| schipomb  | <i>Schizosaccharomyces pombe</i>      | F_As | 0.7779 | 44.35  | 50.93  | 18.05  | 94.06  | 0.2221 | 106.75 | 142.66 | 105.9  |
| mycoqram  | <i>Mycosphaerella graminicola</i>     | F_As | 0.6056 | 53.28  | 56.15  | 8.76   | 69.89  | 0.3944 | 83.67  | 143.36 | 156.66 |
| acrestri  | <i>Acremonium strictum</i>            | F_As | 0.8681 | 53.85  | 58.38  | 12.85  | 93.34  | 0.1319 | 81.34  | 144.04 | 164.45 |
| cronquer  | <i>Cronartium quercuum</i>            | F_Ba | 0.9013 | 75.54  | 84.92  | 28.23  | 144.35 | 0.0987 | 68.97  | 144.99 | 200.81 |
| collsome  | <i>Colletotrichum somersetensis</i>   | F_As | 0.8195 | 54.85  | 62.51  | 20.36  | 108.86 | 0.1805 | 87.59  | 146    | 154.15 |
| collsubl  | <i>Colletotrichum sublineola</i>      | F_As | 0.8249 | 54.67  | 62.2   | 19.98  | 109.02 | 0.1751 | 86.09  | 146.33 | 158.63 |
| protinou  | <i>Protomyces inouyei</i>             | F_As | 0.7591 | 39.55  | 44.62  | 13.31  | 88.97  | 0.2409 | 101.59 | 149    | 126.54 |
| pseuelat  | <i>Pseudographis elatina</i>          | F_As | 0.622  | 51.93  | 55.19  | 9.93   | 74.73  | 0.378  | 96.12  | 150.36 | 142.82 |
| pyretrit  | <i>Pyrenophora tritici</i>            | F_As | 0.6564 | 49.46  | 52.37  | 8.38   | 68.6   | 0.3436 | 86.68  | 151.5  | 170.8  |
| valelaxa  | <i>Valetoniopsis laxa</i>             | F_As | 0.8541 | 59.41  | 66.97  | 21.1   | 114.48 | 0.1459 | 84.21  | 151.81 | 177.35 |
| bottrine  | <i>Botrytis cinerea</i>               | F_As | 0.4763 | 51.6   | 55.51  | 11.21  | 69.64  | 0.5237 | 102.4  | 156.16 | 150.51 |
| batrdend  | <i>Batrachochytrium dendrobatidis</i> | F_Ch | 0.7552 | 77.33  | 84.8   | 26.14  | 116.92 | 0.2448 | 94.1   | 157.85 | 170.73 |
| spatflav  | <i>Spathularia flavida</i>            | F_As | 0.6594 | 52.02  | 55.97  | 11.44  | 80.88  | 0.3406 | 103.11 | 159.63 | 149.58 |
| vertalfa  | <i>Verticillium alfalfae</i>          | F_As | 0.6653 | 53.93  | 60.7   | 17.93  | 91.62  | 0.3347 | 97.27  | 160.27 | 168.48 |
| daldesch  | <i>Daldinia eschscholzii</i>          | F_As | 0.6721 | 55.65  | 63.75  | 21.59  | 96.1   | 0.3279 | 86.05  | 160.98 | 196.55 |
| rhodgram  | <i>Rhodotorula graminis</i>           | F_Ba | 0.8819 | 68.16  | 75.39  | 20.2   | 125.32 | 0.1181 | 74.59  | 162.47 | 235.43 |
| magngris  | <i>Magnaporthe grisea</i>             | F_As | 0.6886 | 73.86  | 80.49  | 24.98  | 108.84 | 0.3114 | 114.68 | 163.31 | 144.67 |
| thelster  | <i>Thelebolus stercorius</i>          | F_As | 0.6075 | 51.17  | 54.9   | 10.46  | 76.57  | 0.3925 | 99.54  | 164.75 | 171.46 |
| hypospec  | <i>Hypoxylon species</i>              | F_As | 0.62   | 55.28  | 62.52  | 19.42  | 89.39  | 0.38   | 84.78  | 170.03 | 224.29 |
| sclescle  | <i>Sclerotinia sclerotiorum</i>       | F_As | 0.5144 | 50.7   | 56.26  | 14.7   | 79.33  | 0.4856 | 121.33 | 174.61 | 159.73 |
| grosclav  | <i>Grosmannia clavigera</i>           | F_As | 0.7268 | 59.83  | 64.24  | 15.31  | 90.41  | 0.2732 | 104.89 | 177.84 | 192.94 |
| spatpass  | <i>Spathaspora passalidarum</i>       | F_As | 0.121  | 55.01  | 57.62  | 9.19   | 49.21  | 0.879  | 42.79  | 178.59 | 464.44 |
| ophipice  | <i>Ophiostoma piceae</i>              | F_As | 0.7388 | 58.14  | 64.33  | 18.33  | 99.16  | 0.2612 | 112.37 | 186.06 | 198.46 |
| sporrel   | <i>Sporisorium reilianum</i>          | F_Ba | 0.7682 | 79.02  | 83.39  | 17.33  | 109.67 | 0.2318 | 116.65 | 186.81 | 191.03 |
| microspec | <i>Microstromatales spec</i>          | F_Ba | 0.6651 | 75.96  | 129.1  | 140.93 | 193.43 | 0.3349 | 181.87 | 188.13 | 24.88  |
| neurcras  | <i>Neurospora crassa</i>              | F_As | 0.79   | 60.25  | 69.89  | 25.8   | 132.07 | 0.21   | 139.37 | 199.21 | 171.82 |
| monahapt  | <i>Monacrosporium haptotylum</i>      | F_As | 0.9059 | 61.21  | 67.66  | 18.71  | 123.75 | 0.0941 | 86.83  | 199.84 | 309.47 |
| chaeglob  | <i>Chaetomium globosum</i>            | F_As | 0.7113 | 55.63  | 67.32  | 30.99  | 140.05 | 0.2887 | 149.3  | 211.22 | 175.52 |
| mortelon  | <i>Mortierella elongata</i>           | F_Fu | 0.6618 | 100.79 | 110.61 | 28.48  | 142.87 | 0.3382 | 122.34 | 224.31 | 268.3  |
| ramibrev  | <i>Ramicandelaber brevisporus</i>     | F_Fu | 0.8415 | 47.05  | 117.71 | 193.52 | 401.2  | 0.1585 | 187.91 | 240.77 | 177.57 |
| calopolu  | <i>Calosphaeria pulchella</i>         | F_As | 0.8689 | 58.39  | 70.76  | 32.44  | 201.81 | 0.1311 | 200.9  | 278.58 | 222.15 |
| neofparv  | <i>Neofusicoccum parvum</i>           | F_As | 0.8145 | 51.62  | 57.92  | 16.53  | 146.23 | 0.1855 | 233.16 | 283.73 | 201.09 |
| phaealeo  | <i>Phaeoacremonium aleophilum</i>     | F_As | 0.8887 | 52.89  | 59.61  | 17.63  | 171.75 | 0.1113 | 241.76 | 296.2  | 216.52 |
| pseuanta  | <i>Pseudozyma antarctica</i>          | F_Ba | 0.6865 | 75.64  | 82.57  | 26.8   | 139.44 | 0.3135 | 244.67 | 312.85 | 224.18 |
| ophipili  | <i>Ophiostoma piliferum</i>           | F_As | 0.8971 | 55.65  | 66.05  | 27.29  | 216.48 | 0.1029 | 241.03 | 321.08 | 246.28 |
| pseuhube  | <i>Pseudozyma hubeiensis</i>          | F_Ba | 0.4182 | 85.01  | 92.44  | 23.39  | 135.87 | 0.5818 | 260.11 | 448.11 | 496.78 |
| martpter  | <i>Martensiomycetes pterosporus</i>   | F_Fu | 0.7014 | 101.39 | 123.21 | 86.69  | 262.04 | 0.2986 | 357.41 | 502.83 | 426.96 |
| pichmemb  | <i>Pichia membranifaciens</i>         | F_As | 0.8583 | 64.54  | 97.76  | 90.63  | 387.02 | 0.1417 | 370.02 | 528.35 | 417.65 |
| coemreva  | <i>Coemansia reversa</i>              | F_Fu | 0.7717 | 109.07 | 132.73 | 94.11  | 327.52 | 0.2283 | 381.66 | 551.06 | 444.41 |

(F) Plant two components

| Specid    | Species                             | TaxonID | a1     | mode1  | median1 | width1 | boder1 | a2     | mode2  | median2 | width2 |
|-----------|-------------------------------------|---------|--------|--------|---------|--------|--------|--------|--------|---------|--------|
| galdsulp  | <i>Galdieria sulphuraria</i>        | P_Ba    | 0.9315 | 49.53  | 51.19   | 6.61   | 63.97  | 0.0685 | 43.14  | 63.36   | 53.12  |
| selamoel  | <i>Selaginella moellendorffii</i>   | P_St    | 0.653  | 53.12  | 55.74   | 10.16  | 65.71  | 0.347  | 56.21  | 100.62  | 116.84 |
| ostrluci  | <i>Ostreococcus lucimarinus</i>     | P_Ch    | 0.1521 | 49.13  | 50.54   | 5.47   | 51.33  | 0.8479 | 81.42  | 125.47  | 119.69 |
| micrpusi  | <i>Micromonas pusilla</i>           | P_Ch    | 0.6204 | 84.98  | 131.79  | 126.79 | 180.06 | 0.3796 | 167.24 | 177.54  | 40.97  |
| arabrylra | <i>Arabidopsis lyrata</i>           | P_Eu    | 0.5307 | 84.91  | 89.9    | 17.85  | 104.18 | 0.4693 | 108.97 | 190.51  | 216.45 |
| brasnapu  | <i>Brassica napus</i>               | P_Eu    | 0.5786 | 81.44  | 85.89   | 17.66  | 105.47 | 0.4214 | 112.5  | 204.21  | 241.32 |
| brasoler  | <i>Brassica oleracea</i>            | P_Eu    | 0.577  | 81.67  | 86.17   | 17.9   | 106.36 | 0.423  | 115.48 | 208.94  | 245.75 |
| brasrapa  | <i>Brassica rapa</i>                | P_Eu    | 0.6106 | 81.37  | 85.8    | 17.55  | 106.15 | 0.3894 | 117.52 | 210.1   | 243.24 |
| arabthl   | <i>Arabidopsis thaliana</i>         | P_Eu    | 0.6249 | 84.66  | 89.72   | 18.35  | 115.64 | 0.3751 | 148.73 | 215.45  | 186.42 |
| camestati | <i>Camelina sativa</i>              | P_Eu    | 0.5566 | 87.72  | 92.48   | 18.54  | 113.06 | 0.4434 | 125.1  | 216.81  | 240.78 |
| eutrsals  | <i>Eutrema salsugineum</i>          | P_Eu    | 0.581  | 87.15  | 92.83   | 19.9   | 114.57 | 0.419  | 138.31 | 216.93  | 217.66 |
| boecstri  | <i>Boechera stricta</i>             | P_Eu    | 0.5421 | 85.9   | 91.45   | 19.15  | 110.73 | 0.4579 | 130.13 | 218.84  | 237.27 |
| arabhall  | <i>Arabidopsis halleri</i>          | P_Eu    | 0.5885 | 84.94  | 90.32   | 18.73  | 113.36 | 0.4115 | 136.14 | 219.32  | 222.54 |
| capsrube  | <i>Capsella rubella</i>             | P_Eu    | 0.6138 | 86.53  | 92.39   | 20.02  | 118.59 | 0.3862 | 149.36 | 224.38  | 209.96 |
| capsgran  | <i>Capsella grandiflora</i>         | P_Eu    | 0.6236 | 86.46  | 92.22   | 19.8   | 119.64 | 0.3764 | 149.45 | 225.61  | 209.45 |
| physpate  | <i>Physcomitrella patens</i>        | P_Fu    | 0.704  | 146.17 | 198.68  | 139.85 | 290.51 | 0.296  | 170.86 | 250.93  | 232.86 |
| chlolvari | <i>Chlorella variabilis_NC64A</i>   | P_Ch    | 0.9064 | 147.11 | 166.54  | 77.27  | 293.23 | 0.0936 | 134.17 | 265.36  | 344.1  |
| maludome  | <i>Malus domestica</i>              | P_Eu    | 0.2472 | 90.72  | 98.49   | 25.5   | 103.18 | 0.7528 | 125.27 | 276.84  | 399.84 |
| linuosit  | <i>Linum usitatissimum</i>          | P_Eu    | 0.5514 | 86.24  | 92.21   | 20.68  | 120.2  | 0.4486 | 161.07 | 279.63  | 312.81 |
| mononegl  | <i>Monoraphidium neglectum</i>      | P_Ch    | 0.6596 | 223.35 | 247.27  | 95.15  | 294.87 | 0.3404 | 182.1  | 281.19  | 273.16 |
| marcpoly  | <i>Marchantia polymorpha</i>        | P_Ma    | 0.7999 | 143.64 | 220.06  | 200.81 | 429.97 | 0.2001 | 199.58 | 281.91  | 248.69 |
| panivirg  | <i>Panicum virgatum</i>             | P_Mo    | 0.3795 | 86.71  | 93.72   | 24.05  | 107.8  | 0.6205 | 120.12 | 298.09  | 472.88 |
| tarehass  | <i>Tarenaya hassleriana</i>         | P_Eu    | 0.5314 | 88.93  | 97.95   | 28.22  | 138.66 | 0.4686 | 191.67 | 299.61  | 290.75 |
| kalamarn  | <i>Kalanchoe mamieriana</i>         | P_Eu    | 0.5327 | 84.56  | 94.52   | 28.55  | 134.29 | 0.4673 | 184.81 | 314.99  | 348.98 |
| astespec  | <i>Asterochloris spec_Cgr/DA1ph</i> | P_Ch    | 0.2005 | 75.21  | 92.87   | 46.54  | 134.7  | 0.7995 | 250.37 | 319.35  | 226.72 |
| kalalaxi  | <i>Kalanchoe laxiflora</i>          | P_Eu    | 0.5138 | 84.66  | 94.48   | 28.38  | 132.57 | 0.4862 | 182.13 | 323.48  | 374.82 |
| chlarein  | <i>Chlamydomonas reinhardtii</i>    | P_Ch    | 0.821  | 171.55 | 205.78  | 124.18 | 353.23 | 0.179  | 265.65 | 345.89  | 211.79 |
| volvcart  | <i>Volvox carteri</i>               | P_Ch    | 0.1383 | 71.58  | 117.56  | 155.45 | 141.14 | 0.8617 | 285.33 | 363.06  | 275.41 |
| caripapa  | <i>Carica papaya</i>                | P_Eu    | 0.348  | 88.44  | 98.16   | 29.62  | 119.65 | 0.652  | 168.81 | 366.83  | 519.51 |
| gossraim  | <i>Gossypium raimondii</i>          | P_Eu    | 0.4633 | 86.12  | 95.85   | 28.31  | 131.42 | 0.5367 | 204.99 | 369.48  | 439.35 |
| ricicom   | <i>Ricinus communis</i>             | P_Eu    | 0.4107 | 89.14  | 99.13   | 30.37  | 129.92 | 0.5893 | 200.96 | 370.37  | 450.1  |
| citrsine  | <i>Citrus sinensis</i>              | P_Eu    | 0.4274 | 90.38  | 101.45  | 32.51  | 135.26 | 0.5726 | 218.33 | 371.35  | 420.55 |
| zea_mays  | <i>Zea mays</i>                     | P_Mo    | 0.393  | 86.34  | 94.39   | 25.96  | 117.54 | 0.607  | 149.21 | 374.84  | 606.26 |
| pyrubret  | <i>Pyrus bretschneideri</i>         | P_Eu    | 0.4459 | 91.18  | 104.48  | 37.21  | 148.77 | 0.5541 | 201.89 | 376.83  | 459.32 |
| panihall  | <i>Panicum hallii</i>               | P_Mo    | 0.4537 | 87.03  | 95.76   | 27.36  | 125.55 | 0.5463 | 187.38 | 378.87  | 504.03 |
| prunpers  | <i>Prunus persica</i>               | P_Eu    | 0.4808 | 91.11  | 105.81  | 40.34  | 156.06 | 0.5192 | 228.55 | 379.95  | 414.61 |
| poputric  | <i>Populus trichocarp</i>           | P_Eu    | 0.4079 | 89.62  | 100.47  | 31.9   | 132.59 | 0.5921 | 212.82 | 383.06  | 457.54 |
| fragvesc  | <i>Fragaria vesca</i>               | P_Eu    | 0.4542 | 89.01  | 99.86   | 30.84  | 137.56 | 0.5458 | 194.96 | 383.97  | 496.11 |
| aracdura  | <i>Arachis duranensis</i>           | P_Eu    | 0.3964 | 87.59  | 97.5    | 29.43  | 132.36 | 0.6036 | 196.63 | 390.39  | 508.38 |
| meditrun  | <i>Medicago truncatula</i>          | P_Eu    | 0.3376 | 89.08  | 97.85   | 27.48  | 120.28 | 0.6624 | 198.21 | 391.52  | 509.49 |
| mimugutt  | <i>Mimulus guttatus</i>             | P_Eu    | 0.5544 | 89.09  | 99.17   | 30.02  | 148.47 | 0.4456 | 253.39 | 393.81  | 401.86 |

|           |                                       |      |        |        |        |       |        |        |         |         |         |
|-----------|---------------------------------------|------|--------|--------|--------|-------|--------|--------|---------|---------|---------|
| setaital  | <i>Setaria italica</i>                | P_Mo | 0.4771 | 86.71  | 95.94  | 27.95 | 130.48 | 0.5229 | 207.35  | 399.9   | 511.15  |
| citrclcm  | <i>Citrus clementina</i>              | P_Eu | 0.449  | 90.27  | 102.83 | 35.68 | 145.72 | 0.551  | 249.07  | 400.28  | 429.29  |
| erytgu    | <i>Erythranthe guttata</i>            | P_Eu | 0.5524 | 89.29  | 99.06  | 29.59 | 152.26 | 0.4476 | 242.46  | 404.68  | 434.65  |
| zostmari  | <i>Zostera marina</i>                 | P_Mo | 0.5985 | 81.32  | 89.88  | 26.76 | 136.52 | 0.4015 | 168.08  | 405.54  | 646.62  |
| sarrpurp  | <i>Sarracenia purpurea</i>            | P_Eu | 0.4234 | 88.69  | 100.37 | 33.19 | 139.51 | 0.5766 | 224.82  | 410.83  | 495.53  |
| salipurp  | <i>Salix purpurea</i>                 | P_Eu | 0.4242 | 88.7   | 100.37 | 33.2  | 139.98 | 0.5758 | 225.46  | 411.69  | 495.77  |
| setaviri  | <i>Setaria viridis</i>                | P_Mo | 0.4699 | 86.67  | 96.17  | 28.56 | 131.75 | 0.5301 | 213.22  | 413.74  | 531.77  |
| orophom   | <i>Oropetium thomaeum</i>             | P_Mo | 0.4276 | 86.21  | 96.79  | 30.98 | 133.9  | 0.5724 | 215.08  | 419.03  | 537.6   |
| eucagran  | <i>Eucalyptus grandis</i>             | P_Eu | 0.3847 | 88.58  | 101.31 | 35.85 | 136.29 | 0.6153 | 229.79  | 419.65  | 511.06  |
| prunmume  | <i>Prunus mume</i>                    | P_Eu | 0.5095 | 91.04  | 107.31 | 43.98 | 177.59 | 0.4905 | 251.81  | 422.33  | 455.15  |
| morunota  | <i>Morus notabilis</i>                | P_Eu | 0.3879 | 92.18  | 106.71 | 40.13 | 152.85 | 0.6121 | 232.13  | 422.41  | 501.54  |
| oryzsati  | <i>Oryza sativa</i>                   | P_Mo | 0.4481 | 85.42  | 95.79  | 30.33 | 137.21 | 0.5519 | 238.3   | 431.63  | 516.74  |
| glycmax   | <i>Glycine max</i>                    | P_Eu | 0.365  | 88.75  | 99.99  | 32.68 | 132.34 | 0.635  | 220.86  | 437.22  | 570.01  |
| anancom   | <i>Ananas comosus</i>                 | P_Mo | 0.2432 | 88.76  | 96.55  | 25.62 | 109.74 | 0.7568 | 186.31  | 442.21  | 672.97  |
| ucusati   | <i>Cucumis sativus</i>                | P_Eu | 0.4175 | 87.04  | 98.97  | 33.2  | 141.79 | 0.5825 | 237.89  | 447.77  | 555.74  |
| bracstac  | <i>Brachypodium stacei</i>            | P_Mo | 0.4915 | 86.51  | 96.94  | 30.58 | 140.68 | 0.5085 | 238.41  | 454.66  | 575.22  |
| salvmilt  | <i>Salvia milt</i>                    | P_Eu | 0.5383 | 80.12  | 90.21  | 28.77 | 150.34 | 0.4617 | 272.66  | 457.62  | 499.5   |
| zizijuju  | <i>Ziziphus jujuba</i>                | P_Eu | 0.4689 | 92.63  | 111.35 | 50.24 | 185.38 | 0.5311 | 266.62  | 465.93  | 527.73  |
| popueuph  | <i>Populus euphratica</i>             | P_Eu | 0.4521 | 89.11  | 103.1  | 38.4  | 162.42 | 0.5479 | 263.18  | 466.57  | 540.06  |
| bracdist  | <i>Brachypodium distachyon</i>        | P_Mo | 0.4981 | 86.25  | 96.83  | 30.88 | 143.95 | 0.5019 | 246.87  | 467.11  | 585.16  |
| sorgbico  | <i>Sorghum bicolor</i>                | P_Mo | 0.5027 | 87.16  | 98.81  | 33.26 | 149.57 | 0.4973 | 228.65  | 471.16  | 636.24  |
| tritaest  | <i>Triticum aestivum</i>              | P_Mo | 0.5863 | 85.67  | 97.81  | 33.76 | 177.06 | 0.4137 | 292.56  | 482.18  | 510.23  |
| phasvulg  | <i>Phaseolus vulgaris</i>             | P_Eu | 0.4226 | 86.29  | 99.86  | 36.75 | 153.13 | 0.5774 | 248.21  | 484.42  | 620.51  |
| maniescu  | <i>Manihot esculenta</i>              | P_Eu | 0.4699 | 86.59  | 99.42  | 35.15 | 155.16 | 0.5301 | 250.71  | 485.29  | 617.35  |
| trifprat  | <i>Trifolium pratense</i>             | P_Eu | 0.3912 | 88.83  | 101.65 | 35.64 | 150.4  | 0.6088 | 250.12  | 490.71  | 631.29  |
| theocaca  | <i>Theobroma cacao</i>                | P_Eu | 0.4321 | 89.45  | 102.13 | 35.92 | 159.66 | 0.5679 | 238.11  | 492.61  | 672.56  |
| aquicoer  | <i>Aquilegia coerulea</i>             | P_Eu | 0.4527 | 89.07  | 101.34 | 34.19 | 149.87 | 0.5473 | 256.76  | 500.41  | 644.37  |
| cicearie  | <i>Cicer arietinum</i>                | P_Eu | 0.4111 | 88.34  | 102.06 | 37.51 | 165    | 0.5889 | 278.02  | 507.86  | 604.36  |
| vignradi  | <i>Vigna radiata</i>                  | P_Eu | 0.4696 | 85.6   | 100.28 | 39.31 | 171.3  | 0.5304 | 256.03  | 508.26  | 661.97  |
| jatrcurc  | <i>Jatropha curcas</i>                | P_Eu | 0.4774 | 87.28  | 102.3  | 40.29 | 178.94 | 0.5226 | 287.86  | 517.42  | 605.46  |
| oryzbrac  | <i>Oryza brachyantha</i>              | P_Mo | 0.5136 | 85.46  | 97.84  | 34.37 | 173.62 | 0.4864 | 297.75  | 528.98  | 610.01  |
| cucumelo  | <i>Cucumis melo</i>                   | P_Eu | 0.4362 | 87.09  | 100.85 | 37.5  | 166.72 | 0.5638 | 263.97  | 539.49  | 724.27  |
| daucarro  | <i>Daucus carota</i>                  | P_Eu | 0.4958 | 84.67  | 100.35 | 41.59 | 188.17 | 0.5042 | 325.44  | 560.66  | 630.03  |
| sesaindi  | <i>Sesamum indicum</i>                | P_Eu | 0.4917 | 85.82  | 104.31 | 48.63 | 206.41 | 0.5083 | 340.59  | 564.89  | 604.75  |
| citrlana  | <i>Citrus lanatus</i>                 | P_Eu | 0.477  | 87.31  | 104.29 | 44.95 | 202.26 | 0.523  | 343.05  | 614.86  | 717.65  |
| vitivini  | <i>Vitis vinifera</i>                 | P_Eu | 0.4241 | 90.1   | 101.28 | 36.26 | 149.99 | 0.5759 | 224.02  | 635.95  | 1139.35 |
| spiripoly | <i>Spirodela polyrhiza</i>            | P_Mo | 0.5103 | 85.58  | 100.7  | 40.81 | 182.13 | 0.4897 | 333.62  | 642.05  | 816.46  |
| solapenn  | <i>Solanum pennellii</i>              | P_Eu | 0.4443 | 83.97  | 99.22  | 40.5  | 183.79 | 0.5557 | 328.6   | 664.53  | 881.04  |
| solatube  | <i>Solanum tuberosum</i>              | P_Eu | 0.4534 | 84.2   | 101.53 | 45.58 | 205.3  | 0.5466 | 375.82  | 682.39  | 810.44  |
| nicotome  | <i>Nicotiana tomentosiformis</i>      | P_Eu | 0.4025 | 86.54  | 101.71 | 40.82 | 176.96 | 0.5975 | 331.85  | 698.91  | 963.17  |
| chenquin  | <i>Chenopodium quinoa</i>             | P_Eu | 0.4599 | 87.62  | 105.21 | 46.52 | 200.36 | 0.5401 | 355.29  | 708.38  | 926.83  |
| nicosylv  | <i>Nicotiana sylvestris</i>           | P_Eu | 0.3971 | 86.28  | 101.45 | 40.76 | 175.38 | 0.6029 | 333.18  | 717.62  | 1009.22 |
| betavulg  | <i>Beta vulgaris</i>                  | P_Eu | 0.3673 | 87.91  | 101.7  | 37.39 | 158.81 | 0.6327 | 315.82  | 750.54  | 1144.51 |
| amarhyop  | <i>Amaranthus hypochondriacus</i>     | P_Eu | 0.3788 | 84.91  | 98.02  | 35.19 | 169.89 | 0.6212 | 408.35  | 776.81  | 974.78  |
| ambotric  | <i>Amborella trichopoda</i>           | P_Am | 0.3376 | 94.47  | 116.52 | 59.09 | 183.92 | 0.6624 | 269.51  | 842.39  | 1606.72 |
| auxepret  | <i>Auxenochlorella protothecoides</i> | P_Ch | 0.9356 | 155.21 | 178.36 | 92.05 | 472.48 | 0.0644 | 647.07  | 846.35  | 581.54  |
| musaacur  | <i>Musa acuminata</i>                 | P_Mo | 0.4944 | 81.63  | 99.63  | 47.22 | 243.07 | 0.5056 | 519.62  | 930.09  | 1097.06 |
| phoedact  | <i>Phoenix dactylifera</i>            | P_Mo | 0.5128 | 85.88  | 111.75 | 68.37 | 337.14 | 0.4872 | 664.08  | 1389.78 | 1903.97 |
| nelunuci  | <i>Nelumbo nucifera</i>               | P_Eu | 0.4668 | 90.81  | 113.39 | 59.32 | 260.94 | 0.5332 | 398.24  | 1392.1  | 2922.38 |
| elaeguin  | <i>Elaeis guineensis</i>              | P_Mo | 0.4879 | 86.33  | 110.66 | 64.02 | 314.03 | 0.5121 | 593.41  | 1423.45 | 2198.59 |
| dunasali  | <i>Dunaliella salina</i>              | P_Ch | 0.4483 | 180.32 | 353.92 | 455.3 | 810.23 | 0.5517 | 1121.52 | 1650.07 | 1554.88 |

### (G) Protist two components

| Specid    | Species                               | TaxonID | a1     | mode1 | median1 | width1 | boder1 | a2     | mode2  | median2 | width2 |
|-----------|---------------------------------------|---------|--------|-------|---------|--------|--------|--------|--------|---------|--------|
| blasspec  | <i>Blastocystis sp</i>                | O_St    | 0.8734 | 29.35 | 30.32   | 2.58   | 34.65  | 0.1266 | 27.23  | 28.35   | 4.45   |
| paratre   | <i>Paramoecium tetraurelia</i>        | O_AI    | 0.743  | 23.41 | 24.6    | 3.57   | 37.23  | 0.257  | 41.74  | 43.69   | 7.37   |
| sarrpara  | <i>Saprolegnia parasitica</i>         | O_St    | 0.8905 | 46.51 | 48.2    | 6.69   | 58.84  | 0.1095 | 31.49  | 59.9    | 79.64  |
| blashomi  | <i>Blastocystis hominis</i>           | O_St    | 0.8311 | 30.07 | 30.84   | 2.78   | 35.49  | 0.1689 | 18.73  | 70.77   | 247.43 |
| theianni  | <i>Theileria annulata</i>             | O_AI    | 0.3768 | 29.64 | 30.67   | 2.99   | 34.9   | 0.6232 | 50.43  | 70.85   | 55.78  |
| plasbras  | <i>Plasmodiophora brassicae</i>       | O_Rh    | 0.969  | 54.28 | 56.18   | 7.57   | 75.32  | 0.031  | 41.29  | 74      | 91.28  |
| entadis   | <i>Entamoeba dispar</i>               | O_Am    | 0.532  | 51.02 | 53.43   | 9.56   | 59.04  | 0.468  | 57.2   | 84.82   | 76.33  |
| pythvexa  | <i>Pythium vexans</i>                 | O_St    | 0.6242 | 69    | 71.92   | 11.43  | 77.87  | 0.3758 | 46.37  | 87.73   | 108.5  |
| phytsoja  | <i>Phytophthora sojae</i>             | O_St    | 0.3391 | 72.14 | 75.12   | 11.88  | 69.9   | 0.6609 | 46.58  | 87.96   | 108.55 |
| theiparv  | <i>Theileria parva</i>                | O_AI    | 0.3104 | 29.88 | 30.9    | 3.05   | 35.66  | 0.6896 | 59.33  | 88.11   | 77.4   |
| theiequi  | <i>Theileria equi</i>                 | O_AI    | 0.7237 | 33.88 | 34.68   | 2.86   | 39.84  | 0.2763 | 42.81  | 88.12   | 122.16 |
| pythapha  | <i>Pythium aphanidermatum</i>         | O_St    | 0.5712 | 61.76 | 63.89   | 8.46   | 67.63  | 0.4288 | 35.89  | 88.77   | 146.7  |
| retifilo  | <i>Reticulomyxa filosa</i>            | O_Rh    | 0.1954 | 26.36 | 29.05   | 10.7   | 39.39  | 0.8046 | 76.08  | 90.37   | 53.76  |
| entainva  | <i>Entamoeba invadens</i>             | O_Am    | 0.2113 | 44.38 | 47      | 10.42  | 47.5   | 0.7887 | 64.99  | 90.52   | 74.1   |
| babebige  | <i>Babesia bigemina</i>               | O_AI    | 0.683  | 35.74 | 36.69   | 3.1    | 42.2   | 0.317  | 56.04  | 92.93   | 99.32  |
| sapridcl  | <i>Saprolegnia diclina</i>            | O_St    | 0.9525 | 45.44 | 46.99   | 6.17   | 62.44  | 0.0475 | 38.09  | 92.94   | 163.3  |
| phytramo  | <i>Phytophthora ramorum</i>           | O_St    | 0.4463 | 67.92 | 70.85   | 11.65  | 71.63  | 0.5537 | 47.26  | 93.28   | 121.13 |
| phytinf   | <i>Phytophthora infestans</i>         | O_St    | 0.4102 | 65.02 | 68.11   | 12.32  | 68.94  | 0.5898 | 52.88  | 94.28   | 110.91 |
| aphainva  | <i>Aphanomyces invadans</i>           | O_St    | 0.8762 | 48.77 | 51.63   | 10.02  | 71.32  | 0.1238 | 60.58  | 94.36   | 89.11  |
| acancast  | <i>Acanthamoeba castellanii</i>       | O_Am    | 0.076  | 30.28 | 57.79   | 73.75  | 63.88  | 0.924  | 80.73  | 94.45   | 39.52  |
| phaetric  | <i>Phaeodactylum tricornutum</i>      | O_St    | 0.264  | 34    | 69.99   | 96.6   | 74.79  | 0.736  | 75.02  | 94.74   | 52.75  |
| pythirre  | <i>Pythium irregulare</i>             | O_St    | 0.6586 | 87.16 | 91.96   | 19.08  | 101.64 | 0.3414 | 55.55  | 97.59   | 111.13 |
| thalpseb  | <i>Thalassiosira pseudonana</i>       | O_St    | 0.5237 | 81.6  | 88.61   | 20.39  | 91.73  | 0.4763 | 56.78  | 98.65   | 110.76 |
| theiorie  | <i>Theileria orientalis</i>           | O_AI    | 0.3634 | 29.92 | 32      | 5.52   | 41.39  | 0.6366 | 67.96  | 99.5    | 88.56  |
| pythulti  | <i>Pythium ultimum</i>                | O_St    | 0.7211 | 80.39 | 84.57   | 16.64  | 97.44  | 0.2789 | 47.34  | 99.99   | 138.72 |
| entahist  | <i>Entamoeba histolytica</i>          | O_Am    | 0.7755 | 50.61 | 54.54   | 12.31  | 73.78  | 0.2245 | 69.44  | 100.17  | 84.65  |
| aplakerg  | <i>Aplanochytrium kerguelense</i>     | O_St    | 0.9436 | 50.76 | 52.93   | 7.47   | 73.66  | 0.0564 | 56.76  | 100.56  | 116.13 |
| babebovi  | <i>Babesia bovis</i>                  | O_AI    | 0.7474 | 34.58 | 35.25   | 2.41   | 41.14  | 0.2526 | 63.69  | 101.19  | 100.21 |
| albugand  | <i>Albugo candida</i>                 | O_St    | 0.7729 | 52.43 | 54.4    | 7.84   | 64.97  | 0.2271 | 50.64  | 102.32  | 136.52 |
| cryptmuri | <i>Cryptosporidium muris</i>          | O_AI    | 0.7413 | 61.39 | 69.04   | 21.38  | 94.55  | 0.2587 | 72.73  | 109.37  | 99.41  |
| dictdisc  | <i>Dictyostelium discoideum</i>       | O_Am    | 0.0906 | 48.06 | 60.21   | 38.62  | 73.01  | 0.9094 | 84.88  | 109.99  | 66.19  |
| pytharrh  | <i>Pythium arrhenomanes</i>           | O_St    | 0.416  | 68.31 | 70.84   | 10.03  | 72.71  | 0.584  | 65.92  | 110.01  | 118.9  |
| entannut  | <i>Entamoeba nuttalli</i>             | O_Am    | 0.8464 | 50.51 | 54.82   | 12.81  | 82.86  | 0.1536 | 78.65  | 110.89  | 88.53  |
| phytpara  | <i>Phytophthora parasitica</i>        | O_St    | 0.7664 | 65.3  | 68.24   | 11.71  | 82.14  | 0.2336 | 57.44  | 112.03  | 143.81 |
| babeequi  | <i>Babesia equi</i>                   | O_AI    | 0.7245 | 33.9  | 34.8    | 3.02   | 42.53  | 0.2755 | 54.37  | 114     | 164.81 |
| naeggrub  | <i>Naegleria gruberi</i>              | O_He    | 0.4644 | 43.42 | 46.32   | 8.74   | 54.27  | 0.5356 | 56.85  | 115.75  | 157.98 |
| monobrev  | <i>Monosiga brevicollis</i>           | O_Op    | 0.0754 | 57.14 | 70.09   | 47.49  | 76.97  | 0.9246 | 91.31  | 116.12  | 65.06  |
| hyalarab  | <i>Hyaloperonospora arabidopsidis</i> | O_St    | 0.3279 | 75.97 | 80.3    | 17.23  | 78.64  | 0.6721 | 72.73  | 116.88  | 117.1  |
| phytcaps  | <i>Phytophthora capsici</i>           | O_St    | 0.9219 | 64.13 | 66.85   | 10.82  | 89.89  | 0.0781 | 70.01  | 118.24  | 127.89 |
| thalocea  | <i>Thalassiosira oceanica</i>         | O_St    | 0.3007 | 70.17 | 73.83   | 14.57  | 75.12  | 0.6993 | 76.8   | 121.96  | 118.46 |
| plavinc   | <i>Plasmodium vinckei</i>             | O_AI    | 0.0523 | 30.45 | 81.78   | 184.18 | 80.94  | 0.9477 | 102.84 | 122.64  | 54.83  |
| plascab   | <i>Plasmodium chabaudi</i>            | O_AI    | 0.0952 | 56.57 | 76.19   | 59.41  | 84.4   | 0.9048 | 101.5  | 124.37  | 61.08  |

|          |                                     |      |        |        |        |        |         |        |         |         |         |  |  |  |  |  |  |  |  |
|----------|-------------------------------------|------|--------|--------|--------|--------|---------|--------|---------|---------|---------|--|--|--|--|--|--|--|--|
| choncris | <i>Chondrus crispus</i>             | O_Rh | 0.7062 | 79.95  | 109.16 | 89.37  | 154.26  | 0.2938 | 99.81   | 125.68  | 74.18   |  |  |  |  |  |  |  |  |
| gregniph | <i>Gregarina niphandrodes</i>       | O_AI | 0.3824 | 43.5   | 48.42  | 19.56  | 77.02   | 0.6176 | 97.71   | 130.14  | 85.51   |  |  |  |  |  |  |  |  |
| tertrher | <i>Tetrahymena thermophila</i>      | O_AI | 0.3106 | 54.86  | 56.99  | 8.48   | 60.05   | 0.6894 | 71.49   | 130.93  | 156.01  |  |  |  |  |  |  |  |  |
| acytsubg | <i>Acytostelium subglobosum</i>     | O_Am | 0.8571 | 69.85  | 73.99  | 15.81  | 100.79  | 0.1429 | 84.71   | 130.98  | 121.97  |  |  |  |  |  |  |  |  |
| plasyoel | <i>Plasmodium yoelii</i>            | O_AI | 0.0725 | 24.87  | 71.38  | 160.53 | 84.23   | 0.9275 | 106.34  | 133.79  | 73.26   |  |  |  |  |  |  |  |  |
| nasberg  | <i>Plasmodium berghei</i>           | O_AI | 0.0571 | 46.42  | 55.56  | 34.34  | 76.42   | 0.9429 | 105.93  | 134.11  | 75.77   |  |  |  |  |  |  |  |  |
| naegfowl | <i>Naegleria fowleri</i>            | O_He | 0.4767 | 53.53  | 64.23  | 29     | 92.95   | 0.5233 | 112.25  | 136.77  | 83.16   |  |  |  |  |  |  |  |  |
| entamosh | <i>Entamoeba moshkovskii</i>        | O_Am | 0.7237 | 45.04  | 47.25  | 8.3    | 64.49   | 0.2763 | 87.36   | 137.03  | 131.27  |  |  |  |  |  |  |  |  |
| plasreic | <i>Plasmodium reichenowi</i>        | O_AI | 0.0062 | 17     | 31.67  | 184.93 | 70.21   | 0.9938 | 112.89  | 140.19  | 75.57   |  |  |  |  |  |  |  |  |
| guilthet | <i>Guillardia theta</i>             | O_Cr | 0.6076 | 47.2   | 49.01  | 7.2    | 59.93   | 0.3924 | 94.32   | 141.31  | 133.58  |  |  |  |  |  |  |  |  |
| ichtmult | <i>Ichthyophthirius multifiliis</i> | O_AI | 0.5472 | 46.45  | 50.99  | 13.73  | 67.93   | 0.4528 | 75.57   | 141.9   | 174.45  |  |  |  |  |  |  |  |  |
| pythiway | <i>Pythium iwayamai</i>             | O_St | 0.6455 | 78.18  | 82.37  | 16.67  | 96.1    | 0.3545 | 83.51   | 142.06  | 164.77  |  |  |  |  |  |  |  |  |
| dictfasc | <i>Dictyostelium fasciculatum</i>   | O_Am | 0.5798 | 74.56  | 79.02  | 17.77  | 90.94   | 0.4202 | 68.67   | 144.37  | 198.84  |  |  |  |  |  |  |  |  |
| dictpurp | <i>Dictyostelium purpureum</i>      | O_Am | 0.6665 | 70.7   | 73.92  | 12.83  | 87.12   | 0.3335 | 69.91   | 146.43  | 203.58  |  |  |  |  |  |  |  |  |
| phytlate | <i>Phytophthora lateralis</i>       | O_St | 0.3672 | 67.14  | 70.08  | 11.7   | 74.32   | 0.6328 | 76.36   | 151.45  | 197.09  |  |  |  |  |  |  |  |  |
| phytcin  | <i>Phytophthora cinnamomi</i>       | O_St | 0.9738 | 71.22  | 75.94  | 16.22  | 128.99  | 0.0262 | 61.25   | 151.84  | 259.91  |  |  |  |  |  |  |  |  |
| emilhuxl | <i>Emiliana huxleyi</i>             | O_Ha | 0.2593 | 70.73  | 72.66  | 7.69   | 74.48   | 0.7407 | 92.14   | 158.88  | 175.56  |  |  |  |  |  |  |  |  |
| nanngadi | <i>Nannochloropsis gaditana</i>     | O_St | 0.0479 | 49.73  | 53.58  | 15.31  | 61.03   | 0.9521 | 124.75  | 159.2   | 105.08  |  |  |  |  |  |  |  |  |
| perkmari | <i>Perkinsus marinus</i>            | O_AI | 0.6462 | 45.63  | 47.25  | 6.46   | 58.07   | 0.3538 | 82.98   | 160.19  | 202.49  |  |  |  |  |  |  |  |  |
| pseumult | <i>Pseudo-nitzschia multiseriis</i> | O_St | 0.0063 | 40.89  | 46.01  | 19.01  | 67.92   | 0.9937 | 118.12  | 160.34  | 111.64  |  |  |  |  |  |  |  |  |
| aureanop | <i>Aureococcus anophagefferens</i>  | O_St | 0.18   | 51.38  | 54.45  | 12.2   | 54.58   | 0.82   | 67.18   | 160.87  | 253.94  |  |  |  |  |  |  |  |  |
| fragcyll | <i>Fragilariopsis cylindrus</i>     | O_St | 0.0044 | 45.83  | 78.1   | 98.06  | 78.97   | 0.9956 | 131.71  | 163.93  | 89.96   |  |  |  |  |  |  |  |  |
| polypall | <i>Polysiphonidium pallidum</i>     | O_Am | 0.5233 | 73.2   | 78.01  | 19.14  | 90.18   | 0.4767 | 76.23   | 166.14  | 236.41  |  |  |  |  |  |  |  |  |
| plafalc  | <i>Plasmodium falciparum</i>        | O_AI | 0.8061 | 115.8  | 140.08 | 70.29  | 220.74  | 0.1939 | 66.07   | 171     | 284.27  |  |  |  |  |  |  |  |  |
| phytkern | <i>Phytophthora kernoviae</i>       | O_St | 0.3024 | 73.57  | 76.98  | 13.57  | 79.77   | 0.6976 | 90.37   | 172.99  | 216.99  |  |  |  |  |  |  |  |  |
| plascyno | <i>Plasmodium cynomolgi</i>         | O_AI | 0.1338 | 39.02  | 48.41  | 30.63  | 90.84   | 0.8662 | 145.63  | 187.12  | 116.13  |  |  |  |  |  |  |  |  |
| eperfalc | <i>Epermenia falciformis</i>        | O_Op | 0.0527 | 56.45  | 61.33  | 15.04  | 83.54   | 0.9473 | 139.17  | 188.94  | 132.73  |  |  |  |  |  |  |  |  |
| cytafeli | <i>Cytauxzoon felis</i>             | O_AI | 0.6391 | 37.16  | 39.65  | 7.42   | 56.74   | 0.3609 | 122.45  | 195.34  | 210.29  |  |  |  |  |  |  |  |  |
| plasinui | <i>Plasmodium inui</i>              | O_AI | 0.7995 | 147.61 | 164.98 | 64.77  | 229.63  | 0.2005 | 100.78  | 197.04  | 252.47  |  |  |  |  |  |  |  |  |
| auralima | <i>Aurantiochytrium limacinum</i>   | O_St | 0.2328 | 77.41  | 166.55 | 349.77 | 110.04  | 0.7672 | 112.52  | 205.29  | 244.05  |  |  |  |  |  |  |  |  |
| bigenata | <i>Bigelowiella natans</i>          | O_Rh | 0.4285 | 73.92  | 85     | 44.08  | 135.13  | 0.5715 | 170.79  | 210.65  | 115.18  |  |  |  |  |  |  |  |  |
| plaviva  | <i>Plasmodium vivax</i>             | O_AI | 0.8077 | 139.87 | 160.92 | 67.52  | 239.46  | 0.1923 | 101.26  | 219.01  | 309.27  |  |  |  |  |  |  |  |  |
| salprose | <i>Salpingoeca rosetta</i>          | O_Op | 0.9212 | 197.53 | 220.48 | 91.27  | 367.94  | 0.0788 | 100.87  | 228.76  | 336.17  |  |  |  |  |  |  |  |  |
| eimemaxi | <i>Eimeria maxima</i>               | O_AI | 0.3402 | 142.13 | 184.48 | 114.34 | 173.51  | 0.6598 | 173.11  | 236.79  | 188.19  |  |  |  |  |  |  |  |  |
| eimeneca | <i>Eimeria necatrix</i>             | O_AI | 0.4407 | 138.7  | 206.73 | 178.47 | 207.49  | 0.5593 | 172.91  | 243.82  | 204.81  |  |  |  |  |  |  |  |  |
| plasknow | <i>Plasmodium knowlesi</i>          | O_AI | 0.8906 | 141.54 | 165.98 | 75.53  | 299.38  | 0.1094 | 127.05  | 253     | 332.21  |  |  |  |  |  |  |  |  |
| eimemiti | <i>Eimeria mitis</i>                | O_AI | 0.0929 | 107.92 | 137.61 | 78.2   | 107.68  | 0.9071 | 163.59  | 260.9   | 260.62  |  |  |  |  |  |  |  |  |
| eimeprae | <i>Eimeria praecox</i>              | O_AI | 0.201  | 117.31 | 152.64 | 92.68  | 137.78  | 0.799  | 167.67  | 263.42  | 257.35  |  |  |  |  |  |  |  |  |
| eimebrun | <i>Eimeria brunetti</i>             | O_AI | 0.1409 | 118.97 | 161.81 | 112.6  | 129.63  | 0.859  | 170.35  | 272.52  | 271.9   |  |  |  |  |  |  |  |  |
| plafrag  | <i>Plasmodium fragile</i>           | O_AI | 0.7347 | 139.64 | 153.54 | 55.31  | 210.77  | 0.2653 | 141.34  | 282.95  | 371.46  |  |  |  |  |  |  |  |  |
| fontalba | <i>Fonticola alba</i>               | O_Op | 0.8526 | 127.92 | 146.14 | 67.13  | 246.14  | 0.1474 | 113.68  | 290.11  | 478.13  |  |  |  |  |  |  |  |  |
| albulalb | <i>Albugo laibachii</i>             | O_St | 0.8839 | 52.19  | 54.45  | 9.02   | 79.1    | 0.1161 | 105.6   | 298.96  | 535.47  |  |  |  |  |  |  |  |  |
| aphaasta | <i>Aphanomyces astaci</i>           | O_St | 0.7854 | 51.66  | 58.17  | 18.75  | 112.25  | 0.2146 | 178.76  | 306.63  | 352.81  |  |  |  |  |  |  |  |  |
| vitrbra  | <i>Vitrella brassicaformis</i>      | O_AI | 0.972  | 74.12  | 81.49  | 26.48  | 195.59  | 0.028  | 267.11  | 313.68  | 170.49  |  |  |  |  |  |  |  |  |
| capsowcz | <i>Capsaspora owczarzaki</i>        | O_Op | 0.8432 | 88.2   | 99.38  | 37.3   | 185.85  | 0.1568 | 243.79  | 361.12  | 351.18  |  |  |  |  |  |  |  |  |
| sphaarct | <i>Sphaerofорма arctica</i>         | O_Op | 0.6805 | 237.27 | 327.27 | 282.04 | 639.12  | 0.3195 | 622.35  | 790.78  | 478.77  |  |  |  |  |  |  |  |  |
| sarcneur | <i>Sarcocystis neurona3</i>         | O_AI | 0.214  | 144.44 | 315.99 | 449.99 | 537.87  | 0.786  | 1055.29 | 1350.46 | 1056.28 |  |  |  |  |  |  |  |  |
| schiagr  | <i>Schizochytrium aggregatum</i>    | O_St | 0.967  | 86.9   | 136.14 | 132.54 | 2053.25 | 0.033  | 2325.23 | 3687.76 | 3793.52 |  |  |  |  |  |  |  |  |

#### (H) Metazoan three components

| SpeclD   | Species                            | TaxonID | a1     | mode1 | median1 | width1 | boder1 | a2     | mode2  | median2 | width2 | boder2 | a3     | mode3   | median3 | width3  |
|----------|------------------------------------|---------|--------|-------|---------|--------|--------|--------|--------|---------|--------|--------|--------|---------|---------|---------|
| bursxylo | <i>Bursaphelenchus xylophilus</i>  | M_Ne    | 0.3532 | 36.01 | 38.24   | 6.83   | 58.95  | 0.3661 | 63.18  | 82.69   | 59.56  | 215.61 | 0.2807 | 260.06  | 425.53  | 446.44  |
| caenjapo | <i>Caenorhabditis japonica</i>     | M_Ne    | 0.4926 | 46.63 | 49.71   | 9.44   | 76.03  | 0.287  | 131.69 | 268.73  | 361.65 | 766.08 | 0.2205 | 957.04  | 1294.59 | 1076.07 |
| diphlatu | <i>Diphyllobothrium latum</i>      | M_PI    | 0.1593 | 34.83 | 36.51   | 6.47   | 46     | 0.3525 | 88.38  | 160.61  | 189.46 | 538.96 | 0.4882 | 1086.3  | 1559.68 | 1432.03 |
| echicana | <i>Echinococcus canadensis</i>     | M_PI    | 0.1395 | 33.95 | 36.68   | 8.55   | 50.39  | 0.1616 | 72.8   | 75.55   | 10.92  | 84.4   | 0.6989 | 188.86  | 489.27  | 805.68  |
| echicapr | <i>Echinostoma caproni</i>         | M_PI    | 0.1447 | 38.15 | 41.07   | 9.38   | 47.03  | 0.3112 | 56.37  | 168.45  | 321.86 | 640.14 | 0.544  | 1197.47 | 1914.57 | 2035    |
| echigran | <i>Echinococcus granulosus</i>     | M_PI    | 0.1399 | 34.15 | 37.17   | 9.12   | 54.66  | 0.1759 | 72.84  | 75.56   | 10.79  | 86.34  | 0.6842 | 189.12  | 478.2   | 778.06  |
| echimult | <i>Echinococcus multilocularis</i> | M_PI    | 0.1443 | 33.9  | 37.12   | 9.4    | 57.14  | 0.1784 | 72.72  | 75.46   | 10.91  | 87.15  | 0.6773 | 189.57  | 472.02  | 760.4   |
| hydataen | <i>Hydatigera taeniaeformis</i>    | M_PI    | 0.181  | 32.88 | 36.96   | 10.73  | 58.05  | 0.2029 | 71.84  | 74.87   | 12.04  | 86.19  | 0.6161 | 178.62  | 360.18  | 476.69  |
| hymedimi | <i>Hymenolepis diminuta</i>        | M_PI    | 0.2361 | 35.88 | 38.07   | 8.2    | 54.44  | 0.3254 | 70.19  | 74.31   | 11.93  | 103.4  | 0.4385 | 469.82  | 874.15  | 1094.16 |
| hymemicr | <i>Hymenolepis microstoma</i>      | M_PI    | 0.1657 | 37.02 | 39.31   | 8.54   | 51.57  | 0.2996 | 69.97  | 74.07   | 11.95  | 97.13  | 0.5347 | 459.15  | 900.4   | 1183.85 |
| hymenana | <i>Hymenolepis nana</i>            | M_PI    | 0.2253 | 35.42 | 38.19   | 9.08   | 59.49  | 0.303  | 70.32  | 74.2    | 11.81  | 99.46  | 0.4717 | 319.58  | 672.94  | 927.47  |
| mesocort | <i>Mesocostoides corti</i>         | M_PI    | 0.1308 | 33.95 | 35.4    | 5.75   | 44.05  | 0.1561 | 72.35  | 75.74   | 12.5   | 86.41  | 0.7131 | 232.78  | 462.84  | 604.98  |
| protxeno | <i>Protopolystoma xenopodis</i>    | M_PI    | 0.0446 | 28.93 | 30.11   | 3.99   | 31.88  | 0.3956 | 62.39  | 75.71   | 46.3   | 141.88 | 0.5598 | 274.52  | 555.63  | 737.42  |
| romaculi | <i>Romanomermis culicivorax</i>    | M_Ne    | 0.1266 | 56.47 | 58.49   | 8.03   | 64.05  | 0.4527 | 121.21 | 300.71  | 479.84 | 941.74 | 0.4206 | 1261.52 | 1882.51 | 1840.61 |
| schisol  | <i>Schistocephalus solidus</i>     | M_PI    | 0.0872 | 33.1  | 36.23   | 8.97   | 40.89  | 0.4103 | 66.24  | 177.12  | 308.57 | 736.72 | 0.5026 | 1266.52 | 1904.43 | 1885.3  |
| schmmedi | <i>Schmidtea mediterranea</i>      | M_PI    | 0.401  | 45.15 | 46.94   | 6.85   | 51.37  | 0.3057 | 31.11  | 93.29   | 215.13 | 748.21 | 0.2934 | 1269.96 | 1999.85 | 2121.54 |
| spirerir | <i>Spirometra erinaceieuropaei</i> | M_PI    | 0.1275 | 35.15 | 36.92   | 6.69   | 43.5   | 0.4064 | 71.62  | 130.1   | 153.67 | 504.31 | 0.4661 | 1057.54 | 1563.93 | 1510.45 |
| taenasia | <i>Taenia asiatica</i>             | M_PI    | 0.1813 | 34.13 | 36.26   | 7.31   | 49.06  | 0.1924 | 72.25  | 75.3    | 11.72  | 85.49  | 0.6263 | 175.96  | 398.37  | 585.85  |
| taensoli | <i>Taenia solium</i>               | M_PI    | 0.1304 | 33.7  | 36.51   | 8.59   | 48.24  | 0.1622 | 72.87  | 75.8    | 11.65  | 83.73  | 0.7073 | 188.26  | 435.33  | 650.13  |
| tricroge | <i>Trichobilharzia regenti</i>     | M_PI    | 0.1171 | 41.85 | 45.89   | 16.02  | 58.33  | 0.2988 | 100.92 | 216.22  | 302.99 | 697.7  | 0.5841 | 1454.38 | 2033.15 | 1798.4  |

a) Width is defined by  $Q(3/4) - Q(1/4)$ , where  $Q(y)$  denotes  $y$ -quantile.

b) Boundary between the  $i$ -th and  $(i+1)$ -th components,  $b_i$ , is defined by the formula:  $b_i = Q\left(\sum_{j=1}^i a_j\right)$



**Supplementary Table S4. Components of consensus ILD of each cluster.**

| Cluster | #species | #sample | rRMSE    | #component | a1     | mode1  | median1 | width1 <sup>a)</sup> | border1 <sup>b)</sup> | a2     | mode2   | median2 | width2 <sup>a)</sup> | boder2 <sup>b)</sup> | a3     | mode3   | median3 | width3 <sup>a)</sup> |
|---------|----------|---------|----------|------------|--------|--------|---------|----------------------|-----------------------|--------|---------|---------|----------------------|----------------------|--------|---------|---------|----------------------|
| C1      | 361      | 75224   | 1.43E-04 | 2          | 0.6169 | 52.95  | 56.74   | 11.41                | 66.72                 | 0.3831 | 53.38   | 99.84   | 122.16               |                      |        |         |         |                      |
| C2      | 9        | 39111   | 1.91E-04 | 3          | 0.5441 | 53.46  | 55.54   | 8.19                 | 67.69                 | 0.42   | 80.87   | 261.15  | 536.61               | 3468.55              | 0.0359 | 1694.37 | 2594.13 | 2377.8               |
| C3      | 12       | 64331   | 5.41E-04 | 2          | 0.7465 | 46.8   | 48.59   | 6.37                 | 54.86                 | 0.2535 | 37.72   | 60.55   | 59.93                |                      |        |         |         |                      |
| C4      | 12       | 66727   | 1.68E-04 | 3          | 0.4401 | 45.47  | 46.92   | 5.29                 | 51.41                 | 0.2597 | 42.13   | 74.49   | 130.73               | 214.23               | 0.3002 | 208     | 511.21  | 802.21               |
| C5      | 2        | 48738   | 2.38E-04 | 3          | 0.4884 | 45.34  | 46.76   | 5.54                 | 49.57                 | 0.2775 | 17.39   | 56.14   | 206.94               | 861.49               | 0.2342 | 1266.23 | 2004.97 | 2143.36              |
| C6      | 17       | 63567   | 1.81E-04 | 3          | 0.6393 | 44.15  | 46.6    | 9.45                 | 61.72                 | 0.2492 | 85.25   | 105.32  | 73.28                | 230.79               | 0.1115 | 293.08  | 498.6   | 542                  |
| C7      | 2        | 43807   | 7.53E-04 | 3          | 0.8841 | 41.92  | 43.38   | 5.46                 | 53.9                  | 0.1105 | 50.04   | 66.46   | 48.09                | 293.61               | 0.0054 | 302.36  | 413.92  | 297.34               |
| C8      | 46       | 66961   | 1.36E-04 | 2          | 0.5707 | 73.99  | 78.58   | 18.24                | 89.92                 | 0.4293 | 71.7    | 133.48  | 162.2                |                      |        |         |         |                      |
| C9      | 12       | 62605   | 2.00E-04 | 2          | 0.6652 | 63.89  | 66.91   | 11.78                | 77.15                 | 0.3348 | 52.04   | 113     | 162.87               |                      |        |         |         |                      |
| C10     | 43       | 53317   | 8.85E-05 | 3          | 0.4    | 59.6   | 62.79   | 12.54                | 77.35                 | 0.3721 | 84.93   | 259.98  | 502.2                | 1359.4               | 0.2279 | 1256.47 | 2845.05 | 4251.72              |
| C11     | 6        | 35712   | 4.87E-04 | 2          | 0.1044 | 27.38  | 30.04   | 10.51                | 35.86                 | 0.8956 | 60.09   | 83.25   | 63.67                |                      |        |         |         |                      |
| C12     | 21       | 39475   | 4.74E-04 | 1          | 1      | 47.62  | 111.25  | 177.31               |                       |        |         |         |                      |                      |        |         |         |                      |
| C13     | 10       | 32576   | 6.07E-04 | 2          | 0.5375 | 31.1   | 37.59   | 18.02                | 58.03                 | 0.4625 | 63.55   | 94.25   | 86.24                |                      |        |         |         |                      |
| C14     | 11       | 66623   | 1.11E-04 | 3          | 0.2197 | 35.55  | 37.72   | 7.52                 | 53.45                 | 0.2316 | 70.38   | 73.86   | 13.16                | 89.47                | 0.5486 | 183.2   | 454.12  | 723.84               |
| C15     | 2        | 24640   | 1.32E-03 | 3          | 0.5846 | 36.65  | 37.79   | 4.26                 | 43.83                 | 0.3171 | 52.83   | 87.8    | 92.67                | 314.24               | 0.0983 | 345.01  | 377.96  | 131.06               |
| C16     | 3        | 23628   | 1.27E-03 | 3          | 0.7123 | 34.12  | 34.92   | 2.78                 | 40.75                 | 0.2489 | 51.2    | 76.25   | 66.67                | 289.23               | 0.0389 | 191.61  | 492.93  | 886.02               |
| C17     | 1        | 45249   | 1.32E-03 | 3          | 0.8996 | 37.55  | 38.39   | 3.16                 | 57.13                 | 0.0912 | 86.53   | 95.2    | 29.71                | 173.06               | 0.0091 | 122.71  | 396.64  | 777.71               |
| C18     | 183      | 55132   | 3.84E-05 | 3          | 0.0806 | 82.11  | 109.06  | 73.37                | 148.4                 | 0.1411 | 213.09  | 361     | 405.05               | 492.4                | 0.7783 | 803.08  | 2055    | 3380.58              |
| C19     | 5        | 66033   | 7.63E-05 | 2          | 0.005  | 64.93  | 93.19   | 83.09                | 20.94                 | 0.995  | 427.82  | 751.33  | 874.39               |                      |        |         |         |                      |
| C20     | 1        | 87781   | 2.45E-05 | 3          | 0.1388 | 86.4   | 130.66  | 135.67               | 487.53                | 0.1519 | 816.17  | 1418.83 | 1607.61              | 1887.94              | 0.7093 | 3222.13 | 5472.19 | 6046.68              |
| C21     | 1        | 2493    | 4.34E-04 | 3          | 0.1263 | 54.22  | 55.92   | 6.36                 | 62.46                 | 0.2435 | 79.69   | 187.24  | 307.52               | 698.29               | 0.6302 | 1281.52 | 3580.84 | 6268.81              |
| C22     | 11       | 66619   | 6.19E-05 | 2          | 0.583  | 354.84 | 425.37  | 267.21               | 502.77                | 0.417  | 157.02  | 504.91  | 1010.95              |                      |        |         |         |                      |
| C23     | 15       | 67024   | 6.21E-05 | 3          | 0.125  | 35.17  | 37.62   | 8.04                 | 44.44                 | 0.2512 | 60.93   | 165.2   | 292.65               | 543.98               | 0.6238 | 1197.28 | 1914.73 | 2035.87              |
| C24     | 31       | 57055   | 1.63E-04 | 1          | 1      | 165.38 | 246.43  | 223.92               |                       |        |         |         |                      |                      |        |         |         |                      |
| C25     | 33       | 61410   | 2.15E-04 | 2          | 0.5645 | 119.44 | 147.4   | 79.56                | 161.9                 | 0.4355 | 76.29   | 152.7   | 200.79               |                      |        |         |         |                      |
| C26     | 124      | 76805   | 5.05E-05 | 3          | 0.2319 | 82.7   | 90.39   | 24.72                | 116.7                 | 0.1847 | 156.81  | 261.38  | 276.8                | 262.9                | 0.5834 | 277.85  | 743.03  | 1248.97              |
| C27     | 25       | 45147   | 1.02E-04 | 3          | 0.5223 | 70.78  | 76.2    | 18.24                | 105.39                | 0.4457 | 124.97  | 445.98  | 995.05               | 8046.83              | 0.032  | 2237.1  | 4679.63 | 6474.48              |
| C28     | 17       | 66047   | 2.30E-04 | 3          | 0.675  | 82.89  | 89.22   | 21.39                | 116.82                | 0.3244 | 106.75  | 251.82  | 381.24               | 15715.7              | 0.0006 | 1774.09 | 3549.01 | 5031.62              |
| C29     | 2        | 37579   | 4.41E-03 | 2          | 0.8617 | 29.87  | 30.4    | 2.1                  | 33.75                 | 0.1383 | 24.96   | 40.75   | 42.39                |                      |        |         |         |                      |
| C30     | 1        | 19910   | 2.09E-02 | 2          | 0.0558 | 21.15  | 22.7    | 5.94                 | 27.07                 | 0.9442 | 26.02   | 28.16   | 12.58                |                      |        |         |         |                      |
| C31     | 1        | 74862   | 1.18E-02 | 2          | 0.9989 | 23.64  | 24.72   | 3.49                 | 56.91                 | 0.0011 | -270.29 | 46959.8 | 218301145            |                      |        |         |         |                      |
| C32     | 1        | 29945   | 8.26E-03 | 2          | 0.9937 | 20     | 23.55   | 27.11                | 185775                | 0.0063 | 20.55   | 21.92   | 5.28                 |                      |        |         |         |                      |

a) Width is defined by  $Q(3/4) - Q(1/4)$ , where  $Q(y)$  denotes  $y$ -quantile.

b) Boundary between the  $i$ -th and  $(i+1)$ -th components,  $b_i$ , is defined by the formula:

$$b_i = Q\left(\sum_{j=1,i} a_j\right)$$

Supplementary Table S5. Contingency table between taxonomic clusters and ILD-based clustering

| Kingdom       | Taxon                 | Abbr. | C1  | C2 | C3 | C4 | C5 | C6 | C7 | C8 | C9 | C10 | C11 | C12 | C13 | C14 | C15 | C16 | C17 | C18 | C19 | C20 | C21 | C22 | C23 | C24 | C25 | C26 | C27 | C28 | C29 | C30 | C31 | C32 | Sum  |
|---------------|-----------------------|-------|-----|----|----|----|----|----|----|----|----|-----|-----|-----|-----|-----|-----|-----|-----|-----|-----|-----|-----|-----|-----|-----|-----|-----|-----|-----|-----|-----|-----|-----|------|
| Fungi         | Ascomycota            | As    | 226 | -  | 4  | -  | -  | 6  | 1  | 6  | 2  | -   | 2   | 8   | 2   | -   | -   | -   | -   | -   | -   | -   | -   | -   | -   | -   | -   | -   | -   | -   | -   | -   | -   | -   | 257  |
|               | Basidiomycota         | Ba    | 109 | -  | 4  | -  | 1  | -  | 1  | 13 | 3  | -   | 1   | 1   | 2   | -   | -   | -   | 1   | -   | -   | -   | -   | -   | -   | -   | 3   | 1   | -   | -   | -   | -   | -   | -   | 140  |
|               | Glomeromycetes        | Gl    | -   | -  | -  | -  | -  | -  | -  | 1  | -  | -   | -   | -   | -   | -   | -   | -   | -   | -   | -   | -   | -   | -   | -   | -   | -   | -   | -   | -   | -   | -   | -   | 1   |      |
|               | Entomophthoromycete   | En    | 1   | -  | 1  | -  | -  | -  | -  | -  | -  | -   | -   | -   | -   | -   | -   | -   | -   | -   | -   | -   | -   | -   | -   | -   | -   | -   | -   | -   | -   | -   | -   | 2   |      |
|               | Mucoromycota          | Mu    | 7   | -  | -  | -  | -  | -  | -  | 1  | 1  | -   | -   | 1   | -   | -   | -   | -   | -   | -   | -   | -   | -   | -   | -   | -   | 3   | -   | -   | -   | -   | -   | -   | 13  |      |
|               | Blastocladiomycota    | Bl    | -   | -  | -  | -  | -  | -  | -  | 1  | -  | -   | -   | -   | -   | -   | -   | -   | -   | -   | -   | -   | -   | -   | -   | -   | -   | -   | -   | -   | -   | -   | -   | 1   |      |
|               | Chytridiomycota       | Ch    | -   | -  | -  | -  | -  | -  | -  | 1  | 1  | -   | -   | -   | -   | -   | -   | -   | -   | -   | -   | -   | -   | -   | -   | -   | -   | -   | -   | -   | -   | -   | -   | 2   |      |
|               | Neocallimastigomycete | Ne    | -   | -  | -  | -  | -  | -  | -  | -  | -  | -   | -   | -   | -   | -   | -   | -   | -   | -   | -   | -   | -   | -   | -   | -   | 2   | -   | -   | -   | -   | -   | -   | 2   |      |
|               | Cryptomycota          | Cr    | -   | -  | -  | -  | -  | -  | -  | -  | -  | -   | -   | -   | -   | -   | -   | -   | -   | -   | -   | -   | -   | -   | -   | -   | -   | -   | -   | -   | -   | 1   | -   | 1   |      |
| Animal        | Mammal                | Mm    | -   | -  | -  | -  | -  | -  | -  | -  | -  | -   | -   | -   | -   | -   | -   | -   | -   | 91  | -   | -   | -   | -   | -   | -   | -   | -   | -   | -   | -   | -   | -   | 91  |      |
|               | Bird                  | Av    | -   | -  | -  | -  | -  | -  | -  | -  | -  | -   | -   | -   | -   | -   | -   | -   | -   | 58  | -   | -   | -   | -   | -   | -   | -   | -   | -   | -   | -   | -   | -   | 58  |      |
|               | Reptile               | Rp    | -   | -  | -  | -  | -  | -  | -  | -  | -  | -   | -   | -   | -   | -   | -   | -   | -   | 10  | -   | -   | -   | -   | -   | -   | -   | -   | -   | -   | -   | -   | -   | 10  |      |
|               | Amphibia              | Am    | -   | -  | -  | -  | -  | -  | -  | -  | -  | -   | -   | -   | -   | -   | -   | -   | -   | 1   | -   | -   | -   | -   | -   | -   | -   | -   | -   | -   | -   | -   | -   | 1   |      |
|               | Sarcopterygii         | Sa    | -   | -  | -  | -  | -  | -  | -  | -  | -  | -   | -   | -   | -   | -   | -   | -   | -   | 1   | -   | -   | -   | -   | -   | -   | -   | -   | -   | -   | -   | -   | -   | 1   |      |
|               | Bony Fish             | Fs    | -   | -  | -  | -  | -  | -  | -  | -  | -  | -   | -   | -   | -   | -   | -   | -   | -   | 2   | -   | -   | -   | -   | -   | -   | -   | 24  | -   | -   | -   | -   | -   | 26  |      |
|               | Chordata              | Ch    | -   | -  | -  | -  | -  | -  | -  | -  | -  | -   | -   | -   | -   | -   | -   | -   | -   | 1   | -   | -   | 1   | -   | 1   | -   | -   | -   | -   | -   | -   | -   | -   | 3   |      |
|               | Echinodermata         | Ec    | -   | -  | -  | -  | -  | -  | -  | -  | -  | -   | -   | -   | -   | -   | -   | -   | -   | -   | 1   | -   | -   | -   | -   | -   | -   | -   | -   | -   | -   | -   | -   | 1   |      |
|               | Hemichordata          | He    | -   | -  | -  | -  | -  | -  | -  | -  | -  | -   | -   | -   | -   | -   | -   | -   | -   | 1   | -   | -   | -   | -   | -   | -   | -   | -   | -   | -   | -   | -   | -   | 1   |      |
|               | Brachiopoda           | Br    | -   | -  | -  | -  | -  | -  | -  | -  | -  | -   | -   | -   | -   | -   | -   | -   | -   | -   | -   | -   | 1   | -   | -   | -   | -   | -   | -   | -   | -   | -   | -   | 1   |      |
|               | Mollusca              | Mo    | -   | -  | -  | -  | -  | -  | -  | -  | -  | -   | -   | -   | -   | -   | -   | -   | -   | 3   | -   | -   | 1   | -   | -   | -   | 1   | -   | -   | -   | -   | -   | -   | 5   |      |
|               | Annelida              | An    | -   | 1  | -  | -  | -  | -  | -  | -  | -  | -   | -   | -   | -   | -   | -   | -   | -   | -   | -   | -   | -   | -   | -   | 1   | -   | -   | -   | -   | -   | -   | -   | 2   |      |
|               | Platyhelminthes       | Pl    | -   | -  | -  | -  | 1  | -  | -  | -  | -  | -   | -   | 1   | -   | 10  | -   | -   | -   | -   | -   | -   | -   | -   | 15  | -   | 1   | -   | -   | -   | -   | -   | -   | 28  |      |
|               | Nematoda              | Ne    | 4   | 4  | -  | 11 | -  | 6  | -  | -  | -  | 14  | -   | 6   | -   | 1   | -   | -   | -   | 3   | -   | -   | -   | -   | -   | 15  | 2   | 2   | -   | -   | -   | -   | -   | 68  |      |
|               | Priapulida            | Pr    | -   | -  | -  | -  | -  | -  | -  | -  | -  | -   | -   | -   | -   | -   | -   | -   | -   | -   | -   | -   | -   | 1   | -   | -   | -   | -   | -   | -   | -   | -   | -   | 1   |      |
|               | Arthropoda            | Ar    | 1   | -  | -  | -  | -  | -  | -  | 1  | 1  | 1   | -   | -   | -   | -   | -   | -   | -   | 3   | -   | 1   | -   | -   | -   | -   | 1   | -   | 1   | -   | -   | -   | -   | 10  |      |
| Insecta       | In                    | -     | 4   | -  | 1  | -  | -  | -  | 1  | -  | 28 | -   | -   | -   | -   | -   | -   | -   | 9   | -   | -   | 1   | 2   | -   | -   | -   | 26  | 24  | 2   | -   | -   | -   | 98  |     |      |
| Cnidaria      | Cn                    | -     | -   | -  | -  | -  | -  | -  | -  | -  | -  | -   | -   | -   | -   | -   | -   | -   | -   | 2   | -   | -   | -   | -   | -   | -   | -   | 1   | -   | -   | -   | 1   | 4   |     |      |
| Ctenophora    | Ct                    | -     | -   | -  | -  | -  | -  | -  | -  | -  | -  | -   | -   | -   | -   | -   | -   | -   | -   | -   | -   | -   | -   | -   | -   | -   | 1   | -   | -   | -   | -   | -   | 1   |     |      |
| Porifera      | Po                    | -     | -   | -  | -  | -  | -  | -  | -  | -  | -  | -   | 1   | -   | -   | -   | -   | -   | -   | -   | -   | -   | -   | -   | -   | -   | -   | -   | -   | -   | -   | -   | 1   |     |      |
| Protist       | Opisthokonta          | Op    | -   | -  | -  | -  | -  | -  | -  | -  | -  | -   | -   | -   | -   | -   | -   | -   | -   | -   | -   | -   | 1   | -   | 1   | 2   | -   | -   | 2   | -   | -   | -   | 6   |     |      |
|               | Amoebozoa             | Am    | 3   | -  | -  | -  | 1  | -  | 5  | -  | 1  | -   | -   | -   | -   | -   | -   | -   | -   | -   | -   | -   | -   | -   | -   | -   | -   | -   | 1   | -   | -   | -   | 11  |     |      |
|               | Apusomonadidae        | Ap    | -   | -  | -  | -  | -  | -  | -  | -  | -  | 1   | -   | -   | -   | -   | -   | -   | -   | -   | -   | -   | -   | -   | -   | -   | -   | -   | -   | -   | -   | -   | 1   |     |      |
|               | Heterolobosea         | He    | 1   | -  | -  | -  | 1  | -  | -  | -  | -  | -   | -   | -   | -   | -   | -   | -   | -   | -   | -   | -   | -   | -   | -   | -   | -   | -   | -   | -   | -   | -   | 2   |     |      |
|               | Haptophyta            | Ha    | -   | -  | -  | -  | -  | -  | 1  | -  | -  | -   | -   | -   | -   | -   | -   | -   | -   | -   | -   | -   | -   | -   | -   | -   | -   | -   | -   | -   | -   | -   | 1   |     |      |
|               | Alveolata             | Al    | 2   | -  | -  | -  | 2  | -  | 1  | -  | 1  | 1   | 5   | -   | 2   | 3   | -   | -   | 1   | -   | -   | 4   | -   | 6   | 11  | -   | -   | -   | -   | -   | 1   | -   | 40  |     |      |
|               | Heterokonta           | St    | 4   | -  | 3  | -  | -  | -  | 14 | 4  | -  | -   | 1   | -   | -   | -   | -   | -   | -   | -   | -   | -   | -   | -   | 1   | 4   | -   | -   | -   | 2   | -   | -   | 33  |     |      |
| Rhizaria      | Rh                    | 1     | -   | -  | -  | -  | -  | -  | -  | -  | 1  | -   | -   | -   | -   | -   | -   | -   | -   | -   | -   | -   | -   | -   | -   | 2   | -   | -   | -   | -   | -   | 4   |     |     |      |
| Cryptophyta   | Cr                    | -     | -   | -  | -  | 1  | -  | -  | -  | -  | -  | -   | -   | -   | -   | -   | -   | -   | -   | -   | -   | -   | -   | -   | -   | -   | -   | -   | -   | -   | -   | 1   |     |     |      |
| Plant         | Eudicots              | Eu    | -   | -  | -  | -  | -  | -  | -  | -  | -  | -   | -   | -   | -   | -   | -   | -   | -   | -   | -   | -   | -   | -   | -   | -   | 48  | -   | 12  | -   | -   | -   | 60  |     |      |
|               | Monocots              | Mo    | -   | -  | -  | -  | -  | -  | -  | -  | -  | -   | -   | -   | -   | -   | -   | -   | -   | -   | -   | -   | -   | -   | -   | -   | 18  | -   | -   | -   | -   | -   | 18  |     |      |
|               | Amborellales          | Am    | -   | -  | -  | -  | -  | -  | -  | -  | -  | -   | -   | -   | -   | -   | -   | -   | -   | -   | -   | -   | -   | -   | -   | -   | 1   | -   | -   | -   | -   | -   | 1   |     |      |
|               | Streptophyta          | St    | 1   | -  | -  | -  | -  | -  | -  | -  | -  | -   | -   | -   | -   | -   | -   | -   | -   | -   | -   | -   | -   | -   | -   | -   | -   | -   | -   | -   | -   | -   | 1   |     |      |
|               | Marchantiopsida       | Ma    | -   | -  | -  | -  | -  | -  | -  | -  | -  | -   | -   | -   | -   | -   | -   | -   | -   | -   | -   | -   | -   | -   | 1   | -   | -   | -   | -   | -   | -   | -   | 1   |     |      |
|               | Funariales            | Fu    | -   | -  | -  | -  | -  | -  | -  | -  | -  | -   | -   | -   | -   | -   | -   | -   | -   | -   | -   | -   | -   | -   | 1   | -   | -   | -   | -   | -   | -   | -   | 1   |     |      |
|               | Chlorophyta           | Ch    | -   | -  | -  | -  | -  | -  | -  | -  | -  | -   | 1   | 1   | -   | -   | -   | -   | -   | 1   | -   | -   | -   | -   | -   | 4   | 3   | -   | -   | -   | -   | -   | 10  |     |      |
| Bangiophyceae | Ba                    | 1     | -   | -  | -  | -  | -  | -  | -  | -  | -  | -   | -   | -   | -   | -   | -   | -   | -   | -   | -   | -   | -   | -   | -   | -   | -   | -   | -   | -   | -   | 1   |     |     |      |
| <b>Sum</b>    |                       |       | 361 | 9  | 12 | 12 | 2  | 17 | 2  | 46 | 12 | 43  | 6   | 22  | 10  | 11  | 2   | 3   | 1   | 183 | 5   | 1   | 1   | 11  | 15  | 31  | 33  | 124 | 25  | 17  | 2   | 1   | 1   | 1   | 1022 |
